# Supplementary material for: How Participation, Physiology, Psychology, and Cognition Interact in Multi- Marathon Runners: Insights from a Harmonised Cross-Sectional Analysis
Source: Research Square preprint supplement (doi:10.21203/rs.3.rs-7392979/v1), 2025-12-29
Supplement: Supplementary file 1 [file 5068538b5d3b4a293d5dc989.xlsx]

## Sheet: Sheet0
DistributionChannel	UserLanguage	Consent	Country	Gender	Age	Marathons	TIPI Q1	TIPI Q2	TIPI Q3	TIPI Q4	TIPI Q5	TIPI Q6	TIPI Q7	TIPI Q8	TIPI Q9	TIPI Q10
Distribution Channel	User Language	Participant Consent Form I confirm I have read and understood the Information Leaflet for the above study. The information has been fully explained to me and I have been able to ask questions, all of which have been answered to my satisfaction. I understand that this study is entirely voluntary, and if I decide that I do not want to take part, I can stop taking part in this study at any time with…	What country are you resident?	Gender	Age? Please type in your age.	How many marathons or ultra marathons have you completed?	Here are a number of personality traits that may or may not apply to you. You should rate the extent to which the pair of traits applies to you, even if one characteristic applies more strongly than the other. I see myself as: - Extraverted, enthusiastic.	Here are a number of personality traits that may or may not apply to you. You should rate the extent to which the pair of traits applies to you, even if one characteristic applies more strongly than the other. I see myself as: - Critical, quarrelsome.	Here are a number of personality traits that may or may not apply to you. You should rate the extent to which the pair of traits applies to you, even if one characteristic applies more strongly than the other. I see myself as: - Dependable, self-disciplined.	Here are a number of personality traits that may or may not apply to you. You should rate the extent to which the pair of traits applies to you, even if one characteristic applies more strongly than the other. I see myself as: - Anxious, easily upset.	Here are a number of personality traits that may or may not apply to you. You should rate the extent to which the pair of traits applies to you, even if one characteristic applies more strongly than the other. I see myself as: - Open to new experiences, complex.	Here are a number of personality traits that may or may not apply to you. You should rate the extent to which the pair of traits applies to you, even if one characteristic applies more strongly than the other. I see myself as: - Reserved, quiet.	Here are a number of personality traits that may or may not apply to you. You should rate the extent to which the pair of traits applies to you, even if one characteristic applies more strongly than the other. I see myself as: - Sympathetic, warm.	Here are a number of personality traits that may or may not apply to you. You should rate the extent to which the pair of traits applies to you, even if one characteristic applies more strongly than the other. I see myself as: - Disorganized, careless.	Here are a number of personality traits that may or may not apply to you. You should rate the extent to which the pair of traits applies to you, even if one characteristic applies more strongly than the other. I see myself as: - Calm, emotionally stable.	Here are a number of personality traits that may or may not apply to you. You should rate the extent to which the pair of traits applies to you, even if one characteristic applies more strongly than the other. I see myself as: - Conventional, uncreative.
anonymous	EN	1	Ireland	1	59	379	6	2	6	2	6	6	2	2	6	6
anonymous	EN	1	Ireland	1	53	164	5	2	5	1	7	4	6	1	7	3
anonymous	EN	1	Ireland	1	40	109	2	6	6	5	3	6	4	3	3	5
anonymous	EN	1	Ireland	1	69	87	6	5	7	1	6	7	7	1	7	7
anonymous	EN	1	Ireland	1	41	25	6	5	6	2	7	4	4	2	6	4
anonymous	EN	1	Ireland	2	42	115	7	5	7	1	7	1	6	1	7	1
anonymous	EN	1	Ireland	2	55	228	1	2	7	3	6	7	6	2	6	5
anonymous	EN	1	Ireland	2	52	261	7	4	5	1	7	2	6	2	4	2
anonymous	EN	1	England	1	50	98	6	1	7	4	6	2	6	3	4	2
anonymous	EN	1	United Kingdom	2	60	176	1	1	7	6	4	7	7	1	6	4
anonymous	EN	1	United Kingdom	2	55	88	4	4	3	2	6	3	4	1	3	5
anonymous	EN	1	United Kingdom	2	66	232	4	2	7	1	7	2	7	1	7	1
anonymous	EN	1	Uk	2	50	102	6	2	7	1	7	2	7	2	7	7
anonymous	EN	1	England	1	52	113	6	5	6	2	6	1	6	1	5	2
anonymous	EN	1	England	2	59	198	6	5	6	5	6	2	7	3	6	2
anonymous	EN	1	United Kingdom	1	60	308	7	3	6	5	4	6	6	1	5	4
anonymous	EN	1	england	2	42	97	4	5	7	2	5	2	7	1	5	3
anonymous	EN	1	Ireland	1	41	11	5	5	7	6	7	3	5	4	4	3
anonymous	EN	1	Ireland	2	56	85	2	2	6	5	6	3	6	3	5	5
anonymous	EN	1	UK	2	45	82	5	2	7	2	5	5	6	1	6	5
anonymous	EN	1	United Kingdom	1	59	244	1	1	7	2	4	2	6	1	6	2
anonymous	EN	1	Uk	2	63	215	1	4	6	4	5	4	6	5	7	4
anonymous	EN	1	Ireland	1	59	123	5	1	6	6	3	3	6	3	4	6
anonymous	EN	1	Ireland	1	52	190	6	2	7	2	7	6	7	1	6	1
anonymous	EN	1	UK	1	59	472	3	1	7	2	6	6	4	1	6	6
anonymous	EN	1	Northern Ireland	1	38	78	3	5	4	5	4	6	5	5	4	5
anonymous	EN	1	Uk	2	49	88	5	2	5	5	6	6	7	4	3	1
anonymous	EN	1	Ireland	1	55	58	5	2	5	2	6	5	6	1	6	2
anonymous	EN	1	Northern Ireland	2	51	17	3	2	6	5	6	3	5	1	6	4
anonymous	EN	1	Ireland	1	54	98	6	3	7	2	6	1	6	2	6	3
anonymous	EN	1	England	2	36	56	6	2	7	2	7	1	7	1	7	6
anonymous	EN	1	Ireland	2	56	261	3	5	6	5	6	5	6	1	6	5
anonymous	EN	1	United Kingdom	1	53	251	1	3	5	6	5	6	6	2	3	3
anonymous	EN	1	England	2	75	227	7	1	7	1	7	1	7	1	7	4
anonymous	EN	1	England	2	63	92	2	2	7	6	5	6	7	1	4	3
anonymous	EN	1	Uk	1	53	117	2	5	7	5	4	5	2	1	4	4
anonymous	EN	1	United Kingdom	1	54	61	6	2	7	2	6	3	6	3	5	5
anonymous	EN	1	United Kingdom	1	46	114	1	2	5	5	6	7	5	1	4	5
anonymous	EN	1	England	2	44	24	1	4	7	2	5	7	5	1	3	5
anonymous	EN	1	Ireland	1	69	12	7	3	6	2	7	1	4	2	6	4
anonymous	EN	1	Uk	1	56	584	7	1	7	2	5	5	7	1	7	5
anonymous	EN	1	England	2	61	900	3	5	7	7	2	6	6	1	2	6
anonymous	EN	1	Ireland	1	34	83	2	4	5	5	4	5	3	6	3	6
anonymous	EN	1	United Kingdom	2	47	106	4	2	5	1	7	4	6	2	6	3
anonymous	EN	1	England	2	58	250	4	1	4	7	3	4	7	6	1	2
anonymous	EN	1	Northern Ireland	1	44	110	1	1	2	3	6	7	7	2	3	5
anonymous	EN	1	England	1	35	305	6	7	7	6	5	5	4	2	6	2
anonymous	EN	1	England	2	49	100	2	1	6	5	5	7	6	1	5	2
anonymous	EN	1	Ireland	1	53	79	3	1	7	5	5	7	7	1	7	4
anonymous	EN	1	Ireland	1	38	43	7	5	3	2	6	1	6	6	7	1
anonymous	EN	1	Ireland	1	48	18	1	5	6	1	7	6	6	6	7	2
anonymous	EN	1	N Ireland	1	53	30	5	2	6	3	6	2	7	3	6	4
anonymous	EN	1	UK	2	58	21	1	1	6	4	4	7	5	1	5	5
anonymous	EN	1	Ireland	2	48	110	5	4	6	5	5	6	6	4	6	1
anonymous	EN	1	Rep of Ireland	1	44	70	5	1	6	3	6	2	6	5	6	5
anonymous	EN	1	Scotland	1	56	313	3	1	7	1	4	2	3	1	7	6
anonymous	EN	1	England	1	45	38	6	3	5	2	7	5	6	2	3	2
anonymous	EN	1	United Kingdom	1	53	175	1	2	7	6	5	7	7	2	7	6
anonymous	EN	1	Ireland	2	55	179	7	1	7	5	6	6	7	2	6	5
anonymous	EN	1	England	2	51	104	1	1	6	5	3	4	7	7	6	1
anonymous	EN	1	England	1	49	153	4	5	6	4	7	5	6	5	7	3
anonymous	EN	1	Usa	1	60	80	6	2	7	2	6	2	6	5	6	3
anonymous	EN	1	England	1	58	248	5	1	7	1	2	3	3	3	6	5
anonymous	EN	1	United Kingdom	2	39	182	2	7	7	6	1	2	7	1	3	1
anonymous	EN	1	Ireland	1	43	363	6	1	5	2	6	5	6	2	6	3
anonymous	EN	1	Ireland	1	62	423	6	4	7	1	7	3	5	6	6	5
anonymous	EN	1	Ireland	1	53	119	7	6	7	1	7	7	7	1	7	1
anonymous	EN	1	Ireland	2	58	300	6	1	1	5	7	1	7	7	1	2
anonymous	EN	1	England	2	53	331	6	4	7	1	7	5	5	1	6	6
anonymous	EN	1	Ireland	2	74	947	6	1	5	3	7	6	7	1	7	5
anonymous	FI	1	Finland	2	57	933	5	5	1	6	3	6	5	2	5	5
anonymous	EN	1	Uk	2	53	23	6	1	7	7	1	4	5	1	3	3
anonymous	EN	1	UK	1	72	634	1	1	6	5	5	7	6	1	6	6
anonymous	EN	1	Ireland	2	44	101	2	1	7	5	6	7	7	4	6	4
anonymous	EN	1	England	2	66	425	2	1	7	7	4	7	7	1	4	3
anonymous	EN	1	England	1	37	173	5	3	2	5	5	5	7	4	1	2
anonymous	EN	1	UK	2	58	71	5	2	7	4	3	6	7	1	4	6
anonymous	EN	1	Ireland	2	60	150	1	1	7	1	4	7	7	1	7	6
anonymous	EN	1	United Kingdom	1	26	13	5	7	6	3	7	2	7	2	3	4
anonymous	EN	1	UK	1	55	165	1	4	6	3	5	7	5	2	6	5
anonymous	EN	1	united kingdom	2	48	118	6	5	5	6	7	1	6	1	3	3
anonymous	EN	1	England	1	32	472	4	6	6	4	6	3	5	3	5	4
anonymous	EN	1	Ireland	1	56	100	2	5	7	5	5	3	3	5	3	3
anonymous	EN	1	Ireland	2	55	135	5	5	5	2	5	3	5	3	5	3
anonymous	EN	1	UK	2	53	107	2	3	5	4	6	2	6	7	2	1
anonymous	EN	1	Ireland	2	45	74	6	5	7	1	7	3	7	6	6	5
anonymous	EN	1	England	1	44	198	7	6	7	2	6	3	6	1	7	6
anonymous	EN	1	Ireland	1	56	477	5	1	7	1	6	6	7	1	6	1
anonymous	EN	1	Ireland	2	56	99	6	6	3	1	5	2	5	3	5	5
anonymous	EN	1	Ireland	2	42	27	5	1	7	5	5	3	7	3	5	5
anonymous	EN	1	Ireland	2	52	14	7	2	7	1	6	1	6	1	7	6
anonymous	EN	1	Ireland	1	55	145	2	2	6	1	6	6	4	1	7	4
anonymous	EN	1	Uk	2	39	309	6	1	7	6	7	6	7	1	3	2
anonymous	EN	1	England	1	41	423	7	1	6	2	5	2	7	2	6	5
anonymous	EN	1	Wales	2	51	131	5	5	6	2	6	2	6	5	6	3
anonymous	EN	1	England	1	54	128	5	4	7	5	6	3	4	1	5	6
anonymous	EN	1	England	1	54	107	5	3	6	3	6	6	3	4	6	5
anonymous	EN	1	England	2	58	110	5	5	6	3	6	5	6	3	4	3
anonymous	EN	1	UK	1	69	200	1	5	5	1	6	7	5	2	1	1
anonymous	EN	1	England	2	46	125	2	2	7	2	5	6	7	1	2	3
anonymous	EN	1	UK	1	43	52	5	6	5	3	5	6	5	6	3	6
anonymous	EN	1	UK	2	57	325	6	4	6	3	6	4	7	3	4	3
anonymous	EN	1	Uk	2	55	158	2	3	7	6	5	6	6	4	4	6
anonymous	EN	1	England	2	46	59	1	5	6	2	5	5	6	5	5	5
anonymous	EN	1	United Kingdom	2	50	135	2	1	7	2	6	5	3	1	7	3
anonymous	EN	1	England	1	55	359	1	1	6	4	4	7	6	1	6	4
anonymous	EN	1	Uk	2	43	33	5	4	7	5	7	5	6	2	6	3
anonymous	EN	1	England	1	37	230	5	5	5	2	6	2	5	5	5	4
anonymous	EN	1	England	2	43	55	7	6	7	2	6	1	6	2	7	1
anonymous	EN	1	Wales	1	52	102	6	5	7	2	6	3	5	2	6	2
anonymous	EN	1	England	2	53	333	2	3	7	2	6	2	5	1	6	5
anonymous	EN	1	United Kingdom	2	53	186	1	2	7	6	5	7	6	1	5	2
anonymous	EN	1	UK	1	55	253	6	6	7	5	5	2	5	3	4	4
anonymous	EN	1	England	1	61	326	4	1	7	1	4	3	5	3	7	5
anonymous	EN	1	England	2	46	140	1	4	3	6	6	6	6	6	2	1
anonymous	EN	1	Uk	2	65	78	6	5	7	6	5	5	4	1	6	6
anonymous	EN	1	UK	1	66	205	2	1	6	1	6	6	3	2	7	2
anonymous	EN	1	England	1	63	295	5	2	7	3	7	5	5	2	2	2
anonymous	EN	1	Cornwall	2	58	488	6	6	7	6	7	6	6	4	1	2
anonymous	EN	1	UK	2	58	101	5	1	5	5	5	2	6	6	4	1
anonymous	EN	1	England	2	43	34	6	5	7	2	4	2	4	1	6	4
anonymous	EN	1	England	1	54	1260	6	7	7	6	7	3	7	6	6	2
anonymous	EN	1	United Kingdom	1	47	140	1	2	5	2	3	7	4	2	7	2
anonymous	ZH-S	1	England	1	53	29	5	2	7	1	7	7	7	1	7	1
anonymous	EN	1	ireland	1	51	100	1	1	7	1	4	7	7	1	7	1
anonymous	EN	1	Uk	1	60	103	3	3	5	7	5	5	6	2	4	5
anonymous	EN	1	United Kingdom	1	65	102	6	2	7	2	5	3	6	3	5	1
anonymous	EN	1	England	2	50	150	5	2	7	6	6	6	4	1	5	5
anonymous	EN	1	England	1	56	120	2	2	6	2	5	4	6	2	4	6
anonymous	EN	1	United Kingdom	2	62	86	2	1	7	6	3	6	7	1	6	2
anonymous	EN	1	United Kingdom	1	71	211	6	4	6	2	4	4	5	1	5	4
anonymous	EN	1	Wales	1	58	291	3	4	7	1	6	4	6	1	7	4
anonymous	EN	1	England	1	53	60	2	1	6	3	7	6	6	1	6	5
anonymous	EN	1	Uk	1	51	67	3	1	7	1	6	2	7	1	6	5
anonymous	EN	1	England	2	51	321	6	4	7	4	6	3	7	2	4	4
anonymous	EN	1	England	2	53	9	7	2	7	3	6	1	6	3	6	1
anonymous	EN	1	UK	1	76	288	5	2	7	2	7	5	7	1	6	5
anonymous	EN	1	United Kingdom	2	57	367	6	1	7	2	6	4	6	1	7	5
anonymous	EN	1	UK	2	49	105	3	3	5	4	6	5	4	4	5	5
anonymous	EN	1	United Kingdom	1	57	207	4	3	7	5	5	4	7	2	3	5
anonymous	EN	1	United Kingdom	2	50	154	2	1	6	4	6	7	6	1	7	2
anonymous	EN	1	United Kingdom	2	57	336	2	1	1	3	6	4	7	1	1	4
anonymous	EN	1	England	2	35	6	6	6	5	2	5	2	6	3	5	3
anonymous	EN	1	England	2	54	138	5	1	4	2	6	3	6	1	5	2
anonymous	EN	1	Ireland	1	46	262	7	7	7	1	7	5	7	2	7	1
anonymous	EN	1	Ireland	1	47	92	6	1	6	2	6	4	6	1	6	2
anonymous	EN	1	Australia	2	45	204	7	2	7	5	6	2	7	5	6	2
anonymous	EN	1	Ireland	1	54	103	6	5	6	7	6	7	6	6	2	3
anonymous	EN	1	Ireland	1	60	35	5	3	7	6	4	7	5	2	2	2
anonymous	EN	1	Ireland	1	41	160	7	1	7	1	7	1	7	6	7	3
anonymous	EN	1	Ireland	1	59	82	2	2	6	2	6	5	5	1	7	6
anonymous	EN	1	Northern Ireland	2	38	34	2	1	6	7	5	7	7	2	4	2
anonymous	EN	1	Ireland	1	65	52	7	7	7	1	7	7	7	3	7	6
anonymous	EN	1	Ireland	1	30	54	6	6	7	5	6	4	5	5	4	3
anonymous	EN	1	Ireland	1	49	104	2	2	6	6	2	6	4	1	6	6
anonymous	EN	1	Wales	2	59	62	5	1	6	5	7	5	6	3	5	2
anonymous	EN	1	Ireland	1	56	100	3	5	7	3	7	6	7	1	7	6
anonymous	EN	1	Ireland	2	52	31	4	7	5	1	6	6	6	1	6	4
anonymous	EN	1	Ireland	1	49	27	5	3	5	1	5	3	6	2	7	3
anonymous	EN	1	Ireland	1	57	127	7	3	6	5	7	2	6	5	6	2
anonymous	EN	1	Ireland	1	49	84	4	1	7	4	7	5	4	1	6	1
anonymous	EN	1	Ireland	1	47	4	6	1	7	1	7	4	6	2	7	1
anonymous	EN	1	Ireland	1	58	85	3	3	6	4	5	6	4	2	4	4
anonymous	EN	1	Ireland	1	48	40	3	6	4	2	6	4	4	3	4	6
anonymous	EN	1	Ireland	1	56	28	4	1	3	3	5	3	5	3	4	4
anonymous	EN	1	Ireland	2	48	110	5	5	7	5	7	5	6	4	6	3
anonymous	EN	1	Ireland	1	44	72	4	5	5	3	5	6	7	1	6	7
anonymous	EN	1	Ireland	1	49	18	7	5	7	4	7	2	6	1	2	2
anonymous	EN	1	England	2	45	30	4	1	7	1	7	1	7	1	7	2
anonymous	EN	1	Ireland	2	47	35	7	7	6	7	3	4	7	5	4	4
anonymous	EN	1	Ireland	2	60	26	1	1	7	7	6	6	6	1	5	6
anonymous	EN	1	Ireland	2	55	103	3	1	6	1	6	5	5	1	7	2
anonymous	EN	1	UK	1	68	140	5	2	4	6	5	6	6	3	2	4
anonymous	EN	1	Ireland	2	46	6	6	5	5	5	5	5	5	5	5	5
anonymous	EN	1	Uk	1	62	150	5	6	3	5	5	5	5	4	3	5
anonymous	EN	1	UK	2	60	310	6	5	7	2	3	1	6	1	6	3
anonymous	EN	1	Ireland	2	47	20	4	5	4	2	6	2	4	7	4	3
anonymous	EN	1	Ireland	2	47	4	6	2	5	2	6	3	7	2	6	3
anonymous	EN	1	Ireland	1	49	237	5	5	7	3	6	6	6	2	7	2
anonymous	EN	1	Ireland	2	48	26	6	3	7	2	6	5	7	2	6	6
anonymous	EN	1	Ireland	1	51	51	5	5	6	1	7	4	5	4	7	1
anonymous	EN	1	Ireland	1	57	128	2	1	6	6	5	5	7	5	1	6
anonymous	EN	1	Ireland	1	55	130	4	5	6	5	7	3	5	5	3	3
anonymous	EN	1	Uk	1	53	119	6	3	7	2	6	3	6	1	6	5
anonymous	EN	1	Ireland	1	53	9	3	1	1	5	6	5	6	1	6	2
anonymous	EN	1	Ireland	1	49	190	6	1	7	2	6	1	7	3	7	6
anonymous	EN	1	Ireland	1	58	9	2	1	6	2	6	3	6	1	7	5
anonymous	EN	1	Ireland	2	37	62	5	2	5	4	6	6	7	1	5	1
anonymous	EN	1	Ireland	2	51	35	5	1	6	5	5	5	5	2	6	3
anonymous	EN	1	uk	1	65	109	2	4	6	2	6	6	3	2	5	2
anonymous	EN	1	Ireland	2	50	11	7	6	7	3	7	4	7	1	7	1
anonymous	EN	1	Ireland	1	47	116	1	2	5	2	5	5	6	5	5	3
anonymous	EN	1	Ireland	1	69	127	3	1	7	1	6	6	7	5	6	4
anonymous	EN	1	Ireland	1	60	9	5	4	6	4	6	5	6	2	2	5
anonymous	EN	1	England	2	45	141	3	4	5	5	5	2	5	1	3	1
anonymous	EN	1	Ireland	1	70	405	2	1	6	2	6	6	6	3	6	3
anonymous	EN	1	UK	1	61	232	5	2	7	1	6	3	6	1	6	2
anonymous	EN	1	IRELAND	2	54	25	4	5	6	6	6	6	6	1	5	4
anonymous	EN	1	England	1	65	439	3	1	7	1	5	5	5	1	7	3
anonymous	EN	1	Ireland	2	54	22	4	1	7	1	7	6	6	1	6	3
anonymous	EN	1	England	2	50	313	6	2	6	6	6	3	2	1	5	3
anonymous	EN	1	Wales	2	48	101	2	2	6	5	5	7	6	2	5	3
anonymous	EN	1	Ireland	2	57	6	6	1	7	1	6	4	6	1	6	4
anonymous	EN	1	Ireland	2	36	15	1	6	7	6	6	7	6	2	2	4
anonymous	EN	1	England	2	66	148	5	1	6	2	6	4	6	1	4	3
anonymous	EN	1	Ireland	1	52	560	5	6	5	4	4	6	5	3	4	4
anonymous	EN	1	Ireland	2	56	14	6	1	7	1	7	1	7	1	7	1
anonymous	EN	1	United Kingdom	2	50	205	1	3	4	6	4	7	5	5	2	5
anonymous	EN	1	Ireland	1	43	45	4	5	6	5	6	3	6	3	6	3
anonymous	EN	1	ireland	1	57	101	5	6	7	2	6	2	2	4	2	6
anonymous	EN	1	Uk	1	59	237	4	5	6	5	6	2	6	2	6	2
anonymous	EN	1	Ireland	2	52	12	6	2	6	2	6	6	7	2	2	2
anonymous	EN	1	England	1	44	158	6	5	7	1	6	6	6	2	6	1
anonymous	EN	1	Ireland	2	52	2	1	1	5	4	6	6	6	1	5	1
anonymous	EN	1	Ireland	2	61	107	5	1	1	7	6	7	6	1	5	3
anonymous	EN	1	Ireland	1	67	98	4	3	2	1	7	2	5	1	7	1
anonymous	EN	1	Ireland	2	57	108	5	1	6	1	6	5	5	1	6	5
anonymous	EN	1	Cork	1	50	65	5	5	7	3	5	6	6	1	7	5
anonymous	EN	1	England	1	57	204	7	6	7	3	7	3	2	1	4	2
anonymous	EN	1	Ireland	1	44	50	4	4	3	7	6	2	6	4	7	6
anonymous	EN	1	Ireland	1	56	130	3	4	2	2	5	4	5	6	6	2
anonymous	EN	1	Ireland	1	55	3	1	2	7	7	6	7	6	2	2	6
anonymous	EN	1	Ireland	1	46	62	5	3	5	2	5	5	6	2	6	5
anonymous	EN	1	Ireland	1	56	72	5	6	5	4	6	5	6	4	5	2
anonymous	EN	1	Ireland	2	47	80	6	2	7	1	7	2	7	1	7	1
anonymous	EN	1	Switzerland	1	38	80	4	6	6	4	7	7	2	5	7	1
anonymous	EN	1	United Kingdom	1	51	327	2	2	3	1	6	6	6	4	7	4
anonymous	EN	1	Ireland	2	49	20	4	1	7	2	6	4	7	2	6	3
anonymous	SV	1	Sverige	1	54	51	2	1	6	3	6	6	3	1	3	4
anonymous	EN	1	Ireland	2	39	24	2	1	6	5	5	3	7	1	4	4
anonymous	EN	1	England	1	45	192	2	6	7	2	7	5	6	2	6	2
anonymous	EN	1	Ireland	1	54	28	6	2	7	4	7	2	7	2	6	2
anonymous	EN	1	Ireland	1	62	205	1	4	6	6	6	6	6	1	3	3
anonymous	EN	1	USA	1	74	825	7	4	7	3	5	1	5	1	5	2
anonymous	EN	1	United States	1	64	205	6	4	6	2	7	4	6	1	5	2
anonymous	DA	1	Denmark	1	56	863	6	1	7	1	7	4	6	1	6	1
anonymous	EN	1	England	3	58	405	1	2	6	2	6	6	3	7	7	2
preview	EN	1	Ireland	1	59	222	4	4	4	4	4	4	4	4	4	4
anonymous	EN	1	United States	1	65	184	3	3	6	5	7	3	6	3	4	2
anonymous	NO	1	Norway	1	63	54	2	5	2	6	5	6	5	5	5	4
anonymous	EN	1	Ireland	2	63	10	5	3	7	6	6	5	5	1	3	2
anonymous	EN	1	Ireland	1	61	202	4	1	5	1	6	6	6	1	7	4
anonymous	EN	1	Sweden	2	56	49	2	1	5	4	5	6	5	1	5	6
anonymous	EN	1	Australia	2	70	365	7	1	7	1	4	4	4	1	7	5
anonymous	EN	1	Ireland	2	50	21	3	1	7	3	5	4	6	2	5	4
anonymous	EN	1	England	1	36	6	6	5	7	3	6	1	5	1	5	3
anonymous	EN	1	England	2	68	2	3	1	7	2	6	2	7	2	6	2
anonymous	EN	1	England	1	57	94	4	3	5	5	6	3	4	2	4	6
anonymous	EN	1	UK	1	67	38	2	3	6	2	6	6	5	2	6	3
anonymous	EN	1	England	1	42	40	2	1	7	4	5	6	5	1	7	2
anonymous	EN	1	England	2	57	183	2	6	7	3	5	6	5	1	6	6
anonymous	EN	1	Uk	2	53	20	6	1	7	7	1	4	6	1	3	4
anonymous	EN	1	Scotland	1	53	93	3	4	6	5	6	6	6	2	5	4
anonymous	EN	1	England	1	55	238	5	3	7	2	5	6	2	1	6	6
anonymous	EN	1	UK	2	49	12	5	1	7	6	5	6	7	1	6	2
anonymous	EN	1	England	1	39	77	6	5	7	1	6	6	5	1	7	5
anonymous	EN	1	England	1	66	28	3	2	6	2	6	5	6	2	6	2
anonymous	EN	1	England	2	43	6	4	1	7	1	4	5	5	3	7	6
anonymous	EN	1	Ireland	1	54	274	3	3	6	3	4	5	5	3	5	4
anonymous	EN	1	England	2	45	39	2	2	6	5	4	7	5	2	5	6
anonymous	EN	1	UK	2	61	206	5	7	5	7	6	5	6	5	1	7
anonymous	EN	1	England	1	53	100	1	2	7	6	3	5	6	1	5	5
anonymous	EN	1	UK	2	59	200	5	3	5	2	5	7	6	3	6	4
anonymous	EN	1	UK	1	64	18	1	1	7	1	7	6	6	1	7	1
anonymous	EN	1	Canada	2	50	58	2	4	5	6	5	7	5	5	2	1
anonymous	EN	1	Ireland	1	52	5	4	4	5	4	5	3	4	3	5	3
anonymous	EN	1	England	1	52	325	7	4	6	1	7	1	5	1	7	1
anonymous	EN	1	United Kingdom	1	41	40	2	5	5	1	3	3	3	2	5	3
anonymous	EN	1	England	2	66	430	1	1	6	7	5	5	6	3	6	4
anonymous	EN	1	UK	1	36	9	6	5	3	6	7	3	7	7	3	6
anonymous	EN	1	Uk	1	56	268	5	3	3	2	4	2	4	4	5	3
anonymous	EN	1	United Kingdom	1	65	51	2	1	6	2	7	6	5	2	6	5
anonymous	EN	1	Switzerland	2	56	70	6	7	7	7	6	4	7	3	3	4
anonymous	EN	1	England	2	26	2	7	6	7	3	5	1	6	1	6	6
anonymous	EN	1	Australia	1	65	106	5	4	5	4	6	4	6	4	4	2
anonymous	EN	1	Australia	1	60	267	7	5	7	6	5	1	6	2	6	5
preview	DE	1	Deutschland	1	58	982	6	3	6	2	6	2	2	1	7	2
anonymous	PT-BR	1	BRASIL	2	52	2	6	6	6	5	6	1	6	1	6	1
anonymous	PT-BR	1	Brasil	1	45	50	6	1	6	3	6	1	6	1	6	1
anonymous	PT-BR	1	Brasil	1	47	1	7	1	7	2	7	1	7	1	5	2
anonymous	PT-BR	1	Brasil	1	52	8	3	4	1	5	3	6	4	1	3	4
anonymous	PT-BR	1	Brasil	2	42	11	5	4	7	4	5	5	4	1	4	4
anonymous	PT-BR	1	Brasil	1	32	3	4	2	5	3	5	3	5	3	5	3
anonymous	PT-BR	1	Brasil	2	60	10	6	1	7	1	6	5	7	1	7	3
preview	DE	1	Deutschland	2	60	342	5	1	6	1	6	2	6	1	6	1
anonymous	PT-BR	1	Brasil	2	60	1	3	1	6	6	5	3	6	1	7	1
preview	DE	1	Deutschland	2	44	367	6	2	7	3	6	5	6	1	6	2
anonymous	PT	1	Brasil	1	70	6	5	4	6	5	6	6	6	2	6	2
anonymous	PT-BR	1	Brasil	2	55	7	6	3	6	1	6	1	6	1	3	1
anonymous	PT-BR	1	Brasil	1	45	6	7	2	7	2	7	3	7	1	6	1
anonymous	PT-BR	1	Brasil	1	42	1	5	1	5	1	5	7	5	1	7	5
anonymous	PT-BR	1	Brasil	1	33	2	7	4	7	5	5	1	7	1	4	3
anonymous	PT-BR	1	Brasil	1	38	7	6	2	6	1	5	5	6	3	6	5
anonymous	EN	1	Mexico	2	40	7	6	4	5	7	7	4	5	3	5	2
preview	DE	1	Deutschland	1	63	726	3	1	6	2	6	6	6	1	6	1
anonymous	PT-BR	1	Brasil	1	45	2	3	1	3	3	5	5	5	2	2	3
anonymous	EN	1	Ireland	1	69	8	6	2	6	2	6	2	6	3	5	2
anonymous	PT-BR	1	Brasil	1	62	8	6	2	6	2	6	1	6	2	2	2
anonymous	EN	1	Ireland	1	46	9	4	4	5	4	5	2	3	4	3	4
anonymous	EN	1	England	1	37	2	5	2	6	7	7	5	7	2	3	4
preview	DE	1	Deutschland	1	57	300	1	2	7	1	6	4	2	1	7	4
anonymous	EN	1	Wales	1	50	3	6	6	6	3	6	2	6	1	5	2
anonymous	PT-BR	1	Brasil	1	49	28	6	7	6	3	5	1	7	1	6	1
anonymous	PT-BR	1	Brasil	1	51	2	6	2	7	5	2	1	7	6	2	2
anonymous	PT-BR	1	Brasil	1	43	3	5	3	7	4	7	4	5	5	3	2
preview	DE	1	Deutschland	1	53	182	5	5	6	5	4	3	6	1	6	3
preview	DE	1	Deutschland	2	60	760	6	3	3	6	6	3	6	1	2	2
anonymous	EN	1	Australia	2	77	16	6	1	6	3	7	2	7	2	2	2
preview	DE	1	Deutschland	1	67	1060	4	3	7	2	2	4	2	3	4	3
anonymous	EN	1	England	2	66.5	232	4	1	7	1	7	4	7	1	7	1
anonymous	EN	1	Northern Ireland	1	60	150	2	2	7	4	5	7	6	2	6	6
anonymous	DE	1	Deutschland	1	65	492	4	5	4	5	6	2	5	3	2	2
anonymous	EN	1	Finland	1	45	256	5	3	7	2	6	2	6	2	7	2
anonymous	DE	1	Deutschland	1	55	963	5	6	4	4	7	1	4	4	2	5
anonymous	PT	1	Brasil	2	46	1	5	4	6	6	5	2	5	2	4	3
anonymous	EN	1	Finland	1	55	171	6	3	6	2	5	5	6	2	6	2
anonymous	EN	1	England	2	54	1	7	7	7	7	6	2	6	7	3	1
anonymous	EN	1	Finland	1	44	421	6	5	6	5	3	6	6	1	6	3
anonymous	FI	1	Suomi	1	66	331	3	4	6	3	6	5	6	2	6	3
anonymous	EN	1	Finland	2	44	72	6	3	7	1	6	1	7	3	7	3
anonymous	FI	1	Suomi	2	62	320	6	5	6	1	6	2	6	3	5	2
anonymous	EN	1	Finland	2	41	35	6	4	6	5	7	6	6	2	6	3
anonymous	EN	1	Ireland	1	62	100	4	2	6	3	6	7	7	2	7	6
anonymous	FI	1	Suomessa	1	59	135	3	1	6	1	5	3	5	3	7	5
anonymous	EN	1	USA	2	72	358	3	4	6	6	7	3	6	2	5	2
anonymous	EN	1	Germany	2	58	298	3	2	7	1	6	5	7	5	3	2
anonymous	FI	1	Finland	2	57	405	6	3	5	2	6	2	5	3	6	4
anonymous	EN	1	Australia	1	69	120	2	4	6	2	5	7	5	4	6	4
anonymous	PT-BR	1	Brasil	1	46	17	1	2	1	5	2	7	5	5	3	1
anonymous	DE	1	Deutschland	1	69	749	6	2	7	7	7	6	5	1	6	1
anonymous	EN	1	England	1	56	354	1	1	5	5	7	6	6	2	7	1
anonymous	DE	1	germany	1	68	654	4	4	5	3	6	5	5	3	5	3
anonymous	EN	1	Ireland	1	66	719	4	4	4	4	4	4	4	4	4	4
anonymous	EN	1	Scotland	2	49	91	2	2	6	5	6	5	6	2	6	4
anonymous	PT-BR	1	Brasil	1	68	41	5	2	7	3	7	6	6	2	6	2
anonymous	EN	1	Australia	1	70	157	1	7	7	3	7	6	6	2	7	1
anonymous	FI	1	Finland	2	46	114	3	4	6	3	5	4	6	2	6	3
anonymous	EN	1	Germany	1	54	150	1	1	7	4	7	4	1	7	2	3
anonymous	DE	1	Deutschland	2	56	70	5	4	7	3	7	4	6	1	5	1
anonymous	EN	1	UK	2	31	3	4	4	7	3	7	6	7	1	5	6
anonymous	EN	1	Ireland	2	49	82	6	2	7	4	6	7	7	1	7	6
anonymous	FI	1	Finland	1	70	1087	1	2	6	1	6	7	7	2	7	2
anonymous	FI	1	Suomi	1	53	96	4	6	6	1	6	2	6	2	6	4
anonymous	FI	1	Suomi	2	56	526	6	1	6	1	7	2	5	5	6	6
anonymous	PT-BR	1	Brasil	1	45	17	5	2	6	6	6	6	7	5	3	3
anonymous	EL	1	Greece	1	44	200	2	1	6	7	6	5	4	2	1	1
anonymous	DE	1	Deutschland	1	49	189	1	7	6	7	7	6	7	4	3	7
anonymous	EN	1	Uk	1	44	56	1	1	1	1	1	1	1	1	1	7
anonymous	EN	1	Uk	1	56	103	1	4	4	3	6	5	6	2	3	2
anonymous	EN	1	United Kingdom	1	59	368	2	4	6	4	5	6	5	2	6	3
anonymous	DE	1	Deutschland	1	49	83	6	4	6	1	6	2	5	1	5	2
anonymous	DE	1	Deutschland	1	29	15	4	5	6	1	5	6	6	1	5	3
anonymous	ET	1	Eesti	1	51	130	4	1	7	2	5	6	7	1	7	4
anonymous	EN	1	Ireland	2	52	115	7	5	6	6	5	1	7	3	4	1
anonymous	EN	1	Northern Ireland	1	58	105	3	1	5	3	4	7	5	2	5	7
anonymous	EN	1	England	2	56	155	4	1	7	5	7	4	6	2	2	1
anonymous	EN	1	Ireland	2	56	85	3	5	7	2	7	3	7	7	6	3
anonymous	EN	1	Ireland	1	62	19	2	4	6	1	6	6	5	1	6	2
anonymous	EN	1	Ireland	2	79	299	2	4	6	5	6	7	6	1	7	4
anonymous	EN	1	Ireland	1	52	34	4	3	6	3	4	5	6	2	5	5
anonymous	EN	1	UK England	1	76	333	7	1	7	1	7	1	7	1	7	1
anonymous	ET	1	Eesti	2	45	7	6	1	7	2	7	1	6	5	6	4
anonymous	ET	1	estonia	2	58	110	4	3	5	3	4	3	5	2	4	4
anonymous	EN	1	United Kingdom	2	56	112	6	6	6	6	6	3	6	2	6	6
anonymous	EN	1	England	1	71	104	2	2	6	2	6	6	5	3	5	4
anonymous	EN	1	England	1	61	160	3	4	3	4	5	5	5	4	5	5
anonymous	DE	1	Germany	1	45	243	2	6	7	4	5	7	5	2	4	4
anonymous	FR	1	France	1	62	766	4	4	4	4	4	5	5	1	3	4
anonymous	FR	1	France	2	58	540	4	4	4	1	4	6	6	5	4	4
anonymous	FR	1	FRANCE	1	64	230	5	1	6	5	5	6	6	2	6	4
anonymous	EN	1	Ireland	1	50	250	6	2	6	1	6	4	6	3	7	2
anonymous	FR	1	France	1	66	109	6	3	6	4	5	6	6	2	6	6
anonymous	FR	1	France	2	42	30	7	3	6	2	4	3	1	1	3	1
anonymous	ET	1	eesti	1	42	70	3	1	7	5	7	6	7	2	5	3
anonymous	EN	1	England	1	68	1502	4	5	4	5	5	7	6	1	5	5
anonymous	FR	1	France	1	56	64	6	3	6	2	6	6	4	3	6	3
anonymous	IT	1	Italia	1	52	18	5	2	6	2	5	5	5	6	5	4
anonymous	IT	1	Italia	2	48	22	6	1	6	2	7	4	6	7	7	5
anonymous	IT	1	Italia	2	51	65	4	5	6	6	6	4	6	6	6	6
anonymous	IT	1	Italia	1	59	23	4	5	5	4	6	2	4	5	3	3
anonymous	IT	1	Italia	1	54	2	5	3	7	2	6	3	7	6	6	6
anonymous	IT	1	Italia	1	60	68	1	1	1	1	7	5	7	7	7	7
anonymous	IT	1	Italia	1	60	33	4	1	7	4	6	5	4	5	6	5
anonymous	IT	1	ITALIA	1	67	240	5	1	6	3	6	5	6	6	6	5
anonymous	IT	1	Italia	1	49	70	4	4	6	4	6	4	4	4	5	7
anonymous	IT	1	Italia	1	64	93	5	2	5	2	6	3	5	6	6	6
anonymous	IT	1	italia	1	73	205	6	6	6	2	6	3	6	6	6	6
anonymous	IT	1	Italia	2	54	74	7	1	7	2	7	5	6	6	7	7
anonymous	IT	1	Italia	1	46	92	3	2	7	2	6	6	5	6	6	3
anonymous	IT	1	Italia	1	59	74	1	1	6	1	5	2	3	3	3	2
anonymous	FR	1	France	1	65	181	5	2	6	3	6	6	6	1	6	2
anonymous	IT	1	Italia	1	33	5	3	1	6	1	4	6	4	5	7	7
anonymous	FR	1	France	2	44	52	6	1	6	6	6	6	5	3	6	5
anonymous	FR	1	France	1	55	284	1	2	1	2	1	1	2	2	1	2
anonymous	FR	1	France	2	65	14	1	1	6	4	6	5	7	1	5	5
anonymous	IT	1	Italy	1	49	67	5	2	6	3	6	4	5	3	6	5
anonymous	IT	1	Italia	1	66	290	6	2	6	2	6	6	6	5	6	6
anonymous	IT	1	Italia	2	66	270	6	2	6	1	7	6	6	5	6	6
anonymous	IT	1	Imola	1	66	226	4	2	4	1	6	2	6	6	6	6
anonymous	IT	1	Italia	2	42	35	6	3	6	2	5	3	6	3	6	5
anonymous	IT	1	Italia	2	42	53	2	2	6	1	7	6	4	4	5	4
anonymous	IT	1	Italia	1	58	239	6	2	6	2	6	2	5	4	4	4
anonymous	IT	1	italia	1	52	162	3	1	2	3	3	3	3	4	3	3
anonymous	IT	1	Italia	1	49	55	5	2	6	5	7	5	6	5	5	5
anonymous	IT	1	Italia	1	49	27	2	1	6	2	2	6	4	5	6	5
anonymous	IT	1	Italia	2	50	46	3	2	7	3	7	6	7	7	7	4
anonymous	EN	1	Uk	2	43	671	6	5	3	2	6	2	2	1	5	1
anonymous	EN	1	England	2	32	200	3	6	6	5	6	5	7	1	3	3
anonymous	EN	1	Ireland	1	68	223	6	4	7	1	7	6	7	1	7	1
anonymous	EN	1	Ireland	2	36	7	6	4	6	3	6	4	6	3	6	4
anonymous	EN	1	Ireland	2	61	250	6	4	7	7	6	3	6	1	1	7
anonymous	EN	1	Uk	1	60	346	7	2	7	5	7	6	7	1	4	4
anonymous	EN	1	Northern Ireland	2	60	143	3	1	7	1	6	7	4	5	7	7
anonymous	EN	1	Ireland	2	37	65	5	3	3	4	5	5	6	2	5	1
anonymous	IT	1	Italia	1	56	672	6	1	6	5	6	6	6	6	6	6
anonymous	EN	1	England	1	61	437	3	1	7	2	5	6	6	5	6	3
anonymous	EN	1	Northern Ireland	1	60	223	7	6	1	4	2	6	2	7	7	5
anonymous	EN	1	UK	1	52	332	3	3	7	4	5	5	4	1	5	4
anonymous	EN	1	England	2	26	337	5	7	4	6	7	4	6	4	2	2
anonymous	DE	1	Deutschland	1	40	20	3	3	6	2	5	4	4	1	5	3
anonymous	DE	1	D	1	58	270	5	5	7	1	5	2	3	1	3	4
anonymous	EN	1	Ireland	2	66	264	7	1	7	6	7	1	7	1	6	2
anonymous	EN	1	United Kingdom	2	62	315	2	2	7	1	7	6	7	1	7	2
anonymous	EN	1	Ireland	1	45	11	5	1	7	1	7	6	5	3	7	2
anonymous	EN	1	United Kingdom	2	67	408	7	5	7	1	6	2	6	1	7	2
anonymous	EN	1	England	2	75	227	7	1	7	4	7	1	7	1	7	1
anonymous	EN	1	Ireland	1	50	15	7	2	6	1	7	4	7	3	7	1
anonymous	DE	1	Deutschland	1	54	908	7	4	6	5	7	1	7	4	4	3
anonymous	EN	1	UK	2	78	617	4	1	5	5	6	5	7	1	7	4
anonymous	EN	1	Ireland	1	61	84	6	5	7	1	6	1	4	1	5	1
anonymous	IT	1	Italia	1	64	61	5	1	7	2	7	4	6	6	7	3
anonymous	EN	1	Ireland	2	63	1	4	4	5	3	6	5	7	1	6	2
anonymous	EN	1	ireland	1	54	114	6	2	6	2	6	2	5	6	5	3
anonymous	EN	1	United Kingdom	2	68	120	5	1	7	5	6	5	7	1	6	3
anonymous	EN	1	Ireland	2	47	44	2	6	7	5	3	6	5	1	5	6
anonymous	EN	1	Ireland	1	51	5	3	6	5	5	6	5	5	5	5	4
anonymous	EN	1	ireland	2	79	301	4	1	6	4	7	6	6	1	4	4
anonymous	EN	1	Ireland	2	41	39	6	2	7	2	5	2	6	2	6	3
anonymous	EN	1	United Kingdom	1	52	333	3	5	7	5	6	5	4	1	5	4
anonymous	EN	1	Ireland	2	49	18	6	1	7	2	6	5	7	1	7	2
anonymous	EN	1	Singapore	2	48	45	2	1	7	7	6	7	7	1	2	2
anonymous	EN	1	United States	1	65	3	1	2	7	2	6	5	7	2	7	1
anonymous	EN	1	Ireland	1	61	5	2	4	5	2	6	5	5	1	6	3
anonymous	DE	1	Österreich	1	62	31	5	2	7	1	5	3	5	1	6	2
anonymous	EN	1	Northern Ireland	1	66	14	4	4	6	4	6	5	6	4	6	5
anonymous	EN	1	Scotland	1	76	20	6	1	2	1	1	2	6	5	3	2
anonymous	EN	1	USA	1	64	6	3	3	6	2	6	6	6	5	6	6
anonymous	EN	1	Canada	2	60	13	7	5	7	1	7	1	7	1	6	4
anonymous	EN	1	Brazil	2	64	3	7	2	4	2	5	1	6	5	3	1
anonymous	EN	1	Austria	2	60	10	3	1	7	2	7	5	4	2	5	1
anonymous	EN	1	US	2	69	20	2	4	7	5	6	7	5	1	7	4
anonymous	EN	1	United States	2	65	12	1	1	7	4	5	7	2	2	4	2
anonymous	EN	1	USA	2	66	144	4	5	7	3	7	5	6	4	5	3
anonymous	EN	1	UK	1	60	5	1	5	7	1	7	6	6	1	7	5
anonymous	EN	1	United States	1	62	26	5	3	7	2	6	6	6	3	6	5
anonymous	EN	1	UK	2	70	5	1	1	7	2	6	5	6	1	7	2
anonymous	EN	1	USA	1	63	20	6	5	7	2	6	4	7	2	7	5
anonymous	EN	1	United States	1	57	110	2	5	6	5	7	5	5	6	3	6
anonymous	EN	1	United States	2	62	10	2	1	7	1	6	7	6	1	6	2
anonymous	EN	1	United States	1	66	11	5	5	6	1	5	5	5	2	7	2
anonymous	EN	1	United Kingdom	1	58	86	2	1	4	1	6	5	5	3	6	5
anonymous	EN	1	Ireland	2	51	130	2	5	6	2	7	6	4	4	5	2
anonymous	EN	1	Ireland	2	26	2	6	3	6	2	5	3	5	2	7	3
anonymous	EN	1	Ireland	2	59	13	5	1	7	5	3	1	5	2	5	6
anonymous	EN	1	Ireland	1	54	25	3	1	6	2	5	3	4	2	6	4
anonymous	EN	1	England	2	60	14	5	1	6	1	7	5	7	1	7	4
anonymous	EN	1	England	2	50	135	1	1	7	2	5	5	4	1	7	2
anonymous	PT-BR	1	Brasil	1	55	6	1	5	6	4	3	6	3	1	3	5
anonymous	PT-BR	1	Brasil	1	56	40	5	1	6	1	5	2	6	2	5	2
anonymous	FR	1	France	1	46	50	6	2	6	4	6	6	2	2	6	4
anonymous	IT	1	Italia	1	39	3	6	3	7	6	6	5	5	7	4	5
anonymous	IT	1	italia	1	51	2	6	2	5	3	5	3	5	4	5	3
anonymous	IT	1	Italia	1	48	290	6	2	6	4	6	3	6	6	6	4
anonymous	EN	1	England	1	33	17	7	5	6	3	3	1	5	1	6	6
anonymous	EN	1	Ireland	2	48	12	4	3	3	3	3	2	5	6	3	3
anonymous	EN	1	Wales	2	69	29	2	6	7	7	6	7	6	2	6	5
anonymous	EN	1	ireland	1	33	2	3	4	6	5	7	7	1	1	5	6
anonymous	PT-BR	1	Brasil	1	49	41	7	1	7	1	7	5	7	5	7	1
anonymous	PT-BR	1	Brasil	1	46	18	5	2	6	1	6	1	6	1	4	3
anonymous	PT-BR	1	Brasil	1	66	26	6	1	7	2	7	5	6	1	6	2
anonymous	PT-BR	1	Brasil	2	48	12	7	3	6	2	4	3	7	1	7	3
anonymous	PT-BR	1	brazil	2	45	4	6	2	5	2	6	2	5	2	2	2
anonymous	PT-BR	1	Brasil	1	48	10	7	4	7	7	4	6	7	3	1	6
anonymous	PT-BR	1	Brasil	2	40	4	7	2	5	4	7	1	7	1	4	1
anonymous	PT-BR	1	Brasil	1	53	91	7	5	7	4	6	5	7	2	4	1
anonymous	PT-BR	1	Brasil	2	47	22	7	5	6	3	6	1	7	1	4	1
anonymous	PT-BR	1	Brasil	1	55	83	7	2	7	2	7	3	7	5	7	3
anonymous	PT-BR	1	Brazil	1	52	8	2	3	7	3	3	7	6	1	3	4
anonymous	PT-BR	1	Brasil	1	61	6	7	5	7	5	6	2	7	5	3	1
anonymous	PT-BR	1	Brasil	2	51	10	6	4	6	3	6	6	6	1	6	1
anonymous	PT-BR	1	Brasil	2	54	56	7	3	7	5	7	6	3	1	3	1
anonymous	PT-BR	1	Brasil	1	54	18	7	3	5	2	6	5	7	5	2	3
anonymous	EN	1	Brazil	1	45	18	6	6	7	3	7	2	7	1	7	2
anonymous	PT-BR	1	brasil	1	49	19	5	6	6	6	6	6	3	1	3	1
anonymous	PT-BR	1	Brasil	2	47	6	6	1	7	2	5	6	6	6	6	5
anonymous	PT-BR	1	Brazil	1	43	43	6	5	7	4	6	2	6	4	4	1
anonymous	PT-BR	1	Brasil	1	61	70	6	5	7	1	6	5	7	5	6	3
anonymous	PT-BR	1	Brasil	1	56	221	5	3	6	2	7	5	6	2	5	2
anonymous	PT-BR	1	Brazil	1	42	10	7	7	7	1	7	7	7	1	6	3
anonymous	PT-BR	1	Brasil	1	35	1	5	1	5	3	5	5	6	2	4	3
anonymous	PT-BR	1	Brasil	1	51	101	5	2	6	1	5	6	6	1	2	2
anonymous	PT-BR	1	Brasil	2	42	2	5	3	7	5	6	1	7	2	3	5
anonymous	PT-BR	1	Brasil	1	43	95	7	5	7	2	6	5	5	1	5	2
anonymous	PT-BR	1	Brasil	1	44	21	7	2	7	2	6	1	6	5	3	2
anonymous	PT-BR	1	Brasil	2	50	35	7	5	7	2	7	1	7	2	6	1
anonymous	PT-BR	1	Brasil	2	44	7	3	7	6	7	6	3	6	6	2	2
anonymous	PT-BR	1	Brasil	1	31	25	6	2	6	4	7	4	6	3	4	2
anonymous	PT-BR	1	Brasil	1	64	50	6	2	5	1	6	6	6	1	7	1
anonymous	PT-BR	1	Brasil	2	49	40	7	4	6	5	7	6	6	1	4	1
anonymous	PT-BR	1	Brasil	1	48	1	6	2	6	2	7	3	6	5	7	2
anonymous	PT-BR	1	Brasil	1	38	29	5	3	7	5	6	5	5	3	5	1
anonymous	PT-BR	1	Brasil	1	38	5	6	2	6	1	5	1	6	5	4	2
anonymous	PT-BR	1	Brasil	1	47	8	7	2	7	3	7	7	7	2	6	1
anonymous	PT-BR	1	Brasil	1	47	2	7	1	1	3	5	4	7	1	5	1
anonymous	PT-BR	1	Brasil	1	38	2	6	3	6	4	6	4	6	4	5	1
anonymous	PT-BR	1	Brasil	1	44	12	7	7	7	1	7	1	7	1	7	6
anonymous	PT-BR	1	Brazil	1	61	30	6	2	7	2	6	5	6	2	6	4
anonymous	PT-BR	1	Brazil	1	57	80	5	3	6	6	6	7	5	2	6	5
anonymous	PT-BR	1	Brasil	2	64	34	5	6	7	3	6	5	6	2	3	2
anonymous	PT-BR	1	Brazil	1	44	11	2	1	6	3	5	7	5	3	7	6
anonymous	PT-BR	1	Brasil	2	63	30	7	5	7	1	6	3	7	4	6	2
anonymous	PT-BR	1	Brasil	2	38	8	6	3	7	3	5	5	6	1	5	1
anonymous	PT-BR	1	Brasil	2	53	2	5	2	5	4	6	2	6	5	6	4
anonymous	PT-BR	1	Brazil	2	47	6	5	3	6	5	7	4	7	1	4	3
anonymous	PT-BR	1	Brasil	1	52	29	7	1	7	1	5	3	7	4	7	2
anonymous	PT	1	Brasil	2	37	10	7	1	5	6	7	1	6	5	5	4
anonymous	PT-BR	1	Brasil	1	43	3	2	1	5	4	5	6	5	5	5	5
anonymous	PT-BR	1	Brasil	2	42	20	7	1	7	2	6	2	7	2	6	2
anonymous	PT-BR	1	Brasil	1	50	4	7	2	7	2	7	5	7	3	7	1
anonymous	PT-BR	1	brasil	1	57	30	6	1	6	1	5	5	6	1	6	6
anonymous	PT-BR	1	Brasil	2	45	15	7	3	3	2	7	7	7	1	4	1
anonymous	PT-BR	1	Brasil	1	47	7	6	1	7	5	7	5	7	1	5	1
anonymous	PT-BR	1	Brasil	1	53	30	6	1	7	2	6	2	5	2	7	4
anonymous	PT-BR	1	Brasil	2	57	12	7	5	7	2	7	5	7	1	5	1
anonymous	EN	1	Ireland	2	31	10	6	4	5	5	6	5	7	7	5	4
anonymous	DE	1	Österreich	1	65	258	5	1	6	1	7	4	5	1	6	2
anonymous	EN	1	Ireland	2	56	113	7	1	7	1	7	1	7	1	6	1
anonymous	DE	1	Österreich	1	52	300	6	1	6	1	6	2	6	1	6	2
anonymous	EN	1	UK	2	46	10	6	2	7	5	6	5	6	1	6	4
anonymous	EN	1	UK	2	61	207	5	6	5	7	6	4	5	5	2	4
anonymous	EN	1	UK	2	59	693	4	2	6	6	5	6	6	6	5	5
anonymous	EN	1	England	2	49	7	5	2	6	3	6	6	7	5	6	5
anonymous	EN	1	England	1	27	265	7	3	7	2	5	4	6	1	5	2
anonymous	PT-BR	1	Brasil	1	57	3	3	1	6	3	6	5	6	2	5	2
anonymous	EN	1	England	1	56	25	3	2	5	5	5	5	5	1	4	5
anonymous	EN	1	Ireland	1	71	412	2	1	6	2	6	6	6	2	6	2
anonymous	EN	1	Ireland	1	31	60	6	2	7	5	6	3	4	4	6	1
anonymous	EN	1	Ireland	2	63	52	7	1	7	1	7	1	7	1	7	4
anonymous	EN	1	USA	2	69	52	5	3	7	2	7	7	3	5	7	7
anonymous	EN	1	USA	2	61	17	5	1	6	3	7	5	5	1	6	1
anonymous	EN	1	USA	1	69	351	2	3	6	2	6	6	5	5	6	4
anonymous	EN	1	USA	1	70	150	2	1	7	1	6	6	5	4	7	2
anonymous	EN	1	USA	2	66	13	4	4	7	2	4	6	7	1	5	4
anonymous	EN	1	USA	2	62	469	5	5	7	2	6	2	3	1	6	3
anonymous	EN	1	USA	2	69	5	4	1	7	2	6	5	7	1	6	2
anonymous	EN	1	UK	2	49	85	2	4	6	4	7	6	7	5	5	1
anonymous	EN	1	Ireland	2	52	117	5	3	7	5	5	2	7	2	6	3
anonymous	EN	1	USA	1	68	70	7	3	7	2	7	2	7	1	7	1
anonymous	EN	1	USA	2	70	21	3	1	7	4	5	6	7	5	4	3
anonymous	EN	1	USA	2	61	4	3	1	7	1	6	5	6	2	7	7
anonymous	EN	1	USA	2	64	63	3	5	6	5	6	6	6	1	5	1
anonymous	EN	1	Austria	2	47	6	4	2	6	3	4	3	5	1	3	5
anonymous	EN	1	USA	2	70	21	3	1	7	2	6	7	7	2	6	2
anonymous	EN	1	USA	2	70	3	7	1	7	5	7	1	7	6	5	1
anonymous	EN	1	USA	2	58	6	2	3	7	1	6	5	7	1	7	5
anonymous	EN	1	United States	2	71	50	7	4	7	4	7	1	7	1	6	1
anonymous	EN	1	USA	2	75	100	6	1	7	1	7	2	7	1	7	3
anonymous	EN	1	USA	1	51	14	3	2	5	2	5	2	6	2	5	2
anonymous	EN	1	USA	2	77	30	4	4	7	4	5	4	7	4	4	2
anonymous	EN	1	America	2	70	28	7	4	7	4	7	2	6	1	7	1
anonymous	EN	1	USA	1	69	1064	4	1	7	1	7	5	6	1	7	4
anonymous	EN	1	United States	2	70	10	2	4	5	4	5	4	5	5	4	2
anonymous	EN	1	United States	2	79	296	5	1	7	2	6	4	6	1	7	2
anonymous	EN	1	England	2	64	215	3	2	5	4	6	4	7	4	5	3
anonymous	EN	1	England	2	66	465	4	1	7	7	5	7	6	1	4	2
anonymous	EN	1	UK	2	33	117	6	5	2	5	6	2	4	7	3	3
anonymous	EN	1	USA	2	64	50	6	3	6	2	6	3	6	2	6	5
anonymous	EN	1	USA	2	75	152	5	1	7	2	6	2	7	1	6	1
anonymous	EN	1	usa	2	73	30	5	2	4	3	5	5	6	4	4	5
anonymous	EN	1	Usa	2	67	103	3	1	7	3	5	5	7	1	7	4
anonymous	EN	1	Wales	2	65	7	4	5	5	2	5	4	4	5	4	3
anonymous	EN	1	UK	2	41	24	5	2	5	3	6	5	5	3	5	4
anonymous	EN	1	uk	2	62	206	6	5	7	5	7	7	7	1	4	1
anonymous	EN	1	US	2	57	36	5	4	5	2	6	3	6	4	6	1
anonymous	EN	1	IRELAND	1	54	103	6	5	6	2	5	3	6	2	6	3
anonymous	EN	1	Ireland	1	45	29	3	5	7	3	5	3	5	2	6	3
anonymous	EN	1	England	2	58	508	6	3	1	7	7	5	5	3	1	1
anonymous	EN	1	usa	2	72	572	2	1	7	2	6	3	3	1	4	2
anonymous	EN	1	Portugal	2	37	9	7	6	6	5	7	1	6	2	3	2
anonymous	EN	1	Ireland	1	49	43	3	4	5	2	7	4	5	3	6	7
anonymous	EN	1	Ireland	2	50	89	2	1	7	1	6	7	6	1	7	5
anonymous	EN	1	Germany	2	48	61	4	2	7	2	4	5	7	1	4	2
anonymous	NL	1	Nederland	1	62	60	2	1	7	1	6	4	5	1	7	4
