# Supplementary material for: How Participation, Physiology, Psychology, and Cognition Interact in Multi- Marathon Runners: Insights from a Harmonised Cross-Sectional Analysis
Source: Research Square preprint supplement (doi:10.21203/rs.3.rs-7392979/v1), 2025-12-29
Supplement: Supplementary file 2 [file 5aa1a642afb3fbcd00b2c8b5.xlsx]

## Sheet: Sheet0
UserLanguage	Continents	Q36	Countries	Countries_6_TEXT	Gender	Gender_6_TEXT	Age	Total Mar_1	Percentage	PB	Running history_1	Running history_2	Annually	Motivation	Motivation_12_TEXT	Series	Series_7_TEXT	100 marathons imp_NPS_GROUP	100 marathons imp	Awards imp_NPS_GROUP	Awards imp	Awards	Awards_16_TEXT	Diet	Diet_6_TEXT	Covid	Symptons	Symptons_7_TEXT	kms	Multi Questions_1	Multi Questions_2	Multi Questions_3	Multi Questions_4	Multi Questions_5	HRZ	HR Strap	Headphones	Shoe	Shoe_5_TEXT	Stats	Stats_14_TEXT	Inj and Rec	Inj and Rec_19_TEXT	Treatments	Treatments_12_TEXT	Help	Help_3_TEXT	Multi questions 2_1	Multi questions 2_2
User Language	What continent do you live in?	What country are you resident?	Countries - Selected Choice	Countries - Other European Country - Text	To which gender identity do you most identify? - Selected Choice	To which gender identity do you most identify? - Not Listed (Please Specify) - Text	What age are you? Please type in your age.	How many Marathons/Ultras have you completed? Drag the bar below to the required number or Click radio button if over 1000, - Number of Marathons/Ultras completed	What is the percentage of Marathons vrs Ultras completed? e.g. If you have completed 50 marathon/Ultra events and 40 were Marathons choose 80%	What is your marathon PB/PR? Use the drop down list to specify the range of your Personal Best/ Personal Record (PB/PR) time for completing a marathon	Multi Marathon history Drag the bar to the appropriate age. Use the age that you took up long distance running/jogging/walking with a view to completing marathon distance (rather than school cross country etc..) - At what age did you start in the longer distance events?	Multi Marathon history Drag the bar to the appropriate age. Use the age that you took up long distance running/jogging/walking with a view to completing marathon distance (rather than school cross country etc..) - At what age did you complete your first marathon/Ultra?	On average how many Marathon/Ultra events do you complete annually? Choose a range and click next button	What motivates you to complete marathons/ultras? Click all applicaple and hit Next button - Selected Choice	What motivates you to complete marathons/ultras? Click all applicaple and hit Next button - Others - Please specify - Text	Which Multi-marathon series do you participate in? - Selected Choice	Which Multi-marathon series do you participate in? - Other - Please specify - Text	How important was achieving 100 marathons/Ultras? Click the number that represents the importance to you and click Next - Group	How important was achieving 100 marathons/Ultras? Click the number that represents the importance to you and click Next	How important is receiving awards or being part of an award club? Click the number that represents the importance to you and click Next - Group	How important is receiving awards or being part of an award club? Click the number that represents the importance to you and click Next	Which of the following award clubs do you participate in? Click all options applicable and click Next - Selected Choice	Which of the following award clubs do you participate in? Click all options applicable and click Next - Other - Please specify - Text	Do you follow any diet? Click the option that represents your diet or enter custom diet in 'other' box - Selected Choice	Do you follow any diet? Click the option that represents your diet or enter custom diet in 'other' box - Other (Please specify) - Text	Did you contract COVID? Choose "Probably Yes" if you have not tested positve but think you have had COVID.	Did you experience negative long-term (>8 weeks) effects? Please choose all relevant and click Next - Selected Choice	Did you experience negative long-term (>8 weeks) effects? Please choose all relevant and click Next - Other (Please specify) - Text	How many kms do you exercise in a typical week? Enter the no of kms your typically cover in an average week including events and training	Please answer Yes or No to each question then click Next - Do you follow a regular training regime from a coach or training plan?	Please answer Yes or No to each question then click Next - Do you do warmups before excercise?	Please answer Yes or No to each question then click Next - Are you a member of an organized traditional athletics club?	Please answer Yes or No to each question then click Next - Do you wear a GPS enabled device during training or events?	Please answer Yes or No to each question then click Next - Do you excercise with music/podcasts?	Do you train or do events by Heartrate Zone (Zone 2 etc) ?	Do you wear a Heart Rate Chest Strap?	Do you use bone conducting headphones?	Which type of shoe(s) do you normally use? Select all applicable for both Road and Trail then click next - Selected Choice	Which type of shoe(s) do you normally use? Select all applicable for both Road and Trail then click next - Other - Please specify - Text	Which commonly available fitness stats do you monitor? Please click all applicable - Selected Choice	Which commonly available fitness stats do you monitor? Please click all applicable - Other - Please Specify - Text	Have you had any of the following injuries? Select all anwers that apply - Selected Choice	Have you had any of the following injuries? Select all anwers that apply - Other - Please specify - Text	Which treatments do you find most useful? Click all applicable - Selected Choice	Which treatments do you find most useful? Click all applicable - Other - Please Specify - Text	Do you seek professional treatment for injuries? If Yes then please specify what type of profressional you have seen? - Selected Choice	Do you seek professional treatment for injuries? If Yes then please specify what type of profressional you have seen? - Specialist or other- Please detail here: - Text	Please answer Y/N to the following questions - Do you take medications that relieve pain before or during a marathon/Ultra?	Please answer Y/N to the following questions - Has your doctor ever said that you have a heart condition?
EN	Europe		England		Male		56	403	0-20%	3:16-3:30	45	43	0-10	It is a way of life,Keeping fit and healthy,Sense of accomplishment,Social life,To reach certain milestones,Travel				Detractor	6	Detractor	3	50 US states,100 Marathons from your national club,100 Marathon club UK milestones,Marathon Globetrotters,Marathon Maniacs,MCI Ireland club milestones,Mega Marathons,World Mega Marathon ranking 300+		Other (Please specify)	High Protein	Yes (positive test)	Forced to stop running for a period,Unusual fatigue		15	No	No	Yes	Yes	No	No	No		Cushioned		Floors,Steps		Ankle Injury,Blisters,Chafing,Calf Injury,Hip Injury,IT Band Syndrome,Knee Injury,Muscle Pull,Shin Splints,Tendonitus (Achilles tendinopathy)		Rest		No I do not seek professional advise for running injuries		Yes	No
EN	Europe		Northern Ireland		Male		58	345	0-20%	3:31-3:45	39	39	31-40	Awards,Continuous performance improvement,It is a way of life,Keeping fit and healthy,Multi Marahon Series (e.g. 10 in 10 days),Sense of accomplishment,Social life,To reach certain milestones,Total numbers		5 in 5 days,10 in 10 days,12 in 12 months,52 in 52 weeks,100 in 100 weeks,Back to Back		Passive	7	Passive	8	100 Marathons from your national club,100 Marathon club UK milestones,Abbot Marathon Majors 6 stars,Atlas 100-mile club milestones,Global Marathon challenges,Marathon Globetrotters,MCI Ireland club milestones,Mega Marathons,World Mega Marathon ranking 300+		Regular (including foods from all food groups)		No			50	No	No	Yes	Yes	No	No	No		Cushioned,Motion Control (made to support heavy weight, flat feet or severe overpronation),Stability		Heart Rate Variability,Pulse Ox,Resting HR,Sleep,Steps,Stress,VO2MAX		Chafing,Calf Injury,IT Band Syndrome,Knee Injury,Plantar Fasciitis,Runners Knee,Shin Splints		Accupuncture,Compression,Foam Rolling,Ice (Ice packs or cold compresses),Pain Relief,Rest,RICE (Rest Ice Compression Elevation),Support strapping		Physiotherapist		No	No
EN	Europe		Northern Ireland		Male		59	160	0-20%	3:01-3:15	41	42	11-20	Competition,Continuous performance improvement,It is a way of life,Sense of accomplishment,Travel				Passive	7	Detractor	5	Atlas 100-mile club milestones,Marathon Globetrotters		Regular (including foods from all food groups)		Yes (positive test)	Elevated Heart rate,Forced to stop running for a period,Unusual fatigue		80	No	Yes	Yes	Yes	Yes	Yes	Yes	Yes	Cushioned,Light weight		Calories,Heart Rate Variability,Intensity minutes,Max HR,Resting HR,Sleep,Steps		Ankle Injury,Blisters,Chafing,Calf Injury,Tendonitus (Achilles tendinopathy)		Compression,Elevation,Foam Rolling,Ice (Ice packs or cold compresses),Rest,RICE (Rest Ice Compression Elevation),Stretching		Physiotherapist		Yes	No
EN	North America	USA			Female		43	43	0-20%	4:46-5:00	34	35	11-20	It is a way of life,Sense of accomplishment,Social life						Detractor	3	Marathon Maniacs,Other - Please specify	GOMU	Other (Please specify)	Not strictly, but I do eat on the healthier side and try to fulfill my macro quotas daily.	Yes (positive test)	Elevated Heart rate,Heart Palpitations,Muscle aches,Shortness of breath,Unusual fatigue,Other (Please specify)	Lowered blood pressure Chest tightness Lung pain	24	No	Yes	Yes	Yes	No	No	No		Other - Please specify	Extra wide, medium cushion. Trail shoes 50%, road shoes 50%.	Heart Rate Variability,Floors,Intensity minutes,Max HR,Pulse Ox,Respiration,Resting HR,Sleep,Steps,VO2MAX		Blisters,Chafing,Calf Injury,Heat Exhaustion,Hypothermia,Muscle Pull,Morton's Neuroma,Tendonitus (Achilles tendinopathy),Other - Please specify	I've only had one of those that I considered a true injury though - where I needed to stop running for a brief period of therapy and recovery - the calf tear.	Elevation,Ice (Ice packs or cold compresses),Rest,Stretching,Other - Please Specify	Time.	Another Medical Professional (e.g. Physician, A&E),Specialist or other- Please detail here:	Airrosti - sport-specific chiropractor	Yes	No
EN	Europe		Republic of Ireland		Male		55	109	0-20%	4:01-4:15	41	41	0-10	Keeping fit and healthy				Promoter	9	Passive	8	Atlas 100-mile club milestones,MCI Ireland club milestones		Regular (including foods from all food groups)		Yes (positive test)	None		30	No	No	Yes	Yes	Yes	No	No	No	Light weight		None		Blisters		None		No I do not seek professional advise for running injuries		No	No
EN	Europe		Republic of Ireland		Female		73	855	0-20%	3:46-4:00	40	40	>51	It is a way of life,Keeping fit and healthy,Multi Marahon Series (e.g. 10 in 10 days),Running streaks,Sense of accomplishment,Social life,To reach certain milestones,Total numbers		5 in 5 days,10 in 10 days,52 in 52 weeks,Back to Back		Promoter	10	Passive	7	100 Marathon club UK milestones,Atlas 100-mile club milestones,MCI Ireland club milestones,Mega Marathons,World Mega Marathon ranking 300+		Vegetarian (excludes fish, poultry, and meat)		Yes (positive test)	None		112	No	No	Yes	Yes	Yes	No	No	No	Cushioned		Heart Rate Variability		Stress Fracture		Ice (Ice packs or cold compresses),RICE (Rest Ice Compression Elevation)		No I do not seek professional advise for running injuries		No	No
EN	Europe		Republic of Ireland		Female		59	206	0-20%	4:16-4:30	49	27	11-20	Keeping fit and healthy,Sense of accomplishment,Social life,Travel				Promoter	10	Promoter	10	None of these		Regular (including foods from all food groups)		Yes (positive test)	Shortness of breath		50	No	No	No	Yes	Yes	No	No	Yes	Cushioned		Calories,Heart Rate Variability,Steps		Ankle Injury,Stress Fracture		Pain Relief		No I do not seek professional advise for running injuries		Yes	No
EN	Europe		Northern Ireland		Male		52	62	0-20%	2:46-3:00	45	47	11-20	Competition,Keeping fit and healthy,Sense of accomplishment,Social life,To reach certain milestones						Detractor	2	Atlas 100-mile club milestones		Regular (including foods from all food groups)		Yes (positive test)	None		70	No	No	Yes	Yes	No	No	No		Cushioned,Light weight		Max HR,Resting HR,Steps,VO2MAX		Ankle Injury,Blisters,Chafing,Calf Injury,IT Band Syndrome		Elevation,Ice (Ice packs or cold compresses),Pain Relief,RICE (Rest Ice Compression Elevation)		No I do not seek professional advise for running injuries		Yes	No
EN	Europe		Republic of Ireland		Male		61	16	81-100%	3:16-3:30	51	51	0-10	Competition,Continuous performance improvement,It is a way of life,Keeping fit and healthy						Detractor	0	Abbot Marathon Majors 6 stars		Regular (including foods from all food groups)		Yes (positive test)	Elevated Heart rate		65	Yes	Yes	Yes	Yes	No	Yes	Yes		Cushioned		Max HR,Resting HR,VO2MAX		Ankle Injury,Other - Please specify	Lower back pain due to prolapsed disc (predates running)	Rest,Other - Please Specify	Certain stretches. But only specific ones.	Physiotherapist,Another Medical Professional (e.g. Physician, A&E)		No	No
EN	Europe		Republic of Ireland		Male		44	195	0-20%	3:01-3:15	30	43	0-10	Competition,Keeping fit and healthy				Detractor	6	Detractor	6	None of these		Regular (including foods from all food groups)		Yes (positive test)	None		50	No	No	No	Yes	Yes	No		No	Cushioned,Stability		Heart Rate Variability,Intensity minutes,Steps		Ankle Injury,Blisters,Chafing,Heat Exhaustion,IT Band Syndrome,Knee Injury,Muscle Pull,Runners Knee,Stress Fracture		Compression,Foam Rolling,Support strapping		Physiotherapist		Yes	No
EN	Europe		Republic of Ireland		Male		43	115	81-100%	3:16-3:30	33	34	0-10	Keeping fit and healthy,Sense of accomplishment,Social life,Total numbers,Travel				Promoter	10	Detractor	0	None of these		Regular (including foods from all food groups)		Yes (positive test)	Elevated Heart rate,Forced to stop running for a period,Shortness of breath,Unusual fatigue		75	No	No	Yes	Yes	Yes	No	No	No	Stability		Heart Rate Variability,Intensity minutes,Resting HR		Chafing,Heat Exhaustion,Hip Injury,Plantar Fasciitis,Runners Knee,Shin Splints,Stress Fracture		Rest		No I do not seek professional advise for running injuries		No	No
EN	Europe		Republic of Ireland		Male		69	381	81-100%	3:01-3:15	40	46	21-30	It is a way of life,Keeping fit and healthy,Sense of accomplishment,To reach certain milestones				Promoter	10	Detractor	5	100 Marathon club UK milestones,MCI Ireland club milestones		Regular (including foods from all food groups)		Yes (positive test)	Forced to stop running for a period,Muscle aches,Shortness of breath,Unusual fatigue		75	No	Yes	Yes	Yes	No	No	No		Cushioned		Steps		Ankle Injury,Blisters,Chafing,IT Band Syndrome,Knee Injury,Muscle Pull,Plantar Fasciitis,Runners Knee,Tendonitus (Achilles tendinopathy)		Pain Relief,RICE (Rest Ice Compression Elevation),Support strapping,Stretching		Physiotherapist,Specialist or other- Please detail here:		Yes	No
EN	Europe		England		Female		54	28	0-20%	4:31-4:45	39	39	0-10	Keeping fit and healthy,Sense of accomplishment						Detractor	3	None of these		Prefer not to say		Yes (positive test)	None		42	No	No	No	Yes	No	No	No		Stability		Calories,Intensity minutes,Steps		Blisters,Hip Injury,IT Band Syndrome,Knee Injury,Morton's Neuroma,Runners Knee		RICE (Rest Ice Compression Elevation)		Physiotherapist		No	Yes
EN	Europe		Republic of Ireland		Female		54	135	0-20%	5:16-5:30	42	42	11-20	Keeping fit and healthy,Sense of accomplishment,Social life				Detractor	6	Detractor	6	100 Marathons from your national club,MCI Ireland club milestones		Regular (including foods from all food groups)		Yes (positive test)	Unusual fatigue		30	No	No	No	Yes	No	No	No		Cushioned		Other - Please Specify	distance	Blisters,Calf Injury,Plantar Fasciitis,Shin Splints		Rest,Support strapping,Stretching		Physiotherapist		No	No
EN	Europe		Republic of Ireland		Female		44	103	0-20%	4:01-4:15	30		11-20	Continuous performance improvement,It is a way of life,Keeping fit and healthy,Sense of accomplishment,Social life,To reach certain milestones,Others - Please specify	My marathon friends mean so much to me			Promoter	10			100 Marathon club UK milestones,MCI Ireland club milestones		Vegetarian (excludes fish, poultry, and meat)		Yes (positive test)	Forced to stop running for a period,Shortness of breath,Unusual fatigue		70	No	No	No	Yes	Yes	No		No	Cushioned,Light weight		Calories,Stress		Other - Please specify	Piriformis	Stretching,Other - Please Specify	Daily yoga practice	Specialist or other- Please detail here:	I chose a relevant online yoga class for symptom relief	Yes	No
EN	Europe		Republic of Ireland		Male		54	138	61-80%	3:31-3:45	41	42	11-20	It is a way of life,Keeping fit and healthy,Sense of accomplishment,Social life,To reach certain milestones				Passive	8	Passive	7	100 Marathons from your national club,MCI Ireland club milestones		Regular (including foods from all food groups)		No			70	Yes	Yes	Yes	Yes	No	Yes	Yes		Cushioned		Calories,Heart Rate Variability,Floors,Intensity minutes,Max HR,Pulse Ox,Respiration,Resting HR,Sleep,Steps,Stress,VO2MAX		Blisters,Chafing		Accupuncture,Compression,Foam Rolling,Rest,Stretching		Physiotherapist,Another Medical Professional (e.g. Physician, A&E)		Yes	No
EN	Europe		Republic of Ireland		Male		52	68	21-40%	5:01-5:15	47	47	11-20	It is a way of life,Sense of accomplishment,Social life,Others - Please specify	Friendship					Promoter	10	MCI Ireland club milestones		Regular (including foods from all food groups)		No			60	No	No	No	Yes	Yes	No	No	No	Cushioned		VO2MAX		Blisters,Chafing		Rest		No I do not seek professional advise for running injuries		No	No
EN	Europe		England		Female		58	300	81-100%	3:46-4:00	49	49	21-30	Keeping fit and healthy,Sense of accomplishment,Social life,Travel						Detractor	0	100 Marathons from your national club,Marathon Maniacs		Prefer not to say		Yes (positive test)	Elevated Heart rate,Forced to stop running for a period,Heart Palpitations,Muscle aches,Shortness of breath,Unusual fatigue		50	No	No	No	Yes	No	No	No		Other - Please specify	Neutral shoe with custom orthotics	None		Ankle Injury,Blisters,Chafing,Calf Injury,Heat Exhaustion,Hip Injury,Hypothermia,IT Band Syndrome,Knee Injury,Muscle Pull,Plantar Fasciitis,Runners Knee		Accupuncture,Compression,Elevation,Foam Rolling,Ice (Ice packs or cold compresses),RICE (Rest Ice Compression Elevation),Support strapping,Stretching		Physiotherapist,Specialist or other- Please detail here:	Podiatrist Orthopedic surgeon Rheumatologist	No	No
EN	Europe		England		Female		74	222	61-80%	3:46-4:00	36	38	0-10	Keeping fit and healthy,Sense of accomplishment,Social life,Total numbers,Travel				Promoter	10	Promoter	10	100 Marathons from your national club,100 Marathon club UK milestones		Other (Please specify)	Non meat diet	No			25	No	No	Yes	Yes	No	No			Motion Control (made to support heavy weight, flat feet or severe overpronation)		None		IT Band Syndrome,Plantar Fasciitis,Tendonitus (Achilles tendinopathy)		Compression,Elevation,Ice (Ice packs or cold compresses),Rest,RICE (Rest Ice Compression Elevation)		Physiotherapist		No	Yes
EN	Europe		Republic of Ireland		Male		43	68	21-40%	3:31-3:45	34	33	0-10	It is a way of life,Keeping fit and healthy,Sense of accomplishment,To reach certain milestones,Total numbers,Travel						Detractor	2	MCI Ireland club milestones		Regular (including foods from all food groups)		Yes (positive test)	Forced to stop running for a period,Muscle aches,Shortness of breath,Unusual fatigue		30	No	No	Yes	Yes	Yes	No	No	Yes	Cushioned		VO2MAX		Ankle Injury,Blisters,Chafing,Calf Injury,Heat Exhaustion,Hip Injury,Knee Injury,Muscle Pull,Tendonitus (Achilles tendinopathy)		Foam Rolling,Rest,Stretching		Physiotherapist		No	No
EN	Europe		Republic of Ireland		Female		36	43	81-100%	4:16-4:30	28	28	0-10	It is a way of life,Social life,Total numbers,Others - Please specify	Make my Children proud as a Single working parent ive heard and seen people referring to Single Parents as lazy and unmotivated so part of my logic is that doing Marathons and ultras is the complete opposite to being Lazy and unmotivated					Detractor	0	None of these		Regular (including foods from all food groups)		Yes (positive test)	Muscle aches,Unusual fatigue		25	No	No	No	Yes	Yes	No		No	Stability		Sleep		Blisters,Chafing,Runners Knee		Pain Relief,Rest,Stretching		Specialist or other- Please detail here:	Sports therapist	Yes	No
EN	Europe		England		Female		65	216	21-40%	4:31-4:45	45	45	21-30	It is a way of life,Keeping fit and healthy,Multi Marahon Series (e.g. 10 in 10 days),Sense of accomplishment,Social life,Others - Please specify	All my marathons are part of my fund-raising for Alzheimer's Research UK	12 in 12 months,52 in 52 weeks,Back to Back		Detractor	5	Detractor	5	100 Marathon club UK milestones,Mega Marathons		Vegetarian (excludes fish, poultry, and meat)		No			120	No	Yes	No	Yes	No	No	No		Cushioned,Stability		None		Ankle Injury,Blisters,Chafing,Calf Injury,IT Band Syndrome,Knee Injury,Muscle Pull,Plantar Fasciitis,Shin Splints		Compression,Elevation,Ice (Ice packs or cold compresses),Pain Relief,RICE (Rest Ice Compression Elevation),Support strapping,Stretching		Physiotherapist		No	No
EN	Europe		England		Male		71	634	61-80%	3:01-3:15	30	30	>51	It is a way of life,Keeping fit and healthy,Social life,Travel				Passive	7	Passive	7	100 Marathons from your national club,100 Marathon club UK milestones		Regular (including foods from all food groups)		No			40	No	No	No	Yes	No	No	No		Cushioned		Resting HR		Ankle Injury,Blisters,Chafing,Calf Injury,Heat Exhaustion,Hip Injury,Knee Injury,Muscle Pull,Plantar Fasciitis,Runners Knee,Shin Splints,Stress Fracture		Compression,Elevation,Foam Rolling,Ice (Ice packs or cold compresses),Pain Relief,Rest,RICE (Rest Ice Compression Elevation),Support strapping		Another Medical Professional (e.g. Physician, A&E),Specialist or other- Please detail here:	Knee consultant/MRI scans	No	No
EN	Europe		Republic of Ireland		Female		55	238	0-20%	4:01-4:15	37	38	31-40	It is a way of life,Keeping fit and healthy,Social life,To reach certain milestones,Total numbers,Travel				Promoter	10	Promoter	10	100 Marathons from your national club,Abbot Marathon Majors 6 stars,Marathon Globetrotters,MCI Ireland club milestones		Regular (including foods from all food groups)		Yes (positive test)	None		60	No	Yes	Yes	Yes	No	No	No		Cushioned,Stability		Sleep,Steps		Morton's Neuroma,Stress Fracture		Accupuncture,Compression,Foam Rolling,Stretching		Physiotherapist		No	No
EN	Europe		Scotland		Male		55	311	0-20%	3:01-3:15	38	38	0-10	It is a way of life,Keeping fit and healthy,Social life,Total numbers,Travel				Promoter	10	Detractor	2	100 Marathon club UK milestones,Marathon Maniacs,Mega Marathons,World Mega Marathon ranking 300+		Regular (including foods from all food groups)		Yes (positive test)	None		70	No	No	Yes	Yes	Yes	No		No	Stability		None		Runners Knee		RICE (Rest Ice Compression Elevation),Support strapping		No I do not seek professional advise for running injuries		No	No
EN	Europe		Republic of Ireland		Male		39	113	61-80%	3:46-4:00	28	29	11-20	It is a way of life,Keeping fit and healthy,Multi Marahon Series (e.g. 10 in 10 days),Sense of accomplishment,Social life,Travel		5 in 5 days,12 in 12 months,Back to Back		Promoter	9	Promoter	9	100 Marathons from your national club,MCI Ireland club milestones		Regular (including foods from all food groups)		Yes (positive test)	Elevated Heart rate,Shortness of breath,Unusual fatigue		30	Yes	No	Yes	Yes	Yes	No	No	No	Cushioned		Heart Rate Variability,Intensity minutes,Resting HR,Steps,VO2MAX		Ankle Injury,Blisters,Chafing,Hip Injury,Muscle Pull,Runners Knee,Shin Splints,Tendonitus (Achilles tendinopathy),Other - Please specify	Cellulitis	Compression,Elevation,Pain Relief,Rest		Physiotherapist,Specialist or other- Please detail here:	Osteopath	Yes	No
EN	Europe		Republic of Ireland		Male		49	67	81-100%	4:01-4:15	35	35	0-10	It is a way of life,Keeping fit and healthy,Sense of accomplishment						Detractor	0	None of these		Regular (including foods from all food groups)		No			50	No	No	No	No	Yes			No	Motion Control (made to support heavy weight, flat feet or severe overpronation)		None		None		None		No I do not seek professional advise for running injuries		No	No
EN	Europe		England		Male		55	257	0-20%	3:31-3:45	41	42	31-40	Competition,Continuous performance improvement,It is a way of life,Keeping fit and healthy,Multi Marahon Series (e.g. 10 in 10 days),Sense of accomplishment,Social life,Total numbers		10 in 10 days,52 in 52 weeks		Promoter	10	Passive	8	100 Marathon club UK milestones		Vegetarian (excludes fish, poultry, and meat)		No			50	No	No	No	Yes	No	No	No		Motion Control (made to support heavy weight, flat feet or severe overpronation)		Calories,VO2MAX		Blisters,Calf Injury,Knee Injury,Muscle Pull,Plantar Fasciitis,Runners Knee		Ice (Ice packs or cold compresses),RICE (Rest Ice Compression Elevation),Stretching,Other - Please Specify	Focused shockwave Active release therapy	Physiotherapist,Specialist or other- Please detail here:	Chiropractor	No	No
EN	Europe		Northern Ireland		Female		51	300	0-20%	4:01-4:15	45		>51	It is a way of life,Keeping fit and healthy,Social life				Promoter	10	Promoter	10	100 Marathon club UK milestones,Global Marathon challenges,MCI Ireland club milestones		Regular (including foods from all food groups)		No			100	No	No	No	Yes	No	No	No		Stability		Heart Rate Variability,Resting HR,Steps		Hip Injury,Knee Injury		Support strapping		Physiotherapist		Yes	No
EN	Europe		Republic of Ireland		Female		51	228	81-100%	4:16-4:30	44	44	41-50	Keeping fit and healthy,Sense of accomplishment,Travel				Promoter	10	Detractor	0	100 Marathons from your national club		Regular (including foods from all food groups)		No			60	No	No	No	Yes	No	No	No		Cushioned		Calories		Hip Injury,Plantar Fasciitis,Runners Knee,Shin Splints		Ice (Ice packs or cold compresses),Pain Relief,Stretching		No I do not seek professional advise for running injuries		Yes	No
EN	Europe		Republic of Ireland		Male		52	106	81-100%	4:16-4:30	21	21	11-20	Continuous performance improvement,It is a way of life,Keeping fit and healthy,Sense of accomplishment,Social life,Travel				Passive	8	Passive	8	100 Marathons from your national club,Abbot Marathon Majors 6 stars,MCI Ireland club milestones		Regular (including foods from all food groups)		Yes (positive test)	Shortness of breath		50	No	Yes	No	Yes	No	Yes	No		Stability		Calories,Heart Rate Variability,Max HR,Pulse Ox,Resting HR,VO2MAX		Ankle Injury,Blisters,Chafing,Plantar Fasciitis,Shin Splints,Tendonitus (Achilles tendinopathy),Other - Please specify	Cyathica	Accupuncture,Foam Rolling,Ice (Ice packs or cold compresses),Support strapping,Stretching		Physiotherapist		No	No
EN	Europe		Republic of Ireland		Female		56	54	81-100%	3:01-3:15	42	43	0-10	Competition,Continuous performance improvement,Keeping fit and healthy,Running streaks,Sense of accomplishment						Detractor	6	Abbot Marathon Majors 6 stars,Global Marathon challenges		Regular (including foods from all food groups)		Yes (positive test)	None		70	Yes	Yes	Yes	Yes	No	No	No		Light weight		Resting HR,Sleep,Steps		Chafing,Plantar Fasciitis,Shin Splints		Compression,Ice (Ice packs or cold compresses),Pain Relief,RICE (Rest Ice Compression Elevation),Support strapping,Stretching		Physiotherapist		Yes	No
EN	Europe		England		Male		55	145	61-80%	2:46-3:00	22	23	0-10	Awards,Competition,Continuous performance improvement,It is a way of life,Keeping fit and healthy,Sense of accomplishment,Social life				Detractor	0	Promoter	10	None of these		Regular (including foods from all food groups)		Yes (positive test)	Unusual fatigue		50	No	Yes	No	Yes	Yes	No		No	Cushioned,Stability		Heart Rate Variability		None		Ice (Ice packs or cold compresses)		Physiotherapist		No	No
EN	Europe		England		Male		51	75	61-80%	4:16-4:30	40	40	11-20	Sense of accomplishment,Social life						Detractor	0	Global Marathon challenges,Mega Marathons		Regular (including foods from all food groups)		Yes (positive test)	None		30	No	No	No	Yes	No	No	No		Cushioned		Calories,Heart Rate Variability,Intensity minutes,Resting HR,Sleep,VO2MAX		Heat Exhaustion,Knee Injury		Accupuncture,Elevation,Foam Rolling,Ice (Ice packs or cold compresses),Rest		Physiotherapist		No	No
EN	Europe		Northern Ireland		Male		42	170	81-100%	3:16-3:30	26	26	21-30	It is a way of life,Keeping fit and healthy,Social life				Detractor	6	Detractor	1	100 Marathon club UK milestones,MCI Ireland club milestones		Regular (including foods from all food groups)		Probably yes (no positive test)	None		40	No	Yes	No	Yes	No	No	No		Stability		Sleep,Steps		Ankle Injury,Blisters,Chafing,Calf Injury,Knee Injury,Muscle Pull,Runners Knee		Ice (Ice packs or cold compresses),Rest,Stretching		Physiotherapist,Specialist or other- Please detail here:	Sports massage	Yes	No
EN	Europe		Northern Ireland		Male		57	6	41-60%	2:46-3:00	16	17	0-10	Competition,Continuous performance improvement,Keeping fit and healthy,Sense of accomplishment,Travel						Detractor	0	None of these		Regular (including foods from all food groups)		No			100	No	No	Yes	Yes	Yes	Yes	Yes	No	Cushioned		Calories,VO2MAX		Calf Injury,Runners Knee,Tendonitus (Achilles tendinopathy)		Foam Rolling,Rest		Specialist or other- Please detail here:	Sports massage therapist	No	No
EN	Europe		England		Female		55	140	21-40%	3:46-4:00	43	44	21-30	Awards,Competition,It is a way of life,Keeping fit and healthy,Multi Marahon Series (e.g. 10 in 10 days),Sense of accomplishment,Social life,To reach certain milestones,Total numbers,Others - Please specify	To test myself/challenge myself - find out what I can do. Get out in natural surroundings on trails for long periods. To improve, although that's not continuous. Winning in or doing well in my age group is always a bonus.	10 in 10 days		Promoter	10	Detractor	4	100 Marathons from your national club,100 Marathon club UK milestones,Mega Marathons		Vegan		Yes (positive test)	Unusual fatigue,Other (Please specify)	Not sure if this counts as separate from fatigue or not, but reduced pace - couldn't run at the pace I had done before for a given distance.	80	No	No	Yes	Yes	No	No	No		Minimal e.g. Vibram or flip flops,Other - Please specify	Zero-drop with wide forefoot but some cushioning for longer distances.	None		Ankle Injury,Blisters,Chafing,Calf Injury,Muscle Pull,Runners Knee,Stress Fracture,Other - Please specify	Posterior tibial tendon tendinopathy and tear (tear from a cycling accident not from running). 'Ankle injury' was a Weber B fibular fracture - and was NOT from running but from a slip walking down a grassy bank NOT while out running. Plantar plate tear from a slip and fall on mud while volunteering, not running. Stress fracture (pelvis) was secondary to imbalance after the fractured ankle). Anter…	Other - Please Specify	Massage stick. Massage.	Physiotherapist,Another Medical Professional (e.g. Physician, A&E),Specialist or other- Please detail here:	Sports masseur for minor strains. Physiotherapist as first port of call if more serious, except if checking for possible fracture (then A&E).	No	No
EN	Europe		Republic of Ireland		Male		49	100	0-20%	3:01-3:15	32	32	0-10	Continuous performance improvement,Keeping fit and healthy,To reach certain milestones,Total numbers				Promoter	10	Detractor	6	100 Marathons from your national club,100 Marathon club UK milestones,MCI Ireland club milestones		Regular (including foods from all food groups)		Yes (positive test)	None		40	Yes	Yes	Yes	Yes	Yes	Yes	Yes	No	Light weight		Heart Rate Variability,Intensity minutes,Max HR		IT Band Syndrome		Other - Please Specify	Massage	Physiotherapist		No	No
EN	Europe		Republic of Ireland		Female		57	4	0-20%	4:16-4:30	47	48	0-10	Keeping fit and healthy,Sense of accomplishment,Social life,Travel						Detractor	2	None of these		Regular (including foods from all food groups)		Yes (positive test)	None		25	Yes	Yes	Yes	Yes	Yes	No	No	No	Cushioned,Light weight		Heart Rate Variability,Intensity minutes,Resting HR,Sleep,Steps,VO2MAX		Chafing,Calf Injury,Tendonitus (Achilles tendinopathy)		Ice (Ice packs or cold compresses),Pain Relief,Rest,Support strapping		Physiotherapist		Yes	No
EN	Europe		England		Female		57	39	21-40%	>6:00	50	50	31-40	It is a way of life,Keeping fit and healthy,Multi Marahon Series (e.g. 10 in 10 days),Sense of accomplishment,To reach certain milestones,Total numbers,Others - Please specify	Mental health	5 in 5 days,12 in 12 months,Other - Please specify	Just finished 26 marathons in 52 weeks and 12 ultras in 6 months			Detractor	0	Global Marathon challenges,Mega Marathons,Other - Please specify	Working towards 100 MC	Regular (including foods from all food groups)		No			42	No	No	No	Yes	Yes	No		No	Cushioned,Stability		None		Blisters,Heat Exhaustion,Shin Splints,Tendonitus (Achilles tendinopathy)		Ice (Ice packs or cold compresses),Pain Relief,Other - Please Specify	Had shockwave on Achilles tendinopathy as part of RCT which cured it successfully	Physiotherapist		Yes	No
EN	Europe		Republic of Ireland		Gender Variant/Non-Conforming		23	86	81-100%	2:31-2:45	18	18	21-30	None of the above						Promoter	10	Marathon Maniacs		Vegetarian (excludes fish, poultry, and meat)		Yes (positive test)	Elevated Heart rate,Heart Palpitations,Shortness of breath,Unusual fatigue		120	Yes	No	Yes	Yes	No	No	Yes		Minimal e.g. Vibram or flip flops		Calories,Pulse Ox,Sleep,Steps		Ankle Injury,Blisters,Chafing,Calf Injury,Knee Injury,Muscle Pull,Plantar Fasciitis,Shin Splints,Stress Fracture,Tendonitus (Achilles tendinopathy)		Ice (Ice packs or cold compresses),Surgery		Another Medical Professional (e.g. Physician, A&E)		Yes	Yes
EN	North America	USA			Male		59	100	61-80%	2:46-3:00	30	19	0-10	Keeping fit and healthy				Detractor	0	Detractor	0	None of these		Pesco-vegetarian (includes fish)		Yes (positive test)	Unusual fatigue		70	No	Yes	Yes	Yes	No	No	No		Cushioned		Max HR,Steps,VO2MAX		Ankle Injury,Tendonitus (Achilles tendinopathy)		Foam Rolling,RICE (Rest Ice Compression Elevation),Support strapping,Stretching		No I do not seek professional advise for running injuries		Yes	No
EN	Europe		Republic of Ireland		Male		61	16	81-100%	3:16-3:30	51	51	0-10	Competition,Continuous performance improvement,It is a way of life,Keeping fit and healthy,Social life						Detractor	0	Abbot Marathon Majors 6 stars		Regular (including foods from all food groups)		Yes (positive test)	Elevated Heart rate		65	Yes	No	Yes	Yes	No	Yes	Yes		Cushioned		Max HR,Resting HR,VO2MAX		Ankle Injury,Other - Please specify	Lower back, but not running related.	None		Physiotherapist,Specialist or other- Please detail here:	GP for referral (eg MRI, cardiology)	No	No
EN	Europe		England		Female		56	166	81-100%	4:31-4:45	34	34	21-30	Awards,It is a way of life,Keeping fit and healthy,Multi Marahon Series (e.g. 10 in 10 days),Sense of accomplishment,Social life,To reach certain milestones,Total numbers,Travel		10 in 10 days,12 in 12 months,52 in 52 weeks		Promoter	9	Detractor	5	100 Marathons from your national club,100 Marathon club UK milestones,Abbot Marathon Majors 6 stars,Global Marathon challenges		Regular (including foods from all food groups)		Yes (positive test)	None		50	Yes	No	No	Yes	No	No	No		Cushioned		Heart Rate Variability,Floors,Intensity minutes,Resting HR,Sleep,Steps,Stress,VO2MAX		Blisters,Chafing,Hip Injury,IT Band Syndrome,Knee Injury,Muscle Pull,Shin Splints		Compression,Foam Rolling,Pain Relief,Stretching,Other - Please Specify	Heat	Specialist or other- Please detail here:	Osteopath	No	No
EN	Europe		Republic of Ireland		Male		56	99	0-20%	3:16-3:30	45	43	11-20	Keeping fit and healthy,Social life,To reach certain milestones,Total numbers,Travel						Passive	8	100 Marathons from your national club		Regular (including foods from all food groups)		Yes (positive test)	Elevated Heart rate,Forced to stop running for a period,Heart Palpitations,Shortness of breath,Other (Please specify)	Blood Pressure variation between High and Low	80	No	Yes	No	Yes	No	Yes	Yes		Stability		Calories,Heart Rate Variability,Resting HR,VO2MAX		Ankle Injury,Blisters,Chafing,Calf Injury,Hip Injury,IT Band Syndrome,Knee Injury,Muscle Pull,Plantar Fasciitis,Runners Knee,Shin Splints		Accupuncture,Compression,Elevation,Foam Rolling,Ice (Ice packs or cold compresses),Pain Relief,Rest,RICE (Rest Ice Compression Elevation),Support strapping,Stretching		Physiotherapist,Another Medical Professional (e.g. Physician, A&E)		Yes	No
EN	Europe		England		Male		55	531	81-100%	3:46-4:00	41	41	41-50	It is a way of life,Keeping fit and healthy,Sense of accomplishment				Promoter	10	Detractor	0	100 Marathons from your national club,Marathon Maniacs,Mega Marathons,World Mega Marathon ranking 300+		Regular (including foods from all food groups)		Yes (positive test)	None		80	No	No	No	Yes	Yes	No	No	Yes	Cushioned,Motion Control (made to support heavy weight, flat feet or severe overpronation),Stability		Heart Rate Variability,Floors,Max HR,Resting HR,Sleep,Steps,VO2MAX		Ankle Injury,Blisters,Chafing,Calf Injury,Hip Injury,IT Band Syndrome,Knee Injury,Muscle Pull,Runners Knee,Shin Splints,Stress Fracture		Compression,Elevation,Ice (Ice packs or cold compresses),Pain Relief,RICE (Rest Ice Compression Elevation),Support strapping,Stretching,Surgery		Another Medical Professional (e.g. Physician, A&E)		Yes	No
EN	Europe		Northern Ireland		Male		46	10	0-20%	3:46-4:00	35	36	0-10	Keeping fit and healthy,Sense of accomplishment						Detractor	0	None of these		Regular (including foods from all food groups)		Yes (positive test)	Forced to stop running for a period,Shortness of breath,Other (Please specify)	persistent cough	30	No	No	No	Yes	No	No	No		Cushioned,Other - Please specify	Hoka Speed Goat	Max HR,Resting HR,Steps		Tendonitus (Achilles tendinopathy)		Rest		Physiotherapist		Yes	No
EN	Europe		Republic of Ireland		Female		54	226	0-20%	3:31-3:45	33	33	11-20	It is a way of life,Keeping fit and healthy,Sense of accomplishment,Travel				Detractor	6	Passive	7	Abbot Marathon Majors 6 stars,MCI Ireland club milestones,Other - Please specify	Individual marathon medals and official results	Regular (including foods from all food groups)		Yes (positive test)	None		80	No	No	No	Yes	Yes	No	Yes	Yes	Cushioned,Stability		Intensity minutes,Max HR,Resting HR,VO2MAX		Blisters,Calf Injury,IT Band Syndrome,Muscle Pull,Plantar Fasciitis,Stress Fracture		Ice (Ice packs or cold compresses),Pain Relief,Rest,RICE (Rest Ice Compression Elevation),Stretching,Other - Please Specify	Deep tissue massage by physical therapist	Specialist or other- Please detail here:	Physical therapist	No	No
EN	Europe		Republic of Ireland		Male		43	42	81-100%	3:31-3:45	31	34	0-10	Awards,Continuous performance improvement,Keeping fit and healthy,Sense of accomplishment						Passive	8	MCI Ireland club milestones		Regular (including foods from all food groups)		Yes (positive test)	Elevated Heart rate,Shortness of breath,Unusual fatigue		30	No	No	No	Yes	No	No	No		Cushioned		Calories,Steps		Chafing,Calf Injury,Plantar Fasciitis,Tendonitus (Achilles tendinopathy)		Accupuncture,Foam Rolling,Stretching		Physiotherapist		Yes	No
EN	Europe		Republic of Ireland		Female		56	90	81-100%	3:46-4:00	49	49	21-30	Keeping fit and healthy,Sense of accomplishment,Social life,To reach certain milestones,Total numbers,Travel						Detractor	5	Abbot Marathon Majors 6 stars,MCI Ireland club milestones		Regular (including foods from all food groups)		No			50	Yes	Yes	Yes	Yes	No	No	No		Cushioned,Light weight		Intensity minutes,Resting HR,Steps,VO2MAX		Chafing,Plantar Fasciitis		Ice (Ice packs or cold compresses),Rest,Stretching		Physiotherapist		No	No
EN	Europe		Republic of Ireland		Male		56	126	81-100%	4:01-4:15	42	42	11-20	It is a way of life,Sense of accomplishment,Social life,To reach certain milestones,Travel				Passive	8	Passive	8	MCI Ireland club milestones		Regular (including foods from all food groups)		No			50	No	No	No	No	No				Cushioned		None		Blisters,Chafing,Calf Injury,Muscle Pull		Elevation,Rest,Stretching		No I do not seek professional advise for running injuries		No	No
EN	Europe		Republic of Ireland		Male		41	45	61-80%	3:01-3:15	80	22	0-10	Keeping fit and healthy						Passive	7	None of these		Regular (including foods from all food groups)		No			50	Yes	Yes	Yes	Yes	No	No			Cushioned		None		Chafing,Hip Injury		Foam Rolling,Stretching		Physiotherapist		No	No
EN	Europe		England		Female		59	307	61-80%	3:46-4:00	38	39	21-30	It is a way of life,Keeping fit and healthy,Social life,Travel				Promoter	10			None of these		Vegetarian (excludes fish, poultry, and meat)		Yes (positive test)	None		64	No	No	Yes	Yes	No	No	No		Cushioned		Heart Rate Variability,Intensity minutes,Max HR,Resting HR,Sleep,Steps,Stress,VO2MAX		Ankle Injury,Blisters,Chafing,Calf Injury,Muscle Pull,Plantar Fasciitis		Ice (Ice packs or cold compresses),Pain Relief,Rest,RICE (Rest Ice Compression Elevation),Stretching,Other - Please Specify	Shock wave therapy for PF	Physiotherapist		No	No
EN	Europe		Republic of Ireland		Male		49	151	61-80%	3:31-3:45	40	41	0-10	It is a way of life,Keeping fit and healthy,Sense of accomplishment				Detractor	5	Detractor	4	None of these		Regular (including foods from all food groups)		No			60	No	No	Yes	Yes	No	No	No		Cushioned		Calories,Intensity minutes,Resting HR,Sleep,VO2MAX		Blisters,Chafing,Heat Exhaustion,IT Band Syndrome,Muscle Pull,Tendonitus (Achilles tendinopathy)		Compression,Foam Rolling,Support strapping,Stretching		Physiotherapist		Yes	No
EN	Europe		Republic of Ireland		Male		56	72	61-80%	3:16-3:30	48	48	11-20	Competition,Continuous performance improvement,It is a way of life,Keeping fit and healthy,Sense of accomplishment,To reach certain milestones						Detractor	3	MCI Ireland club milestones		Regular (including foods from all food groups)		Yes (positive test)	None		65	No	Yes	No	Yes	No	No	No		Stability		Intensity minutes,VO2MAX		None		Rest,Stretching		No I do not seek professional advise for running injuries		No	No
EN	Europe		Republic of Ireland		Female		46	27	81-100%	4:16-4:30	32	32	0-10	Keeping fit and healthy,Social life,Total numbers,Travel						Passive	7	MCI Ireland club milestones		Regular (including foods from all food groups)		No			55	Yes	Yes	Yes	Yes	Yes	Yes	Yes	Yes	Stability		Heart Rate Variability,Max HR,Sleep,Steps,Stress,VO2MAX		Ankle Injury,Chafing,Calf Injury,Heat Exhaustion,IT Band Syndrome,Knee Injury,Plantar Fasciitis,Runners Knee,Stress Fracture		Foam Rolling,Ice (Ice packs or cold compresses),Pain Relief,Support strapping,Stretching		Physiotherapist		No	No
EN	Europe		Republic of Ireland		Female		47	107	0-20%	4:16-4:30	42	42	11-20	It is a way of life,Keeping fit and healthy,Social life				Passive	7	Passive	7	MCI Ireland club milestones		Regular (including foods from all food groups)		Yes (positive test)	Forced to stop running for a period,Unusual fatigue		50	No	No	No	Yes	No	No	No		Cushioned		None		None		Accupuncture,Ice (Ice packs or cold compresses),Rest,Stretching		No I do not seek professional advise for running injuries		No	Yes
EN	Europe		Republic of Ireland		Male		52	39	81-100%	3:01-3:15	42	42	0-10	It is a way of life						Detractor	6	None of these		Other (Please specify)	None really	Yes (positive test)	Elevated Heart rate,Shortness of breath		80	No	No	No	Yes	Yes	No	No	No	Cushioned,Light weight		Heart Rate Variability		Blisters,Chafing,Calf Injury,Hip Injury,Knee Injury,Muscle Pull,Stress Fracture		Ice (Ice packs or cold compresses),Support strapping		Physiotherapist,Another Medical Professional (e.g. Physician, A&E),Specialist or other- Please detail here:		No	No
EN	Europe		Northern Ireland		Male		57	81	81-100%	3:01-3:15	19	19	0-10	Keeping fit and healthy,Running streaks,Sense of accomplishment,Social life,To reach certain milestones,Total numbers,Travel						Detractor	4	None of these		Regular (including foods from all food groups)		Yes (positive test)	None		70	No	No	No	Yes	No	No	No		Cushioned		None		Ankle Injury,Blisters,Calf Injury,Knee Injury,Tendonitus (Achilles tendinopathy)		Foam Rolling,Ice (Ice packs or cold compresses),Rest,Support strapping,Stretching		Physiotherapist		No	No
EN	Europe		Republic of Ireland		Female		40	9	81-100%	3:46-4:00	36	37	0-10	Continuous performance improvement,It is a way of life,Keeping fit and healthy,Sense of accomplishment						Detractor	0	None of these		Vegetarian (excludes fish, poultry, and meat)		Yes (positive test)	None		60	Yes	Yes	Yes	Yes	Yes	No	No	No	Cushioned		Heart Rate Variability,VO2MAX		Chafing,IT Band Syndrome,Knee Injury,Plantar Fasciitis,Runners Knee		Accupuncture,Foam Rolling,Pain Relief,Stretching		Physiotherapist		Yes	No
EN	Europe		Republic of Ireland		Male		42	8	81-100%	2:31-2:45	34	35	0-10	Continuous performance improvement,Keeping fit and healthy,Others - Please specify	Addiction. Would love to stop but can’t as I also like to eat and somehow need to burn the calories					Detractor	0	None of these		Regular (including foods from all food groups)		Probably yes (no positive test)	None		100	Yes	Yes	Yes	Yes	Yes	No	No	No	Cushioned,Light weight		None		Blisters,Chafing,Hip Injury,Stress Fracture		Other - Please Specify	Specific strength work. Rest might be good sometimes but also leads to further injuries. Cross training is also good	Physiotherapist		No	No
EN	Europe		Republic of Ireland		Female		59	19	81-100%	5:31-5:45	50	51	0-10	It is a way of life,Keeping fit and healthy,Sense of accomplishment,To reach certain milestones,Travel						Detractor	3	Abbot Marathon Majors 6 stars		Regular (including foods from all food groups)		Yes (positive test)	Elevated Heart rate,Muscle aches,Shortness of breath,Unusual fatigue		60	Yes	No	No	Yes	Yes	No	No	No	Stability		Calories,Heart Rate Variability,Resting HR,Sleep,Steps,Stress,VO2MAX		Blisters,Chafing,Hip Injury,IT Band Syndrome,Knee Injury,Muscle Pull,Morton's Neuroma,Plantar Fasciitis		Compression,Ice (Ice packs or cold compresses),Pain Relief,Support strapping		No I do not seek professional advise for running injuries		Yes	No
EN	Europe		Republic of Ireland		Male		49	250	61-80%	2:46-3:00	36	36	11-20	It is a way of life,Keeping fit and healthy,Sense of accomplishment,Social life,Travel				Detractor	5	Detractor	6	Other - Please specify	Would love to complete more than 10 spartathlon in my lifetime. So far started and finish 6	Regular (including foods from all food groups)		Yes (positive test)	Elevated Heart rate,Forced to stop running for a period,Muscle aches,Shortness of breath,Unusual fatigue		50	No	No	Yes	Yes	No	No	No		Cushioned,Light weight		Calories,Heart Rate Variability,Resting HR,Steps		Blisters,Chafing,Calf Injury,Heat Exhaustion,Hypothermia,IT Band Syndrome,Muscle Pull,Plantar Fasciitis		Rest,RICE (Rest Ice Compression Elevation),Stretching		No I do not seek professional advise for running injuries		No	No
EN	Europe		Republic of Ireland		Male		48	6	81-100%	3:46-4:00	41	42	0-10	Keeping fit and healthy						Detractor	2	None of these		Regular (including foods from all food groups)		No			70	Yes	Yes	Yes	Yes	No	No	No		Stability		Calories,Floors,Intensity minutes,Sleep,Steps		Ankle Injury,Plantar Fasciitis		Foam Rolling,Ice (Ice packs or cold compresses),Pain Relief		Physiotherapist		No	Yes
EN	Europe		Republic of Ireland		Male		48	93	81-100%	3:46-4:00	38	40	11-20	It is a way of life						Passive	8	100 Marathons from your national club,MCI Ireland club milestones		Regular (including foods from all food groups)		No			5	No	No	Yes	Yes	No	No	No		Cushioned		Resting HR		Blisters,Plantar Fasciitis		Rest,Support strapping		No I do not seek professional advise for running injuries		Yes	No
EN	Europe		Republic of Ireland		Male		51	33	81-100%	3:16-3:30	46	49	11-20	Sense of accomplishment						Detractor	2	MCI Ireland club milestones		Regular (including foods from all food groups)		Yes (positive test)	Muscle aches,Unusual fatigue		36	No	No	No	Yes	No	No			Cushioned,Stability		Heart Rate Variability,VO2MAX		Hip Injury,Knee Injury,Tendonitus (Achilles tendinopathy)		Foam Rolling,Rest		Physiotherapist,Specialist or other- Please detail here:	Sports clinic	Yes	No
EN	Europe		Republic of Ireland		Female		59	100	0-20%	4:31-4:45	54	56	21-30	Continuous performance improvement,It is a way of life,Keeping fit and healthy,Sense of accomplishment,Social life,Travel				Detractor	5	Detractor	5	100 Marathons from your national club,MCI Ireland club milestones		Regular (including foods from all food groups)		Yes (positive test)	Elevated Heart rate,Forced to stop running for a period,Muscle aches,Shortness of breath,Unusual fatigue		100	Yes	Yes	No	Yes	Yes	No	No	Yes	Cushioned,Stability		Heart Rate Variability,Max HR,Resting HR,Sleep,Steps		Blisters,Chafing,Heat Exhaustion,Hip Injury,Plantar Fasciitis,Stress Fracture		Compression,Stretching,Other - Please Specify	Mobility exercises to ease effective area	Physiotherapist		No	No
EN	Europe		Republic of Ireland		Male		48	207	0-20%	3:16-3:30	36	38	21-30	Competition,It is a way of life,Keeping fit and healthy,Sense of accomplishment,To reach certain milestones				Detractor	6	Detractor	4	None of these		Regular (including foods from all food groups)		Yes (positive test)	None		70	No	No	Yes	Yes	No	No	No		Cushioned,Stability		Steps		Blisters,Chafing,Calf Injury,Knee Injury,Plantar Fasciitis,Runners Knee		Foam Rolling,Ice (Ice packs or cold compresses),RICE (Rest Ice Compression Elevation),Stretching,Other - Please Specify	Pilates + massage	Specialist or other- Please detail here:	Physical therapist	No	No
EN	Europe		Republic of Ireland		Female		46	160	41-60%	3:16-3:30	38	36	21-30	Competition,Continuous performance improvement,Keeping fit and healthy,Sense of accomplishment,Social life,To reach certain milestones				Passive	7			None of these		Pesco-vegetarian (includes fish)		Yes (positive test)	Elevated Heart rate,Heart Palpitations,Muscle aches,Shortness of breath,Unusual fatigue		100	Yes	No	Yes	Yes	Yes	No		No	Stability		VO2MAX		Blisters,Chafing		Accupuncture,Foam Rolling		Physiotherapist		Yes	No
EN	Europe		England		Female		60	790	21-40%	3:31-3:45	46	48	>51	It is a way of life,Keeping fit and healthy				Passive	8	Detractor	4	100 Marathon club UK milestones		Pesco-vegetarian (includes fish)		Yes (positive test)	Elevated Heart rate,Shortness of breath,Unusual fatigue		80	No	No	No	Yes	No	No	No		Cushioned
EN	Europe		Republic of Ireland		Male		51	142	61-80%	3:01-3:15	39	39	11-20	It is a way of life,Keeping fit and healthy,Sense of accomplishment,Social life,Others - Please specify	Mental Health - prone to depression and drinking too much and running is a distraction.			Detractor	4	Detractor	0	None of these		Other (Please specify)	I eat what I want but I should be more careful really as I eat a fair amount of sweet and fatty food and drink to much alcohol.	Yes (positive test)	None		50	No	No	No	Yes	No	No	No		Other - Please specify	No particular kind or brand. Think I have tried them all at this stage. Whatever pair is nearest at hand.	Heart Rate Variability		Ankle Injury,Blisters,Calf Injury,Heat Exhaustion,Hip Injury,Knee Injury,Muscle Pull,Morton's Neuroma,Plantar Fasciitis,Runners Knee,Shin Splints,Stress Fracture,Other - Please specify	Had most at some stage but generally not a long term problem or you get to live with the niggles and just ignore them over time.	None		Physiotherapist		Yes	Yes
EN	Europe		Republic of Ireland		Male		50	10	61-80%	2:46-3:00	46	46	0-10	Competition,Continuous performance improvement,It is a way of life,Keeping fit and healthy,Sense of accomplishment,Social life,Travel						Detractor	3	None of these		Regular (including foods from all food groups)		No			80	Yes	Yes	Yes	Yes	Yes	No	No	No	Cushioned,Light weight		Calories,Resting HR,Sleep,Steps,VO2MAX		Blisters,Chafing,Calf Injury,IT Band Syndrome,Muscle Pull,Shin Splints		Compression,Foam Rolling,Ice (Ice packs or cold compresses),Rest,RICE (Rest Ice Compression Elevation)		Physiotherapist		No	No
EN	Europe		Republic of Ireland		Transgender Female		44	5	0-20%	3:46-4:00	33	34	0-10	It is a way of life						Detractor	0	None of these		Regular (including foods from all food groups)		Yes (positive test)	None		70	No	No	Yes	Yes	Yes	No		No	Cushioned		Heart Rate Variability,Resting HR,Sleep		IT Band Syndrome,Plantar Fasciitis,Runners Knee,Tendonitus (Achilles tendinopathy)		Elevation,Foam Rolling,Other - Please Specify	Deep tissue massage	Physiotherapist		No	No
EN	Europe		Northern Ireland		Male		59	351	81-100%	2:31-2:45	46	51	>51	It is a way of life,Keeping fit and healthy,Sense of accomplishment,Social life,To reach certain milestones,Total numbers,Travel				Promoter	10			100 Marathons from your national club,100 Marathon club UK milestones,MCI Ireland club milestones,Mega Marathons,World Mega Marathon ranking 300+		Regular (including foods from all food groups)		Yes (positive test)	Elevated Heart rate,Forced to stop running for a period,Heart Palpitations,Shortness of breath,Unusual fatigue		30	No	No	No	Yes	Yes	No		Yes	Stability		Heart Rate Variability,Steps		Blisters,Chafing,Runners Knee,Shin Splints,Stress Fracture		Compression,Elevation,Foam Rolling,Ice (Ice packs or cold compresses),Rest,Stretching		Physiotherapist		Yes	Yes
EN	Europe		Republic of Ireland		Female		46	71	21-40%	4:01-4:15	32	33	11-20	Continuous performance improvement,It is a way of life,Keeping fit and healthy,Sense of accomplishment,Social life,To reach certain milestones,Total numbers						Detractor	5	100 Marathons from your national club,MCI Ireland club milestones		Regular (including foods from all food groups)		Yes (positive test)	None		32	No	Yes	No	Yes	Yes	Yes	No	No	Light weight		Calories,Heart Rate Variability,Floors,Intensity minutes,Max HR,Pulse Ox,Resting HR,Sleep,Steps,Stress,VO2MAX		Blisters,Chafing,Hypothermia,IT Band Syndrome		Foam Rolling,Ice (Ice packs or cold compresses),Rest,RICE (Rest Ice Compression Elevation),Stretching		Physiotherapist		Yes	No
EN	Europe		Republic of Ireland		Male		39	16	81-100%	3:01-3:15	35	35	0-10	Competition,Continuous performance improvement,It is a way of life,Keeping fit and healthy,Sense of accomplishment,Social life						Detractor	1	None of these		Regular (including foods from all food groups)		Yes (positive test)	None		80	Yes	Yes	Yes	Yes	No	Yes	No		Cushioned,Stability,Light weight,Minimal e.g. Vibram or flip flops		Calories,Intensity minutes,Max HR,Pulse Ox,Respiration,Resting HR,Sleep,Steps,Stress,VO2MAX		Blisters,Chafing,Tendonitus (Achilles tendinopathy)		Foam Rolling,Ice (Ice packs or cold compresses),Rest,Stretching		Physiotherapist		No	No
EN	Europe		Republic of Ireland		Male		38	9	0-20%	3:16-3:30	32	32	0-10	Continuous performance improvement,It is a way of life,Keeping fit and healthy,Sense of accomplishment,To reach certain milestones,Total numbers						Passive	7	MCI Ireland club milestones		Regular (including foods from all food groups)		Yes (positive test)	Elevated Heart rate,Muscle aches,Shortness of breath,Unusual fatigue		40	Yes	No	No	Yes	No	Yes	Yes		Cushioned		Heart Rate Variability,Intensity minutes,Max HR,Resting HR,Sleep,Steps		Blisters,Chafing,IT Band Syndrome		Elevation,Foam Rolling,Rest,Stretching		Physiotherapist		Yes	No
EN	Europe		Other European Country	Spain	Female		46	11	81-100%	3:46-4:00	39	40	0-10	Sense of accomplishment,Social life,To reach certain milestones,Travel						Detractor	5	None of these		Regular (including foods from all food groups)		No			60	Yes	No	Yes	Yes	No	No	No		Stability		Steps		IT Band Syndrome		Accupuncture,Support strapping,Stretching		Physiotherapist		Yes	Yes
EN	Europe		Republic of Ireland		Male		44	140	0-20%	3:46-4:00	25	33	11-20	Continuous performance improvement,Keeping fit and healthy,To reach certain milestones,Travel				Passive	8	Detractor	6	MCI Ireland club milestones		Regular (including foods from all food groups)		Yes (positive test)	None		60	Yes	No	No	Yes	No	Yes	Yes		Stability		None		Blisters,Chafing,Calf Injury,Heat Exhaustion,IT Band Syndrome,Plantar Fasciitis,Runners Knee,Shin Splints		None		Physiotherapist		No	No
EN	Europe		Republic of Ireland		Male		29	38	81-100%	4:01-4:15	19	19	11-20	Keeping fit and healthy,Multi Marahon Series (e.g. 10 in 10 days),Sense of accomplishment,To reach certain milestones,Total numbers,Travel		12 in 12 months				Passive	8	Abbot Marathon Majors 6 stars,Global Marathon challenges,MCI Ireland club milestones		Regular (including foods from all food groups)		Yes (positive test)	None		15	No	No	No	Yes	Yes	No	No	No	Stability		Sleep,Steps,Stress		Ankle Injury,Blisters,Chafing,Calf Injury,IT Band Syndrome,Muscle Pull,Runners Knee,Shin Splints,Stress Fracture		Accupuncture,Compression,Pain Relief,Stretching		Physiotherapist		No	No
EN	Europe		Republic of Ireland		Female		55	61	61-80%	3:46-4:00	40	41	11-20	It is a way of life,Keeping fit and healthy,Multi Marahon Series (e.g. 10 in 10 days),Sense of accomplishment,Total numbers		Back to Back,Other - Please specify	Quadrathon			Detractor	4	MCI Ireland club milestones		Regular (including foods from all food groups)		Probably yes (no positive test)	None		60	No	Yes	Yes	Yes	No	No	No		Cushioned,Light weight		Calories,Heart Rate Variability		Blisters,Chafing,Calf Injury,Muscle Pull,Shin Splints		Compression,Elevation,Ice (Ice packs or cold compresses),Pain Relief,RICE (Rest Ice Compression Elevation),Other - Please Specify	Tens machine and massage gun	No I do not seek professional advise for running injuries		Yes	No
EN	Europe		Wales		Female		57	679	0-20%	4:16-4:30	37	37	41-50	It is a way of life,Social life,Total numbers				Promoter	10			None of these		Other (Please specify)	Don't follow a diet	Probably yes (no positive test)	Elevated Heart rate,Heart Palpitations,Muscle aches,Unusual fatigue		60	No	No	No	Yes	No	No			Cushioned,Motion Control (made to support heavy weight, flat feet or severe overpronation)		None		Blisters,Chafing,IT Band Syndrome		None		Specialist or other- Please detail here:	Sports massage	No	No
EN	Europe		Republic of Ireland		Male		57	45	0-20%	3:31-3:45	32	32	0-10	It is a way of life,Keeping fit and healthy,Sense of accomplishment,Social life,Others - Please specify	can eat more					Detractor	2	None of these		Regular (including foods from all food groups)		Yes (positive test)	None		52	No	No	Yes	Yes	No	No	No		Cushioned		VO2MAX		Blisters,Chafing,Calf Injury,Heat Exhaustion,Knee Injury,Muscle Pull,Plantar Fasciitis,Tendonitus (Achilles tendinopathy),Other - Please specify	little bone under big toe-told it’s a pea sized bone in a tendon	Stretching		No I do not seek professional advise for running injuries		Yes	Yes
EN	Europe		Republic of Ireland		Female		51	11	0-20%	4:01-4:15	44	45	0-10	Keeping fit and healthy,Sense of accomplishment,Travel						Detractor	2	Abbot Marathon Majors 6 stars		Other (Please specify)	Celiac diet.	Yes (positive test)	Elevated Heart rate,Heart Palpitations		50	Yes	No	Yes	Yes	Yes	No		No	Cushioned,Stability		Resting HR,VO2MAX		Ankle Injury,Blisters,Chafing,Calf Injury,Plantar Fasciitis		Compression,Foam Rolling,Ice (Ice packs or cold compresses),Rest,Stretching		Physiotherapist		No	No
EN	Europe		Republic of Ireland		Male		29	41	81-100%	2:46-3:00	20	21	0-10	Continuous performance improvement,It is a way of life,Keeping fit and healthy,Sense of accomplishment,To reach certain milestones,Total numbers,Travel						Detractor	2	None of these		Regular (including foods from all food groups)		Yes (positive test)	None		85	Yes	Yes	Yes	Yes	Yes	No	No	No	Cushioned,Stability,Light weight		Heart Rate Variability,Resting HR,Sleep,Steps,Stress,VO2MAX		Chafing,Plantar Fasciitis		Accupuncture,Foam Rolling,Rest		Physiotherapist		No	No
EN	Europe		Northern Ireland		Female		47	10	0-20%	4:01-4:15	39	39	0-10	It is a way of life,Keeping fit and healthy,Sense of accomplishment,Social life,To reach certain milestones,Travel						Detractor	0	Abbot Marathon Majors 6 stars		Regular (including foods from all food groups)		No			42	No	No	Yes	Yes	No	No	No		Other - Please specify	Neutral with prescription orthotics	Heart Rate Variability,Resting HR,Sleep,Steps		Ankle Injury,Blisters,Chafing,Hip Injury,IT Band Syndrome,Muscle Pull,Runners Knee,Shin Splints		Ice (Ice packs or cold compresses),Rest,RICE (Rest Ice Compression Elevation),Stretching,Other - Please Specify	Strength and conditioning as prehab	Physiotherapist		No	No
EN	Europe		Republic of Ireland		Male		61	197	0-20%	2:46-3:00	20	20	0-10	It is a way of life,Keeping fit and healthy,Sense of accomplishment,Travel				Detractor	5	Detractor	5	None of these		Other (Please specify)	None at this stage of my life!	Yes (positive test)	None		80	No	No	No	Yes	No	No			Cushioned		Heart Rate Variability,Max HR,Resting HR,VO2MAX		Tendonitus (Achilles tendinopathy)		Ice (Ice packs or cold compresses),Rest,RICE (Rest Ice Compression Elevation),Stretching		Physiotherapist,Specialist or other- Please detail here:	Specialist in Santry	No	No
EN	Europe		Republic of Ireland		Female		49	22	0-20%	3:46-4:00	38	39	0-10	Keeping fit and healthy,Sense of accomplishment						Detractor	0	None of these		Regular (including foods from all food groups)		Yes (positive test)	Unusual fatigue		60	Yes	Yes	Yes	Yes	Yes	Yes	No	Yes	Light weight		Heart Rate Variability,Sleep		Blisters,Knee Injury		Pain Relief,Rest,RICE (Rest Ice Compression Elevation),Stretching		Physiotherapist		No	No
EN	Europe		Republic of Ireland		Male		58	115	61-80%	3:16-3:30	46	49	11-20	It is a way of life,Keeping fit and healthy,Sense of accomplishment				Passive	7			MCI Ireland club milestones		Regular (including foods from all food groups)		Yes (positive test)	Muscle aches,Shortness of breath,Unusual fatigue		55	No	Yes	Yes	Yes	No	No	No		Stability		None		Ankle Injury,Blisters,Chafing,Calf Injury,IT Band Syndrome,Knee Injury,Muscle Pull,Runners Knee,Shin Splints,Stress Fracture		Compression,Elevation,Foam Rolling,Ice (Ice packs or cold compresses),Pain Relief,Support strapping,Stretching		Physiotherapist,Specialist or other- Please detail here:	Chiropractor	No	No
EN	Europe		Republic of Ireland		Female		40	25	81-100%	3:46-4:00	27	27	0-10	It is a way of life,Keeping fit and healthy,Sense of accomplishment,Social life						Detractor	5	MCI Ireland club milestones		Regular (including foods from all food groups)		Yes (positive test)	Other (Please specify)	Perhaps not as good as endurance since getting covid but also could be due to returning to running post pregnancy so I’m not sure	80	No	No	Yes	Yes	Yes	Yes		No	Other - Please specify	Neutral	Max HR,Steps		Blisters,Chafing,Plantar Fasciitis,Other - Please specify	Pelvis out of joint post labour	Foam Rolling,Other - Please Specify	Osteopath	Another Medical Professional (e.g. Physician, A&E),Specialist or other- Please detail here:	Osteopath	No	No
EN	Europe		Republic of Ireland		Male		40	14	81-100%	3:31-3:45	20	20	0-10	It is a way of life,Keeping fit and healthy,Sense of accomplishment						Detractor	1	None of these		Regular (including foods from all food groups)		Yes (positive test)	Shortness of breath		40	Yes	Yes	No	Yes	Yes	Yes	No	No	Light weight,Minimal e.g. Vibram or flip flops		Resting HR,Stress,VO2MAX		Ankle Injury,Chafing,Hip Injury,IT Band Syndrome,Knee Injury,Runners Knee,Shin Splints		Compression,Foam Rolling,Ice (Ice packs or cold compresses),RICE (Rest Ice Compression Elevation),Stretching		No I do not seek professional advise for running injuries		No	No
EN	Europe		Republic of Ireland		Male		53	53	61-80%	3:01-3:15	35	35	0-10	Keeping fit and healthy,Sense of accomplishment,Social life						Detractor	2	Abbot Marathon Majors 6 stars		Vegan		Yes (positive test)	Elevated Heart rate		80	Yes	No	Yes	Yes	Yes	No	Yes	No	Stability,Other - Please specify	Carbon plated for races	Calories,Steps,VO2MAX		Blisters,Chafing,Calf Injury,Muscle Pull,Plantar Fasciitis,Runners Knee,Tendonitus (Achilles tendinopathy)		Compression,Ice (Ice packs or cold compresses),Rest,Stretching		Physiotherapist		No	No
EN	Europe		Republic of Ireland		Male		51	49	81-100%	2:46-3:00	37	37	0-10	Continuous performance improvement,It is a way of life,Keeping fit and healthy,Sense of accomplishment,To reach certain milestones						Passive	7	Abbot Marathon Majors 6 stars		Regular (including foods from all food groups)		Yes (positive test)	Elevated Heart rate,Forced to stop running for a period,Shortness of breath		50	Yes	Yes	Yes	Yes	Yes	No	Yes	No	Cushioned,Light weight		Intensity minutes,Max HR,Resting HR,Sleep,Steps,VO2MAX		Ankle Injury,Blisters,Chafing,Calf Injury,Heat Exhaustion,IT Band Syndrome,Muscle Pull,Tendonitus (Achilles tendinopathy)		Foam Rolling,Ice (Ice packs or cold compresses),Rest,RICE (Rest Ice Compression Elevation),Stretching		Physiotherapist		No	No
EN	Europe		Republic of Ireland		Male		41	11	81-100%	3:31-3:45	25	29	0-10	Keeping fit and healthy,Sense of accomplishment,To reach certain milestones,Travel						Detractor	3	Abbot Marathon Majors 6 stars		Regular (including foods from all food groups)		Yes (positive test)	Elevated Heart rate,Unusual fatigue		50	Yes	No	No	Yes	No	Yes	Yes		Cushioned,Light weight		Max HR,Resting HR,Sleep		Calf Injury,Plantar Fasciitis		Ice (Ice packs or cold compresses),RICE (Rest Ice Compression Elevation),Support strapping,Stretching		No I do not seek professional advise for running injuries		No	No
EN	Europe		Republic of Ireland		Female		57	315		3:46-4:00	45	46	21-30	Keeping fit and healthy,Sense of accomplishment,Social life,Travel,Others - Please specify	Weight control. Greater calorie freedom			Detractor	5	Detractor	4	MCI Ireland club milestones		Regular (including foods from all food groups)		Yes (positive test)	Other (Please specify)	None after 8 weeks	70	No	No	No	Yes	No	Yes	No		Cushioned		Max HR,Resting HR		Blisters,Chafing,Calf Injury,Plantar Fasciitis,Shin Splints,Tendonitus (Achilles tendinopathy)		Stretching,Other - Please Specify	Massage and strengthening	Physiotherapist,Specialist or other- Please detail here:	Massage therapist	Yes	Yes
EN	Europe		Northern Ireland		Male		37	69	61-80%	3:46-4:00	27	33	11-20	Sense of accomplishment,Social life,To reach certain milestones,Total numbers						Detractor	5	100 Marathon club UK milestones,MCI Ireland club milestones		Prefer not to say		Yes (positive test)	Forced to stop running for a period,Shortness of breath,Unusual fatigue		50	No	No	Yes	Yes	Yes	No	No	No	Stability		Floors,Intensity minutes,Resting HR,Sleep,Steps,VO2MAX		Blisters,Chafing,Hip Injury,IT Band Syndrome,Knee Injury,Plantar Fasciitis,Runners Knee,Shin Splints,Stress Fracture,Tendonitus (Achilles tendinopathy)		Elevation,Foam Rolling,Rest,RICE (Rest Ice Compression Elevation),Stretching		Physiotherapist,Another Medical Professional (e.g. Physician, A&E)		No	No
EN	Europe		Republic of Ireland		Female		39	21	81-100%	3:31-3:45	30	30	0-10	Continuous performance improvement,It is a way of life,Keeping fit and healthy,Sense of accomplishment,To reach certain milestones						Detractor	6	MCI Ireland club milestones		Regular (including foods from all food groups)		Yes (positive test)	None		35	Yes	No	No	Yes	No	No	No		Cushioned		Calories,Resting HR,Sleep,Steps		Hip Injury,Knee Injury,Runners Knee		Foam Rolling,Ice (Ice packs or cold compresses),Support strapping,Stretching		Physiotherapist		Yes	No
EN	Europe		Northern Ireland		Male		40	60	41-60%	3:16-3:30	33	33	11-20	It is a way of life,Keeping fit and healthy,Sense of accomplishment,Social life,To reach certain milestones,Total numbers						Detractor	0	None of these		Vegetarian (excludes fish, poultry, and meat)		Yes (positive test)	Elevated Heart rate,Muscle aches,Shortness of breath,Unusual fatigue		80	Yes	No	No	Yes	Yes	Yes	Yes	No	Other - Please specify	Carbon plate	Calories,Heart Rate Variability,Max HR,Resting HR,Sleep,Steps,VO2MAX		Ankle Injury,Blisters,Calf Injury,Hip Injury,Runners Knee		Rest		Another Medical Professional (e.g. Physician, A&E)		Yes	No
EN	Europe		Republic of Ireland		Female		41	112	81-100%	4:46-5:00	33	33	11-20	It is a way of life,Keeping fit and healthy,Multi Marahon Series (e.g. 10 in 10 days),Sense of accomplishment,Social life,To reach certain milestones		Back to Back,Other - Please specify	4 in 4	Promoter	10			100 Marathon club UK milestones,Abbot Marathon Majors 6 stars,MCI Ireland club milestones		Regular (including foods from all food groups)		Yes (positive test)	None		20	No	No	Yes	Yes	No	No	No		Stability		None		Blisters,Chafing,Muscle Pull		Compression,Elevation,Foam Rolling,Ice (Ice packs or cold compresses),RICE (Rest Ice Compression Elevation)		No I do not seek professional advise for running injuries		No	No
EN	Europe		Northern Ireland		Male		59	204	0-20%	3:16-3:30	28	28	21-30	Continuous performance improvement,It is a way of life,Keeping fit and healthy,Sense of accomplishment,Social life				Promoter	10	Promoter	10	100 Marathons from your national club,100 Marathon club UK milestones,Marathon Globetrotters,Marathon Maniacs,MCI Ireland club milestones		Regular (including foods from all food groups)		Yes (positive test)	Shortness of breath,Unusual fatigue		120	No	No	Yes	Yes	No	No			Cushioned		Steps		Blisters,Chafing		Pain Relief		Physiotherapist		Yes	No
EN	Europe		Republic of Ireland		Male		49	58	81-100%	3:31-3:45	42	42	0-10	Sense of accomplishment,Social life						Detractor	0	100 Marathons from your national club,MCI Ireland club milestones		Regular (including foods from all food groups)		No			50	No	No	No	Yes	No	No	No		Cushioned		None		Chafing,Plantar Fasciitis		Stretching		Physiotherapist		No	No
EN	Europe		Republic of Ireland		Female		38	60	41-60%	3:31-3:45	22	29	0-10	Continuous performance improvement,Sense of accomplishment,To reach certain milestones						Detractor	6	None of these		Regular (including foods from all food groups)		Yes (positive test)	Muscle aches,Unusual fatigue		85	No	No	Yes	Yes	No	No	No		Stability		Calories,Intensity minutes,Max HR		Muscle Pull,Other - Please specify	Sciatica	Compression,Foam Rolling,Rest		Physiotherapist		Yes	No
EN	Asia	philippines			Female		43	15		>6:00	38	38	0-10	Continuous performance improvement,It is a way of life,Keeping fit and healthy,Sense of accomplishment,Travel						Detractor	0	None of these		Regular (including foods from all food groups)		No			25	No	Yes	No	Yes	No	Yes	No		Stability		Calories,Heart Rate Variability,Max HR,VO2MAX		Knee Injury		Foam Rolling,Ice (Ice packs or cold compresses),Rest,Stretching		No I do not seek professional advise for running injuries		Yes	No
EN	Asia	Philippines			Male		42	83		5:31-5:45	32		0-10	It is a way of life,Keeping fit and healthy,Social life,Travel						Detractor	0	None of these		Regular (including foods from all food groups)		No			50	No	Yes	No	Yes	Yes	No		No	Cushioned		Calories,Sleep		Ankle Injury,Chafing		Accupuncture,Foam Rolling,Stretching		No I do not seek professional advise for running injuries		No	No
EN	Europe		England		Male		25	10	0-20%	2:46-3:00	14	17	0-10	It is a way of life,Social life,Travel						Detractor	0	Abbot Marathon Majors 6 stars		Regular (including foods from all food groups)		No			56	Yes	No	No	Yes	Yes	No	No	No	Cushioned,Stability,Light weight		Other - Please Specify	Running Miles	Blisters,Chafing,Hip Injury,IT Band Syndrome,Plantar Fasciitis,Shin Splints,Stress Fracture		Compression,Elevation,Foam Rolling,Ice (Ice packs or cold compresses),Rest,RICE (Rest Ice Compression Elevation),Stretching		No I do not seek professional advise for running injuries		No	No
EN	North America	Canada			Male		36	21	0-20%	2:46-3:00	30	30	0-10	Competition,Continuous performance improvement,It is a way of life,Keeping fit and healthy,Sense of accomplishment,Travel						Detractor	0	None of these		Regular (including foods from all food groups)		No			110	Yes	Yes	No	Yes	Yes	Yes	No	Yes	Cushioned,Stability		Max HR,Resting HR,Sleep,VO2MAX		Ankle Injury,Blisters,Chafing,Calf Injury,Heat Exhaustion,Hip Injury,IT Band Syndrome,Knee Injury,Plantar Fasciitis,Shin Splints		Compression,Elevation,Foam Rolling,Ice (Ice packs or cold compresses),Rest,RICE (Rest Ice Compression Elevation),Support strapping,Stretching		No I do not seek professional advise for running injuries		No	No
EN	Europe		Northern Ireland		Male		47	145	61-80%	3:16-3:30	35	37	11-20	Continuous performance improvement,It is a way of life,Keeping fit and healthy,Multi Marahon Series (e.g. 10 in 10 days),Sense of accomplishment,Social life,To reach certain milestones,Travel		Other - Please specify	Quadrathon 4 in 4	Passive	8	Detractor	4	100 Marathon club UK milestones,Abbot Marathon Majors 6 stars,Atlas 100-mile club milestones,Marathon Globetrotters		Regular (including foods from all food groups)		Yes (positive test)	Elevated Heart rate		100	Yes	Yes	Yes	Yes	Yes	No		No	Cushioned,Stability		Steps,VO2MAX		Ankle Injury,Blisters,Chafing,Calf Injury,IT Band Syndrome,Plantar Fasciitis,Runners Knee,Shin Splints,Tendonitus (Achilles tendinopathy)		Compression,Elevation,Foam Rolling,Ice (Ice packs or cold compresses),Pain Relief,Rest,RICE (Rest Ice Compression Elevation)		Physiotherapist		Yes	No
EN	Europe		Other European Country	Italy	Male		31	22	0-20%	3:16-3:30	30	26	11-20	Keeping fit and healthy						Detractor	0	None of these		Regular (including foods from all food groups)		No			42	No	Yes	No	Yes	No	No			Stability		Calories		Ankle Injury		Rest		No I do not seek professional advise for running injuries		No	No
EN	Europe		Northern Ireland		Male		59	23	81-100%	3:31-3:45	43	43	0-10	Continuous performance improvement,It is a way of life,Keeping fit and healthy,Sense of accomplishment,To reach certain milestones,Total numbers						Detractor	1	None of these		Prefer not to say		Yes (positive test)	None		33	Yes	Yes	No	Yes	No	No	No		Stability		Calories,Max HR,Resting HR,Steps,VO2MAX		Ankle Injury,Chafing,Calf Injury,Hip Injury,Plantar Fasciitis,Tendonitus (Achilles tendinopathy)		Foam Rolling,Rest,Stretching		Physiotherapist		No	No
EN	North America	USA			Male		53	177	61-80%	3:16-3:30	35	35	0-10	Sense of accomplishment				Promoter	10	Detractor	5	None of these		Regular (including foods from all food groups)		Yes (positive test)	Muscle aches		80	No	No	Yes	No	No				Cushioned		None		Blisters,Other - Please specify	Joint inflammation due to autoimmune disease	Rest		No I do not seek professional advise for running injuries		No	No
EN	Australia/Oceania	Australia			Female		44	187	61-80%	3:31-3:45	34	30	21-30	It is a way of life,Keeping fit and healthy,Sense of accomplishment,Social life,To reach certain milestones,Total numbers				Promoter	10	Promoter	10	100 Marathons from your national club,MCI Ireland club milestones		Regular (including foods from all food groups)		No			50	No	No	Yes	Yes	Yes	No		No	Cushioned		Intensity minutes		Blisters,Chafing,Calf Injury,Heat Exhaustion,Hypothermia,IT Band Syndrome,Muscle Pull,Shin Splints		Pain Relief,Rest,RICE (Rest Ice Compression Elevation)		No I do not seek professional advise for running injuries		No	No
EN
EN	Europe		Northern Ireland		Female		41	31	81-100%	3:31-3:45	25	25	0-10	Sense of accomplishment						Detractor	3	None of these		Prefer not to say		Yes (positive test)	None		60	No	No	Yes	Yes	No	No	No		Stability		Calories,Sleep,Steps,VO2MAX		Blisters		None		No I do not seek professional advise for running injuries		No	No
EN	Europe		England		Female		48	125	61-80%	4:01-4:15	33	32	11-20	Continuous performance improvement,Keeping fit and healthy,Social life				Detractor	0	Detractor	0	None of these		Regular (including foods from all food groups)		No			125	Yes	No	Yes	Yes	Yes	No	No	No	Cushioned,Light weight		Other - Please Specify	Distance and time	Chafing,IT Band Syndrome,Plantar Fasciitis		Rest,Other - Please Specify	Deep tissue massage	Specialist or other- Please detail here:	Sports therapist	No	No
EN	Europe		Northern Ireland		Male		49	16	81-100%	3:46-4:00	46	38	0-10	It is a way of life,Keeping fit and healthy						Detractor	0	None of these		Other (Please specify)	None	Yes (positive test)	Muscle aches,Unusual fatigue		60	No	No	Yes	Yes	No	No	No		Stability		Resting HR		Ankle Injury,Blisters,Chafing,Plantar Fasciitis		Rest		Specialist or other- Please detail here:	Sports masseur	No	No
EN	Europe		Northern Ireland		Female		41	75	81-100%	3:16-3:30	28	35	0-10	Continuous performance improvement,Keeping fit and healthy,Sense of accomplishment,Social life,To reach certain milestones,Travel						Detractor	6	100 Marathons from your national club,Abbot Marathon Majors 6 stars		Regular (including foods from all food groups)		Probably yes (no positive test)	None		50	Yes	No	Yes	Yes	No	Yes	Yes		Light weight		Heart Rate Variability,Resting HR,Sleep,Steps		Blisters,Chafing,Tendonitus (Achilles tendinopathy)		Foam Rolling,Rest,Stretching		Physiotherapist		No	No
EN	Europe		Other European Country	Greece	Male		46	81	0-20%	3:31-3:45	23	24	0-10	Continuous performance improvement,It is a way of life,Keeping fit and healthy,Sense of accomplishment,Social life,Travel						Detractor	2	None of these		Vegetarian (excludes fish, poultry, and meat)		Yes (positive test)	None		70	No	Yes	No	Yes	No	Yes	Yes		Cushioned,Stability,Light weight		Heart Rate Variability,Max HR,Resting HR,Steps		Blisters,Chafing,Hypothermia,Shin Splints		Ice (Ice packs or cold compresses),Rest,RICE (Rest Ice Compression Elevation),Stretching		Physiotherapist,Another Medical Professional (e.g. Physician, A&E)		Yes	No
EN	Europe		England		Female		48	56	41-60%	4:16-4:30	42	42	0-10	It is a way of life,Keeping fit and healthy,Sense of accomplishment,Social life						Detractor	3	None of these		Regular (including foods from all food groups)		No			20	No	No	Yes	Yes	No	No	No		Cushioned		None		Ankle Injury,Blisters,Chafing,Calf Injury,Heat Exhaustion,Hip Injury,Muscle Pull,Runners Knee,Shin Splints		Elevation,Foam Rolling,Ice (Ice packs or cold compresses),Pain Relief,Rest,RICE (Rest Ice Compression Elevation),Stretching		Physiotherapist,Specialist or other- Please detail here:	Chiropractor	No	No
EN	Europe		Republic of Ireland		Male		54	51	81-100%	3:01-3:15	44	45	0-10	Continuous performance improvement,It is a way of life,Keeping fit and healthy,Social life,Travel						Detractor	2	None of these		Regular (including foods from all food groups)		Probably yes (no positive test)	None		120	Yes	Yes	Yes	Yes	No	Yes	Yes		Cushioned,Light weight,Other - Please specify	Spikes	Max HR,Resting HR,Sleep,Other - Please Specify	Weight	Ankle Injury,Blisters,Calf Injury,Heat Exhaustion,Hip Injury,Shin Splints,Stress Fracture,Tendonitus (Achilles tendinopathy)		Ice (Ice packs or cold compresses),Pain Relief,Rest,Stretching		Physiotherapist,Another Medical Professional (e.g. Physician, A&E)		Yes	No
EN	Europe		England		Male		46	22	0-20%	3:16-3:30	36	37	0-10	Continuous performance improvement,It is a way of life,Keeping fit and healthy,Sense of accomplishment						Detractor	0	None of these		Regular (including foods from all food groups)		Yes (positive test)	Forced to stop running for a period,Shortness of breath,Unusual fatigue		30	No	Yes	No	Yes	No	Yes	No		Stability		Max HR,VO2MAX		Ankle Injury,Blisters,Chafing,Calf Injury,IT Band Syndrome,Knee Injury,Muscle Pull,Plantar Fasciitis,Runners Knee,Shin Splints,Stress Fracture		Rest		No I do not seek professional advise for running injuries		Yes	No
EN	Europe		England		Female		43	147	0-20%	3:46-4:00	25	26	0-10	Keeping fit and healthy,Sense of accomplishment,Travel				Detractor	4			None of these		Regular (including foods from all food groups)		Yes (positive test)	Muscle aches,Unusual fatigue		60	No	Yes	Yes	Yes	Yes	No	No	No	Cushioned		Calories,Max HR,Steps		Blisters,Chafing,Calf Injury,Heat Exhaustion,Knee Injury,Muscle Pull,Plantar Fasciitis		Accupuncture,Ice (Ice packs or cold compresses),Rest		Physiotherapist		No	No
EN	Europe		Republic of Ireland		Male		69	602	81-100%	3:01-3:15	19	30	21-30	It is a way of life,To reach certain milestones				Promoter	9			100 Marathons from your national club,MCI Ireland club milestones		Regular (including foods from all food groups)		No			80	No	No	Yes	No	No				Motion Control (made to support heavy weight, flat feet or severe overpronation),Other - Please specify	Plus orthotic inserts!	None		Muscle Pull		Other - Please Specify	Physio/ muscle rub	Physiotherapist		No	No
EN	Europe		England		Female		40	109	61-80%	3:46-4:00	26	26	0-10	It is a way of life,Keeping fit and healthy,Sense of accomplishment,To reach certain milestones				Passive	8	Detractor	3	100 Marathon club UK milestones		Regular (including foods from all food groups)		Yes (positive test)	None		50	No	No	No	Yes	Yes	No	No	Yes	Cushioned		Calories,Heart Rate Variability,Max HR,Resting HR,Sleep,Steps,Stress		Ankle Injury,Blisters,Chafing,Calf Injury,IT Band Syndrome,Knee Injury,Shin Splints		Compression,Elevation,Foam Rolling,Pain Relief,Rest,Support strapping		Physiotherapist		Yes	No
EN
EN	Europe		Republic of Ireland		Female		55	81	61-80%	4:01-4:15	30	30	0-10	It is a way of life,Keeping fit and healthy,Sense of accomplishment,Social life,Total numbers,Travel						Detractor	6	100 Marathons from your national club,MCI Ireland club milestones		Regular (including foods from all food groups)		Yes (positive test)	None		40	No	Yes	No	Yes	Yes	No	No	No	Stability		Heart Rate Variability		Blisters,Chafing,Knee Injury,Tendonitus (Achilles tendinopathy)		Other - Please Specify	Massage	Physiotherapist		Yes	No
EN	Europe		Northern Ireland		Male		50	126	0-20%	2:46-3:00	33	33	0-10	It is a way of life,Keeping fit and healthy,Sense of accomplishment,To reach certain milestones,Total numbers				Promoter	10	Detractor	6	100 Marathons from your national club		Regular (including foods from all food groups)		No			50	No	No	Yes	Yes	Yes	Yes	Yes	Yes	Cushioned		Heart Rate Variability,Resting HR,Sleep,Steps,VO2MAX		Chafing,Calf Injury,Plantar Fasciitis		Accupuncture,Compression,Ice (Ice packs or cold compresses),Stretching		Physiotherapist		No	Yes
EN	Europe		England		Female		60	45	61-80%	5:16-5:30	52	50	0-10	It is a way of life,Keeping fit and healthy						Detractor	4	None of these		Regular (including foods from all food groups)		No			15	No	No	No	No	No				Cushioned		None		Blisters,Heat Exhaustion,Shin Splints		Ice (Ice packs or cold compresses),Pain Relief,Other - Please Specify	Massages	Physiotherapist		No	No
EN	Europe		England		Male		51	320	81-100%	3:16-3:30	21	22	0-10	It is a way of life,Keeping fit and healthy,Sense of accomplishment,Social life,To reach certain milestones,Total numbers,Travel				Promoter	9	Passive	8	100 Marathon club UK milestones,World Mega Marathon ranking 300+		Regular (including foods from all food groups)		No			35	No	No	Yes	No	No				Motion Control (made to support heavy weight, flat feet or severe overpronation)		None		Ankle Injury,Blisters,Hip Injury,Muscle Pull,Tendonitus (Achilles tendinopathy),Other - Please specify	Hamstring pull 2014 , Sciatic nerve c25 years ago	Ice (Ice packs or cold compresses),Pain Relief,Rest,RICE (Rest Ice Compression Elevation),Support strapping		Physiotherapist		Yes	No
EN	Europe		Republic of Ireland		Male		51	201	61-80%	3:16-3:30	37	35	11-20	It is a way of life,Keeping fit and healthy,Social life				Detractor	0	Detractor	0	None of these		Regular (including foods from all food groups)		Probably yes (no positive test)	None		80	No	No	Yes	Yes	Yes	No		No	Cushioned		Heart Rate Variability,Max HR		Knee Injury		Other - Please Specify	Strengthening	Physiotherapist		Yes	No
EN	Europe		Republic of Ireland		Female		54	7	0-20%	4:31-4:45	49	49	0-10	Keeping fit and healthy						Detractor	3	None of these		Regular (including foods from all food groups)		No			50	Yes	No	No	Yes	Yes	No	No	No	Light weight		Calories,Sleep,Steps		None		Accupuncture,Foam Rolling		Physiotherapist		Yes	No
EN	Europe		Republic of Ireland		Male		42	42	81-100%	2:46-3:00	33	33	0-10	It is a way of life,Keeping fit and healthy						Detractor	5	None of these		Regular (including foods from all food groups)		Yes (positive test)	Unusual fatigue		50	Yes	No	Yes	Yes	Yes	No	Yes	No	Cushioned		Resting HR,Steps		None		Compression,Foam Rolling,Rest,Stretching		Physiotherapist		Yes	No
EN	Europe		Republic of Ireland		Male		51	139	81-100%	2:46-3:00	35	35	11-20	Keeping fit and healthy,Sense of accomplishment,To reach certain milestones,Total numbers				Promoter	9	Detractor	4	100 Marathons from your national club,MCI Ireland club milestones		Regular (including foods from all food groups)		Yes (positive test)	None		55	No	No	Yes	Yes	Yes	No	No	No	Stability		None		Ankle Injury,Blisters,Chafing,Calf Injury,Hip Injury,Muscle Pull,Tendonitus (Achilles tendinopathy)		Compression,Foam Rolling,Ice (Ice packs or cold compresses),Rest,RICE (Rest Ice Compression Elevation),Support strapping,Other - Please Specify	Dry needling is also used regularly in last few years	Physiotherapist,Specialist or other- Please detail here:	Had to see a specialist twice over a recurring gluteal and calf issue in past 6 years	No	No
EN	Europe		England		Female		61	309		3:46-4:00	45	45	31-40	Awards,Continuous performance improvement,It is a way of life,Keeping fit and healthy,Multi Marahon Series (e.g. 10 in 10 days),Sense of accomplishment,Social life,To reach certain milestones,Travel		10 in 10 days,52 in 52 weeks,Other - Please specify	4in4	Promoter	10	Promoter	10	100 Marathon club UK milestones,Abbot Marathon Majors 6 stars,MCI Ireland club milestones,World Mega Marathon ranking 300+		Regular (including foods from all food groups)		Yes (positive test)	Forced to stop running for a period,Shortness of breath		25	No	No	No	Yes	Yes	No	No	No	Cushioned		Heart Rate Variability,Max HR,Respiration,Resting HR,Sleep,Steps,VO2MAX		Blisters,Hip Injury,Knee Injury,Stress Fracture,Other - Please specify	broken ribs, broken foot, broken hip	Rest,RICE (Rest Ice Compression Elevation)		Another Medical Professional (e.g. Physician, A&E)		Yes	No
EN	Europe		Other European Country	Germany	Male		51	135	81-100%	4:01-4:15	37	37	11-20	It is a way of life,Social life,Total numbers				Promoter	10	Passive	7	None of these		Regular (including foods from all food groups)		Yes (positive test)	Forced to stop running for a period,Shortness of breath		50	No	No	Yes	Yes	No	No	No		Cushioned		None		None		Stretching		Physiotherapist		No	No
EN	Europe		Other European Country	Italy	Male		42	16	41-60%	3:16-3:30	39	39	0-10	Competition,It is a way of life,Keeping fit and healthy,Travel						Promoter	10	None of these		Regular (including foods from all food groups)		Yes (positive test)	Muscle aches		60	No	Yes	Yes	Yes	No	Yes	No		Cushioned,Stability,Light weight		Max HR,Steps,VO2MAX		Ankle Injury,Blisters,Chafing,Calf Injury		Rest,Stretching		No I do not seek professional advise for running injuries		No	No
EN	Europe		England		Male		53	1000	81-100%	4:01-4:15	39	39	>51	Competition,Continuous performance improvement,It is a way of life,Keeping fit and healthy,Multi Marahon Series (e.g. 10 in 10 days),Running streaks,Sense of accomplishment,Social life,To reach certain milestones,Total numbers		5 in 5 days,10 in 10 days,12 in 12 months,52 in 52 weeks,100 in 100 weeks,Back to Back,Other - Please specify	1005 marathons in 4 years 499@42K , 501@50K+			Detractor	2	50 US states,100 Marathons from your national club,100 Marathon club UK milestones,Global Marathon challenges,Marathon Globetrotters,Marathon Maniacs,Mega Marathons,World Mega Marathon ranking 300+		Regular (including foods from all food groups)		Yes (positive test)	None		5	No	No	Yes	Yes	Yes	No	No	No	Cushioned		None		Blisters,Chafing,Heat Exhaustion		None		No I do not seek professional advise for running injuries		Yes	No
EN	Europe		Northern Ireland		Male		58	342	21-40%	3:31-3:45	39	40	31-40	Awards,Continuous performance improvement,It is a way of life,Keeping fit and healthy,Multi Marahon Series (e.g. 10 in 10 days),Sense of accomplishment,Social life,Total numbers,Travel		10 in 10 days,52 in 52 weeks,100 in 100 weeks,Back to Back		Promoter	9	Promoter	10	100 Marathons from your national club,100 Marathon club UK milestones,Atlas 100-mile club milestones,Global Marathon challenges,Marathon Globetrotters,MCI Ireland club milestones,Mega Marathons,World Mega Marathon ranking 300+		Regular (including foods from all food groups)		No			50	No	No	Yes	Yes	No	No	No		Cushioned,Motion Control (made to support heavy weight, flat feet or severe overpronation),Stability		Heart Rate Variability,Max HR,Pulse Ox,Respiration,Resting HR,Stress,VO2MAX		IT Band Syndrome,Knee Injury,Plantar Fasciitis,Runners Knee,Shin Splints		Accupuncture,Compression,RICE (Rest Ice Compression Elevation),Support strapping		Physiotherapist		No	No
EN	Europe		Northern Ireland		Male		51	5	41-60%	4:16-4:30	47	48	0-10	Continuous performance improvement,It is a way of life,Keeping fit and healthy,Sense of accomplishment,To reach certain milestones						Detractor	3	Abbot Marathon Majors 6 stars		Regular (including foods from all food groups)		No			40	Yes	Yes	Yes	Yes	No	No	No		Cushioned,Light weight		Heart Rate Variability,Max HR,Steps,VO2MAX		Ankle Injury,Blisters,Chafing,Calf Injury,IT Band Syndrome,Knee Injury,Plantar Fasciitis,Tendonitus (Achilles tendinopathy)		Elevation,Foam Rolling,Ice (Ice packs or cold compresses),Pain Relief,Rest,RICE (Rest Ice Compression Elevation),Stretching		Physiotherapist,Specialist or other- Please detail here:	Sports Masseuse	Yes	No
EN	Europe		England		Male		60	949	81-100%	2:46-3:00	18	18	21-30	Competition,It is a way of life,Keeping fit and healthy,Sense of accomplishment,To reach certain milestones,Others - Please specify	To try and set new records			Promoter	10	Passive	7	100 Marathon club UK milestones,World Mega Marathon ranking 300+,Other - Please specify	Guinness world records and world bests	Regular (including foods from all food groups)		Yes (positive test)	None		70	No	Yes	Yes	Yes	No	No	No		Cushioned		Resting HR		Chafing,Calf Injury,Frostbite,Heat Exhaustion,Hypothermia,Muscle Pull,Plantar Fasciitis,Runners Knee,Stress Fracture		Accupuncture,Compression,Foam Rolling,Ice (Ice packs or cold compresses),Rest,RICE (Rest Ice Compression Elevation),Stretching		Physiotherapist		No	No
EN	Europe		England		Female		51	9	0-20%	4:31-4:45	44	45	0-10	It is a way of life,Social life,To reach certain milestones						Detractor	2	Global Marathon challenges		Regular (including foods from all food groups)		Yes (positive test)	None		100	No	No	No	Yes	Yes	No		No	Cushioned		Calories,Heart Rate Variability,Max HR,Resting HR,Sleep,Steps		Blisters,Chafing,IT Band Syndrome,Shin Splints		Pain Relief,Rest,RICE (Rest Ice Compression Elevation)		Physiotherapist		No	Yes
EN	North America	Cayman			Female		43	43	81-100%	3:31-3:45	30	30	0-10	It is a way of life,Sense of accomplishment,To reach certain milestones,Total numbers,Travel						Detractor	3	MCI Ireland club milestones		Regular (including foods from all food groups)		Yes (positive test)	Forced to stop running for a period,Shortness of breath,Unusual fatigue		10	No	No	No	Yes	Yes	No	No	No	Cushioned		None		Blisters,Chafing		Compression,Elevation,Pain Relief,Rest
EN	Europe		England		Female		50	13	21-40%	4:16-4:30	39	39	0-10	Keeping fit and healthy,Sense of accomplishment,Social life,Travel,Others - Please specify	Prefer trails to run in nature, somewhere beautiful. To discover and explore a new area					Detractor	3	None of these		Vegan		Yes (positive test)	Elevated Heart rate,Forced to stop running for a period,Muscle aches,Shortness of breath,Unusual fatigue,Other (Please specify)	Persistent headaches	70	No	No	No	Yes	No	No	No		Light weight		Max HR,Respiration,Resting HR,Sleep,Steps
EN	Europe		Republic of Ireland		Male		53	21	0-20%	3:31-3:45	49	49	11-20	It is a way of life,Keeping fit and healthy,Sense of accomplishment,Social life						Detractor	5	None of these		Prefer not to say		No			50	No	No	Yes	Yes	Yes	No	No		Stability		Heart Rate Variability,Intensity minutes,Max HR,Resting HR		Blisters,Knee Injury,Muscle Pull
EN	Europe		Northern Ireland		Male		50	126	61-80%	3:46-4:00	28	28	0-10	Keeping fit and healthy,Social life,Travel				Promoter	10			100 Marathon club UK milestones,MCI Ireland club milestones		Regular (including foods from all food groups)		No			50	No	No	No	Yes	Yes	No		No	Motion Control (made to support heavy weight, flat feet or severe overpronation)		Calories,Heart Rate Variability		Blisters,Chafing,Hip Injury,Morton's Neuroma,Plantar Fasciitis		Foam Rolling,Rest		Physiotherapist,Another Medical Professional (e.g. Physician, A&E)		No	No
EN	Europe		Republic of Ireland		Male		51	172	0-20%	3:16-3:30	41	41	21-30	It is a way of life,Keeping fit and healthy,Sense of accomplishment,Social life,Travel				Passive	7	Detractor	2	100 Marathons from your national club,MCI Ireland club milestones		Regular (including foods from all food groups)		No			40	No	No	No	Yes	Yes	No	Yes	Yes	Cushioned		Heart Rate Variability,Intensity minutes,Max HR,Respiration,Resting HR,Sleep,Steps,Stress,VO2MAX,Other - Please Specify	Training Status	Blisters,Calf Injury,IT Band Syndrome,Knee Injury,Muscle Pull,Tendonitus (Achilles tendinopathy)		Ice (Ice packs or cold compresses),Other - Please Specify	Physio and regular sports massage Dry Needling	Physiotherapist,Specialist or other- Please detail here:	Chiropractor Sports injury therapist	Yes	No
EN	Europe		England		Male		40	372	81-100%	3:16-3:30	30	30	41-50	It is a way of life,Keeping fit and healthy,Sense of accomplishment,Social life				Promoter	10	Detractor	6	100 Marathons from your national club,100 Marathon club UK milestones,World Mega Marathon ranking 300+		Other (Please specify)	No	Yes (positive test)	None		42	No	No	No	No	No				Light weight		None		Ankle Injury,Blisters,Chafing,Heat Exhaustion,Muscle Pull		Stretching		No I do not seek professional advise for running injuries		No	No
EN	Europe		England		Male		54	218	81-100%	3:16-3:30	40	40	21-30	It is a way of life,Keeping fit and healthy,Sense of accomplishment,Social life				Promoter	10	Passive	7	100 Marathon club UK milestones,Abbot Marathon Majors 6 stars,Global Marathon challenges		Regular (including foods from all food groups)		Yes (positive test)	Unusual fatigue		50	Yes	No	No	Yes	No	Yes	No		Stability		Heart Rate Variability,Max HR,Resting HR,Steps		Calf Injury,Hip Injury,IT Band Syndrome,Plantar Fasciitis		Compression,Stretching,Other - Please Specify	Sports Massage	Specialist or other- Please detail here:	Osteopath	No	No
EN	Europe		Republic of Ireland		Female		49	103	0-20%	3:46-4:00	36	36	11-20	It is a way of life,Keeping fit and healthy,Sense of accomplishment,Travel				Promoter	10	Promoter	9	100 Marathons from your national club,MCI Ireland club milestones,Other - Please specify	12 marathons in 12 months	Regular (including foods from all food groups)		Yes (positive test)	Forced to stop running for a period,Shortness of breath,Other (Please specify)	Toe numbness	50	No	Yes	Yes	Yes	Yes	No	Yes	No	Cushioned		Heart Rate Variability,Resting HR,Steps,Stress		Blisters,Chafing,Knee Injury,Morton's Neuroma		Foam Rolling,Pain Relief,Rest,Other - Please Specify	Specific Physo	Physiotherapist,Another Medical Professional (e.g. Physician, A&E)		Yes	No
EN	Europe		Republic of Ireland		Female		47	63	0-20%	4:01-4:15	44	40	0-10	Awards,Continuous performance improvement,It is a way of life,Keeping fit and healthy,Running streaks,Sense of accomplishment,Social life,To reach certain milestones,Total numbers,Travel						Promoter	10	None of these		Regular (including foods from all food groups)		Yes (positive test)	None		60	No	No	No	Yes	No	Yes			Cushioned,Light weight		Calories,Intensity minutes,Max HR,Respiration,Resting HR,Sleep,Steps		None		Rest		No I do not seek professional advise for running injuries		No	No
EN	Europe		England		Male		58	255	81-100%	3:31-3:45	33	33	21-30	Sense of accomplishment				Detractor	6	Detractor	0	100 Marathon club UK milestones,Mega Marathons		Regular (including foods from all food groups)		No			50	No	No	Yes	Yes	No	No	No		Stability		Heart Rate Variability,Resting HR,Steps		Blisters,Chafing,Heat Exhaustion		Pain Relief,RICE (Rest Ice Compression Elevation)		No I do not seek professional advise for running injuries		Yes	No
EN	Europe		England		Male		34	270	41-60%	3:46-4:00	29	25	21-30	Continuous performance improvement,Keeping fit and healthy,Sense of accomplishment,To reach certain milestones				Promoter	9	Detractor	5	100 Marathon club UK milestones,Global Marathon challenges,World Mega Marathon ranking 300+,Other - Please specify	Completing 12 x 100 milers in a year 🙂	Regular (including foods from all food groups)		Probably yes (no positive test)	Elevated Heart rate,Shortness of breath,Unusual fatigue		90	No	No	No	Yes	No	No	No		Cushioned,Stability		Heart Rate Variability		Blisters,Chafing,Muscle Pull,Tendonitus (Achilles tendinopathy)		Foam Rolling		No I do not seek professional advise for running injuries		No	No
EN	Europe		Republic of Ireland		Male		48	21	0-20%	3:01-3:15	42	42	0-10	It is a way of life,Keeping fit and healthy,Sense of accomplishment,Social life						Detractor	1	None of these		Other (Please specify)	None	No			20	No	No	Yes	Yes	No	No	No		Cushioned		None		Blisters,Calf Injury		Stretching		Physiotherapist		No	No
EN	Europe		Other European Country	Spain	Male		48	10	0-20%	3:16-3:30	45	45	0-10	Continuous performance improvement,It is a way of life,Keeping fit and healthy,Sense of accomplishment,To reach certain milestones,Travel						Detractor	0	None of these		Regular (including foods from all food groups)		No			40	Yes	Yes	No	Yes	Yes	Yes	Yes	No	Cushioned,Stability,Light weight		Heart Rate Variability,Max HR,Resting HR,VO2MAX		Blisters		Elevation,Foam Rolling,Ice (Ice packs or cold compresses),Pain Relief,Rest,Stretching		No I do not seek professional advise for running injuries		No	No
EN	Europe		Republic of Ireland		Male		38	9	0-20%	3:16-3:30	32	32	0-10	It is a way of life,Keeping fit and healthy,Sense of accomplishment,To reach certain milestones,Total numbers						Detractor	6	MCI Ireland club milestones		Regular (including foods from all food groups)		Yes (positive test)	Elevated Heart rate,Muscle aches,Shortness of breath,Unusual fatigue		30	Yes	No	No	Yes	No	Yes	Yes
EN	Europe		Republic of Ireland		Male		54	6	0-20%	3:01-3:15	50	51	0-10	Competition,Continuous performance improvement,It is a way of life,Keeping fit and healthy,Sense of accomplishment,Social life,To reach certain milestones,Travel						Detractor	3	Abbot Marathon Majors 6 stars		Vegan		No			75	Yes	Yes	Yes	Yes	No	Yes	No		Light weight		Heart Rate Variability,Intensity minutes,Max HR,Pulse Ox,Resting HR,Steps,VO2MAX		Ankle Injury,Blisters,Chafing,Calf Injury,Heat Exhaustion,Muscle Pull,Other - Please specify	Back / spinal	Ice (Ice packs or cold compresses),Pain Relief,Rest,Stretching		Physiotherapist,Another Medical Professional (e.g. Physician, A&E)		Yes	No
EN	Europe		England		Male		40	11	81-100%	3:31-3:45	36	37	0-10	Continuous performance improvement,It is a way of life,Sense of accomplishment,Social life						Detractor	6	None of these		Regular (including foods from all food groups)		Yes (positive test)	Elevated Heart rate,Heart Palpitations,Shortness of breath,Unusual fatigue		45	No	Yes	Yes	Yes	Yes	No	No	Yes	Cushioned		None		Chafing,Hip Injury,IT Band Syndrome		Stretching		Physiotherapist		No	No
EN	Europe		Republic of Ireland		Male		51	553	61-80%	3:46-4:00	27	27	>51	Others - Please specify	Raising awareness & Fundraising for Charity			Detractor	5	Detractor	5	100 Marathon club UK milestones,MCI Ireland club milestones		Regular (including foods from all food groups)		No			65	No	Yes	Yes	Yes	No	No	Yes		Cushioned		Steps		Other - Please specify	Sciatica	Compression,Foam Rolling,Stretching,Other - Please Specify	Deep Muscle Massage and Recovery boots,	Physiotherapist,Specialist or other- Please detail here:	Sports Therapist	No	No
EN	Europe		Republic of Ireland		Female		51	207	0-20%	3:46-4:00	35	31	11-20	Social life,Others - Please specify	Meeting like minded people			Detractor	5	Detractor	5	MCI Ireland club milestones		Other (Please specify)	None of the above	Yes (positive test)	None		42	No	No	Yes	Yes	No	No	No		Stability		Steps		Blisters,Plantar Fasciitis		Compression,Rest		No I do not seek professional advise for running injuries		No	No
EN	Europe		Republic of Ireland		Male		38	20	0-20%	3:16-3:30	32	32	0-10	Continuous performance improvement,It is a way of life,Keeping fit and healthy,Social life,To reach certain milestones						Passive	7	None of these		Other (Please specify)	I eat what I want, I burn it all off anyway	Yes (positive test)	Forced to stop running for a period,Shortness of breath,Unusual fatigue		70	No	Yes	Yes	Yes	Yes	No	No	No	Cushioned,Motion Control (made to support heavy weight, flat feet or severe overpronation),Light weight		Max HR,Sleep,Steps,VO2MAX		Ankle Injury,Calf Injury,IT Band Syndrome,Tendonitus (Achilles tendinopathy)		Rest		Physiotherapist		No	No
EN	Europe		Northern Ireland		Male		65	616	81-100%	3:31-3:45	55	55	>51	Awards,Competition,Keeping fit and healthy,Social life,Total numbers,Travel				Promoter	10	Promoter	10	100 Marathon club UK milestones,Abbot Marathon Majors 6 stars,Global Marathon challenges,MCI Ireland club milestones		Prefer not to say		Yes (positive test)	Shortness of breath		60	No	No	Yes	Yes	Yes	No	No	Yes	Cushioned		Resting HR,Sleep		Ankle Injury,Calf Injury,Knee Injury,Plantar Fasciitis,Stress Fracture		Pain Relief,Rest,Stretching		No I do not seek professional advise for running injuries		No	No
EN	Europe		Republic of Ireland		Female		47	9	0-20%	3:31-3:45	40	40	0-10	It is a way of life,Keeping fit and healthy,Sense of accomplishment,Social life,Travel						Detractor	3	None of these		Other (Please specify)	No, I eat healthy food but also sweet stuff (a lot!) and alcohol (not a lot)	Yes (positive test)	Shortness of breath,Unusual fatigue		30	No	No	Yes	Yes	No	No	No		Cushioned,Stability		None		Runners Knee,Shin Splints		Pain Relief,RICE (Rest Ice Compression Elevation)		Physiotherapist		Yes	No
EN	Europe		Republic of Ireland		Male		35	23	81-100%	3:46-4:00	25	26	0-10	Awards,Continuous performance improvement,It is a way of life,Keeping fit and healthy,Sense of accomplishment,To reach certain milestones,Travel,Others - Please specify	I have a disability that affects by balance and coordination. The nurses told my parents that I’d never run marathons so running proves them wrong and gives me a sense of accomplishment and let’s me forget about my disability for a while					Promoter	10	None of these		Regular (including foods from all food groups)		No			40	No	No	No	Yes	Yes	No	No	No	Cushioned,Stability,Light weight		Heart Rate Variability,Intensity minutes,Max HR,Resting HR,Steps		Blisters,Chafing,Knee Injury,Plantar Fasciitis,Runners Knee,Shin Splints,Tendonitus (Achilles tendinopathy)		Foam Rolling,Pain Relief,Rest,Other - Please Specify	Massage	Another Medical Professional (e.g. Physician, A&E)		Yes	No
EN	Europe		England		Female		35	73	41-60%	4:16-4:30	25	25	11-20	It is a way of life,Keeping fit and healthy,Sense of accomplishment,Social life						Detractor	0	None of these		Pesco-vegetarian (includes fish)		No			20	No	No	No	Yes	Yes	No	No	No	Cushioned		None		Heat Exhaustion		None		No I do not seek professional advise for running injuries		Yes	No
EN	Europe		England		Male		34	25	41-60%	3:46-4:00	23	26	0-10	Competition,Continuous performance improvement,It is a way of life,Keeping fit and healthy,Sense of accomplishment,Social life,To reach certain milestones,Total numbers						Detractor	5	None of these		Regular (including foods from all food groups)		No			45	Yes	Yes	Yes	Yes	No	No	No		Minimal e.g. Vibram or flip flops		Intensity minutes,Steps		Blisters,Chafing,Heat Exhaustion,Hip Injury,IT Band Syndrome,Muscle Pull		Rest		Another Medical Professional (e.g. Physician, A&E)		No	No
EN
EN	Europe		England		Female		33	192	21-40%	4:01-4:15	23	23	0-10	Keeping fit and healthy,Sense of accomplishment,Social life				Promoter	10	Detractor	5	100 Marathon club UK milestones,Global Marathon challenges,Mega Marathons		Other (Please specify)	I love all food	No			21	No	No	Yes	Yes	Yes	No		No	Stability		Steps		Blisters,Chafing,Calf Injury,Heat Exhaustion,Hypothermia,IT Band Syndrome,Knee Injury,Muscle Pull		Accupuncture,Compression,Elevation,Pain Relief		No I do not seek professional advise for running injuries		No	No
EN	Europe		England		Male		64	45	81-100%	4:16-4:30	48	53	0-10	It is a way of life,Keeping fit and healthy,Sense of accomplishment,Social life						Detractor	6	Global Marathon challenges		Regular (including foods from all food groups)		Yes (positive test)	None		25	No	No	No	Yes	No	Yes	Yes		Cushioned		Max HR,Resting HR,Sleep,Steps,VO2MAX		Ankle Injury,Blisters,Calf Injury		Foam Rolling,Rest,Support strapping		Physiotherapist		No	No
EN	Europe		England		Female		49	91	21-40%	3:31-3:45	25	39	11-20	Social life						Detractor	0	None of these		Vegetarian (excludes fish, poultry, and meat)		Yes (positive test)	None		50	No	Yes	Yes	Yes	No	No	No		Stability		Resting HR,Sleep		Ankle Injury,Blisters,Knee Injury		Foam Rolling,Stretching		Another Medical Professional (e.g. Physician, A&E)		No	No
EN	Europe		England		Female		52	266	21-40%	4:01-4:15	46	46	>51	Awards,Keeping fit and healthy,Multi Marahon Series (e.g. 10 in 10 days),Running streaks,Sense of accomplishment,Social life,To reach certain milestones		5 in 5 days,10 in 10 days,12 in 12 months,52 in 52 weeks,100 in 100 weeks,Back to Back,Other - Please specify	100 in 52 weeks	Detractor	6	Detractor	4	100 Marathon club UK milestones,Abbot Marathon Majors 6 stars,Global Marathon challenges,Mega Marathons		Regular (including foods from all food groups)		No			90	No	No	Yes	Yes	Yes	No	No	Yes	Stability		Heart Rate Variability,Max HR,Resting HR,Sleep,Steps,VO2MAX		Ankle Injury,Blisters,Chafing,Knee Injury,Other - Please specify	Metatarsalgia	Elevation,Foam Rolling,Ice (Ice packs or cold compresses),Pain Relief,Stretching		No I do not seek professional advise for running injuries		Yes	No
EN	Europe		England		Female		42	7	81-100%	5:16-5:30	38	38	0-10	Keeping fit and healthy,Sense of accomplishment,Others - Please specify	To have something to focus on for training					Detractor	0	None of these		Regular (including foods from all food groups)		Yes (positive test)	Elevated Heart rate,Forced to stop running for a period,Shortness of breath,Unusual fatigue,Other (Please specify)	VO2 max dropped significantly for 3 months	50	No	No	Yes	Yes	No	No	No		Cushioned		Intensity minutes,Steps,VO2MAX		Ankle Injury,Blisters,Chafing,Hip Injury,IT Band Syndrome,Knee Injury,Morton's Neuroma,Runners Knee,Shin Splints		Compression,Elevation,Foam Rolling,Ice (Ice packs or cold compresses),Rest,Support strapping,Stretching		Physiotherapist		No	No
EN	Europe		England		Female		35	51	81-100%	4:31-4:45	25	26	0-10	It is a way of life,Keeping fit and healthy,Sense of accomplishment,Social life,To reach certain milestones,Total numbers,Others - Please specify	Mental health, to prove everyone wrong					Detractor	1	None of these		Vegan		Yes (positive test)	None		15	No	No	Yes	Yes	Yes	No	No	No	Cushioned		Calories,Heart Rate Variability,Intensity minutes,Max HR,Resting HR,Sleep,Steps,VO2MAX		Blisters,Chafing		Stretching		No I do not seek professional advise for running injuries		No	No
EN	Europe		England		Female		42	8	61-80%	4:31-4:45	29	29	0-10	Keeping fit and healthy,Sense of accomplishment						Detractor	1	None of these		Regular (including foods from all food groups)		Yes (positive test)	None		40	Yes	No	No	Yes	Yes	No		No	Cushioned,Light weight		Sleep,Steps		Chafing,Muscle Pull		Foam Rolling,Pain Relief,Rest,Stretching		No I do not seek professional advise for running injuries		No	No
EN	Europe		Wales		Female		53	122	81-100%	4:01-4:15	48	50	>51	Keeping fit and healthy,Sense of accomplishment,Social life,To reach certain milestones,Total numbers				Promoter	10	Detractor	0	100 Marathon club UK milestones,Abbot Marathon Majors 6 stars		Other (Please specify)	No	No			80	No	No	No	Yes	Yes	No		Yes	Cushioned		Max HR,Steps		None		None		No I do not seek professional advise for running injuries		No	No
EN	Europe		England		Female		33	98	0-20%	4:46-5:00	25	28	21-30	Sense of accomplishment,To reach certain milestones						Detractor	0	100 Marathon club UK milestones		Regular (including foods from all food groups)		Probably yes (no positive test)	None		50	Yes	Yes	No	Yes	Yes	No	Yes	No	Cushioned,Light weight		Calories,Heart Rate Variability,Resting HR,Sleep,Steps		Hip Injury,Runners Knee,Other - Please specify	Pelvis inflammation	Rest,Stretching,Other - Please Specify	Osteopathy	Specialist or other- Please detail here:	Osteopath	Yes	No
EN	Europe		England		Female		42	42	81-100%	3:46-4:00	28	28	11-20	It is a way of life,Keeping fit and healthy,Sense of accomplishment,Social life,To reach certain milestones,Total numbers						Detractor	2	100 Marathon club UK milestones,Mega Marathons		Other (Please specify)	No dairy/ eggs due to intolerance	Yes (positive test)	Other (Please specify)	Other than the immediate illness running again after a couple of weeks	56	No	Yes	Yes	Yes	Yes	Yes	No	Yes	Cushioned,Other - Please specify	With orthotics as over pronate and have Morton’s neuroma	Heart Rate Variability,Intensity minutes,Max HR,Resting HR,VO2MAX		Ankle Injury,Blisters,Muscle Pull,Morton's Neuroma,Other - Please specify	Posterior tibial tendonitis due to my feet. Got new orthotics and it recovered despite running marathons on it!	Stretching,Other - Please Specify	Sports massage Podiatry and orthotics Physio advice and corrective excercises	Physiotherapist,Specialist or other- Please detail here:	Podiatrist	No	No
EN	Europe		England		Male		58	514	21-40%	3:01-3:15	30	31	>51	Continuous performance improvement,Multi Marahon Series (e.g. 10 in 10 days),Running streaks,To reach certain milestones,Others - Please specify	Personal challenges and goals	5 in 5 days,10 in 10 days,12 in 12 months,52 in 52 weeks,100 in 100 weeks,Back to Back,Other - Please specify	23 ultras in 23 days	Detractor	5	Detractor	0	World Mega Marathon ranking 300+		Regular (including foods from all food groups)		Yes (positive test)	None		100	No	No	Yes	Yes	No	No	Yes		Motion Control (made to support heavy weight, flat feet or severe overpronation)		Heart Rate Variability,Intensity minutes,Pulse Ox,Respiration,Resting HR,Sleep,Steps,Stress,VO2MAX		Ankle Injury,Blisters,Calf Injury,IT Band Syndrome,Knee Injury,Muscle Pull,Stress Fracture,Tendonitus (Achilles tendinopathy)		Compression,Elevation,Ice (Ice packs or cold compresses),RICE (Rest Ice Compression Elevation)		Physiotherapist		No	No
EN	Europe		Republic of Ireland		Male		55	126	0-20%	3:46-4:00	47	48	11-20	Keeping fit and healthy				Promoter	10	Promoter	10	100 Marathons from your national club,MCI Ireland club milestones		Prefer not to say		No			45	No	No	Yes	Yes	Yes	No		Yes	Stability		Steps		Blisters,Chafing,Shin Splints		Foam Rolling,Rest,Stretching		No I do not seek professional advise for running injuries		Yes	No
EN
EN	Europe		England		Female		48	130	0-20%	4:31-4:45	44	34	31-40	Keeping fit and healthy,Multi Marahon Series (e.g. 10 in 10 days),Sense of accomplishment,Social life,To reach certain milestones		10 in 10 days,52 in 52 weeks,100 in 100 weeks,Back to Back		Promoter	10	Passive	8	100 Marathon club UK milestones,Global Marathon challenges,Mega Marathons		Vegan		Yes (positive test)	None		60	No	No	No	Yes	No	No	No		Cushioned		None		Blisters		Pain Relief,Rest,Other - Please Specify	Regular sports massage	Specialist or other- Please detail here:	I ensure I have a regular massage which seems to help me stay injury free	No	No
EN	Europe		England		Female		48	13	0-20%	4:16-4:30	45	45	0-10	Continuous performance improvement,Keeping fit and healthy,Sense of accomplishment,To reach certain milestones						Detractor	2	None of these		Regular (including foods from all food groups)		Yes (positive test)	Unusual fatigue		40	No	No	No	Yes	Yes	No		Yes	Stability		Calories,Pulse Ox,Resting HR,Steps,VO2MAX		Blisters,Calf Injury,Shin Splints		Compression,Foam Rolling,RICE (Rest Ice Compression Elevation)		Physiotherapist		No	No
EN	Europe		England		Male		51	27	81-100%	4:46-5:00	46	46	0-10	Continuous performance improvement,Keeping fit and healthy,Sense of accomplishment						Detractor	6	Mega Marathons		Regular (including foods from all food groups)		Yes (positive test)	None		40	Yes	Yes	No	Yes	Yes	No	No	Yes	Stability		None		Ankle Injury,Chafing,Calf Injury,Knee Injury,Plantar Fasciitis		Foam Rolling,Stretching		No I do not seek professional advise for running injuries		No	No
EN	Europe		England		Male		52	243	41-60%	4:01-4:15	39	39	11-20	Keeping fit and healthy,Sense of accomplishment,Social life				Detractor	4	Detractor	4	100 Marathon club UK milestones		Other (Please specify)	No	No			90	No	No	No	Yes	No	No	No		Cushioned,Other - Please specify	Zero drop	Floors,Sleep,Steps,Stress		Ankle Injury,Blisters,Chafing,Calf Injury,Heat Exhaustion,Knee Injury,Muscle Pull,Tendonitus (Achilles tendinopathy)		Compression,Elevation,Rest,RICE (Rest Ice Compression Elevation),Support strapping		Specialist or other- Please detail here:	Depends on severity of injury-small strain no assistance sought, achilles injury medical professional & physio	No	No
EN	Europe		England		Male		49	31	81-100%	2:46-3:00	32	33	0-10	Competition,Continuous performance improvement,It is a way of life,Keeping fit and healthy,Sense of accomplishment,Social life,To reach certain milestones,Total numbers,Travel						Detractor	4	None of these		Regular (including foods from all food groups)		Yes (positive test)	Elevated Heart rate,Forced to stop running for a period,Heart Palpitations,Muscle aches,Shortness of breath,Unusual fatigue		40	Yes	Yes	Yes	Yes	No	No	No		Cushioned,Light weight		None		Ankle Injury,Blisters,Chafing,Calf Injury,IT Band Syndrome,Knee Injury,Muscle Pull,Morton's Neuroma,Runners Knee,Shin Splints		Compression,Elevation,Foam Rolling,Ice (Ice packs or cold compresses),Pain Relief,RICE (Rest Ice Compression Elevation),Stretching		Physiotherapist		Yes	Yes
EN	Europe		England		Male		41	5	41-60%	3:46-4:00	36	38	0-10	Continuous performance improvement,Keeping fit and healthy,Sense of accomplishment						Detractor	3	None of these		Regular (including foods from all food groups)		Probably yes (no positive test)	None		70	Yes	No	Yes	Yes	No	Yes	Yes		Cushioned		None		Ankle Injury,Blisters,Frostbite		Pain Relief,Rest		Another Medical Professional (e.g. Physician, A&E)		No	No
EN	Europe		England		Male		48	126	81-100%	3:46-4:00	40	40	11-20	Keeping fit and healthy,Sense of accomplishment,Social life,Travel				Detractor	2	Detractor	2	None of these		Regular (including foods from all food groups)		Yes (positive test)	Forced to stop running for a period,Heart Palpitations,Other (Please specify)	Required operation due to arrhythmia	30	No	No	No	Yes	Yes	Yes	Yes	Yes	Cushioned,Stability		Pulse Ox,Respiration,Sleep,Stress,VO2MAX,Other - Please Specify	Body battery	Ankle Injury,Blisters,Chafing,Calf Injury,Muscle Pull		Foam Rolling,Ice (Ice packs or cold compresses),Other - Please Specify	Where possible, I just keep running!	Physiotherapist		No	Yes
EN	Europe		England		Female		53	24	0-20%	4:01-4:15	45	45	11-20	Keeping fit and healthy,Sense of accomplishment,To reach certain milestones,Total numbers						Detractor	5	Other - Please specify	Mega Marathon working to 25 by end of this year	Regular (including foods from all food groups)		No			30	No	Yes	No	Yes	No	No	No		Stability		Calories,Heart Rate Variability		Blisters,Chafing,Calf Injury,IT Band Syndrome,Knee Injury,Muscle Pull		Elevation,Ice (Ice packs or cold compresses),Pain Relief,Rest,Support strapping,Stretching		Specialist or other- Please detail here:	Sports massage therapist	Yes	No
EN	Europe		England		Female		62	190	21-40%	4:16-4:30	56	54	21-30	It is a way of life,Keeping fit and healthy,Multi Marahon Series (e.g. 10 in 10 days),Sense of accomplishment,Social life		5 in 5 days,10 in 10 days,52 in 52 weeks,Back to Back		Passive	7	Detractor	4	100 Marathon club UK milestones,Mega Marathons		Regular (including foods from all food groups)		Yes (positive test)	None		50	No	No	Yes	No	No				Cushioned		None		Ankle Injury,Blisters,Chafing,Heat Exhaustion,Hip Injury,Muscle Pull,Morton's Neuroma,Shin Splints,Tendonitus (Achilles tendinopathy)		Compression,Elevation,Foam Rolling,Ice (Ice packs or cold compresses),Rest,Support strapping,Stretching		Physiotherapist		No	No
EN	Europe		England		Male		51	35	81-100%	3:31-3:45	38	51	0-10	Keeping fit and healthy,Others - Please specify	I just love to run					Detractor	0	Global Marathon challenges		Regular (including foods from all food groups)		Yes (positive test)	Unusual fatigue		100	No	Yes	Yes	Yes	Yes	Yes	No	Yes	Cushioned		None		Calf Injury,Knee Injury		Elevation,Foam Rolling,Rest		No I do not seek professional advise for running injuries		No	No
EN	Europe		England		Female		41	85	81-100%	4:01-4:15	30	30	11-20	It is a way of life,Keeping fit and healthy,To reach certain milestones,Total numbers						Detractor	4	100 Marathon club UK milestones,Global Marathon challenges		Regular (including foods from all food groups)		Yes (positive test)	Other (Please specify)	loss of taste and smell	10	No	No	No	Yes	No	No	No		Stability		None		Ankle Injury,Chafing,Muscle Pull,Tendonitus (Achilles tendinopathy)		Elevation,Foam Rolling,Ice (Ice packs or cold compresses),Pain Relief,Stretching		Physiotherapist		Yes	No
EN	Europe		England		Male		50	56	61-80%	4:01-4:15		45	11-20	Keeping fit and healthy,Multi Marahon Series (e.g. 10 in 10 days),Sense of accomplishment,Social life,To reach certain milestones		10 in 10 days,12 in 12 months				Detractor	0	Mega Marathons		Other (Please specify)	None	No			70	No	No	No	Yes	Yes	No	No	Yes	Cushioned		Calories,Heart Rate Variability,Max HR,Sleep,Steps,Stress,VO2MAX		Muscle Pull,Shin Splints		Pain Relief,Rest,Stretching		No I do not seek professional advise for running injuries		No	No
EN	Europe		England		Female		46	14	0-20%	5:46:600	45	44	11-20	Keeping fit and healthy,Sense of accomplishment,Social life						Detractor	6	None of these		Regular (including foods from all food groups)		Yes (positive test)	Unusual fatigue		40	No	No	Yes	Yes	No	No	No		Stability		Calories,Intensity minutes,Max HR,Resting HR,Steps,VO2MAX		Blisters,Chafing,Knee Injury,Runners Knee,Shin Splints		Compression,Elevation,Foam Rolling,Ice (Ice packs or cold compresses),Pain Relief,Rest,RICE (Rest Ice Compression Elevation),Support strapping,Stretching		No I do not seek professional advise for running injuries		Yes	No
EN	Europe		England		Female		30	90	81-100%	4:16-4:30	24	24	>51	Awards,It is a way of life,Keeping fit and healthy,Multi Marahon Series (e.g. 10 in 10 days),Sense of accomplishment,Social life,To reach certain milestones,Travel		10 in 10 days,12 in 12 months,52 in 52 weeks,100 in 100 weeks,Back to Back				Detractor	3	100 Marathon club UK milestones,Abbot Marathon Majors 6 stars,Global Marathon challenges,Mega Marathons		Regular (including foods from all food groups)		Yes (positive test)	Muscle aches,Shortness of breath,Other (Please specify)	Tight chest running/ walking long distances	85	No	No	Yes	Yes	Yes	No	No	No	Cushioned		Calories,Resting HR,Steps		Blisters,Chafing,Muscle Pull,Shin Splints		Compression,Elevation,Pain Relief,Rest,Support strapping		No I do not seek professional advise for running injuries		Yes	No
EN	Europe		England		Female		46	90	81-100%	3:46-4:00	32	33	11-20	Keeping fit and healthy,Sense of accomplishment,Social life,To reach certain milestones						Passive	7	100 Marathon club UK milestones,Global Marathon challenges,Mega Marathons		Pesco-vegetarian (includes fish)		Yes (positive test)	None		50	No	No	Yes	Yes	No	No	No		Cushioned		None		Blisters,Calf Injury,Heat Exhaustion,IT Band Syndrome,Knee Injury,Runners Knee		Stretching,Other - Please Specify	Regular remedial massage	Physiotherapist,Specialist or other- Please detail here:	Also remedial massage therapist	No	No
EN	Europe		England		Male		39	31	21-40%	3:16-3:30	37	38	21-30	It is a way of life,Keeping fit and healthy,Multi Marahon Series (e.g. 10 in 10 days),Social life,Total numbers		Back to Back				Passive	7	100 Marathon club UK milestones,Mega Marathons		Regular (including foods from all food groups)		Yes (positive test)	None		50	No	No	No	Yes	Yes	No	No	Yes	Cushioned		Max HR,Sleep,VO2MAX		Chafing		Rest,Stretching		No I do not seek professional advise for running injuries		No	No
EN	Europe		Other European Country	Poland	Female		39	49	61-80%	3:16-3:30	28	28	0-10	Continuous performance improvement,It is a way of life,Keeping fit and healthy,Travel						Detractor	5	None of these		Regular (including foods from all food groups)		No			80	No	Yes	No	Yes	Yes	No	No		Stability		Intensity minutes		None		Compression,Elevation,Ice (Ice packs or cold compresses),Pain Relief,Rest,Stretching		Physiotherapist		Yes	No
EN	Europe		England		Male		53	26	81-100%	4:01-4:15	42	43	0-10	It is a way of life,Keeping fit and healthy,Sense of accomplishment,Social life,Travel						Detractor	5	None of these		Prefer not to say		Yes (positive test)	Unusual fatigue		50	Yes	Yes	Yes	Yes	No	Yes	No		Cushioned		Heart Rate Variability,Intensity minutes,Resting HR,VO2MAX		Blisters,Chafing,Shin Splints		Elevation,Rest,RICE (Rest Ice Compression Elevation)		No I do not seek professional advise for running injuries		No	No
EN	Europe		England		Male		64	78	81-100%	4:16-4:30	55	56	11-20	Competition,It is a way of life,Keeping fit and healthy,Sense of accomplishment,To reach certain milestones,Total numbers,Others - Please specify	Competing at age 64.					Promoter	10	None of these		Regular (including foods from all food groups)		Probably yes (no positive test)	None		50	No	No	Yes	Yes	No	No	No		Cushioned		None		Blisters,Chafing,Other - Please specify	Pulled hamstring.	Rest		No I do not seek professional advise for running injuries		No	No
EN	Europe		England		Male		51	96	41-60%	2:46-3:00	41	41	31-40	Continuous performance improvement,Keeping fit and healthy,Sense of accomplishment,Social life,Total numbers						Passive	7	100 Marathon club UK milestones		Prefer not to say		Yes (positive test)	None		100	No	Yes	Yes	Yes	Yes	No	No	Yes	Stability		None		Chafing,Muscle Pull,Shin Splints		Compression,Foam Rolling,Ice (Ice packs or cold compresses),RICE (Rest Ice Compression Elevation),Stretching		No I do not seek professional advise for running injuries		Yes	No
EN	Europe		England		Female		31	19	81-100%	4:31-4:45	21	21	0-10	Sense of accomplishment,Social life,To reach certain milestones,Total numbers						Detractor	4	None of these		Vegan		Probably yes (no positive test)	None		10	No	No	Yes	Yes	No	No	No		Stability,Light weight		None		Blisters,Chafing		Foam Rolling,Stretching		Physiotherapist,Specialist or other- Please detail here:	Have seen physio for sore muscles that weren't getting better after stretching, foam rolling and massage	No	No
EN	Europe		England		Female		54	13		3:31-3:45	50	50	0-10	Continuous performance improvement						Promoter	10	Other - Please specify	Age group qualifier	Prefer not to say		Yes (positive test)	None		70	No	Yes	No	Yes	No	No			Cushioned,Stability		None		Ankle Injury,Shin Splints		None		Physiotherapist		No	No
EN	Europe		England		Female		38	249	21-40%	3:31-3:45	22	25	>51	Continuous performance improvement,It is a way of life,Keeping fit and healthy,Multi Marahon Series (e.g. 10 in 10 days),Sense of accomplishment,Social life,Travel		10 in 10 days,52 in 52 weeks,100 in 100 weeks,Back to Back		Promoter	9	Detractor	2	100 Marathon club UK milestones,Global Marathon challenges		Pesco-vegetarian (includes fish)		No			100	No	No	No	Yes	No	No	No		Cushioned,Stability		Floors,Resting HR,Steps		Blisters,Chafing,Hip Injury,Knee Injury		Ice (Ice packs or cold compresses),Pain Relief,Rest,RICE (Rest Ice Compression Elevation),Stretching		Physiotherapist		Yes	No
EN	Europe		England		Male		49	45	81-100%	3:31-3:45	35	40	0-10	It is a way of life,Keeping fit and healthy,Multi Marahon Series (e.g. 10 in 10 days),Sense of accomplishment,Total numbers		10 in 10 days,12 in 12 months				Detractor	4	Global Marathon challenges		Regular (including foods from all food groups)		Yes (positive test)	None		30	No	No	Yes	Yes	No	No	No		Cushioned		Calories,Max HR,Resting HR,Steps		Ankle Injury,Blisters,Chafing,Calf Injury,Hip Injury,Knee Injury,Muscle Pull		Foam Rolling,Ice (Ice packs or cold compresses),Stretching		Physiotherapist,Specialist or other- Please detail here:	Bio-mechanics coach	No	No
EN	Europe		England		Male		48	5	0-20%	4:46-5:00	45	45	0-10	Awards,It is a way of life,Keeping fit and healthy,Multi Marahon Series (e.g. 10 in 10 days),Sense of accomplishment		Other - Please specify	100 half marathons in 100 weeks			Passive	8	Global Marathon challenges		Regular (including foods from all food groups)		Yes (positive test)	None		25	No	No	No	Yes	No	No	No		Cushioned		None		Chafing		Rest		No I do not seek professional advise for running injuries		No	No
EN	Europe		England		Male		40	123	81-100%	4:16-4:30	36	37	>51	Keeping fit and healthy,Multi Marahon Series (e.g. 10 in 10 days),Sense of accomplishment,Social life,To reach certain milestones		5 in 5 days,10 in 10 days,12 in 12 months,52 in 52 weeks,100 in 100 weeks,Other - Please specify	100 in 52	Passive	8	Passive	8	100 Marathon club UK milestones,Abbot Marathon Majors 6 stars,Global Marathon challenges		Regular (including foods from all food groups)		Probably yes (no positive test)	None		84	No	No	Yes	Yes	Yes	No	No	Yes	Cushioned		Calories,Floors,Intensity minutes,Resting HR,Steps,VO2MAX		Ankle Injury,Knee Injury		Pain Relief		No I do not seek professional advise for running injuries		Yes	No
EN	Europe		Scotland		Male		58	223	41-60%	3:01-3:15	18	19	11-20	It is a way of life				Detractor	0	Detractor	0	None of these		Pesco-vegetarian (includes fish)		Yes (positive test)	Unusual fatigue		100	No	No	No	Yes	No	No	No		Light weight		None		None		Other - Please Specify	Warm Salt Baths and a rub down with Horse Liniment	No I do not seek professional advise for running injuries		No	No
EN	Europe		Other European Country	Deutschland	Male		57	871	81-100%	2:46-3:00	35	35	>51	Competition,It is a way of life,Keeping fit and healthy,Sense of accomplishment,Social life,Travel				Promoter	10	Detractor	5	100 Marathons from your national club,Global Marathon challenges,World Mega Marathon ranking 300+,Other - Please specify	CountryMarathonClub	Pesco-vegetarian (includes fish)		No			90	No	No	No	Yes	No	No	No		Cushioned,Motion Control (made to support heavy weight, flat feet or severe overpronation)		None		Stress Fracture,Tendonitus (Achilles tendinopathy)		Other - Please Specify	Massage	Physiotherapist,Specialist or other- Please detail here:	Orthopäde	No	No
EN	Europe		England		Female		56	103	81-100%	4:46-5:00	44	44	11-20	Awards,Continuous performance improvement,It is a way of life,Keeping fit and healthy,Multi Marahon Series (e.g. 10 in 10 days),Sense of accomplishment,To reach certain milestones,Travel,Others - Please specify	To be the best that I can be and as part of my fund raising endeavours for Breast Cancer Now	12 in 12 months,Back to Back,Other - Please specify	World Marathon Challenge	Promoter	9			7 continents,7 continents in 7 days,50 US states,100 Marathons from your national club,100 Marathon club UK milestones,Abbot Marathon Majors 6 stars,Global Marathon challenges,Other - Please specify	Alphabet list of countries Northernmost southernmost highest and lowest Running the Seven Seas	Regular (including foods from all food groups)		Yes (positive test)	Unusual fatigue		80	Yes	No	No	Yes	Yes	No		No	Stability		Floors,Intensity minutes,Max HR,Resting HR,Sleep,Steps,Stress,VO2MAX		Ankle Injury,Blisters,Chafing,Calf Injury,Heat Exhaustion,Knee Injury,Muscle Pull,Plantar Fasciitis,Tendonitus (Achilles tendinopathy)		Compression,Elevation,Ice (Ice packs or cold compresses),RICE (Rest Ice Compression Elevation),Support strapping,Stretching,Surgery,Other - Please Specify	Please note correct spelling of acupuncture. It is not spelt accupuncture!	Physiotherapist,Another Medical Professional (e.g. Physician, A&E),Specialist or other- Please detail here:	Podiatrist Sports medicine consultant Specialised surgeons Sports massage therapist Physiotherapist Myself - I am medically trained.	No	Yes
EN
EN	Europe		Other European Country	Germany	Female		43	299	21-40%	3:46-4:00	31	32	>51	It is a way of life,Sense of accomplishment,To reach certain milestones,Total numbers,Travel				Promoter	9	Passive	8	100 Marathons from your national club		Vegetarian (excludes fish, poultry, and meat)		No			42	No	No	Yes	Yes	No	Yes	No		Cushioned,Stability		Heart Rate Variability,Floors,Max HR,Pulse Ox,Resting HR,Sleep,Steps,Stress,VO2MAX		Blisters,Chafing,Muscle Pull,Shin Splints,Tendonitus (Achilles tendinopathy)		Ice (Ice packs or cold compresses),Pain Relief,Rest,Stretching		Physiotherapist		No	No
EN	Europe		England		Female		64	341	0-20%	3:46-4:00	48	49	>51	Social life,Others - Please specify	To raise awareness and funds for charity			Promoter	10	Detractor	6	100 Marathon club UK milestones		Vegetarian (excludes fish, poultry, and meat)		Yes (positive test)	None		84	No	No	Yes	Yes	No	No	No		Motion Control (made to support heavy weight, flat feet or severe overpronation),Stability		None		Blisters,Chafing,Plantar Fasciitis		Accupuncture,Ice (Ice packs or cold compresses)		Physiotherapist		Yes	No
EN	Europe		England		Male		63	261	21-40%	3:31-3:45	46	49	11-20	It is a way of life,Keeping fit and healthy,Sense of accomplishment,Social life,To reach certain milestones,Total numbers				Promoter	10	Detractor	5	100 Marathon club UK milestones		Regular (including foods from all food groups)		Yes (positive test)	None		50	No	Yes	Yes	Yes	No	Yes	No		Motion Control (made to support heavy weight, flat feet or severe overpronation)		Heart Rate Variability,Floors,Max HR,Resting HR,Sleep,Steps,VO2MAX		Ankle Injury,Plantar Fasciitis,Tendonitus (Achilles tendinopathy)		Ice (Ice packs or cold compresses),Pain Relief,Support strapping,Stretching		Physiotherapist		No	Yes
EN	Europe		England		Female		47	103	81-100%	3:46-4:00	37	38	0-10	Sense of accomplishment,Others - Please specify	I’ve retired from marathons now after joining the 100 marathon club in 2021, although I did come out of retirement in 2022 for London as I’d not done it.			Promoter	10			None of these		Regular (including foods from all food groups)		Yes (positive test)	Elevated Heart rate,Forced to stop running for a period,Muscle aches,Shortness of breath,Unusual fatigue		30	No	No	Yes	Yes	No	No	No		Cushioned		None		Ankle Injury,Blisters,Chafing,Calf Injury,Plantar Fasciitis		Compression,Foam Rolling,RICE (Rest Ice Compression Elevation),Stretching		Physiotherapist		Yes	No
EN	Europe		England		Male		57	311	61-80%	3:31-3:45	39	42	21-30	It is a way of life,Keeping fit and healthy,Sense of accomplishment,Social life,Travel				Promoter	9	Detractor	0	100 Marathon club UK milestones,World Mega Marathon ranking 300+		Pesco-vegetarian (includes fish)		Yes (positive test)	Forced to stop running for a period,Heart Palpitations,Muscle aches,Shortness of breath,Unusual fatigue		50	No	No	Yes	Yes	No	No			Stability		Calories,Floors,Max HR,Resting HR,Sleep		None		None		Specialist or other- Please detail here:	podiatrist	No	No
EN	Europe		England		Male		49	165	81-100%	2:46-3:00	35	36	21-30	Competition,Continuous performance improvement,It is a way of life,Keeping fit and healthy,Sense of accomplishment,Travel				Passive	8	Detractor	3	100 Marathon club UK milestones,Abbot Marathon Majors 6 stars,Mega Marathons		Regular (including foods from all food groups)		Yes (positive test)	None		60	Yes	No	No	Yes	No	No	Yes		Light weight		None		Blisters,Chafing,Calf Injury,Hip Injury		Foam Rolling,Stretching,Other - Please Specify	Sports physio	Physiotherapist		No	No
EN	Europe		Other European Country	Greece	Male		43	382	61-80%	3:31-3:45	30	38	41-50	Continuous performance improvement,It is a way of life,Keeping fit and healthy,Sense of accomplishment,Social life,Travel				Passive	8	Passive	8	100 Marathon club UK milestones		Vegetarian (excludes fish, poultry, and meat)		No			42.9	No	No	No	No	No				Light weight		Sleep		None		Pain Relief,Rest,RICE (Rest Ice Compression Elevation),Stretching		No I do not seek professional advise for running injuries		No	No
EN	Europe		England		Male		59	148	21-40%	3:31-3:45	18	18	11-20	Keeping fit and healthy,Sense of accomplishment,To reach certain milestones,Total numbers				Passive	8			None of these		Regular (including foods from all food groups)		Yes (positive test)	None		32	No	No	No	Yes	No	No	No		Other - Please specify	normal running shoes	Steps		Blisters,Chafing,Calf Injury,Plantar Fasciitis		None		No I do not seek professional advise for running injuries		No	No
EN	Europe		England		Male		47	107	81-100%	3:01-3:15	35	35	21-30	Continuous performance improvement,It is a way of life,Keeping fit and healthy,Sense of accomplishment,Travel				Passive	8	Detractor	2	Abbot Marathon Majors 6 stars		Regular (including foods from all food groups)		Yes (positive test)	None		80	No	No	Yes	Yes	No	Yes	Yes		Cushioned,Light weight		Heart Rate Variability,Resting HR,Sleep,Stress,VO2MAX		Blisters,Chafing,IT Band Syndrome,Plantar Fasciitis,Tendonitus (Achilles tendinopathy)		Ice (Ice packs or cold compresses),Pain Relief,Rest,Stretching		Physiotherapist		Yes	No
EN	Europe		England		Male		54	102	61-80%	2:46-3:00	35	35	21-30	Keeping fit and healthy,Multi Marahon Series (e.g. 10 in 10 days),Sense of accomplishment,Social life,Total numbers		5 in 5 days,Back to Back,Other - Please specify	7 in 7	Promoter	9	Detractor	5	100 Marathon club UK milestones		Vegetarian (excludes fish, poultry, and meat)		Yes (positive test)	None		75	No	No	Yes	No	No				Cushioned		None		Blisters,Chafing,Calf Injury,Heat Exhaustion,IT Band Syndrome,Knee Injury,Muscle Pull,Plantar Fasciitis,Runners Knee,Shin Splints,Tendonitus (Achilles tendinopathy),Other - Please specify	Sciatica	Ice (Ice packs or cold compresses),Support strapping,Other - Please Specify	Sports massage	Physiotherapist		No	No
EN	Europe		England		Male		53	103	81-100%	2:46-3:00	42	43	11-20	Awards,Competition,Continuous performance improvement,It is a way of life,Keeping fit and healthy,Sense of accomplishment,Social life,To reach certain milestones,Travel				Passive	8	Passive	8	100 Marathons from your national club,Abbot Marathon Majors 6 stars		Regular (including foods from all food groups)		No			120	No	No	Yes	Yes	No	No	Yes		Cushioned,Light weight		Heart Rate Variability,VO2MAX		Blisters,Chafing,Knee Injury,Muscle Pull,Tendonitus (Achilles tendinopathy)		Ice (Ice packs or cold compresses),RICE (Rest Ice Compression Elevation),Stretching,Other - Please Specify	Tendinitis- insert in work shoes	Physiotherapist		No	No
EN	Europe		England		Female		62	81	81-100%	4:16-4:30	56	56	11-20	Keeping fit and healthy,Sense of accomplishment,To reach certain milestones,Travel						Detractor	5	100 Marathon club UK milestones,Abbot Marathon Majors 6 stars,Marathon Maniacs		Vegetarian (excludes fish, poultry, and meat)		No			50	No	No	Yes	Yes	Yes	No	No	Yes	Light weight		Calories,Heart Rate Variability,Steps		Ankle Injury,Blisters,Calf Injury,Other - Please specify	concussion	Rest,RICE (Rest Ice Compression Elevation),Support strapping,Other - Please Specify	massage	Physiotherapist		No	No
EN	Europe		England		Female		67	350	61-80%	3:46-4:00	58	59	>51	It is a way of life,Keeping fit and healthy,Multi Marahon Series (e.g. 10 in 10 days),Sense of accomplishment,Social life		10 in 10 days,Back to Back		Promoter	10	Detractor	0	World Mega Marathon ranking 300+		Vegan		No			90	No	Yes	Yes	No	No				Light weight		Resting HR,Other - Please Specify	Working heart rate (I.e. MAF HR)	Other - Please specify	grazes, bruises, broken bones - all from tripping over	Elevation,Rest,Stretching		No I do not seek professional advise for running injuries		No	No
EN	Europe		England		Female		61	365	61-80%	3:31-3:45	30	30	11-20	Sense of accomplishment				Detractor	6			100 Marathons from your national club,100 Marathon club UK milestones,Marathon Globetrotters,World Mega Marathon ranking 300+		Vegetarian (excludes fish, poultry, and meat)		No			42	Yes	No	Yes	Yes	No	Yes	No		Cushioned		Heart Rate Variability,Max HR,Resting HR,Sleep,Steps,Stress		Chafing,IT Band Syndrome,Morton's Neuroma		Other - Please Specify	Regular massages	Specialist or other- Please detail here:	Regular massage keeps injuries at bay	No	No
EN	Europe		England		Female		58	189	21-40%	3:31-3:45	44	44	11-20	It is a way of life,Keeping fit and healthy,To reach certain milestones,Total numbers				Promoter	10	Promoter	9	100 Marathons from your national club		Regular (including foods from all food groups)		No			60	No	Yes	No	Yes	No	No	No		Cushioned		None		Blisters,Chafing,Calf Injury,Hypothermia,IT Band Syndrome,Knee Injury,Muscle Pull,Other - Please specify	Haglunds	Pain Relief,Rest,Support strapping,Surgery		Physiotherapist		Yes	Yes
EN	Europe		England		Female		46	90	81-100%	3:46-4:00	37	38	11-20	Keeping fit and healthy,To reach certain milestones,Total numbers						Detractor	5	100 Marathon club UK milestones		Vegetarian (excludes fish, poultry, and meat)		Yes (positive test)	Shortness of breath,Other (Please specify)	Post Covid I have been diagnosed with asthma and now take 5 meds a day. My lungs were scarred and inflamed and I have a very high feNO score.	65	No	No	No	Yes	Yes	No	No	Yes	Cushioned		Calories,Heart Rate Variability,Floors,Intensity minutes,Max HR,Pulse Ox,Respiration,Resting HR,Sleep,Steps,Stress,VO2MAX		Blisters,Chafing,Hip Injury,Plantar Fasciitis		Pain Relief,Other - Please Specify	Regular sports massage	Physiotherapist		Yes	No
EN	Europe		England		Female		49	279	61-80%	3:46-4:00	20	20	31-40	Keeping fit and healthy,Social life,To reach certain milestones				Promoter	10			100 Marathon club UK milestones		Regular (including foods from all food groups)		Yes (positive test)	Shortness of breath,Unusual fatigue		50	No	No	Yes	Yes	No	No	No		Stability		Resting HR,VO2MAX		Ankle Injury,Blisters,Chafing,Hip Injury,Hypothermia,IT Band Syndrome,Knee Injury,Plantar Fasciitis,Tendonitus (Achilles tendinopathy)		RICE (Rest Ice Compression Elevation),Stretching		Physiotherapist		No	No
EN	Europe		Scotland		Male		45	134	81-100%	2:31-2:45	25	28	0-10	It is a way of life,Keeping fit and healthy				Passive	7	Detractor	3	100 Marathon club UK milestones		Regular (including foods from all food groups)		No			70	No	Yes	No	Yes	No	No	No		Stability		Heart Rate Variability,Resting HR,Sleep,Steps		Ankle Injury,Calf Injury,Knee Injury,Shin Splints,Stress Fracture		Foam Rolling,Ice (Ice packs or cold compresses),Rest,RICE (Rest Ice Compression Elevation)		Physiotherapist		No	Yes
EN	Europe		England		Female		61	195	81-100%	3:31-3:45	40	41	11-20	It is a way of life,Keeping fit and healthy,Sense of accomplishment,Social life,Travel				Passive	8	Detractor	5	100 Marathon club UK milestones,Abbot Marathon Majors 6 stars		Other (Please specify)	NONE	Yes (positive test)	None		42	No	No	No	No	No				Light weight		None		Blisters,Chafing,Knee Injury,Shin Splints,Other - Please specify	Dislocated pelvis.	Surgery		Physiotherapist,Another Medical Professional (e.g. Physician, A&E),Specialist or other- Please detail here:	Surgeon for my knee.	No	No
EN	Europe		England		Male		60	216	81-100%	3:01-3:15	20	20	31-40	Keeping fit and healthy,Sense of accomplishment,Total numbers,Travel				Promoter	10	Detractor	3	100 Marathon club UK milestones		Other (Please specify)	No red meat	No			50	No	No	Yes	Yes	No	No	No		Cushioned,Light weight		Heart Rate Variability,Floors,Intensity minutes,Max HR,Pulse Ox,Respiration,Resting HR,Sleep,Steps,Stress,VO2MAX		Calf Injury,Muscle Pull		RICE (Rest Ice Compression Elevation),Stretching		No I do not seek professional advise for running injuries		No	No
EN	Europe		Wales		Female		50	126	21-40%	5:01-5:15	44	44	31-40	Keeping fit and healthy,Sense of accomplishment,Social life,Travel				Detractor	5	Detractor	2	100 Marathon club UK milestones,Global Marathon challenges,Marathon Maniacs		Regular (including foods from all food groups)		Yes (positive test)	Shortness of breath,Unusual fatigue		70	No	No	Yes	Yes	No	No	No		Other - Please specify	Zero drop toe shaped	Sleep,Steps		Ankle Injury,Chafing,Calf Injury,Hip Injury,IT Band Syndrome,Knee Injury		Accupuncture,Support strapping,Other - Please Specify	massage	Physiotherapist		No	No
EN	Europe		England		Male		56	205	61-80%	3:01-3:15	25	25	11-20	Continuous performance improvement,It is a way of life,Keeping fit and healthy,Sense of accomplishment,Social life,Travel				Passive	7	Detractor	6	100 Marathon club UK milestones,Abbot Marathon Majors 6 stars		Regular (including foods from all food groups)		Yes (positive test)	None		65	Yes	Yes	Yes	Yes	Yes	No	No	No	Cushioned,Stability		Resting HR		Ankle Injury,Blisters,Chafing,Calf Injury,Knee Injury,Muscle Pull		RICE (Rest Ice Compression Elevation)		Physiotherapist		No	No
EN	Europe		England		Male		55	85	0-20%	2:46-3:00	34	34	31-40	It is a way of life,Keeping fit and healthy,Social life,Total numbers						Detractor	0	None of these		Vegetarian (excludes fish, poultry, and meat)		No			5	No	No	Yes	Yes	No	No	No		Other - Please specify	Any cheap ones	None		Chafing,Muscle Pull		Foam Rolling,RICE (Rest Ice Compression Elevation)		No I do not seek professional advise for running injuries		No	Yes
EN	Europe		Northern Ireland		Male		50	65	81-100%	3:16-3:30	36	36	11-20	Keeping fit and healthy						Detractor	5	100 Marathon club UK milestones		Regular (including foods from all food groups)		Probably yes (no positive test)	None		3	No	No	No	Yes	Yes	Yes	No	Yes	Cushioned		Resting HR,Sleep		Blisters,Calf Injury,Tendonitus (Achilles tendinopathy)		Compression,Foam Rolling,RICE (Rest Ice Compression Elevation)		Physiotherapist		No	No
EN	Europe		England		Female		25	309	61-80%	3:01-3:15	22	22	>51	Continuous performance improvement,It is a way of life,Keeping fit and healthy,Multi Marahon Series (e.g. 10 in 10 days),Social life,To reach certain milestones,Others - Please specify	To give me a reason to live	5 in 5 days,10 in 10 days,12 in 12 months,52 in 52 weeks,100 in 100 weeks,Back to Back,Other - Please specify	200 in 50 weeks, 23in23days, 20in20days, any there are.	Promoter	10			Global Marathon challenges,World Mega Marathon ranking 300+,Other - Please specify	World Marathon Challenges	Other (Please specify)	Rum and cake	No			180	No	No	No	Yes	No	No	No		Light weight		None		Ankle Injury,Hip Injury,IT Band Syndrome,Knee Injury,Stress Fracture		Pain Relief,Support strapping,Other - Please Specify	Rum	Physiotherapist,Another Medical Professional (e.g. Physician, A&E)		No	No
EN	Europe		England		Male		75	330	21-40%	3:16-3:30	34	34	11-20	Competition,Keeping fit and healthy,Sense of accomplishment,Social life,To reach certain milestones,Travel				Promoter	9	Passive	7	100 Marathons from your national club,100 Marathon club UK milestones,World Mega Marathon ranking 300+		Regular (including foods from all food groups)		Yes (positive test)	None		40	No	Yes	Yes	Yes	No	No	No		Cushioned,Light weight		Calories,Resting HR,Sleep		Ankle Injury,Chafing,Calf Injury,Hip Injury,IT Band Syndrome,Knee Injury,Muscle Pull		Ice (Ice packs or cold compresses),Pain Relief,Rest,Stretching		No I do not seek professional advise for running injuries		Yes	Yes
EN	North America	USA			Male		73	812	61-80%	3:16-3:30	28	28	41-50	Awards,It is a way of life,Keeping fit and healthy,Running streaks,Sense of accomplishment,Social life,To reach certain milestones,Total numbers,Travel				Detractor	2	Detractor	4	7 continents,50 US states,100 Marathons from your national club,100 Marathon club UK milestones,Marathon Globetrotters,Marathon Maniacs,Mega Marathons,World Mega Marathon ranking 300+,Other - Please specify	Canada provinces & territories	Regular (including foods from all food groups)		No			120	Yes	No	No	Yes	No	No	No		Cushioned,Stability,Light weight,Other - Please specify	EXTRA WIDE	Max HR		Ankle Injury,Blisters,Chafing,Calf Injury,Frostbite,Heat Exhaustion,Hip Injury,Hypothermia,Knee Injury,Muscle Pull,Morton's Neuroma,Tendonitus (Achilles tendinopathy),Other - Please specify	Total knee replacement	Pain Relief,Surgery,Other - Please Specify	topical NSAID (Voltaren)	Specialist or other- Please detail here:	Only when I had the TKR, broken ankle, broken patella, and 3 Morton's neuromas	Yes	Yes
EN	Europe		England		Male		45	89	81-100%	3:31-3:45	35	36	21-30	It is a way of life,Keeping fit and healthy,Sense of accomplishment,To reach certain milestones,Total numbers,Travel						Passive	7	100 Marathon club UK milestones,Abbot Marathon Majors 6 stars		Regular (including foods from all food groups)		Yes (positive test)	Forced to stop running for a period,Muscle aches,Unusual fatigue		32	No	No	No	Yes	Yes	No	No	Yes	Stability		Calories,Heart Rate Variability,Steps		Calf Injury,Knee Injury		Stretching,Other - Please Specify	Sports massage	Specialist or other- Please detail here:	Sports massage with training in muscle injuries	No	No
EN	Europe		England		Female		60	202	81-100%	4:46-5:00	39	39	21-30	It is a way of life,Sense of accomplishment,Social life				Passive	7	Detractor	0	100 Marathon club UK milestones		Pesco-vegetarian (includes fish)		Yes (positive test)	Unusual fatigue		25	No	No	Yes	Yes	Yes	Yes	Yes	No	Motion Control (made to support heavy weight, flat feet or severe overpronation)		Heart Rate Variability,Max HR,Resting HR,Sleep		Ankle Injury,Blisters,Chafing,Calf Injury,IT Band Syndrome,Runners Knee		Other - Please Specify	Massage	Specialist or other- Please detail here:	Soft tissue therapist	No	Yes
EN	Europe		England		Female		45	56	81-100%	4:31-4:45	38	38	11-20	It is a way of life,Keeping fit and healthy,Sense of accomplishment,To reach certain milestones,Total numbers						Detractor	2	None of these		Regular (including foods from all food groups)		Yes (positive test)	Unusual fatigue		50	No	No	No	Yes	No	No	No		Cushioned		Steps		Chafing,Muscle Pull		Foam Rolling,Pain Relief		Specialist or other- Please detail here:	Sports massage	Yes	No
EN	Europe		England		Female		57	96	81-100%	4:01-4:15	40	40	0-10	It is a way of life,Keeping fit and healthy,Social life						Detractor	5	None of these		Regular (including foods from all food groups)		Yes (positive test)	Forced to stop running for a period,Muscle aches,Shortness of breath,Unusual fatigue		30	No	No	Yes	Yes	No	No			Stability		None		Ankle Injury,Hip Injury		Pain Relief,RICE (Rest Ice Compression Elevation),Stretching		Physiotherapist		Yes	No
EN	Europe		England		Male		58	213	0-20%	4:16-4:30	51	51	21-30	Keeping fit and healthy,Sense of accomplishment,To reach certain milestones				Promoter	10	Promoter	9	100 Marathon club UK milestones		Regular (including foods from all food groups)		No			55	No	No	No	Yes	Yes	No	No	Yes	Cushioned		VO2MAX		Hip Injury		Other - Please Specify	Physiotherapy	Physiotherapist		Yes	No
EN	Europe		England		Male		56	113	0-20%	4:46-5:00	44	44	11-20	It is a way of life,Keeping fit and healthy,Sense of accomplishment,Social life,Travel				Detractor	6	Detractor	0	100 Marathons from your national club		Regular (including foods from all food groups)		Yes (positive test)	Unusual fatigue		45	No	No	Yes	Yes	Yes	No	Yes	Yes	Stability		Calories,Heart Rate Variability,Steps		Blisters,Chafing,Calf Injury,Heat Exhaustion,Hip Injury,IT Band Syndrome		Foam Rolling,Ice (Ice packs or cold compresses),Stretching,Other - Please Specify	physio	Physiotherapist
EN	Europe		England		Male		46	228	21-40%	3:01-3:15	33	25	21-30	It is a way of life,Keeping fit and healthy,Multi Marahon Series (e.g. 10 in 10 days),Sense of accomplishment		10 in 10 days,Back to Back		Passive	8	Detractor	3	None of these		Prefer not to say		Yes (positive test)	Unusual fatigue		20	No	No	Yes	Yes	No	No	No		Cushioned,Light weight		None		Ankle Injury,Blisters,Chafing,Calf Injury,Hip Injury,Hypothermia,IT Band Syndrome,Knee Injury,Muscle Pull,Runners Knee,Shin Splints,Stress Fracture,Tendonitus (Achilles tendinopathy)		Compression,Elevation,Foam Rolling,Ice (Ice packs or cold compresses),Pain Relief,Rest,RICE (Rest Ice Compression Elevation),Stretching		Physiotherapist,Another Medical Professional (e.g. Physician, A&E)		Yes	Yes
EN	Europe		England		Female		44	137		3:01-3:15	30	30	11-20	Awards,Continuous performance improvement,Keeping fit and healthy,Sense of accomplishment,Social life,Travel				Passive	8	Passive	8	100 Marathons from your national club,100 Marathon club UK milestones		Prefer not to say		Yes (positive test)	None		55	No	No	Yes	Yes	No	No	No		Cushioned		Calories,Steps		None		Foam Rolling,Rest		No I do not seek professional advise for running injuries		No	No
EN	Europe		England		Female		52	129	21-40%	4:16-4:30	40	40	11-20	It is a way of life,Keeping fit and healthy,Sense of accomplishment,Social life,Travel				Detractor	6			100 Marathons from your national club,100 Marathon club UK milestones,Mega Marathons		Regular (including foods from all food groups)		Yes (positive test)	Unusual fatigue		100	No	No	Yes	Yes	Yes	No		Yes	Stability		Calories,Heart Rate Variability,Resting HR,Steps,VO2MAX		Knee Injury		Rest,RICE (Rest Ice Compression Elevation)		Physiotherapist		No	No
EN	Europe		England		Male		56	113	0-20%	4:31-4:45	44	44	11-20	It is a way of life,Keeping fit and healthy,Sense of accomplishment,Social life,Travel				Passive	7	Detractor	1	100 Marathons from your national club		Regular (including foods from all food groups)		Yes (positive test)	Elevated Heart rate,Muscle aches,Unusual fatigue		45	No	No	Yes	Yes	Yes	No	Yes	Yes	Stability		Calories,Heart Rate Variability,Steps		Blisters,Chafing,Calf Injury,Heat Exhaustion,IT Band Syndrome,Knee Injury		Foam Rolling,Rest,Stretching		Physiotherapist		No	No
EN	Europe		England		Male		54	342	81-100%	3:16-3:30	29	29	21-30	It is a way of life,Keeping fit and healthy,Social life,Travel				Passive	7	Passive	8	100 Marathons from your national club,Abbot Marathon Majors 6 stars,World Mega Marathon ranking 300+		Other (Please specify)	Follow no diet	Yes (positive test)	None		100	No	Yes	Yes	Yes	No	No	No		Cushioned		VO2MAX		Ankle Injury,Chafing,Calf Injury,Heat Exhaustion,Plantar Fasciitis,Tendonitus (Achilles tendinopathy)		Compression,Foam Rolling,Ice (Ice packs or cold compresses),RICE (Rest Ice Compression Elevation),Stretching		Specialist or other- Please detail here:	Injury dependant. Referral via GP/musculoskeletal clinic to ROH (Royal Orthopedic Hospital) Sports Injury clinic - all on NHS	Yes	No
EN	Europe		England		Male		54	110	81-100%	4:01-4:15	37	37	21-30	It is a way of life,Keeping fit and healthy,Sense of accomplishment,To reach certain milestones,Total numbers				Passive	8	Passive	7	100 Marathon club UK milestones		Vegan		Yes (positive test)	None		50	No	No	Yes	Yes	Yes	No	No	Yes	Stability		None		Blisters,Chafing,IT Band Syndrome,Muscle Pull,Plantar Fasciitis		Pain Relief,Rest,Stretching		Specialist or other- Please detail here:	Sports massage	Yes	No
EN	Europe		England		Female		32	44	81-100%	5:01-5:15	27	28	21-30	It is a way of life,Keeping fit and healthy,Multi Marahon Series (e.g. 10 in 10 days),Sense of accomplishment,Social life,To reach certain milestones,Total numbers		10 in 10 days,12 in 12 months,52 in 52 weeks,100 in 100 weeks,Back to Back				Detractor	4	100 Marathon club UK milestones,Global Marathon challenges,Mega Marathons		Regular (including foods from all food groups)		Yes (positive test)	None		100	No	No	No	Yes	Yes	No	No	Yes	Cushioned		Resting HR,Steps,VO2MAX		Blisters,Chafing,Heat Exhaustion		Ice (Ice packs or cold compresses),Rest,Stretching		Physiotherapist		No	No
EN	Europe		England		Female		33	470	61-80%	5:01-5:15	25	25	>51	Keeping fit and healthy,Sense of accomplishment,Social life				Promoter	10	Detractor	0	100 Marathons from your national club,100 Marathon club UK milestones,Global Marathon challenges,Mega Marathons,World Mega Marathon ranking 300+		Regular (including foods from all food groups)		Yes (positive test)	None		250	No	No	Yes	Yes	No	No	No		Cushioned,Stability		Calories,Heart Rate Variability,Resting HR,Steps		Ankle Injury,Blisters,Chafing,Heat Exhaustion,Hip Injury,Knee Injury,Runners Knee,Stress Fracture,Tendonitus (Achilles tendinopathy)		Elevation,Ice (Ice packs or cold compresses),Pain Relief,Rest,RICE (Rest Ice Compression Elevation),Support strapping		No I do not seek professional advise for running injuries		Yes	No
EN	Europe		England		Female		42	16	81-100%	4:31-4:45	40	40	11-20	Keeping fit and healthy,Sense of accomplishment						Detractor	2	Mega Marathons		Regular (including foods from all food groups)		Yes (positive test)	None		50	No	Yes	No	Yes	Yes	Yes	No	Yes	Cushioned		Heart Rate Variability,Resting HR,Sleep,Steps		Ankle Injury		None		Physiotherapist		No	No
EN	Europe		England		Male		65	194	81-100%	3:01-3:15	28	28	11-20	Keeping fit and healthy,Sense of accomplishment,Travel				Detractor	6	Detractor	4	100 Marathons from your national club		Regular (including foods from all food groups)		Yes (positive test)	None		75	No	No	Yes	Yes	No	Yes	No		Cushioned		None		Blisters,Chafing,Calf Injury,Knee Injury,Muscle Pull,Plantar Fasciitis,Runners Knee,Other - Please specify	Groin strain	None		Physiotherapist		No	Yes
EN	Europe		England		Male		53	45	81-100%	3:46-4:00	39	39	21-30	Keeping fit and healthy,Sense of accomplishment,To reach certain milestones,Total numbers						Detractor	5	100 Marathons from your national club		Regular (including foods from all food groups)		No			50	No	Yes	Yes	Yes	No	No	No		Stability		None		Hip Injury,IT Band Syndrome,Knee Injury,Plantar Fasciitis		Pain Relief,Rest,Stretching		Physiotherapist		No	No
EN	Europe		England		Female		45	41	81-100%	4:16-4:30	40	41	21-30	To reach certain milestones						Detractor	5	100 Marathon club UK milestones		Regular (including foods from all food groups)		Probably yes (no positive test)	Shortness of breath		40	No	No	Yes	Yes	Yes	No	No	Yes	Cushioned		Max HR,Resting HR,Sleep,Steps		Blisters,Chafing,Plantar Fasciitis,Shin Splints		Compression,Foam Rolling,Pain Relief,Rest,RICE (Rest Ice Compression Elevation)		No I do not seek professional advise for running injuries		Yes	No
EN	Europe		England		Male		26	176	81-100%	4:16-4:30	16	19	>51	It is a way of life,Keeping fit and healthy,Sense of accomplishment,Social life,To reach certain milestones,Total numbers				Promoter	10	Promoter	10	100 Marathons from your national club,100 Marathon club UK milestones,Global Marathon challenges,Mega Marathons		Regular (including foods from all food groups)		Probably yes (no positive test)	Muscle aches,Unusual fatigue		42.2	No	No	Yes	Yes	No	No	No		Cushioned		None		Blisters,Chafing,Knee Injury		Pain Relief,Support strapping,Stretching		No I do not seek professional advise for running injuries		Yes	No
EN	Europe		Republic of Ireland		Female		43	25	81-100%	5:16-5:30	28	30	0-10	Keeping fit and healthy,Sense of accomplishment,Social life						Detractor	5	100 Marathons from your national club,MCI Ireland club milestones		Other (Please specify)	Wheat free allergy	No			15	No	No	No	Yes	Yes	No	No	No	Cushioned		Calories,Steps		Chafing,Knee Injury,Muscle Pull,Plantar Fasciitis,Shin Splints		Compression,Other - Please Specify	Vaseline for chaffing	No I do not seek professional advise for running injuries		Yes	No
EN
EN	Europe		England		Female		50	353	0-20%	3:31-3:45	30	30	31-40	It is a way of life				Promoter	9	Promoter	9	100 Marathons from your national club,100 Marathon club UK milestones,Global Marathon challenges,World Mega Marathon ranking 300+		Regular (including foods from all food groups)		Yes (positive test)	None		100	No	No	No	No	No				Cushioned		None		None		Compression		Physiotherapist		Yes	No
EN	Europe		England		Male		38	124		4:01-4:15	33	33	31-40	It is a way of life,Keeping fit and healthy,Running streaks,Sense of accomplishment,Social life,To reach certain milestones				Promoter	10			100 Marathon club UK milestones,Mega Marathons		Regular (including foods from all food groups)		Yes (positive test)	Forced to stop running for a period,Shortness of breath,Unusual fatigue,Other (Please specify)	Since having covid 06/12/2021 I'm now have bad asthma	1	No	No	No	Yes	No	No	No		Cushioned,Stability		Resting HR,Sleep,Steps,Stress,VO2MAX		Blisters,Chafing,Knee Injury		Elevation,Foam Rolling,Ice (Ice packs or cold compresses),Rest,RICE (Rest Ice Compression Elevation),Support strapping		No I do not seek professional advise for running injuries		No	No
EN	Europe		Republic of Ireland		Male		59	130	81-100%	3:46-4:00	41	42	11-20	Keeping fit and healthy,Sense of accomplishment,Others - Please specify	Friendship			Detractor	6	Detractor	3	MCI Ireland club milestones		Other (Please specify)	None	Yes (positive test)	None		8	No	No	Yes	Yes	No	No	No		Cushioned		None		Blisters,Muscle Pull		Rest		Physiotherapist		Yes	No
EN	Europe		Northern Ireland		Female		59	140	81-100%	4:01-4:15	48	43	21-30	Sense of accomplishment,Social life				Passive	8	Detractor	6	None of these		Regular (including foods from all food groups)		Yes (positive test)	Unusual fatigue		40	No	No	No	Yes	Yes	No	No	Yes	Cushioned		None		Blisters,Chafing,Knee Injury		Compression,Pain Relief,RICE (Rest Ice Compression Elevation),Support strapping		No I do not seek professional advise for running injuries		Yes	No
EN	Europe		England		Female		57	441	21-40%	3:01-3:15	29	29	41-50	It is a way of life				Passive	8			100 Marathon club UK milestones		Other (Please specify)	General mix of good home cooked foods	Probably yes (no positive test)	Muscle aches,Shortness of breath,Unusual fatigue		20	No	No	Yes	Yes	No	No	No		Cushioned,Stability		Heart Rate Variability,Max HR		Ankle Injury,Chafing,Heat Exhaustion,Hypothermia,IT Band Syndrome,Muscle Pull,Plantar Fasciitis,Shin Splints,Stress Fracture		Accupuncture,Compression,Elevation,Foam Rolling,Ice (Ice packs or cold compresses),Pain Relief,Rest,RICE (Rest Ice Compression Elevation),Support strapping,Stretching		No I do not seek professional advise for running injuries		Yes	Yes
EN	Europe		England		Male		60	148	81-100%	3:16-3:30	36	38	0-10	Keeping fit and healthy,Sense of accomplishment,Social life				Passive	8			None of these		Regular (including foods from all food groups)		Yes (positive test)	None		65	No	No	Yes	Yes	Yes	No	No	Yes	Light weight		Resting HR,VO2MAX		Ankle Injury,Blisters,Chafing,Calf Injury,IT Band Syndrome,Muscle Pull,Plantar Fasciitis,Tendonitus (Achilles tendinopathy)		Rest		Physiotherapist,Another Medical Professional (e.g. Physician, A&E)		No	No
EN	Europe		Northern Ireland		Female		50	16	81-100%	3:16-3:30	27	29	0-10	Continuous performance improvement,Sense of accomplishment,Social life,Travel,Others - Please specify	Testing my limits, escapism from work stress					Detractor	1	None of these		Pesco-vegetarian (includes fish)		Yes (positive test)	None		70	Yes	No	Yes	Yes	Yes	Yes	No	No	Stability		Max HR,Steps,VO2MAX		Blisters,Chafing,IT Band Syndrome,Knee Injury,Runners Knee,Stress Fracture		Rest,RICE (Rest Ice Compression Elevation),Other - Please Specify	Anti inflammatories, chiropractic treatment, sometimes sports massage from specialist	Physiotherapist,Specialist or other- Please detail here:	Chiropractor and sports therapist- i find both far better than physios	No	Yes
EN	Europe		Republic of Ireland		Male		68	10	0-20%	3:46-4:00	53	59	0-10	Continuous performance improvement,It is a way of life,Keeping fit and healthy,Sense of accomplishment,Others - Please specify	Longevity, stress elimination, connecting with Mother Nature, example to others					Detractor	5	MCI Ireland club milestones		Other (Please specify)	Ketogenic diet for about a year, then revert to a whole food, organic balanced diet with more carbs than KETO. Then back to Keto	Yes (positive test)	Shortness of breath,Unusual fatigue		35	Yes	Yes	No	Yes	Yes	No	No	Yes	Stability,Light weight		Intensity minutes,Steps		Muscle Pull,Shin Splints,Stress Fracture		Elevation,Ice (Ice packs or cold compresses),Rest,Stretching,Other - Please Specify	Thai deep muscle massage	No I do not seek professional advise for running injuries		No	No
EN	Europe		England		Male		44	48	0-20%	>6:00	36	38	11-20	Keeping fit and healthy,Running streaks,Sense of accomplishment,Social life						Detractor	6	Mega Marathons		Regular (including foods from all food groups)		No			30	No	No	No	Yes	No	No			Cushioned		Calories,Heart Rate Variability,Max HR,Resting HR		Blisters,Heat Exhaustion,Shin Splints		Compression,Elevation,Foam Rolling,Ice (Ice packs or cold compresses),Rest,Stretching		No I do not seek professional advise for running injuries		No	No
EN	Europe		Republic of Ireland		Male		68	86	81-100%	2:31-2:45	25	25	0-10	Continuous performance improvement,It is a way of life,Sense of accomplishment						Detractor	3	None of these		Regular (including foods from all food groups)		Yes (positive test)	Muscle aches,Shortness of breath,Unusual fatigue		65	Yes	Yes	Yes	Yes	No	No	No		Stability		Heart Rate Variability,Resting HR,Sleep		Calf Injury,Heat Exhaustion,Tendonitus (Achilles tendinopathy)		Rest,Stretching,Other - Please Specify	Muscle strengthening.	Physiotherapist,Specialist or other- Please detail here:	Sports therapist. Very seldom use any of these.	No	No
EN	Europe		Republic of Ireland		Female		49	19	81-100%	3:46-4:00	46	46	0-10	Keeping fit and healthy						Detractor	1			Other (Please specify)	None	No			50	No	Yes	Yes	Yes	Yes	No			Stability		None		None		Foam Rolling		No I do not seek professional advise for running injuries		No	No
EN	Europe		Republic of Ireland		Male		60	195	81-100%	3:31-3:45	39	39	21-30	It is a way of life,Social life,Travel				Detractor	4	Detractor	1	Other - Please specify	My own club acknowledged 100 marathons.	Vegan		Yes (positive test)	None		70	Yes	Yes	Yes	Yes	No	No			Cushioned		Calories,Sleep		Plantar Fasciitis		Rest,Stretching		No I do not seek professional advise for running injuries		No	No
EN	Europe		Republic of Ireland		Male		55	83	61-80%	2:46-3:00	42	42	0-10	It is a way of life,Keeping fit and healthy,Social life,Travel						Detractor	1	Abbot Marathon Majors 6 stars		Regular (including foods from all food groups)		Yes (positive test)	None		55	No	No	No	Yes	Yes	No	Yes	No	Light weight		Resting HR,Sleep,VO2MAX		Other - Please specify	Hamstring	Rest,Stretching		No I do not seek professional advise for running injuries		No	No
EN	Europe		Republic of Ireland		Male		42	3	0-20%	4:16-4:30	42	42	0-10	Others - Please specify	It's a great madness					Detractor	5	None of these		Prefer not to say		Yes (positive test)	None		20	No	Yes	Yes	Yes	No	No			Stability		Calories,Heart Rate Variability,Sleep,Steps,VO2MAX		None		Rest		No I do not seek professional advise for running injuries		Yes	No
EN	Europe		England		Male		53	53	81-100%	3:31-3:45	28	38	0-10	Competition,Continuous performance improvement,Keeping fit and healthy,Sense of accomplishment,To reach certain milestones,Total numbers						Passive	7	None of these		Regular (including foods from all food groups)		Yes (positive test)	None		50	No	No	Yes	Yes	Yes	Yes	No	Yes	Cushioned,Light weight		Heart Rate Variability,Floors,Intensity minutes,Max HR,Resting HR,Sleep,Steps,VO2MAX		Blisters,Chafing,Plantar Fasciitis,Runners Knee,Other - Please specify	Tight back	Accupuncture,Foam Rolling,Pain Relief,Rest,Support strapping,Stretching		Physiotherapist		No	No
EN	Europe		Other European Country	Germany	Male		64	466	81-100%	3:16-3:30	41	42	21-30	It is a way of life,Keeping fit and healthy,Sense of accomplishment,Social life				Passive	7	Passive	7	100 Marathons from your national club		Regular (including foods from all food groups)		Probably yes (no positive test)	Forced to stop running for a period		30	No	No	No	No	No				Cushioned		None		Blisters		None		No I do not seek professional advise for running injuries		No	No
EN	Europe		Other European Country	Germany	Male		53	155	0-20%	3:16-3:30	26	29	0-10	It is a way of life,Keeping fit and healthy,Social life,Total numbers,Travel				Detractor	3	Detractor	4	100 Marathons from your national club		Regular (including foods from all food groups)		Yes (positive test)	None		40	No	No	Yes	Yes	No	No	Yes		Cushioned		None		Other - Please specify	high blood pressure	None		Another Medical Professional (e.g. Physician, A&E)		No	No
EN	Europe		England		Female		35	131	61-80%	5:16-5:30	29	29	21-30	It is a way of life,Keeping fit and healthy,Sense of accomplishment,Social life				Passive	8	Detractor	1	100 Marathons from your national club,Mega Marathons		Regular (including foods from all food groups)		Yes (positive test)	Elevated Heart rate,Forced to stop running for a period,Shortness of breath,Unusual fatigue		20	No	No	No	Yes	No	No	No		Cushioned,Stability		Calories,Floors,Intensity minutes,Resting HR,Sleep,Steps		Blisters,Chafing,Calf Injury,Hip Injury,Muscle Pull,Shin Splints,Tendonitus (Achilles tendinopathy)		Ice (Ice packs or cold compresses),Other - Please Specify	Osteopathy	Specialist or other- Please detail here:	Osteopath Podiatrist	Yes	No
EN	Europe		England		Male		55	120	41-60%	3:01-3:15	19	24	0-10	Keeping fit and healthy,Others - Please specify	Because I can			Detractor	0			Abbot Marathon Majors 6 stars		Vegetarian (excludes fish, poultry, and meat)		Probably yes (no positive test)	None		80	No	No	Yes	Yes	No	No			Cushioned		None		Blisters,Plantar Fasciitis,Shin Splints		Pain Relief		No I do not seek professional advise for running injuries		Yes	No
EN	Europe		England		Female		51	69	81-100%	4:31-4:45	34	34	21-30	Sense of accomplishment,To reach certain milestones						Detractor	5	Mega Marathons		Regular (including foods from all food groups)		No			40	No	No	No	Yes	Yes	No	No	No	Cushioned		Sleep,Steps		Ankle Injury,Blisters,Chafing,Calf Injury,Shin Splints,Tendonitus (Achilles tendinopathy)		Elevation,Rest		No I do not seek professional advise for running injuries		Yes	No
EN	Europe		Other European Country	Germany	Male		64	414	81-100%	3:01-3:15	31	31	11-20	Total numbers				Promoter	9	Passive	7	7 continents,100 Marathons from your national club,World Mega Marathon ranking 300+		Prefer not to say		Yes (positive test)	None		50	No	No	No	Yes	No	No			Stability		None		Runners Knee,Shin Splints		Ice (Ice packs or cold compresses)		Physiotherapist		No	No
EN	Europe		Other European Country	Germany	Female		70	324	81-100%	5:16-5:30	40	40	11-20	Travel				Promoter	10			100 Marathons from your national club		Regular (including foods from all food groups)		Yes (positive test)	None		30	Yes	No	No	No	Yes			No	Stability		None		Knee Injury		Ice (Ice packs or cold compresses)		Physiotherapist		No	No
EN	Europe		Other European Country	Germany	Male		66	959	21-40%	3:16-3:30	30	33	31-40	It is a way of life,Keeping fit and healthy,Social life,Total numbers,Travel				Detractor	3	Detractor	3	100 Marathons from your national club,World Mega Marathon ranking 300+		Other (Please specify)	no dier	Yes (positive test)	None		100	No	No	Yes	Yes	No	No	No		Other - Please specify	normal shoes	Calories,Heart Rate Variability,Floors,Intensity minutes,Max HR,Pulse Ox,Resting HR,Sleep,Steps		Muscle Pull,Other - Please specify	erythrma food	Other - Please Specify	Gymnastics are very important	No I do not seek professional advise for running injuries		No	No
EN	Europe		Other European Country	Germany	Male		52	161	61-80%	2:46-3:00	42	42	11-20	Continuous performance improvement,It is a way of life,Keeping fit and healthy,Social life				Detractor	3	Detractor	2	100 Marathons from your national club		Regular (including foods from all food groups)		Yes (positive test)	None		50	No	No	No	Yes	No	No	No		Light weight,Minimal e.g. Vibram or flip flops		None		Calf Injury,Tendonitus (Achilles tendinopathy)		Foam Rolling,Rest		No I do not seek professional advise for running injuries		No	Yes
EN	Europe		Republic of Ireland		Male		48	226	61-80%	3:31-3:45	38	35	11-20	It is a way of life,Keeping fit and healthy,Social life				Passive	8	Passive	8	MCI Ireland club milestones		Other (Please specify)	None	Yes (positive test)	Unusual fatigue		60	No	No	Yes	Yes	No	No	No		Stability,Minimal e.g. Vibram or flip flops		Max HR		Ankle Injury,Blisters,Chafing,Muscle Pull,Shin Splints		Accupuncture,Rest,Other - Please Specify	Massage	Physiotherapist		No	No
EN	Europe		Other European Country	Germany	Male		54	802	61-80%	2:46-3:00	27	27	>51	Keeping fit and healthy,To reach certain milestones,Total numbers,Travel				Promoter	10	Passive	8	100 Marathons from your national club,Mega Marathons,World Mega Marathon ranking 300+		Regular (including foods from all food groups)		Yes (positive test)	None		85	No	Yes	No	Yes	No	No	No		Cushioned		Calories,Sleep		Blisters,Hip Injury,Knee Injury		Elevation,Rest,Surgery		Another Medical Professional (e.g. Physician, A&E)		No	No
EN	Europe		Other European Country	Germany	Male		71	1000	61-80%	3:01-3:15	21	23	41-50	It is a way of life,Keeping fit and healthy,Sense of accomplishment,Social life,To reach certain milestones,Total numbers,Travel						Detractor	5	100 Marathons from your national club,World Mega Marathon ranking 300+,Other - Please specify	Counry Club Marathon	Other (Please specify)	no diet	Yes (positive test)	None		20	No	No	No	Yes	No	No	No		Cushioned,Stability		Max HR,Steps		Runners Knee,Shin Splints,Tendonitus (Achilles tendinopathy)		None		Physiotherapist		No	Yes
EN	Europe		England		Male		70	551	81-100%	3:01-3:15	41	41	21-30	It is a way of life,Keeping fit and healthy,Sense of accomplishment,Social life,To reach certain milestones,Travel				Promoter	10	Passive	7	50 US states,100 Marathons from your national club,100 Marathon club UK milestones,Marathon Globetrotters,Other - Please specify	13 Canadian Provinces and Territories	Vegetarian (excludes fish, poultry, and meat)		Yes (positive test)	None		40	No	No	Yes	Yes	No	No	No		Cushioned		Calories,Heart Rate Variability,Resting HR		Ankle Injury,Blisters,Calf Injury,Knee Injury,Shin Splints		Accupuncture,Foam Rolling,RICE (Rest Ice Compression Elevation),Stretching		Physiotherapist		No	Yes
EN	Europe		Other European Country	Italia	Male		61	523	81-100%	4:31-4:45	50	50	21-30	Social life				Passive	8			World Mega Marathon ranking 300+		Regular (including foods from all food groups)		No			40	No	No	Yes	Yes	No	No	No		Light weight		Calories		None		None		Physiotherapist		No	No
EN	Europe		Other European Country	Germany	Male		70	1000	41-60%	3:01-3:15	32	32	41-50	It is a way of life,Keeping fit and healthy,Multi Marahon Series (e.g. 10 in 10 days),Social life,Travel		5 in 5 days				Detractor	1	World Mega Marathon ranking 300+		Regular (including foods from all food groups)		Yes (positive test)	None		79	No	No	Yes	Yes	No	No	No		Stability		Intensity minutes		Ankle Injury,Plantar Fasciitis		Rest		Physiotherapist		No	No
EN	Europe		Other European Country	Germany	Male		56	270	81-100%	3:31-3:45	34	34	31-40	It is a way of life,Keeping fit and healthy,Social life,To reach certain milestones,Total numbers,Travel				Passive	8	Detractor	6	Other - Please specify	100 Marathon Club Germany	Regular (including foods from all food groups)		Yes (positive test)	None		60	No	No	No	Yes	No	No	No		Cushioned		None		Knee Injury,Muscle Pull,Tendonitus (Achilles tendinopathy)		Foam Rolling,Ice (Ice packs or cold compresses)		No I do not seek professional advise for running injuries		No	No
EN	Europe		Northern Ireland		Male		46	46	81-100%	3:01-3:15	25	25	0-10	Competition,Keeping fit and healthy,Sense of accomplishment,Social life,To reach certain milestones,Total numbers						Passive	7	None of these		Prefer not to say		No			100	Yes	No	Yes	Yes	No	No	No		Cushioned		None		Calf Injury,IT Band Syndrome,Knee Injury,Plantar Fasciitis		Accupuncture,Rest		Physiotherapist		Yes	No
EN	Europe		Republic of Ireland		Male		59	130	0-20%	2:46-3:00	21	21	11-20	It is a way of life				Promoter	9	Detractor	3	100 Marathons from your national club,MCI Ireland club milestones		Regular (including foods from all food groups)		Yes (positive test)	None		10	No	No	No	Yes	No	No	No		Cushioned		None		Blisters,Chafing,Stress Fracture		Ice (Ice packs or cold compresses),Rest,Stretching		No I do not seek professional advise for running injuries		No	No
EN	Europe		England		Male		57	184	21-40%	4:16-4:30	48	49	21-30	It is a way of life,Keeping fit and healthy,Social life				Passive	8			None of these		Regular (including foods from all food groups)		Probably yes (no positive test)	Unusual fatigue		50	No	No	No	Yes	Yes	No	No	Yes	Stability		None		Blisters,Chafing,IT Band Syndrome,Knee Injury,Plantar Fasciitis		Compression,Support strapping		Specialist or other- Please detail here:	Massage	Yes	No
EN	Europe		England		Female		57	216	81-100%	4:01-4:15	34	34	21-30	It is a way of life,Multi Marahon Series (e.g. 10 in 10 days),Social life		10 in 10 days		Detractor	2			None of these		Vegan		Yes (positive test)	None		70	No	No	No	Yes	Yes	No	No	Yes	Stability		Calories,Steps		IT Band Syndrome,Plantar Fasciitis		Rest		No I do not seek professional advise for running injuries		Yes	No
EN	Europe		Republic of Ireland		Male		54	53	81-100%	3:01-3:15	17	17	0-10	Keeping fit and healthy,Sense of accomplishment,Social life,To reach certain milestones,Total numbers,Others - Please specify	to test myself to inspire others					Detractor	4	Abbot Marathon Majors 6 stars,MCI Ireland club milestones		Regular (including foods from all food groups)		Yes (positive test)	Shortness of breath		40	No	Yes	Yes	Yes	No	No	No		Other - Please specify	neutral cushiined (asics nimbus) with orthotics	Calories,Max HR,Sleep,Steps,VO2MAX		Ankle Injury,Blisters,Chafing,Heat Exhaustion,Hip Injury,Shin Splints,Stress Fracture		Accupuncture,Compression,Elevation,Foam Rolling,Rest,RICE (Rest Ice Compression Elevation),Stretching		Physiotherapist,Specialist or other- Please detail here:		Yes	No
EN	Europe		England		Male		43	141	61-80%	3:16-3:30	37	37	21-30	Competition,It is a way of life,Keeping fit and healthy,Multi Marahon Series (e.g. 10 in 10 days),Sense of accomplishment,Social life,Others - Please specify	Run with my girlfriend	10 in 10 days,12 in 12 months,52 in 52 weeks,Back to Back,Other - Please specify	Quadzilla	Promoter	10	Passive	7	Global Marathon challenges,Mega Marathons,Other - Please specify	Running club distance challenge	Regular (including foods from all food groups)		Yes (positive test)	None		50	No	No	Yes	Yes	No	No	No		Cushioned,Stability,Light weight		Floors,Sleep,Steps		Ankle Injury,Blisters,Chafing,Plantar Fasciitis		Compression,Elevation,Foam Rolling,Ice (Ice packs or cold compresses),Pain Relief,Rest,RICE (Rest Ice Compression Elevation),Support strapping,Stretching,Other - Please Specify	Sports massage	Physiotherapist		No	No
EN	Europe		England		Female		37	106	81-100%	4:31-4:45	30	30	41-50	Keeping fit and healthy,Sense of accomplishment,Social life,To reach certain milestones				Promoter	9			100 Marathon club UK milestones		Regular (including foods from all food groups)		Yes (positive test)	Shortness of breath,Unusual fatigue		50	No	No	Yes	Yes	Yes	No	No	Yes	Cushioned		Calories,Sleep,Steps,VO2MAX		Blisters,IT Band Syndrome,Plantar Fasciitis		Elevation,RICE (Rest Ice Compression Elevation),Support strapping,Stretching		Physiotherapist		No	No
EN	Europe		Republic of Ireland		Male		40	147	81-100%	3:16-3:30	27	30	11-20	It is a way of life,Keeping fit and healthy,Sense of accomplishment,Social life,Others - Please specify	I pace a lot of marathons			Promoter	10	Detractor	0	MCI Ireland club milestones		Regular (including foods from all food groups)		Yes (positive test)	None		30	No	No	Yes	Yes	No	No	No		Other - Please specify	Not sure what category but I use ASICS nimbus due to wearing orthotics	Other - Please Specify	I use an Apple Watch with the 3rings to close, stand/move/exercise	Blisters,Calf Injury		Accupuncture,Other - Please Specify	Best relief ivevever got was/is when my Physo walks on my calf’s and hamstrings, theirs prob a name for it but he uses his feet to work out the knots in my muscles	Physiotherapist		No	No
EN	Europe		England		Female		42	129	81-100%	3:46-4:00	25	26	11-20	It is a way of life,Keeping fit and healthy,Running streaks,Sense of accomplishment,Social life,Travel				Passive	8	Detractor	5	None of these		Regular (including foods from all food groups)		Probably yes (no positive test)	None		30	No	No	Yes	Yes	No	No	No		Stability		None		Blisters,Chafing		Compression,Elevation,Foam Rolling,Rest,RICE (Rest Ice Compression Elevation),Stretching		Physiotherapist		No	No
EN	Europe		Germany		Female		55	31	81-100%	3:46-4:00	48	48	11-20	Competition,Continuous performance improvement,It is a way of life,Keeping fit and healthy,Sense of accomplishment						Detractor	4	100 Marathons from your national club,Abbot Marathon Majors 6 stars		Vegetarian (excludes fish, poultry, and meat)		No			60	No	Yes	No	Yes	No	No	No		Cushioned		Sleep		None		Foam Rolling,Ice (Ice packs or cold compresses),Rest,Stretching		No I do not seek professional advise for running injuries		No	No
EN	Europe		Republic of Ireland		Male		53	93	81-100%	4:16-4:30	42	43	11-20	It is a way of life,Keeping fit and healthy,Multi Marahon Series (e.g. 10 in 10 days),Sense of accomplishment,Social life,To reach certain milestones,Total numbers,Travel		Back to Back,Other - Please specify	Quadrathon (4 in4)			Detractor	6	MCI Ireland club milestones		Regular (including foods from all food groups)		Yes (positive test)	None		25	No	No	Yes	Yes	No	No	No		Cushioned,Stability		Steps		Chafing,Calf Injury,IT Band Syndrome,Other - Please specify	Groun strain	Rest		No I do not seek professional advise for running injuries		Yes	No
EN	Europe		Wales		Male		59	38	61-80%	2:46-3:00	35	35	0-10	Competition,Continuous performance improvement,Keeping fit and healthy,Sense of accomplishment,Others - Please specify	In memory of my wife, who died in 2021 but was always supporting me in my running especially my marathons					Detractor	5	Abbot Marathon Majors 6 stars,MCI Ireland club milestones		Regular (including foods from all food groups)		Yes (positive test)	None		50	Yes	No	Yes	Yes	No	No			Light weight		None		Chafing,Calf Injury,Muscle Pull,Plantar Fasciitis		Foam Rolling,Ice (Ice packs or cold compresses),Pain Relief,RICE (Rest Ice Compression Elevation),Support strapping,Stretching		No I do not seek professional advise for running injuries		No	No
EN	Europe		Germany		Male		67	601	41-60%	3:31-3:45	31	33	41-50	Competition,It is a way of life,Keeping fit and healthy,Multi Marahon Series (e.g. 10 in 10 days),Travel		5 in 5 days,52 in 52 weeks,Other - Please specify	7 in 7days 10 times	Passive	8	Detractor	5	7 continents in 7 days,100 Marathons from your national club,World Mega Marathon ranking 300+		Prefer not to say		No			80	No	No	No	Yes	No	No	No		Stability		None		Blisters,Shin Splints		Foam Rolling,Ice (Ice packs or cold compresses),Rest		No I do not seek professional advise for running injuries		No	No
EN	Europe		Republic of Ireland		Male		69	381	81-100%	3:01-3:15	43	46	21-30	It is a way of life,Keeping fit and healthy,Sense of accomplishment,To reach certain milestones				Promoter	9	Detractor	5	100 Marathons from your national club,MCI Ireland club milestones		Regular (including foods from all food groups)		Yes (positive test)	Forced to stop running for a period,Muscle aches,Shortness of breath,Unusual fatigue		75	No	Yes	Yes	Yes	No	No	No		Cushioned		Steps		Ankle Injury,Blisters,Chafing,IT Band Syndrome,Knee Injury,Muscle Pull,Plantar Fasciitis,Runners Knee,Tendonitus (Achilles tendinopathy)		Pain Relief,RICE (Rest Ice Compression Elevation),Support strapping,Stretching		Physiotherapist,Another Medical Professional (e.g. Physician, A&E)		Yes	No
EN	Europe		Republic of Ireland		Female		48	16	41-60%	3:46-4:00	38	38	0-10	It is a way of life,Keeping fit and healthy,Social life,Travel						Detractor	0	100 Marathons from your national club,MCI Ireland club milestones		Regular (including foods from all food groups)		Yes (positive test)	Unusual fatigue		80	Yes	Yes	Yes	Yes	No	No	No		Light weight		Heart Rate Variability,Max HR,Resting HR,Sleep,Steps		None		Other - Please Specify	Regular sports massage helps me enormously	Physiotherapist		No	No
EN	Europe		Republic of Ireland		Male		39	100	41-60%	2:46-3:00	33	34	0-10	It is a way of life				Detractor	0	Detractor	0	None of these		Regular (including foods from all food groups)		Yes (positive test)	None		100	Yes	Yes	Yes	Yes	Yes	Yes	Yes	Yes	Cushioned		Calories,Heart Rate Variability,VO2MAX		Blisters,Chafing,Hip Injury		Compression,Stretching,Other - Please Specify	Osteopath	Physiotherapist		Yes	No
EN	Europe		Republic of Ireland		Male		59	27	81-100%	3:46-4:00	46	50	0-10	Continuous performance improvement,Keeping fit and healthy,Sense of accomplishment						Detractor	3			Regular (including foods from all food groups)		Yes (positive test)	None		50	Yes	No	Yes	Yes	Yes	Yes	Yes	No	Cushioned		Intensity minutes,Max HR,Resting HR,VO2MAX		Blisters,Chafing,Calf Injury,Hip Injury,IT Band Syndrome,Runners Knee		Accupuncture,Foam Rolling,Rest		Physiotherapist		Yes	Yes
EN	Europe		Germany		Male		69	106	81-100%	4:16-4:30	49	49	0-10	It is a way of life,Sense of accomplishment,To reach certain milestones				Promoter	10	Detractor	0	100 Marathons from your national club		Regular (including foods from all food groups)		Yes (positive test)	None		25	No	No	No	No	No				Cushioned		None		None		Compression,Elevation,Ice (Ice packs or cold compresses),Rest,RICE (Rest Ice Compression Elevation)		Specialist or other- Please detail here:	Well, I didn’t have any so far, fortynately	No	No
EN	Europe		Republic of Ireland		Male		39	15	0-20%	2:46-3:00	31	31	0-10	Continuous performance improvement,It is a way of life,Keeping fit and healthy,Sense of accomplishment,Social life						Detractor	3	Abbot Marathon Majors 6 stars		Regular (including foods from all food groups)		Yes (positive test)	Elevated Heart rate,Unusual fatigue		70	Yes	Yes	Yes	Yes	Yes	Yes	No	Yes	Cushioned,Light weight,Other - Please specify	Carbon plated	Heart Rate Variability,Floors,Max HR,Pulse Ox,Resting HR,Sleep,Steps,Stress,VO2MAX		Ankle Injury,Blisters,Chafing,Calf Injury,Hip Injury,IT Band Syndrome,Knee Injury,Muscle Pull,Runners Knee,Shin Splints		Compression,Elevation,Foam Rolling,Ice (Ice packs or cold compresses),Pain Relief,Rest,RICE (Rest Ice Compression Elevation),Stretching		Physiotherapist		Yes	No
EN	Europe		Republic of Ireland		Male		42	6	81-100%	3:46-4:00	40	40	0-10	Continuous performance improvement,Keeping fit and healthy,Sense of accomplishment,To reach certain milestones						Detractor	4	None of these		Regular (including foods from all food groups)		Probably yes (no positive test)	None		55	Yes	No	No	Yes	Yes	No	No	No	Cushioned		Max HR,Resting HR,Sleep,Steps,VO2MAX		Chafing,Plantar Fasciitis		Foam Rolling,Rest,Stretching,Other - Please Specify	Massage gun	Physiotherapist		No	No
EN	Europe		Republic of Ireland		Female		37	63	21-40%	3:16-3:30	31	32	0-10	Continuous performance improvement,It is a way of life,To reach certain milestones						Detractor	6	Abbot Marathon Majors 6 stars		Regular (including foods from all food groups)		Yes (positive test)	Unusual fatigue		100	Yes	Yes	Yes	Yes	No	Yes	Yes		Cushioned		Heart Rate Variability,Intensity minutes,Max HR,Resting HR,VO2MAX		Blisters,Chafing,Calf Injury,Heat Exhaustion,Hip Injury,Plantar Fasciitis,Shin Splints,Tendonitus (Achilles tendinopathy)		Elevation,Foam Rolling,Pain Relief,Rest,RICE (Rest Ice Compression Elevation)		Physiotherapist		No	No
EN	Europe		Republic of Ireland		Male		49	28		3:31-3:45	38	38	0-10	Keeping fit and healthy						Detractor	0	None of these		Pesco-vegetarian (includes fish)		Yes (positive test)	Muscle aches		50	Yes	No	No	Yes	Yes	No	Yes	No	Light weight		Calories		Ankle Injury,Chafing,Calf Injury,IT Band Syndrome,Knee Injury,Muscle Pull,Plantar Fasciitis,Runners Knee,Shin Splints,Tendonitus (Achilles tendinopathy)		Accupuncture,Foam Rolling,Ice (Ice packs or cold compresses),Pain Relief,Support strapping		Physiotherapist		Yes	No
EN	Europe		Republic of Ireland		Male		44	66	61-80%	2:46-3:00	33	25	0-10	It is a way of life,Keeping fit and healthy,Sense of accomplishment,Social life,Total numbers						Detractor	0	None of these		Other (Please specify)	Gluten free	Yes (positive test)	Other (Please specify)	Memory recall issues	100	No	No	No	Yes	No	No			Motion Control (made to support heavy weight, flat feet or severe overpronation),Stability		Heart Rate Variability,Max HR,Resting HR,Steps,VO2MAX		Ankle Injury,Blisters,Chafing,Calf Injury,IT Band Syndrome,Knee Injury,Runners Knee,Shin Splints,Stress Fracture		Compression,Elevation,Foam Rolling,Rest		Physiotherapist,Specialist or other- Please detail here:		Yes	No
EN	Europe		Republic of Ireland		Male		40	10	81-100%	3:01-3:15	37	37	0-10	Keeping fit and healthy,Social life						Detractor	0	None of these		Regular (including foods from all food groups)		Probably yes (no positive test)	Muscle aches		80	Yes	Yes	Yes	Yes	No	No	No		Cushioned,Light weight		Sleep,VO2MAX		Chafing,Hip Injury,Knee Injury,Runners Knee,Shin Splints		Compression,Foam Rolling,Ice (Ice packs or cold compresses)		Physiotherapist		No	No
EN	Europe		Republic of Ireland		Male		39	44	0-20%	3:16-3:30	31	33	0-10	It is a way of life,Keeping fit and healthy,Sense of accomplishment						Detractor	5	None of these		Regular (including foods from all food groups)		Yes (positive test)	None		40	No	No	Yes	Yes	Yes	No	No	No	Cushioned		Heart Rate Variability		Blisters,Chafing,IT Band Syndrome,Knee Injury,Plantar Fasciitis,Runners Knee,Shin Splints		Foam Rolling,Rest,Stretching		Physiotherapist		No	No
EN	Europe		Republic of Ireland		Male		45	20	81-100%	2:46-3:00	28	30	0-10	Competition,Continuous performance improvement,It is a way of life,Keeping fit and healthy						Detractor	0	None of these		Regular (including foods from all food groups)		Yes (positive test)	Elevated Heart rate,Shortness of breath,Unusual fatigue		60	Yes	Yes	No	Yes	No	Yes	Yes		Light weight		Calories,Heart Rate Variability,Max HR,Resting HR,VO2MAX		Calf Injury		Foam Rolling,Ice (Ice packs or cold compresses),Rest		Physiotherapist		Yes	No
EN	Europe		Republic of Ireland		Female		43	5	0-20%	3:31-3:45	37	37	0-10	Keeping fit and healthy,Sense of accomplishment,To reach certain milestones						Detractor	1	Abbot Marathon Majors 6 stars		Regular (including foods from all food groups)		Yes (positive test)	None		35	Yes	No	No	Yes	Yes	No	No	No	Stability		Max HR,Resting HR,Sleep		IT Band Syndrome,Runners Knee		Foam Rolling,Stretching,Other - Please Specify	Needling, cupping and massage	Physiotherapist		No	No
EN	Europe		Republic of Ireland		Male		43	87	0-20%	2:46-3:00	32	32	0-10	Sense of accomplishment						Detractor	3	MCI Ireland club milestones		Regular (including foods from all food groups)		Yes (positive test)	None		60	No	No	No	Yes	Yes	No	No	Yes	Cushioned		Steps		Knee Injury,Tendonitus (Achilles tendinopathy)		Stretching,Surgery		Physiotherapist		No	No
EN	Europe		Republic of Ireland		Male		42	31	0-20%	3:16-3:30	26	29	0-10	Others - Please specify	What motivates me is the many people that cannot compete in such events.. Ie people with disability etc.. I have a small disability with my right leg but I try not let it hold me back and I'm privileged to be able to take on such events....					Detractor	2	None of these		Regular (including foods from all food groups)		Yes (positive test)	Elevated Heart rate,Forced to stop running for a period,Heart Palpitations,Muscle aches,Shortness of breath,Unusual fatigue		250	Yes	No	No	Yes	Yes	Yes	Yes	No	Stability		Heart Rate Variability,Sleep,VO2MAX		Ankle Injury,Blisters,Stress Fracture		Accupuncture,Foam Rolling,Ice (Ice packs or cold compresses),Rest		Physiotherapist		No	No
EN	Europe		Republic of Ireland		Female		41	11	0-20%	3:16-3:30	30	32	0-10	Sense of accomplishment						Detractor	5	Abbot Marathon Majors 6 stars		Regular (including foods from all food groups)		Yes (positive test)	Elevated Heart rate,Forced to stop running for a period,Heart Palpitations,Shortness of breath,Unusual fatigue		40	No	Yes	Yes	Yes	Yes	Yes	Yes	No	Light weight		Calories,Heart Rate Variability,Max HR,Resting HR,Sleep,VO2MAX		Chafing,Heat Exhaustion,Muscle Pull		Foam Rolling,Ice (Ice packs or cold compresses),Rest		Physiotherapist		Yes	No
EN	Europe		Republic of Ireland		Female		47	28	61-80%	3:46-4:00	42	41	0-10	Sense of accomplishment,Social life,Travel						Detractor	0	None of these		Regular (including foods from all food groups)		Yes (positive test)	Forced to stop running for a period,Heart Palpitations,Unusual fatigue,Other (Please specify)	Contracted covid at start in March 2020.. lost tasted and smell for 9months.	30	Yes	Yes	Yes	Yes	No	No			Stability		Floors,Steps		Blisters,Shin Splints		Rest,Stretching		Physiotherapist		Yes	No
EN	Europe		Republic of Ireland		Female		53	9	81-100%	3:16-3:30	47	48	0-10	Competition,Continuous performance improvement,It is a way of life,Keeping fit and healthy,Sense of accomplishment,Social life,To reach certain milestones,Travel						Detractor	2	Triple crown of Ultras (Comrades, Western States, UTMB)		Regular (including foods from all food groups)		Yes (positive test)	Muscle aches,Shortness of breath,Other (Please specify)	Long term cough. Respitory inflammation	70	Yes	No	Yes	Yes	Yes	No		No	Cushioned,Stability		Heart Rate Variability,Max HR,Resting HR,Sleep,Steps,VO2MAX		Stress Fracture		Foam Rolling,Ice (Ice packs or cold compresses),Pain Relief,Rest		Specialist or other- Please detail here:	Sports Massage	No	No
EN	Europe		Republic of Ireland		Prefer not to say		37	3	0-20%	4:46-5:00	37	38	0-10	It is a way of life,Keeping fit and healthy,Sense of accomplishment,To reach certain milestones,Others - Please specify	It's fun!					Detractor	2	None of these		Prefer not to say		Yes (positive test)	Unusual fatigue		55	Yes	No	No	Yes	Yes	No	No	No	Stability		Steps		Blisters,Chafing		Ice (Ice packs or cold compresses),Rest,RICE (Rest Ice Compression Elevation),Support strapping,Other - Please Specify	Surgical spirits wiped over feet	No I do not seek professional advise for running injuries		No	No
EN	Europe		Republic of Ireland		Male		49	129	21-40%	2:31-2:45	43	42	11-20	Continuous performance improvement,It is a way of life,Keeping fit and healthy,Sense of accomplishment,Social life,Travel				Passive	7	Passive	7	Abbot Marathon Majors 6 stars,Atlas 100-mile club milestones		Regular (including foods from all food groups)		Yes (positive test)	None		130	Yes	No	Yes	Yes	Yes	No	No	No	Cushioned,Light weight		Calories,Heart Rate Variability,Intensity minutes,VO2MAX		Ankle Injury,Blisters,Frostbite,Heat Exhaustion,Hypothermia,IT Band Syndrome		Foam Rolling,Rest,Stretching		Physiotherapist		No	No
EN	North America	United States			Male		55	255	81-100%	2:46-3:00	34	34	11-20	Awards,Competition,Keeping fit and healthy,Social life,To reach certain milestones				Detractor	5			50 US states,100 Marathons from your national club,Marathon Maniacs		Regular (including foods from all food groups)		Yes (positive test)	Elevated Heart rate,Shortness of breath,Unusual fatigue		80	No	No	Yes	Yes	Yes	No		No	Stability,Light weight		Heart Rate Variability,Max HR,Resting HR,Sleep,VO2MAX		Blisters,Chafing,Calf Injury,IT Band Syndrome,Knee Injury,Plantar Fasciitis,Shin Splints,Stress Fracture		Compression,Foam Rolling,Ice (Ice packs or cold compresses),Rest,Stretching,Other - Please Specify	Ice Baths	No I do not seek professional advise for running injuries		No	No
EN	Europe		Republic of Ireland		Male		42	100	61-80%	3:16-3:30	25	25	0-10	Continuous performance improvement,Keeping fit and healthy,Sense of accomplishment				Detractor	0	Detractor	0	None of these		Regular (including foods from all food groups)		Yes (positive test)	None		50	No	No	Yes	Yes	No	No	No		Light weight		None		Ankle Injury,Blisters,Chafing,Shin Splints		None		No I do not seek professional advise for running injuries		Yes	No
EN	Europe		Other European Country	Serbia and Poland	Male		69	449	81-100%	2:46-3:00	37	32	11-20	It is a way of life,Keeping fit and healthy,Sense of accomplishment,Travel				Passive	7	Detractor	2	100 Marathons from your national club,Marathon Maniacs,World Mega Marathon ranking 300+		Regular (including foods from all food groups)		No			50	No	No	No	No	Yes			Yes	Cushioned,Stability,Light weight		Heart Rate Variability,Intensity minutes,Respiration,Resting HR		Calf Injury,Muscle Pull,Tendonitus (Achilles tendinopathy)		Pain Relief,Rest		Physiotherapist		No	No
EN	Europe		Republic of Ireland		Female		40	46	0-20%	2:46-3:00	30		11-20	Competition,Continuous performance improvement,It is a way of life,Sense of accomplishment						Detractor	1	None of these		Regular (including foods from all food groups)		No			100	No	Yes	Yes	Yes	No	No	No		Light weight		Heart Rate Variability,Max HR,Other - Please Specify	Cadence	Ankle Injury,Blisters,Calf Injury,IT Band Syndrome,Knee Injury,Muscle Pull,Plantar Fasciitis,Tendonitus (Achilles tendinopathy)		Compression,Elevation,Rest,Support strapping,Stretching		Physiotherapist,Another Medical Professional (e.g. Physician, A&E)		No	No
EN	Europe		Republic of Ireland		Female		42	2	0-20%	3:01-3:15	40	41	0-10	Awards,Competition,Keeping fit and healthy,Sense of accomplishment						Detractor	4	None of these		Regular (including foods from all food groups)		Yes (positive test)	Elevated Heart rate,Muscle aches,Shortness of breath		90	Yes	Yes	Yes	Yes	Yes	Yes		No	Cushioned,Stability,Light weight		Heart Rate Variability,Intensity minutes,Resting HR		None		Compression,Foam Rolling,Rest,Support strapping,Stretching		Physiotherapist		Yes	No
EN	Europe		Republic of Ireland		Female		47	9	81-100%	3:01-3:15	44	44	0-10	Continuous performance improvement,Keeping fit and healthy,Sense of accomplishment,Social life,To reach certain milestones,Others - Please specify	Mental health					Detractor	1	None of these		Vegetarian (excludes fish, poultry, and meat)		Yes (positive test)	None		90	Yes	Yes	Yes	Yes	Yes	Yes	Yes	Yes	Cushioned		Heart Rate Variability,Resting HR,Sleep,VO2MAX		Blisters,Calf Injury,Heat Exhaustion,Tendonitus (Achilles tendinopathy)		Compression,Support strapping,Stretching		Physiotherapist		No	No
EN	Europe		Germany		Male		28	12	81-100%	3:16-3:30	24	24	0-10	Continuous performance improvement,It is a way of life						Detractor	4	None of these		Prefer not to say		No			60	No	Yes	No	Yes	No	No	Yes		Light weight		Intensity minutes,VO2MAX		None		Rest		No I do not seek professional advise for running injuries		No	No
EN	Europe		Republic of Ireland		Male		39	20	81-100%	2:46-3:00	26	28	0-10	Keeping fit and healthy,Sense of accomplishment						Detractor	2	None of these		Regular (including foods from all food groups)		Yes (positive test)	Shortness of breath		70	Yes	No	Yes	Yes	Yes	No	No	No	Light weight		Max HR,Resting HR		None		Rest,Other - Please Specify	strengthening	Physiotherapist		No	No
EN	Europe		England		Male		50	150	81-100%	4:16-4:30	43	43	0-10	Keeping fit and healthy				Passive	7	Detractor	0	100 Marathon club UK milestones,Global Marathon challenges,Mega Marathons		Vegan		Yes (positive test)	None		50	No	No	No	Yes	Yes	No	No	No	Cushioned		Resting HR,Steps		Blisters,Chafing,Heat Exhaustion,IT Band Syndrome,Shin Splints		Foam Rolling,RICE (Rest Ice Compression Elevation)		Physiotherapist		No	No
EN	Europe		Republic of Ireland		Male		50	50	61-80%	2:46-3:00	30	34	0-10	Competition,Continuous performance improvement						Detractor	5	Other - Please specify		Regular (including foods from all food groups)		No			100	No	No	Yes	Yes	Yes	Yes	Yes	No	Cushioned		Heart Rate Variability,Max HR,VO2MAX		Chafing,Calf Injury,Knee Injury,Muscle Pull,Runners Knee,Tendonitus (Achilles tendinopathy)		Ice (Ice packs or cold compresses),RICE (Rest Ice Compression Elevation)		Physiotherapist		No	No
EN	Europe		Republic of Ireland		Female		44	19		3:31-3:45	40	40	0-10	Keeping fit and healthy,Sense of accomplishment						Detractor	5	None of these		Regular (including foods from all food groups)		No			30	No	No	No	Yes	Yes	No	No	Yes	Light weight		Steps,VO2MAX		Ankle Injury,Blisters,Chafing,IT Band Syndrome,Knee Injury,Muscle Pull,Shin Splints		Foam Rolling,Pain Relief,Rest,Stretching		Physiotherapist,Specialist or other- Please detail here:	Physio when it’s too late	No	No
EN	Europe		Northern Ireland		Male		49	59	61-80%	2:46-3:00	42	43	0-10	Continuous performance improvement,It is a way of life,Keeping fit and healthy,Social life						Detractor	1	None of these		Regular (including foods from all food groups)		Yes (positive test)	Forced to stop running for a period,Muscle aches,Shortness of breath,Unusual fatigue		50	Yes	Yes	Yes	Yes	Yes	Yes	Yes	No	Light weight		Max HR,Resting HR,Sleep,Stress,VO2MAX		Chafing,Hip Injury,Knee Injury,Muscle Pull		Rest,Stretching,Other - Please Specify	Yoga	Physiotherapist		No	No
EN	Europe		Republic of Ireland		Male		43	52	0-20%	3:46-4:00	32	38	11-20	It is a way of life						Promoter	10	100 Marathons from your national club		Regular (including foods from all food groups)		Yes (positive test)	Elevated Heart rate,Forced to stop running for a period,Shortness of breath,Unusual fatigue		6	Yes	No	No	Yes	Yes	Yes	No	No	Other - Please specify	Arch support insoles	Heart Rate Variability		Blisters,Calf Injury,Hip Injury,Muscle Pull,Stress Fracture,Tendonitus (Achilles tendinopathy)		Stretching		Physiotherapist		No	No
EN	Europe		Northern Ireland		Male		40	60	0-20%	2:46-3:00	34	36	11-20	Continuous performance improvement						Detractor	1	None of these		Regular (including foods from all food groups)		Yes (positive test)	None		75	No	No	Yes	Yes	No	No			Light weight		Steps		None		Stretching		No I do not seek professional advise for running injuries		No	No
EN	Europe		Republic of Ireland		Male		41	10	61-80%	2:46-3:00	32	39	0-10	Competition,Continuous performance improvement,It is a way of life,Keeping fit and healthy						Detractor	2	None of these		Pesco-vegetarian (includes fish)		Yes (positive test)	Shortness of breath,Unusual fatigue		60	Yes	Yes	No	Yes	No	Yes	Yes		Cushioned		Heart Rate Variability,VO2MAX		Calf Injury		Accupuncture,Compression,Foam Rolling		Specialist or other- Please detail here:	Vinny Mulvey	Yes	No
EN	Europe		Republic of Ireland		Male		41	7	81-100%	3:31-3:45	38	38	0-10	Continuous performance improvement,Keeping fit and healthy,Sense of accomplishment,Social life						Detractor	1	None of these		Regular (including foods from all food groups)		Yes (positive test)	None		50	No	Yes	Yes	Yes	No	No			Cushioned		Max HR,Resting HR,Other - Please Specify	Distance and avg pace per km	Blisters,Hip Injury		Foam Rolling,Rest,Other - Please Specify	Massage	Physiotherapist		No	No
EN	Europe		England		Male		43	78	41-60%	2:31-2:45	17	27	0-10	Continuous performance improvement,It is a way of life,Multi Marahon Series (e.g. 10 in 10 days),Running streaks,Sense of accomplishment,Travel,Others - Please specify	T-shirt/medal design. Generally I don't want either, but occasionally it will be THE reason I pick an event	12 in 12 months,Back to Back,Other - Please specify	Aiming for an Accumulator in Dec2022 1,2,3 etc upto 31, however I plan to jump from 19 on day 19 to mara from day 20-26 inclusive, then 27, to 31, so will get a 12 in 12 days mara ins			Detractor	1	Global Marathon challenges		Regular (including foods from all food groups)		Yes (positive test)	Unusual fatigue		80	No	No	Yes	Yes	No	No	No		Cushioned,Motion Control (made to support heavy weight, flat feet or severe overpronation),Stability,Light weight		Other - Please Specify	Power metrics/Critical Power(FYP)	Ankle Injury,Blisters,Chafing,Calf Injury,Heat Exhaustion,Hip Injury,Knee Injury,Muscle Pull,Plantar Fasciitis,Shin Splints,Stress Fracture,Other - Please specify	Rhabdomyolosis ,Ostesis Pubis Pubic Sympasis	Compression,Elevation,Pain Relief,Other - Please Specify	Massage Heat-long soak hot bath, hear muscle rubs	No I do not seek professional advise for running injuries		Yes	No
EN	Europe		Republic of Ireland		Male		40	21	81-100%	2:46-3:00	26	26	0-10	Competition,Continuous performance improvement,It is a way of life,Keeping fit and healthy,Sense of accomplishment,Social life						Passive	8	Abbot Marathon Majors 6 stars		Regular (including foods from all food groups)		Yes (positive test)	None		100	Yes	Yes	Yes	Yes	Yes	Yes	Yes	No	Cushioned		Calories,Heart Rate Variability,Floors,Intensity minutes,Max HR,Respiration,Resting HR,Sleep,Steps,VO2MAX		Calf Injury,Shin Splints,Tendonitus (Achilles tendinopathy)		Compression,Pain Relief,Support strapping,Stretching		Physiotherapist		No	No
EN	Europe		Wales		Female		48	69	0-20%	>6:00	40	40	11-20	Total numbers,Others - Please specify	Mental health					Detractor	0	100 Marathon club UK milestones,Global Marathon challenges,Mega Marathons		Paleo		Yes (positive test)	Forced to stop running for a period,Shortness of breath,Unusual fatigue		50	No	No	No	No	Yes			No	Cushioned,Minimal e.g. Vibram or flip flops		None		Ankle Injury,Blisters,Calf Injury,Frostbite,Heat Exhaustion,Hypothermia,Knee Injury,Muscle Pull,Plantar Fasciitis,Runners Knee,Shin Splints,Stress Fracture		Pain Relief		Another Medical Professional (e.g. Physician, A&E)		Yes	No
EN	Europe		Republic of Ireland		Male		42	44	81-100%	2:46-3:00	27	27	0-10	Continuous performance improvement,Keeping fit and healthy,Others - Please specify	Mental health wellbeing					Detractor	5	MCI Ireland club milestones		Regular (including foods from all food groups)		Probably yes (no positive test)	None		50	No	Yes	No	Yes	Yes	No	Yes	No	Stability		Heart Rate Variability,Max HR,Resting HR,Steps,VO2MAX		Blisters,Chafing,Heat Exhaustion,Plantar Fasciitis		Foam Rolling,Rest,Stretching		Physiotherapist		No	No
EN	Europe		England		Male		67	1450	81-100%	3:16-3:30	33		>51	Awards,It is a way of life,Social life,Total numbers						Detractor	1	100 Marathons from your national club,100 Marathon club UK milestones,World Mega Marathon ranking 300+		Prefer not to say		No			42	No	No	No	No	No				Other - Please specify	Fitvil	None		Hip Injury,Other - Please specify	Arthritis in my feet	Pain Relief,Surgery		No I do not seek professional advise for running injuries		Yes	No
EN	North America	USA			Male		60	90	81-100%	3:16-3:30	51	51	11-20	Keeping fit and healthy,To reach certain milestones						Detractor	4	50 US states,Abbot Marathon Majors 6 stars,Marathon Maniacs,Mega Marathons		Regular (including foods from all food groups)		No			75	No	No	Yes	Yes	No	Yes	No		Cushioned		Max HR,Resting HR,Steps		Ankle Injury,Blisters,Chafing,Hypothermia,IT Band Syndrome,Knee Injury,Muscle Pull,Shin Splints,Tendonitus (Achilles tendinopathy)		Foam Rolling,Rest,Other - Please Specify	Ultrasound & laser	Specialist or other- Please detail here:	sports orthopedic doctor	Yes	Yes
EN	Europe		Republic of Ireland		Male		41	91	41-60%	3:31-3:45	27	34	11-20	Sense of accomplishment						Detractor	0	None of these		Regular (including foods from all food groups)		Yes (positive test)	Forced to stop running for a period,Shortness of breath,Unusual fatigue		80	No	No	Yes	Yes	No	No	No		Cushioned,Stability		Other - Please Specify	Time on feet	Ankle Injury,Blisters,Chafing,Heat Exhaustion,Knee Injury,Plantar Fasciitis,Runners Knee		Rest		Physiotherapist		Yes	No
EN	North America	Canada			Male		59	139	81-100%	4:16-4:30	50	50	11-20	It is a way of life,Keeping fit and healthy,Multi Marahon Series (e.g. 10 in 10 days),Sense of accomplishment,Social life,Travel		10 in 10 days,Back to Back		Passive	8	Detractor	5	7 continents,50 US states,100 Marathons from your national club,Abbot Marathon Majors 6 stars,Marathon Globetrotters,Marathon Maniacs		Regular (including foods from all food groups)		Yes (positive test)	None		55	No	No	No	Yes	No	No	No		Cushioned		Calories		Blisters,Chafing,Frostbite,Hip Injury,Plantar Fasciitis		Pain Relief		No I do not seek professional advise for running injuries		Yes	No
EN	Europe		Republic of Ireland		Male		54	120		3:16-3:30	42	43	11-20	Sense of accomplishment,Social life				Promoter	10	Promoter	10	MCI Ireland club milestones		Regular (including foods from all food groups)		Yes (positive test)	None		40	No	No	Yes	Yes	No	No			Cushioned		None		Calf Injury,Knee Injury		Ice (Ice packs or cold compresses)		Physiotherapist		No	No
EN	Europe		Republic of Ireland		Male		49	36	81-100%	3:16-3:30	32	34	0-10	It is a way of life,Keeping fit and healthy						Detractor	5	Abbot Marathon Majors 6 stars		Regular (including foods from all food groups)		Yes (positive test)	None		40	No	No	No	Yes	Yes	No	No	Yes	Stability		Heart Rate Variability,Max HR,Resting HR,Sleep,VO2MAX		Chafing,IT Band Syndrome,Knee Injury,Shin Splints		RICE (Rest Ice Compression Elevation),Other - Please Specify	Physio stretching program	Physiotherapist		No	No
EN	Europe		Republic of Ireland		Male		68	18	0-20%	3:01-3:15	27	27	0-10	Competition,Keeping fit and healthy,Sense of accomplishment						Detractor	5	Abbot Marathon Majors 6 stars		Regular (including foods from all food groups)		No			80	Yes	Yes	Yes	Yes	Yes	No	Yes	No	Stability		Max HR,Resting HR,Sleep,Steps,VO2MAX		IT Band Syndrome,Knee Injury,Runners Knee		Foam Rolling,Pain Relief,Rest,RICE (Rest Ice Compression Elevation)		Physiotherapist,Another Medical Professional (e.g. Physician, A&E)		Yes	No
EN	Europe		Republic of Ireland		Male		45	43	61-80%	3:01-3:15	42	42	11-20	Continuous performance improvement,It is a way of life,Keeping fit and healthy,Sense of accomplishment,To reach certain milestones						Detractor	2	None of these		Regular (including foods from all food groups)		Yes (positive test)	Elevated Heart rate,Muscle aches,Shortness of breath		60	No	No	No	Yes	Yes	Yes	No	Yes	Stability		Heart Rate Variability,Max HR,Resting HR,Sleep,Steps,VO2MAX		Chafing,Calf Injury,Hypothermia,Muscle Pull,Shin Splints,Stress Fracture		Elevation,Foam Rolling,Ice (Ice packs or cold compresses),Rest,Stretching		Physiotherapist		Yes	No
EN	Europe		Wales		Male		51	13	0-20%	2:46-3:00	39	39	0-10	Continuous performance improvement,It is a way of life,Keeping fit and healthy,Sense of accomplishment,Social life,To reach certain milestones,Travel						Promoter	10	None of these		Regular (including foods from all food groups)		Yes (positive test)	Elevated Heart rate,Forced to stop running for a period,Muscle aches,Shortness of breath,Unusual fatigue		70	No	Yes	Yes	Yes	Yes	No	No	No	Cushioned,Light weight		Heart Rate Variability,Intensity minutes,Sleep,VO2MAX		Heat Exhaustion,Muscle Pull,Plantar Fasciitis,Stress Fracture		Rest,Stretching		Physiotherapist		No	No
EN	Europe		Republic of Ireland		Female		43	31	61-80%	3:46-4:00	34	35	0-10	It is a way of life,Keeping fit and healthy						Detractor	2			Regular (including foods from all food groups)		Yes (positive test)	None		60	No	No	Yes	No	No				Stability		None		Chafing,IT Band Syndrome,Stress Fracture		Compression,Rest		Physiotherapist,Another Medical Professional (e.g. Physician, A&E),Specialist or other- Please detail here:		No	No
EN	Europe		Republic of Ireland		Male		49	6	81-100%	4:01-4:15	43	43	0-10	Keeping fit and healthy,Sense of accomplishment,Social life						Detractor	2	None of these		Prefer not to say		No			50	Yes	Yes	Yes	Yes	Yes	No	No	No	Stability		Heart Rate Variability,Max HR,Pulse Ox,VO2MAX		Blisters,Chafing,Heat Exhaustion,Hip Injury,Knee Injury		Foam Rolling,Rest		Physiotherapist		Yes	No
EN	Europe		Republic of Ireland		Male		40	12	81-100%	3:31-3:45	34	35	0-10	To reach certain milestones						Detractor	3	None of these		Regular (including foods from all food groups)		Yes (positive test)	None		35	Yes	Yes	Yes	Yes	No	No	No		Cushioned,Stability		None		Blisters,Chafing,Calf Injury,Runners Knee,Shin Splints,Stress Fracture		Rest,Stretching		Another Medical Professional (e.g. Physician, A&E)		No	No
EN	Europe		Republic of Ireland		Male		54	266	21-40%	3:31-3:45	21	21	21-30	It is a way of life,Keeping fit and healthy,Multi Marahon Series (e.g. 10 in 10 days),Sense of accomplishment,To reach certain milestones		10 in 10 days,Back to Back		Detractor	5	Passive	7	MCI Ireland club milestones		Regular (including foods from all food groups)		No			60	No	No	Yes	No	Yes			No	Stability		None		None		None		No I do not seek professional advise for running injuries		No	No
EN	Europe		Republic of Ireland		Male		48	25	61-80%	3:31-3:45	35	35	0-10	Keeping fit and healthy,Sense of accomplishment,To reach certain milestones						Detractor	5	None of these		Regular (including foods from all food groups)		Yes (positive test)	None		80	No	No	No	Yes	Yes	No	No	Yes	Cushioned		Calories,Resting HR,VO2MAX		Blisters,Chafing,Calf Injury,Heat Exhaustion,Hip Injury,IT Band Syndrome,Knee Injury,Muscle Pull,Plantar Fasciitis,Runners Knee		Accupuncture,Foam Rolling		Physiotherapist		No	Yes
EN	Europe		Republic of Ireland		Female		50	35	81-100%	4:46-5:00	44	44	0-10	It is a way of life,Keeping fit and healthy,Sense of accomplishment,Social life,Travel						Detractor	0	Abbot Marathon Majors 6 stars,MCI Ireland club milestones		Regular (including foods from all food groups)		Probably yes (no positive test)	Elevated Heart rate,Forced to stop running for a period,Muscle aches,Shortness of breath,Unusual fatigue		50	Yes	No	No	Yes	No	Yes	No		Cushioned,Stability		Max HR,Resting HR,Sleep,Steps,VO2MAX		Ankle Injury,Blisters,Chafing,Calf Injury,Shin Splints		Ice (Ice packs or cold compresses),Pain Relief,Rest,Stretching		Physiotherapist,Another Medical Professional (e.g. Physician, A&E)		Yes	No
EN	Europe		Republic of Ireland		Male		45	21	81-100%	4:01-4:15	38	44	0-10	Competition,Continuous performance improvement,It is a way of life,Keeping fit and healthy,Multi Marahon Series (e.g. 10 in 10 days),Sense of accomplishment,To reach certain milestones,Travel		Back to Back				Detractor	1	None of these		Regular (including foods from all food groups)		No			40	No	Yes	Yes	Yes	No	No			Cushioned		Steps		Calf Injury,Hip Injury,IT Band Syndrome,Plantar Fasciitis,Tendonitus (Achilles tendinopathy)		Accupuncture,Foam Rolling,Ice (Ice packs or cold compresses),Pain Relief,Rest,Stretching		Physiotherapist		No	No
EN	Europe		Republic of Ireland		Male		35	6	0-20%	3:01-3:15	30	0	0-10	Continuous performance improvement						Passive	8	None of these		Regular (including foods from all food groups)		Yes (positive test)	Elevated Heart rate		65	Yes	Yes	No	Yes	No	Yes	Yes		Light weight		Max HR		Heat Exhaustion		Stretching		Physiotherapist		No	No
EN	North America	Usa			Male		67	129	21-40%	3:16-3:30	38	40	11-20	It is a way of life,Keeping fit and healthy,Sense of accomplishment,Travel				Passive	7			50 US states,100 Marathons from your national club,Marathon Maniacs		Regular (including foods from all food groups)		Yes (positive test)	Shortness of breath		60	No	No	No	Yes	Yes	No		No	Cushioned,Stability		Calories,Heart Rate Variability,Max HR		Ankle Injury,Hip Injury,Muscle Pull,Plantar Fasciitis		Pain Relief,Rest		No I do not seek professional advise for running injuries		Yes	Yes
EN	Europe		Republic of Ireland		Female		44	9	0-20%	4:16-4:30	36	36	0-10	Keeping fit and healthy,Social life,Travel						Detractor	3	None of these		Regular (including foods from all food groups)		No			40	No	No	Yes	Yes	No	No	No		Other - Please specify	mizuno	Calories,Sleep,Steps,Stress,VO2MAX		Chafing,Knee Injury,Shin Splints		Pain Relief,Rest		No I do not seek professional advise for running injuries		No	No
EN	North America	USA			Female		71	21	0-20%	4:16-4:30	60	60	0-10	Awards,Competition,Continuous performance improvement,Keeping fit and healthy,Sense of accomplishment						Promoter	10	Marathon Maniacs		Regular (including foods from all food groups)		No			45	Yes	No	Yes	Yes	Yes	No	No	No	Cushioned		Intensity minutes		Hip Injury,Stress Fracture		None		No I do not seek professional advise for running injuries		Yes	No
EN	Europe		England		Female		48	103	81-100%	4:16-4:30	34	34	11-20	Keeping fit and healthy,Social life,Travel				Detractor	5	Detractor	2	100 Marathon club UK milestones		Regular (including foods from all food groups)		Yes (positive test)	None		21	No	No	Yes	Yes	No	No	No		Cushioned		Heart Rate Variability,Intensity minutes,Max HR,Resting HR,Sleep,Steps,Stress,VO2MAX		Blisters,Chafing,Muscle Pull		Rest		No I do not seek professional advise for running injuries		No	No
EN	Europe		England		Male		44	157	81-100%	2:46-3:00	28	28	31-40	Awards,Competition,Continuous performance improvement,It is a way of life,Keeping fit and healthy,Sense of accomplishment,Social life,To reach certain milestones,Total numbers,Travel				Promoter	10	Detractor	5	None of these		Vegan		Yes (positive test)	None		90	No	No	No	Yes	No	No	No		Cushioned		None		Blisters,Chafing,Muscle Pull,Morton's Neuroma,Runners Knee		Foam Rolling,Ice (Ice packs or cold compresses),Stretching,Surgery		Physiotherapist		Yes	No
EN	Europe		Northern Ireland		Male		59	25	0-20%	3:31-3:45	46	47	0-10	It is a way of life,Keeping fit and healthy,Sense of accomplishment,Social life,Others - Please specify	Mental well being					Detractor	5	Atlas 100-mile club milestones		Regular (including foods from all food groups)		No			46	No	No	Yes	Yes	No	No	No		Cushioned		Resting HR,Sleep,Steps,VO2MAX		Blisters,Tendonitus (Achilles tendinopathy)		Other - Please Specify	Physio	Physiotherapist		Yes	No
EN	Europe		Republic of Ireland		Male		55	150	61-80%	3:16-3:30	45	45	11-20	It is a way of life,Keeping fit and healthy,Sense of accomplishment,Social life				Detractor	5	Detractor	0	None of these		Regular (including foods from all food groups)		Yes (positive test)	Forced to stop running for a period,Shortness of breath,Unusual fatigue		55	No	No	No	Yes	No	No	No		Cushioned		Intensity minutes,Sleep,Steps		Ankle Injury,Blisters,Calf Injury,Hip Injury,IT Band Syndrome,Knee Injury,Muscle Pull,Plantar Fasciitis,Runners Knee,Shin Splints,Tendonitus (Achilles tendinopathy)		Elevation,Foam Rolling,Ice (Ice packs or cold compresses),Pain Relief,Rest,RICE (Rest Ice Compression Elevation),Stretching		Physiotherapist		No	No
EN	Europe		Germany		Male		43	33	41-60%	3:16-3:30	30	30	0-10	It is a way of life,Keeping fit and healthy,Sense of accomplishment						Detractor	5	None of these		Regular (including foods from all food groups)		Yes (positive test)	None		50	No	No	Yes	Yes	Yes	Yes	No	No	Cushioned,Stability		Heart Rate Variability,Max HR,Resting HR,Sleep,Stress,VO2MAX		Blisters,Shin Splints		Pain Relief,Rest		No I do not seek professional advise for running injuries		No	No
EN	North America	USA			Male		67	960	81-100%	3:16-3:30	38	41	>51	It is a way of life,Sense of accomplishment,Social life,To reach certain milestones,Total numbers,Travel,Others - Please specify	Friends			Promoter	10	Promoter	10	7 continents,50 US states,100 Marathons from your national club,Abbot Marathon Majors 6 stars,Marathon Globetrotters,Marathon Maniacs,Mega Marathons,World Mega Marathon ranking 300+		Regular (including foods from all food groups)		Yes (positive test)	None		84	No	No	No	Yes	No	No			Cushioned,Other - Please specify	Trail	Heart Rate Variability,Max HR,Resting HR,Sleep,Steps		Blisters,Chafing,Knee Injury,Morton's Neuroma,Runners Knee		Elevation,Ice (Ice packs or cold compresses),Pain Relief,Rest,RICE (Rest Ice Compression Elevation),Surgery		Another Medical Professional (e.g. Physician, A&E)		Yes	Yes
EN	North America	Mexico			Male		37	92	0-20%	3:01-3:15	30	31	11-20	Competition,Continuous performance improvement,It is a way of life,To reach certain milestones						Detractor	5	None of these		Regular (including foods from all food groups)		No			100	No	Yes	No	Yes	No	No	No		Stability,Light weight,Minimal e.g. Vibram or flip flops		None		None		Ice (Ice packs or cold compresses),Surgery		Physiotherapist		No	Yes
EN
EN	Europe		Republic of Ireland		Male		36	240	61-80%	2:16-2:30	25	25	0-10	Competition,It is a way of life,Keeping fit and healthy				Promoter	9	Passive	7	None of these		Regular (including foods from all food groups)		Yes (positive test)	Unusual fatigue		80	Yes	Yes	Yes	Yes	Yes	Yes	No	Yes	Cushioned		Resting HR,Sleep		Calf Injury,Stress Fracture,Tendonitus (Achilles tendinopathy)		Compression,Pain Relief,Support strapping		Physiotherapist,Another Medical Professional (e.g. Physician, A&E)		Yes	No
EN	Europe		Republic of Ireland		Male		29	7	81-100%	2:46-3:00	28	28	0-10	Continuous performance improvement,It is a way of life,Keeping fit and healthy,Sense of accomplishment,Social life,To reach certain milestones						Detractor	4	None of these		Regular (including foods from all food groups)		Yes (positive test)	Elevated Heart rate,Forced to stop running for a period,Heart Palpitations,Muscle aches,Shortness of breath,Unusual fatigue		75	No	Yes	Yes	Yes	Yes	Yes	Yes	No	Cushioned,Stability,Light weight		Calories,Heart Rate Variability,Floors,Intensity minutes,Max HR,Resting HR,Sleep,Steps,Stress,VO2MAX		Ankle Injury,Blisters,Chafing,Calf Injury,Hip Injury,Knee Injury,Plantar Fasciitis,Runners Knee,Tendonitus (Achilles tendinopathy)		Compression,Elevation,Foam Rolling,Pain Relief,Rest,Support strapping,Stretching		Physiotherapist		Yes	No
EN	Europe		England		Female		50	140	0-20%	4:01-4:15	39	39	11-20	Competition,Sense of accomplishment,Social life				Detractor	6			100 Marathon club UK milestones,Other - Please specify	100 ultra club UK	Regular (including foods from all food groups)		No			80	No	No	Yes	Yes	No	No	No		Cushioned,Other - Please specify	Depends on terrain	Heart Rate Variability,Intensity minutes,Resting HR,Sleep,Steps		Blisters,Chafing,Calf Injury,Heat Exhaustion,Hip Injury,IT Band Syndrome,Muscle Pull,Shin Splints,Other - Please specify	Glute injury, slipped discs	Pain Relief,Rest,Stretching		Physiotherapist		Yes	Yes
EN	Europe		England		Female		35	247	61-80%	4:01-4:15	26	26	31-40	It is a way of life,Social life,To reach certain milestones,Total numbers				Promoter	10	Promoter	10	100 Marathon club UK milestones		Vegetarian (excludes fish, poultry, and meat)		No			43	No	No	No	Yes	Yes	No	No	No	Cushioned		Calories,Resting HR		Blisters,Chafing,Runners Knee		Rest		No I do not seek professional advise for running injuries		No	No
EN	Europe		Wales		Male		47	75	61-80%	3:31-3:45	42	42	11-20	Continuous performance improvement,It is a way of life,Keeping fit and healthy,Sense of accomplishment,Social life,To reach certain milestones,Total numbers,Travel						Detractor	0	None of these		Regular (including foods from all food groups)		No			60	No	No	Yes	Yes	Yes	No		No	Cushioned,Stability,Light weight		Calories,Max HR,VO2MAX		Frostbite		Compression,Rest		Physiotherapist		No	No
EN	Europe		England		Male		42	22	61-80%	3:46-4:00	40	35	0-10	Keeping fit and healthy,Travel						Promoter	9	None of these		Regular (including foods from all food groups)		Probably yes (no positive test)	Muscle aches		100	No	Yes	No	Yes	No	Yes			Cushioned		Calories,Heart Rate Variability,Resting HR,Sleep,Steps,VO2MAX		Blisters,Muscle Pull		Compression,Elevation,Pain Relief,Rest,RICE (Rest Ice Compression Elevation)		No I do not seek professional advise for running injuries		Yes	No
EN	Europe		England		Male		59	12	81-100%	4:01-4:15	55	55	0-10	Awards,Continuous performance improvement,Keeping fit and healthy,Sense of accomplishment,To reach certain milestones,Travel						Passive	8	None of these		Other (Please specify)	No special diet	Yes (positive test)	Muscle aches,Unusual fatigue		40	No	No	No	Yes	No	No			Cushioned		Floors,Intensity minutes,Max HR,Resting HR,Steps,VO2MAX		Blisters,Hip Injury,IT Band Syndrome,Knee Injury		Pain Relief,Rest,Other - Please Specify	Massage	Physiotherapist		No	No
EN
EN	Europe		England		Female		46	20	61-80%	4:31-4:45	44	44	0-10	Keeping fit and healthy,Social life,Travel						Detractor	3	None of these		Pesco-vegetarian (includes fish)		Yes (positive test)	None		40	No	Yes	No	Yes	Yes	No		Yes	Cushioned,Light weight		Calories,Max HR		None		Compression,Elevation,Foam Rolling,Stretching		No I do not seek professional advise for running injuries		No	No
EN	Europe		Other European Country	Estonia	Male		50	124	81-100%	3:16-3:30	34	34	0-10	Continuous performance improvement,It is a way of life,Keeping fit and healthy,Social life,Travel				Passive	7	Detractor	5	100 Marathons from your national club,Abbot Marathon Majors 6 stars		Regular (including foods from all food groups)		No			45	No	No	No	Yes	No	Yes	No		Cushioned		Resting HR,Sleep		Blisters,Chafing,Hip Injury,Plantar Fasciitis,Tendonitus (Achilles tendinopathy)		Rest,Other - Please Specify	Physiotherapy, active walking	Physiotherapist		No	No
EN	Europe		Other European Country	Estonia	Male		44	36	81-100%	3:01-3:15	26	26	0-10	Competition,It is a way of life,Keeping fit and healthy,Social life						Detractor	1	None of these		Regular (including foods from all food groups)		No			50	Yes	No	Yes	Yes	No	Yes	Yes		Cushioned		None		Plantar Fasciitis		Rest		No I do not seek professional advise for running injuries		No	No
EN	Europe		England		Female		49	119	61-80%	4:46-5:00	37	37	11-20	It is a way of life,Keeping fit and healthy,Total numbers				Passive	8	Detractor	0	Mega Marathons		Pesco-vegetarian (includes fish)		Yes (positive test)	Forced to stop running for a period,Shortness of breath		15	No	No	No	Yes	Yes	No	No	No	Cushioned		Steps		Blisters,Hip Injury		Accupuncture,Ice (Ice packs or cold compresses),Rest,Stretching,Other - Please Specify	Sports massage	Physiotherapist,Specialist or other- Please detail here:	Sports massage therapist	No	No
EN	Europe		Other European Country	Estonia	Male		43	7	0-20%	3:46-4:00	38	38	0-10	Continuous performance improvement,It is a way of life,Keeping fit and healthy						Detractor	3	None of these		Regular (including foods from all food groups)		Probably yes (no positive test)	None		40	Yes	No	No	Yes	Yes	Yes	Yes	No	Cushioned		Heart Rate Variability		Blisters,Other - Please specify	Cramps	Compression,Rest,Other - Please Specify	Massage	No I do not seek professional advise for running injuries		No	No
EN	North America	Canada			Female		54	12	0-20%	4:31-4:45	45	45	0-10	Keeping fit and healthy,Sense of accomplishment,Travel						Detractor	2	Abbot Marathon Majors 6 stars		Regular (including foods from all food groups)		Yes (positive test)	None		20	Yes	No	No	Yes	Yes	Yes	No	No	Cushioned		Heart Rate Variability,Intensity minutes,Max HR,Resting HR,Sleep,VO2MAX		Ankle Injury,Chafing,Plantar Fasciitis,Shin Splints		Compression,Elevation,Ice (Ice packs or cold compresses),Rest,Stretching,Other - Please Specify	Physio therapy	Physiotherapist		Yes	No
EN	Europe		Other European Country	Estonia	Female		35	8	61-80%	4:01-4:15	29	32	0-10	Continuous performance improvement,It is a way of life,Keeping fit and healthy,Social life,To reach certain milestones,Travel						Detractor	6	None of these		Regular (including foods from all food groups)		No			39	Yes	Yes	Yes	Yes	Yes	Yes	Yes	No	Cushioned		Max HR,Resting HR,Sleep,Steps		Ankle Injury		Compression,Rest,Other - Please Specify	Cold shower	Physiotherapist		No	No
EN	Europe		Other European Country	Estonia	Female		55	213	81-100%	3:46-4:00	47	48	11-20	Awards,Competition,It is a way of life,Keeping fit and healthy,Social life				Promoter	10	Promoter	9	100 Marathons from your national club		Regular (including foods from all food groups)		No			30	No	No	No	Yes	No	No	No		Stability		Intensity minutes,Steps,VO2MAX		Plantar Fasciitis		Rest,Stretching		No I do not seek professional advise for running injuries		No	No
EN	Europe		Other European Country	Estonia	Male		50	42	41-60%	2:16-2:30	44	44	0-10	It is a way of life,Keeping fit and healthy,Travel						Passive	7	None of these		Pesco-vegetarian (includes fish)		Probably yes (no positive test)	Muscle aches,Shortness of breath,Unusual fatigue		50	No	No	No	Yes	Yes	No	No	Yes	Motion Control (made to support heavy weight, flat feet or severe overpronation)		Calories,Heart Rate Variability,Max HR		Ankle Injury,Blisters,Chafing,Calf Injury,Frostbite,Heat Exhaustion,Hypothermia,Knee Injury,Muscle Pull,Tendonitus (Achilles tendinopathy)		Compression,Foam Rolling,Rest,Stretching		Physiotherapist		No	No
EN	Europe		Germany		Male		62	681	81-100%	2:31-2:45	14	14	21-30	It is a way of life,Keeping fit and healthy,Social life,Travel				Detractor	5	Detractor	6	100 Marathons from your national club,World Mega Marathon ranking 300+		Regular (including foods from all food groups)		No			60	No	No	No	No	No				Stability		None		None		Rest		Physiotherapist		No	No
EN	Europe		Other European Country	Estonia	Male		55	168	81-100%	3:16-3:30	37	39	11-20	Keeping fit and healthy,Sense of accomplishment,Social life,Travel				Passive	7	Detractor	3	100 Marathons from your national club		Regular (including foods from all food groups)		No			60	No	No	No	Yes	No	No	No		Cushioned		Resting HR,VO2MAX		Blisters,Muscle Pull		Rest,Stretching		No I do not seek professional advise for running injuries		No	No
EN	Europe		England		Male		48	219	81-100%	2:46-3:00	41	42	31-40	It is a way of life,Keeping fit and healthy,Sense of accomplishment,Social life				Promoter	10	Detractor	2	Other - Please specify	I’m part of 100 Marathon Club UK but that’s all.	Regular (including foods from all food groups)		Yes (positive test)	Other (Please specify)	Once negative test came back, my symptoms cleared quickly.	100	No	Yes	No	Yes	Yes	No	No	No	Other - Please specify	Not sure. Brooks or ASICS. Trainer choice is based on what’s available in the sales.	Other - Please Specify	I don’t monitor any of these stats. I only use my watch to record mileage/pace/time.	Blisters,Chafing,Hypothermia,Other - Please specify	I’ve had a fair few niggles. When is a niggle, an injury? If you have to take a few days off, does that constitute an injury?	Rest,RICE (Rest Ice Compression Elevation),Stretching		Specialist or other- Please detail here:	I have visited a physio in the past but finances mean I haven’t for a long time.	Yes	Yes
EN	Europe		England		Male		48	144	0-20%	3:01-3:15	41	43	31-40	It is a way of life,Keeping fit and healthy,Sense of accomplishment,Social life,To reach certain milestones				Promoter	10	Detractor	0	100 Marathon club UK milestones		Regular (including foods from all food groups)		Yes (positive test)	None		90	No	Yes	No	Yes	Yes	No	No	No	Cushioned		Steps		Ankle Injury,Blisters,Chafing,Calf Injury,Hypothermia,Plantar Fasciitis,Tendonitus (Achilles tendinopathy)		Compression,Pain Relief,Rest,RICE (Rest Ice Compression Elevation),Support strapping		No I do not seek professional advise for running injuries		Yes	Yes
EN	Europe		England		Male		54	241	81-100%	4:16-4:30	34	34	21-30	Awards,Competition,Continuous performance improvement,It is a way of life,Keeping fit and healthy,Multi Marahon Series (e.g. 10 in 10 days),Running streaks,Sense of accomplishment,Social life,To reach certain milestones,Total numbers,Travel		10 in 10 days,52 in 52 weeks,Back to Back		Promoter	10	Detractor	5	100 Marathons from your national club,100 Marathon club UK milestones,Marathon Maniacs,Other - Please specify	10in10 and Quadzilla	Other (Please specify)	None	Yes (positive test)	Muscle aches,Shortness of breath,Unusual fatigue		25	No	No	Yes	No	Yes			Yes	Cushioned		None		Ankle Injury,Blisters,Chafing,Calf Injury,Frostbite,Heat Exhaustion,Hip Injury,Hypothermia,IT Band Syndrome,Knee Injury,Muscle Pull,Plantar Fasciitis,Shin Splints,Tendonitus (Achilles tendinopathy)		Compression,Ice (Ice packs or cold compresses),Pain Relief,RICE (Rest Ice Compression Elevation),Support strapping		No I do not seek professional advise for running injuries		Yes	No
EN	Europe		Germany		Male		68	104	21-40%	3:01-3:15	35	34	0-10	It is a way of life,Keeping fit and healthy				Detractor	2			None of these		Regular (including foods from all food groups)		Yes (positive test)	None		100	No	No	Yes	Yes	No	No	Yes		Cushioned,Stability		Heart Rate Variability,Intensity minutes,VO2MAX		Morton's Neuroma		Rest		Another Medical Professional (e.g. Physician, A&E)		No	No
EN	Europe		Other European Country	Estonia	Male		32	17	81-100%	3:16-3:30	25	26	0-10	It is a way of life,Keeping fit and healthy,Travel						Passive	7	7 continents,100 Marathons from your national club,Abbot Marathon Majors 6 stars		Regular (including foods from all food groups)		Yes (positive test)	Forced to stop running for a period,Muscle aches,Unusual fatigue		50	No	Yes	No	Yes	No	Yes	No		Cushioned		Calories,Heart Rate Variability,Max HR,Steps,VO2MAX		Chafing,Heat Exhaustion,IT Band Syndrome,Knee Injury,Runners Knee,Shin Splints		Compression,Foam Rolling,Stretching		Physiotherapist		No	Yes
EN	Europe		Other European Country	Estonia	Male		43	10	81-100%	3:46-4:00	30	31	0-10	Continuous performance improvement,Keeping fit and healthy,Sense of accomplishment,Social life,To reach certain milestones,Travel						Detractor	0	None of these		Regular (including foods from all food groups)		Yes (positive test)	Elevated Heart rate,Unusual fatigue		40	Yes	No	No	Yes	No	Yes	Yes		Cushioned,Stability		Heart Rate Variability,Max HR,Resting HR,Stress,VO2MAX		Blisters		Rest		Another Medical Professional (e.g. Physician, A&E)		Yes	No
EN	Europe		Other European Country	estonia	Male		41	44	81-100%	3:31-3:45	36	36	11-20	It is a way of life,Keeping fit and healthy,Social life,Total numbers,Travel						Promoter	10	100 Marathons from your national club		Prefer not to say		No			10	No	Yes	No	Yes	No	No	No		Cushioned,Light weight		None		None		None		No I do not seek professional advise for running injuries		No	No
EN	North America	United States			Male		75	328	61-80%	3:16-3:30	27	27	11-20	Awards,It is a way of life,Keeping fit and healthy,Sense of accomplishment,Social life,Travel				Promoter	10	Detractor	6	7 continents,50 US states,100 Marathons from your national club,Marathon Globetrotters,Marathon Maniacs		Regular (including foods from all food groups)		No			40	No	No	No	Yes	No	No	No		Cushioned,Light weight		Other - Please Specify	Miles	Blisters,Chafing,Hypothermia,Knee Injury,Morton's Neuroma,Runners Knee,Stress Fracture,Tendonitus (Achilles tendinopathy)		Foam Rolling,Rest,Stretching,Surgery		Specialist or other- Please detail here:	I had my kneecap wired back together after it broke laterally.	No	No
EN	Europe		Germany		Male		55	51	81-100%	2:46-3:00	21	24	0-10	Awards,Competition,It is a way of life,Keeping fit and healthy,Sense of accomplishment,To reach certain milestones,Total numbers,Travel,Others - Please specify	collecting Marathon countris					Detractor	3	Marathon Globetrotters,Other - Please specify	Marathon Country Club	Regular (including foods from all food groups)		Yes (positive test)	None		65	No	Yes	Yes	No	No				Stability		None		Ankle Injury,Blisters,Stress Fracture		RICE (Rest Ice Compression Elevation),Stretching		Another Medical Professional (e.g. Physician, A&E)		No	No
EN	Europe		Republic of Ireland		Female		54	95	0-20%	4:01-4:15	43	46	11-20	It is a way of life,Sense of accomplishment,Social life,To reach certain milestones						Detractor	6	MCI Ireland club milestones		Regular (including foods from all food groups)		Yes (positive test)	Unusual fatigue		20	No	No	Yes	Yes	No	No			Stability		None		Stress Fracture		Foam Rolling,Rest,Stretching		Another Medical Professional (e.g. Physician, A&E)		Yes	No
EN	Europe		England		Male		37	90	61-80%	3:16-3:30	35	35	31-40	Awards,Continuous performance improvement,It is a way of life,Keeping fit and healthy,Multi Marahon Series (e.g. 10 in 10 days),Running streaks,Social life		10 in 10 days,52 in 52 weeks				Promoter	10	100 Marathons from your national club		Prefer not to say		No
EN	Europe		Other European Country	Germany	Male		49	433	21-40%	3:01-3:15	35	35	>51	Awards,Competition,It is a way of life,Keeping fit and healthy,Social life				Promoter	9	Detractor	5
EN	North America	USA			Male		63	192	81-100%	3:16-3:30	41	41	0-10	Competition,Continuous performance improvement,It is a way of life,Keeping fit and healthy,Sense of accomplishment,Social life,To reach certain milestones,Total numbers,Travel				Detractor	6	Detractor	6	7 continents,50 US states,100 Marathons from your national club,Abbot Marathon Majors 6 stars,Marathon Globetrotters,Marathon Maniacs		Vegetarian (excludes fish, poultry, and meat)		Yes (positive test)	None		45	No	No	Yes	Yes	No	No	No		Cushioned,Light weight		Calories,Heart Rate Variability,Max HR		Blisters,Chafing,Knee Injury,Plantar Fasciitis,Shin Splints		Accupuncture,Pain Relief,RICE (Rest Ice Compression Elevation),Surgery		Physiotherapist,Another Medical Professional (e.g. Physician, A&E)		Yes	Yes
EN	Europe		Northern Ireland		Male		31	34	81-100%	3:01-3:15	27	29	0-10	It is a way of life,Keeping fit and healthy,Sense of accomplishment,Travel						Detractor	1	None of these		Regular (including foods from all food groups)		No			130	No	No	No	Yes	Yes	No	No	No	Cushioned,Stability		Calories,Heart Rate Variability,Floors,Intensity minutes,Max HR,Resting HR,Sleep,Steps,VO2MAX		Ankle Injury,Blisters,Chafing,IT Band Syndrome,Knee Injury,Tendonitus (Achilles tendinopathy)		None		Physiotherapist
EN	Europe		Republic of Ireland		Male		53	20	81-100%	3:16-3:30	44	45	0-10	It is a way of life,Keeping fit and healthy,Sense of accomplishment,To reach certain milestones,Travel						Detractor	2	None of these		Regular (including foods from all food groups)		Yes (positive test)	Unusual fatigue		35	No	Yes	No	Yes	Yes	No	No	Yes	Stability		VO2MAX		Blisters,Knee Injury,Shin Splints		Elevation,Foam Rolling,Pain Relief,Rest,Stretching		Physiotherapist		Yes	No
EN	Europe		Northern Ireland		Male		66	151	61-80%	2:46-3:00	23	24	11-20	Keeping fit and healthy,Social life,Total numbers				Promoter	10	Detractor	0	Atlas 100-mile club milestones		Pesco-vegetarian (includes fish)		Yes (positive test)	None		67	No	No	Yes	Yes	No	No			Cushioned		Resting HR,VO2MAX		Ankle Injury,Blisters,Chafing,Calf Injury,Hip Injury,IT Band Syndrome		Other - Please Specify	Infra red lamp. Tui Na. Yoga	No I do not seek professional advise for running injuries		No	No
EN	Europe		Northern Ireland		Male		36	75	41-60%	3:31-3:45	30	33	11-20	It is a way of life,Keeping fit and healthy,Sense of accomplishment,Social life						Detractor	0	Atlas 100-mile club milestones		Regular (including foods from all food groups)		Yes (positive test)	Shortness of breath,Unusual fatigue		100	No	Yes	Yes	Yes	Yes	No	No	No	Cushioned		None		Calf Injury,Knee Injury,Runners Knee,Shin Splints		Compression,Pain Relief,Rest		Specialist or other- Please detail here:		Yes	No
EN	Europe		Other European Country	Netherlands	Male		50	114	0-20%	2:31-2:45	18	19	11-20	Continuous performance improvement,It is a way of life,Keeping fit and healthy,To reach certain milestones,Travel				Passive	7			Marathon Globetrotters		Vegetarian (excludes fish, poultry, and meat)		Yes (positive test)	None		80	No	No	No	Yes	No	No	No		Light weight		Heart Rate Variability,Intensity minutes,Resting HR,VO2MAX		Blisters,Plantar Fasciitis,Tendonitus (Achilles tendinopathy)		Stretching		No I do not seek professional advise for running injuries		No	No
EN	Europe		Other European Country	Czech Republic	Male		46	85	81-100%	3:01-3:15	34	36	11-20	It is a way of life,Sense of accomplishment,Social life,To reach certain milestones,Total numbers,Travel						Detractor	0	Marathon Globetrotters		Prefer not to say		Yes (positive test)	None		70	No	No	No	Yes	No	No	No		Cushioned		Heart Rate Variability		None		Rest,Stretching		No I do not seek professional advise for running injuries		No	No
EN	Europe		Other European Country	Isle of Man	Male		46	20	0-20%	3:16-3:30	30	30	0-10	Awards,Competition,It is a way of life,Keeping fit and healthy,Sense of accomplishment,To reach certain milestones						Passive	7	Atlas 100-mile club milestones,Other - Please specify	1911 Centurion	Regular (including foods from all food groups)		Yes (positive test)	None		120	Yes	No	Yes	Yes	Yes	No	Yes	No	Cushioned		Heart Rate Variability,Resting HR,Sleep,Steps,Stress		Blisters,Chafing,Hypothermia,Muscle Pull,Runners Knee		Foam Rolling,Stretching		Specialist or other- Please detail here:	Monthly sports massage	No	No
EN	North America	Canada			Female		62	179	21-40%	3:16-3:30	24	30	0-10	Competition,Continuous performance improvement,It is a way of life,Keeping fit and healthy,Sense of accomplishment,To reach certain milestones,Travel				Passive	7			7 continents,100 Marathons from your national club,Abbot Marathon Majors 6 stars,Marathon Globetrotters,Marathon Maniacs		Regular (including foods from all food groups)		Yes (positive test)	None		70	Yes	No	No	Yes	Yes	No	Yes	No	Stability		Heart Rate Variability,Resting HR,Steps		Ankle Injury,Blisters,Chafing,Calf Injury,Frostbite,Heat Exhaustion,Hip Injury,Hypothermia,IT Band Syndrome,Knee Injury,Muscle Pull,Plantar Fasciitis,Runners Knee,Shin Splints,Tendonitus (Achilles tendinopathy)		Support strapping,Other - Please Specify	Physiotherapy	Physiotherapist		No	No
EN	Europe		Northern Ireland		Male		39	14	61-80%	2:46-3:00	20	20	0-10	Competition,Continuous performance improvement,It is a way of life,Keeping fit and healthy,Sense of accomplishment,To reach certain milestones,Travel						Detractor	2	Abbot Marathon Majors 6 stars		Vegetarian (excludes fish, poultry, and meat)		Yes (positive test)	None		65	Yes	Yes	Yes	Yes	Yes	No	Yes	Yes	Cushioned,Light weight,Other - Please specify	Trail shoes XC spikes	Resting HR,Steps,VO2MAX		Ankle Injury,Chafing,Other - Please specify	Hamstring Tendinopathy	Elevation,Ice (Ice packs or cold compresses),Rest,Other - Please Specify	Progressive overload strengthening	Physiotherapist		No	No
EN	North America	Canada			Female		43	57	41-60%	3:46-4:00	22	23	0-10	It is a way of life,Keeping fit and healthy,Sense of accomplishment						Detractor	0	Marathon Maniacs		Pesco-vegetarian (includes fish)		No			60	No	No	No	Yes	Yes	No	No	Yes	Cushioned		Floors,Resting HR,Sleep,Steps		Ankle Injury,Blisters,Chafing		Compression,Elevation,Foam Rolling,Ice (Ice packs or cold compresses),Pain Relief,Rest,RICE (Rest Ice Compression Elevation),Support strapping,Stretching		Physiotherapist,Specialist or other- Please detail here:	Massage therapist	No	No
EN	Australia/Oceania	New Zealand			Male		49	40	0-20%	3:31-3:45	32	34	0-10	Keeping fit and healthy,Others - Please specify	I repeat what I do, it's a tradition! 😀					Detractor	2	Abbot Marathon Majors 6 stars,Marathon Globetrotters,Marathon Maniacs		Other (Please specify)	Pesciterian	Yes (positive test)	Other (Please specify)	Had it less than a month ago	40	No	No	No	Yes	No	No	No		Light weight,Minimal e.g. Vibram or flip flops		Resting HR,Sleep,Steps,Stress,VO2MAX		Blisters		None		Physiotherapist		No	No
EN	Australia/Oceania	Australia			Male		30	5	0-20%	3:46-4:00	28	29	0-10	Competition,Continuous performance improvement,It is a way of life,Keeping fit and healthy,Sense of accomplishment						Detractor	6	None of these		Regular (including foods from all food groups)		Yes (positive test)	None		60	No	No	No	Yes	No	Yes	Yes		Cushioned,Light weight		Resting HR,Sleep		Ankle Injury,Blisters,Chafing,Heat Exhaustion,Hypothermia,Knee Injury,Muscle Pull,Runners Knee		Rest,RICE (Rest Ice Compression Elevation),Stretching		Physiotherapist		No	No
EN	Asia	Thailand			Female		53	66	81-100%	3:31-3:45	42	42	0-10	Continuous performance improvement,Keeping fit and healthy,Sense of accomplishment,Social life,To reach certain milestones,Travel						Detractor	0	7 continents,Abbot Marathon Majors 6 stars,Marathon Globetrotters,Other - Please specify	Marathon Country Club	Regular (including foods from all food groups)		Probably yes (no positive test)	None		50	No	No	No	Yes	No	No	No		Cushioned		Calories,Heart Rate Variability,Floors,Intensity minutes,Pulse Ox,Respiration,Resting HR,Sleep,Steps,Stress,VO2MAX		Blisters,Chafing,Morton's Neuroma		Accupuncture,Elevation,Foam Rolling,Ice (Ice packs or cold compresses),Rest,RICE (Rest Ice Compression Elevation),Stretching,Other - Please Specify	Massages	Physiotherapist,Specialist or other- Please detail here:	Acupunturists	No	No
EN	Asia	Indonesia			Female		47	89	0-20%	>6:00	41	42	>51	Continuous performance improvement,Keeping fit and healthy,Multi Marahon Series (e.g. 10 in 10 days),Travel		Other - Please specify	3 in 3, 4 in 4 and 6 in 6			Passive	8	Marathon Globetrotters,Marathon Maniacs,Other - Please specify	3 m 3 d in 4 years in a row Cairns Australia	Prefer not to say		No			80	No	Yes	Yes	Yes	Yes	No		No	Light weight		Calories		Blisters		None		No I do not seek professional advise for running injuries		No	No
EN	North America	United States			Male		46	35	0-20%	3:46-4:00	10	44	11-20	Continuous performance improvement,It is a way of life,Keeping fit and healthy,Sense of accomplishment,Social life,Travel						Detractor	4	50 US states,Triple crown of Ultras (Comrades, Western States, UTMB)		Pesco-vegetarian (includes fish)		Probably yes (no positive test)	None		100	Yes	No	No	Yes	No	Yes	No		Cushioned,Light weight		Calories,Heart Rate Variability,Floors,Intensity minutes,Max HR,Pulse Ox,Respiration,Resting HR,Sleep,Steps,Stress,VO2MAX		Ankle Injury,Blisters,Chafing,Calf Injury,Hip Injury,Hypothermia,IT Band Syndrome,Knee Injury,Muscle Pull,Plantar Fasciitis,Runners Knee,Shin Splints,Stress Fracture		Compression,Elevation,Rest,Other - Please Specify	Deep tissue laser Shockwave Active Release Chiropractic	Physiotherapist		Yes	No
EN	Europe		Other European Country	Poland	Male		45	156	81-100%	4:01-4:15	40	34	21-30	It is a way of life,Keeping fit and healthy,Social life,Travel,Others - Please specify	My project 249challenge.com			Promoter	9	Passive	8	100 Marathons from your national club,Abbot Marathon Majors 6 stars,Global Marathon challenges,Marathon Globetrotters,Marathon Maniacs,Other - Please specify	Marathon Country Club	Other (Please specify)	Sometimes but it’s hard because of constant travels	Yes (positive test)	None		20	No	Yes	No	Yes	Yes	No	No	No	Cushioned		Calories		Blisters,Runners Knee		Compression		Physiotherapist		No	No
EN	Europe		Germany		Male		46	112	61-80%	2:46-3:00	22	23	0-10	It is a way of life,Social life,Travel				Detractor	5	Detractor	6	100 Marathon club UK milestones,Global Marathon challenges,Marathon Globetrotters,Other - Please specify	Marathonziel60 Multi Endurance International Award Country Marathon Club	Other (Please specify)	Regular, but reduced meat by 80 percent	No			50	No	No	No	No	No				Stability		None		Blisters,Muscle Pull,Other - Please specify	March Hemoglobinurea	Rest,Stretching		No I do not seek professional advise for running injuries		No	No
EN	North America	USA			Male		65	53	21-40%	3:01-3:15	40	40	0-10	Competition,Continuous performance improvement,It is a way of life,Keeping fit and healthy,To reach certain milestones,Others - Please specify	Stress reduction					Detractor	5	Other - Please specify	My own personal clubs: 1) to accomplish 100,000 miles (= 4 roundtrips of the globe) 2) to accomplish goals of: All American, National Champion and World Championship	Vegan		Yes (positive test)	None		50	No	No	No	No	No				Stability,Light weight		Heart Rate Variability,Max HR		Blisters,Chafing,Calf Injury,IT Band Syndrome,Tendonitus (Achilles tendinopathy)		Pain Relief,Rest		Another Medical Professional (e.g. Physician, A&E)		Yes	Yes
EN	Europe		England		Male		64	1178		3:16-3:30			31-40	Social life						Promoter	10	None of these		Regular (including foods from all food groups)		Yes (positive test)	None		2	No	No	Yes	Yes	No	No			Light weight		None		Knee Injury		Rest		No I do not seek professional advise for running injuries		No	No
EN	South America	Trinidad and Tobago			Male		62	152	0-20%	3:16-3:30	34	34	11-20	Keeping fit and healthy,Sense of accomplishment,To reach certain milestones,Travel				Promoter	9	Detractor	4	100 Marathon club UK milestones,Abbot Marathon Majors 6 stars,Global Marathon challenges,Marathon Globetrotters,Marathon Maniacs		Regular (including foods from all food groups)		Yes (positive test)	None		65	No	No	Yes	Yes	No	No			Cushioned,Light weight		Other - Please Specify	Mileage	Calf Injury,Shin Splints,Tendonitus (Achilles tendinopathy)		Compression,Ice (Ice packs or cold compresses),Rest,RICE (Rest Ice Compression Elevation),Support strapping,Stretching		Physiotherapist,Specialist or other- Please detail here:	Chiropractor for lower back pain	No	No
EN	Europe		Italy		Male		51	153	81-100%	3:31-3:45	23	23	0-10	It is a way of life,Sense of accomplishment				Promoter	9	Passive	7	100 Marathons from your national club		Regular (including foods from all food groups)		No			30	No	No	Yes	Yes	Yes	No	No	Yes	Minimal e.g. Vibram or flip flops		Calories,Floors,Intensity minutes,Max HR,Pulse Ox,Sleep,Steps,Stress,VO2MAX		Blisters		Compression,Rest,Stretching,Other - Please Specify	L	No I do not seek professional advise for running injuries		No	Yes
EN	Europe		Italy		Male		38	4	21-40%	4:16-4:30	36	36	0-10	Competition,Sense of accomplishment,Social life,Travel						Passive	8	Other - Please specify	UTMB	Regular (including foods from all food groups)		No			90	Yes	Yes	Yes	Yes	No	Yes	Yes		Stability,Light weight,Minimal e.g. Vibram or flip flops		Calories,Heart Rate Variability,Intensity minutes,VO2MAX		Hypothermia		None		No I do not seek professional advise for running injuries		No	No
EN	Europe		Italy		Male		58	166	61-80%	3:46-4:00	48	43	11-20	Competition,It is a way of life,Keeping fit and healthy,Travel				Passive	7	Detractor	6	100 Marathons from your national club		Regular (including foods from all food groups)		No			45	No	No	Yes	Yes	No	No	No		Cushioned,Light weight		Heart Rate Variability,Intensity minutes		None		Rest,Stretching		No I do not seek professional advise for running injuries		No	No
EN	Europe		Italy		Male		45	67	41-60%	4:16-4:30	42	42	11-20	It is a way of life,Keeping fit and healthy,Social life,Travel						Passive	8	100 Marathons from your national club		Regular (including foods from all food groups)		Yes (positive test)	None		60	No	No	Yes	Yes	Yes	Yes	No	No	Cushioned		Heart Rate Variability,Intensity minutes,Sleep,Steps		None		Foam Rolling,Ice (Ice packs or cold compresses)		No I do not seek professional advise for running injuries		No	No
EN	Europe		Italy		Male		67	360	81-100%	2:46-3:00	45	45	11-20	It is a way of life,Keeping fit and healthy,Sense of accomplishment,Social life,Travel				Detractor	6	Detractor	6	100 Marathons from your national club,World Mega Marathon ranking 300+		Regular (including foods from all food groups)		No			60	No	No	Yes	Yes	No	No			Light weight		Max HR,Respiration,VO2MAX		Blisters,Chafing,Hypothermia,Muscle Pull,Plantar Fasciitis		Foam Rolling,Rest,Stretching		Physiotherapist		No	No
EN	North America	USA			Female		70	546	61-80%	3:46-4:00	31	31	11-20	It is a way of life,Keeping fit and healthy,Sense of accomplishment,Social life,To reach certain milestones,Travel				Passive	7	Detractor	6	7 continents,50 US states,100 Marathons from your national club,Marathon Globetrotters,Marathon Maniacs,World Mega Marathon ranking 300+		Vegetarian (excludes fish, poultry, and meat)		Yes (positive test)	None		80	No	Yes	No	Yes	Yes	No	No	No	Cushioned		Calories,Floors,Intensity minutes,Sleep,Steps		Blisters,Chafing,Plantar Fasciitis,Shin Splints		Foam Rolling,Pain Relief,Stretching		No I do not seek professional advise for running injuries		Yes	No
EN	Europe		Italy		Male		47	133	61-80%	4:01-4:15	37	37	11-20	Awards,It is a way of life,Keeping fit and healthy,Social life,Total numbers,Travel				Promoter	9	Promoter	9	100 Marathons from your national club		Regular (including foods from all food groups)		Yes (positive test)	Elevated Heart rate		42	No	No	Yes	Yes	Yes	No	No	No	Cushioned,Stability		Calories		None		Stretching		No I do not seek professional advise for running injuries		No	No
EN	Australia/Oceania	New Zealand			Male		54	24	61-80%	3:46-4:00	49	49	0-10	Keeping fit and healthy,Sense of accomplishment						Detractor	0	None of these		Regular (including foods from all food groups)		Yes (positive test)	Elevated Heart rate,Forced to stop running for a period,Muscle aches,Shortness of breath,Unusual fatigue		80	Yes	No	No	Yes	No	Yes	Yes		Cushioned		Heart Rate Variability,Max HR,Resting HR,VO2MAX		IT Band Syndrome,Runners Knee		Support strapping		No I do not seek professional advise for running injuries		No	No
EN	North America	USA			Male		65	110	41-60%	3:31-3:45	25	27	0-10	Competition,It is a way of life,Keeping fit and healthy,Sense of accomplishment				Passive	8	Detractor	6	None of these		Vegetarian (excludes fish, poultry, and meat)		No			80	No	Yes	No	Yes	Yes	No	No	No	Cushioned,Light weight		Calories,Intensity minutes		Blisters,Heat Exhaustion,Muscle Pull		Ice (Ice packs or cold compresses),Rest		No I do not seek professional advise for running injuries
EN	Europe		Italy		Male		57	422	81-100%	3:16-3:30	43	37	21-30	It is a way of life				Passive	8			100 Marathons from your national club,World Mega Marathon ranking 300+,Other - Please specify	Marathon country club	Regular (including foods from all food groups)		Yes (positive test)	None		101	No	No	Yes	No	No				Cushioned		None		Blisters		Rest		No I do not seek professional advise for running injuries		No	No
EN	Europe		Other European Country	Estonia	Male		51	116	61-80%	3:16-3:30	35	35	11-20	Continuous performance improvement,Sense of accomplishment,Social life,To reach certain milestones,Total numbers				Passive	8	Detractor	5	100 Marathons from your national club		Regular (including foods from all food groups)		No			60	No	No	No	Yes	No	Yes	No		Cushioned		Heart Rate Variability,Max HR,VO2MAX		Blisters,Chafing,Calf Injury,Muscle Pull,Shin Splints		Compression,Pain Relief,Rest,Support strapping		No I do not seek professional advise for running injuries		Yes	No
EN	North America	United States			Male		57	281	0-20%	2:46-3:00	12	18	11-20	Keeping fit and healthy,Running streaks,Social life,To reach certain milestones,Travel				Passive	8	Promoter	9	50 US states,100 Marathons from your national club,100 Marathon club UK milestones,Abbot Marathon Majors 6 stars,Global Marathon challenges,Marathon Globetrotters,Marathon Maniacs		Regular (including foods from all food groups)		No			45	No	No	No	No	Yes			No	Stability		Heart Rate Variability,Steps		Ankle Injury,Other - Please specify	Unrelated to running. Broke ankle fell on ice while walking down stairs. No overuse injuries	Rest		No I do not seek professional advise for running injuries		No	No
EN	North America	United States			Female		56	102	21-40%	5:01-5:15	46	47	11-20	It is a way of life,Keeping fit and healthy,Sense of accomplishment,Social life,Travel				Detractor	6			50 US states,100 Marathons from your national club,Marathon Maniacs		Regular (including foods from all food groups)		Yes (positive test)	Elevated Heart rate,Heart Palpitations,Unusual fatigue		42	No	No	No	Yes	No	No	No		Cushioned,Light weight		None		Blisters,Calf Injury,IT Band Syndrome		RICE (Rest Ice Compression Elevation),Stretching		No I do not seek professional advise for running injuries		No	No
EN	Europe		Republic of Ireland		Male		54	63	81-100%	3:01-3:15	28	46	0-10	Continuous performance improvement,It is a way of life,Keeping fit and healthy,Sense of accomplishment,To reach certain milestones						Detractor	5	100 Marathons from your national club,Abbot Marathon Majors 6 stars		Regular (including foods from all food groups)		Yes (positive test)	None		100	Yes	Yes	Yes	Yes	Yes	Yes	Yes	Yes	Cushioned,Light weight,Other - Please specify	ASICS Gel Kayano for training and Nike Vaporflys for races	Heart Rate Variability,Intensity minutes,Max HR,Resting HR,VO2MAX		None		Foam Rolling,Stretching,Other - Please Specify	Yoga, core strength and conditioning and deep tissue massage	Physiotherapist,Specialist or other- Please detail here:	I go to physio twice per week to prevent injuries	No	No
EN	South America	Brasil			Female		53	30	81-100%	4:01-4:15	43	45	0-10	Continuous performance improvement,It is a way of life,Sense of accomplishment,Social life,Travel						Detractor	3	None of these		Paleo		No			110	Yes	Yes	No	Yes	Yes	Yes	Yes	Yes	Stability,Light weight		Max HR		Ankle Injury,Blisters,Chafing,Calf Injury		Rest,Stretching		Physiotherapist,Another Medical Professional (e.g. Physician, A&E)		Yes	No
EN	North America	USA			Male		69	599	61-80%	3:31-3:45	28	28	>51	It is a way of life,Keeping fit and healthy,Multi Marahon Series (e.g. 10 in 10 days),Sense of accomplishment,To reach certain milestones,Total numbers		5 in 5 days,Back to Back		Promoter	10	Detractor	1	50 US states,100 Marathons from your national club,Marathon Maniacs,Mega Marathons,World Mega Marathon ranking 300+		Paleo		Yes (positive test)	None		60	No	No	No	Yes	No	No	No		Cushioned		None		Blisters,Morton's Neuroma,Stress Fracture		Pain Relief		Another Medical Professional (e.g. Physician, A&E)		Yes	No
EN	Europe		Republic of Ireland		Female		47	25	0-20%	3:31-3:45	38	38	11-20	It is a way of life,Keeping fit and healthy,Sense of accomplishment						Detractor	2	None of these		Regular (including foods from all food groups)		No			120	No	Yes	No	Yes	Yes	No	No		Stability		Calories,Heart Rate Variability,Max HR,Resting HR,Sleep,Steps,VO2MAX		IT Band Syndrome,Stress Fracture		Accupuncture,Foam Rolling		Physiotherapist		No	No
EN	Europe		Denmark		Male		55	824	81-100%	2:46-3:00	30	31	41-50	It is a way of life,Keeping fit and healthy,Social life,Travel				Passive	8	Promoter	9	100 Marathons from your national club,Abbot Marathon Majors 6 stars,Marathon Globetrotters,World Mega Marathon ranking 300+,Other - Please specify	ZClub7 Country Club Marathon	Regular (including foods from all food groups)		Yes (positive test)	Shortness of breath		80	No	Yes	Yes	Yes	Yes	No	No	Yes	Cushioned,Stability,Light weight		Heart Rate Variability,VO2MAX		Ankle Injury,Blisters,Chafing,Hip Injury,IT Band Syndrome,Knee Injury,Runners Knee		Foam Rolling,RICE (Rest Ice Compression Elevation),Stretching,Other - Please Specify	Kinesio	Physiotherapist,Another Medical Professional (e.g. Physician, A&E),Specialist or other- Please detail here:	Doctor	No	Yes
EN	Europe		England		Female		56	187	0-20%	4:01-4:15	35	35	11-20	Continuous performance improvement,It is a way of life,Keeping fit and healthy,Sense of accomplishment,Social life,To reach certain milestones,Total numbers,Travel				Promoter	10	Detractor	5	Abbot Marathon Majors 6 stars,Marathon Globetrotters,Marathon Maniacs		Vegan		No			60	Yes	Yes	Yes	Yes	No	No			Cushioned,Stability		Resting HR,Sleep,Steps		Ankle Injury,Blisters,Chafing,Hip Injury,Knee Injury,Muscle Pull,Morton's Neuroma,Shin Splints,Stress Fracture,Other - Please specify	Dislocated then frozen shoulders, broken bone in wrist, chipped bone in elbow, muscle pull - glute, SI joint.	Accupuncture,Compression,Elevation,Foam Rolling,Ice (Ice packs or cold compresses),Pain Relief,Rest,RICE (Rest Ice Compression Elevation),Support strapping,Stretching		Physiotherapist,Another Medical Professional (e.g. Physician, A&E),Specialist or other- Please detail here:	MSK, Consult for back.	Yes	No
EN	Europe		England		Male		52	16	0-20%	3:46-4:00	42	43	0-10	Keeping fit and healthy,Sense of accomplishment,Social life						Passive	7	None of these		Vegetarian (excludes fish, poultry, and meat)		Yes (positive test)	None		20	No	Yes	No	Yes	No	No	No		Stability		Steps		Ankle Injury,Blisters,Chafing,Calf Injury,Heat Exhaustion,Knee Injury,Muscle Pull,Runners Knee,Shin Splints		Ice (Ice packs or cold compresses),Pain Relief,Support strapping,Stretching		Physiotherapist		Yes	No
EN	North America	USA			Female		49	281	81-100%	3:46-4:00	31	31	21-30	It is a way of life,Keeping fit and healthy,Sense of accomplishment,Social life,To reach certain milestones,Total numbers,Travel,Others - Please specify	I am a Pacer and love to see others reach their goals and dreams			Promoter	10	Detractor	5	50 US states,100 Marathons from your national club,Abbot Marathon Majors 6 stars,Marathon Maniacs,Mega Marathons		Vegetarian (excludes fish, poultry, and meat)		Probably yes (no positive test)	Unusual fatigue		40	No	No	No	Yes	No	No	No		Minimal e.g. Vibram or flip flops		None		Ankle Injury,Blisters,Chafing,Calf Injury,Heat Exhaustion,Knee Injury,Muscle Pull,Runners Knee,Stress Fracture		Accupuncture,Compression,Elevation,Foam Rolling,Ice (Ice packs or cold compresses),Pain Relief,Rest,RICE (Rest Ice Compression Elevation),Stretching		Specialist or other- Please detail here:	Licensed Massage Therapist, acupuncturist, chiropractor	No	No
EN	North America	USA			Male		62	447	21-40%	3:16-3:30	41	41	21-30	It is a way of life,Keeping fit and healthy,Sense of accomplishment,Social life,To reach certain milestones,Travel				Passive	8	Detractor	5	50 US states,100 Marathons from your national club,Marathon Maniacs,World Mega Marathon ranking 300+		Vegetarian (excludes fish, poultry, and meat)		Yes (positive test)	None
EN	South America	Brazil			Male		48	31	61-80%	3:16-3:30	39	39	0-10	Sense of accomplishment						Detractor	1	Marathon Globetrotters		Regular (including foods from all food groups)		No			50	No	Yes	Yes	Yes	No	No	No		Cushioned,Stability		None		IT Band Syndrome		Foam Rolling,Other - Please Specify	Chiropractic	Physiotherapist,Specialist or other- Please detail here:	Chiropractic	No	No
EN	South America	Brazil			Male		44	70	81-100%	3:16-3:30	30	31	0-10	It is a way of life						Detractor	5	Marathon Maniacs		Regular (including foods from all food groups)		Yes (positive test)	None		50	No	No	No	Yes	Yes	No	No	Yes	Stability		VO2MAX		None		Rest		Another Medical Professional (e.g. Physician, A&E)		No	Yes
EN	South America	Brasil			Male		37	3	0-20%	4:31-4:45	21	10	0-10	Travel						Detractor	0	7 continents		Paleo		No			60	Yes	Yes	Yes	Yes	Yes	Yes	Yes	Yes	Cushioned		Heart Rate Variability		Chafing		Compression		Another Medical Professional (e.g. Physician, A&E)		Yes	Yes
EN	South America	Brasil			Male		44	9	81-100%	4:16-4:30	31	33	0-10	It is a way of life						Detractor	6	None of these		Regular (including foods from all food groups)		No			30	Yes	Yes	Yes	No	No				Motion Control (made to support heavy weight, flat feet or severe overpronation)		Intensity minutes		None		Ice (Ice packs or cold compresses)		Physiotherapist		No	Yes
EN	South America	Brazil			Male		36	6	81-100%	3:31-3:45	28	32	0-10	Competition,Continuous performance improvement,It is a way of life						Detractor	0	None of these		Paleo		Yes (positive test)	Muscle aches,Unusual fatigue		45	Yes	Yes	Yes	Yes	Yes	Yes	Yes	No	Stability		Heart Rate Variability,Intensity minutes,Sleep,VO2MAX		Hypothermia,Runners Knee		Ice (Ice packs or cold compresses),Rest,Stretching		Physiotherapist		No	Yes
EN	South America	Ireland			Male		43	8	81-100%	3:31-3:45	35	38	0-10	It is a way of life						Detractor	0	None of these		Prefer not to say		No			50	Yes	Yes	No	Yes	No	No			Cushioned		None		Hip Injury,Shin Splints		Accupuncture,Compression,Foam Rolling,Ice (Ice packs or cold compresses),Pain Relief,Rest,RICE (Rest Ice Compression Elevation),Support strapping,Stretching		Physiotherapist		No	No
EN	Europe		Republic of Ireland		Female		42	9	81-100%	3:31-3:45	40	40	0-10	Continuous performance improvement,Keeping fit and healthy,Sense of accomplishment						Detractor	4	None of these		Regular (including foods from all food groups)		Yes (positive test)	Elevated Heart rate,Muscle aches,Shortness of breath		50	Yes	Yes	No	Yes	No	Yes	Yes		Cushioned		Heart Rate Variability,Max HR,Pulse Ox,Respiration,Resting HR,Sleep,Steps,Stress,VO2MAX		Blisters,Chafing		Compression,Ice (Ice packs or cold compresses),Rest,Stretching		Physiotherapist		No	No
EN	Europe		Republic of Ireland		Female		38	7	81-100%	4:01-4:15	35	35	0-10	Sense of accomplishment						Promoter	9	Abbot Marathon Majors 6 stars		Vegan		Yes (positive test)	None		40	Yes	No	No	Yes	No	Yes	No		Cushioned,Light weight		Calories,Heart Rate Variability,Floors,Intensity minutes,Max HR,Pulse Ox,Respiration,Resting HR,Sleep,Steps,Stress,VO2MAX		Blisters,Chafing,Frostbite,Stress Fracture		Rest		Physiotherapist		No	No
EN	Europe		Republic of Ireland		Male		50	28	81-100%	2:46-3:00	36	37	0-10	Continuous performance improvement,It is a way of life,Keeping fit and healthy,Sense of accomplishment,Social life,Travel						Detractor	0	None of these		Regular (including foods from all food groups)		Yes (positive test)	None		70	Yes	No	Yes	Yes	No	No	Yes		Cushioned,Light weight		Resting HR,Sleep,VO2MAX		Ankle Injury,Blisters,Calf Injury,IT Band Syndrome		Foam Rolling,Pain Relief,Rest		Physiotherapist		No	No
EN	South America	Brazil			Female		63	114	81-100%	3:46-4:00	48	48	11-20	Competition,Continuous performance improvement,It is a way of life,Keeping fit and healthy,Total numbers,Travel				Promoter	10			50 US states,Abbot Marathon Majors 6 stars		Regular (including foods from all food groups)		No			70	Yes	Yes	No	Yes	No	Yes	Yes		Cushioned,Stability		Calories,Heart Rate Variability,Floors,Intensity minutes,Sleep,VO2MAX		None		None		Physiotherapist		No	No
EN	South America	Brazil			Male		42	5	81-100%	3:31-3:45	37	38	0-10	Continuous performance improvement,It is a way of life,Keeping fit and healthy,Sense of accomplishment						Detractor	3	None of these		Paleo		Yes (positive test)	None		25	Yes	Yes	Yes	Yes	Yes	Yes	No	No	Cushioned,Light weight		Calories,Heart Rate Variability,Resting HR,Sleep,VO2MAX
EN	Europe		Republic of Ireland		Male		52	68	81-100%	5:01-5:15	47	47	11-20	Awards,It is a way of life,Keeping fit and healthy,Sense of accomplishment,Others - Please specify	Friendship					Promoter	10	MCI Ireland club milestones		Regular (including foods from all food groups)		No			50	No	Yes	No	Yes	Yes	No	No	No	Cushioned		Sleep,VO2MAX		None		Foam Rolling,Rest		No I do not seek professional advise for running injuries		No	No
EN	Europe		Other European Country	France	Male		47	22	81-100%	2:46-3:00	30	34	0-10	Competition,Continuous performance improvement,It is a way of life,Keeping fit and healthy						Detractor	3	None of these		Vegan		Yes (positive test)	Shortness of breath,Unusual fatigue		50	No	Yes	Yes	Yes	Yes	Yes	Yes	No	Light weight		Heart Rate Variability,Max HR,VO2MAX		Knee Injury,Runners Knee,Tendonitus (Achilles tendinopathy)		Rest,Stretching,Surgery		Specialist or other- Please detail here:	Ostheopathe	No	No
EN	Europe		Northern Ireland		Female		43	26	81-100%	2:46-3:00	37	37	0-10	Competition,Keeping fit and healthy						Detractor	1	None of these		Vegetarian (excludes fish, poultry, and meat)		Yes (positive test)	Shortness of breath,Unusual fatigue		100	Yes	Yes	Yes	Yes	No	No	No		Light weight		Intensity minutes,Resting HR,Steps,VO2MAX		Ankle Injury,Blisters,Hip Injury,Stress Fracture		Foam Rolling,Pain Relief,Stretching		No I do not seek professional advise for running injuries		Yes	No
EN	Europe		England		Female		38	102	0-20%	4:31-4:45	30	32	11-20	It is a way of life,Keeping fit and healthy,Sense of accomplishment,Travel				Promoter	10	Detractor	5	100 Marathon club UK milestones,Global Marathon challenges,Mega Marathons		Regular (including foods from all food groups)		Yes (positive test)	Elevated Heart rate,Heart Palpitations,Muscle aches,Shortness of breath,Unusual fatigue		20	No	No	No	Yes	No	No	No		Motion Control (made to support heavy weight, flat feet or severe overpronation)		Intensity minutes,Steps		Ankle Injury,Calf Injury,Hip Injury,IT Band Syndrome,Plantar Fasciitis,Shin Splints,Tendonitus (Achilles tendinopathy)		Compression,Support strapping,Stretching		No I do not seek professional advise for running injuries		Yes	No
EN	Europe		England		Male		56	252	0-20%	3:31-3:45	38	38	21-30	It is a way of life				Passive	8			100 Marathons from your national club,Global Marathon challenges,Mega Marathons		Vegetarian (excludes fish, poultry, and meat)		No			1	No	No	Yes	Yes	Yes	No	No	No	Other - Please specify	Cheapest ones i can get	None		Shin Splints		Rest		No I do not seek professional advise for running injuries		Yes	No
EN	Europe		England		Male		64	417	81-100%	3:46-4:00	45	46	31-40	It is a way of life,Keeping fit and healthy,Sense of accomplishment,Social life,To reach certain milestones,Travel				Promoter	10	Detractor	0	100 Marathon club UK milestones,Other - Please specify	50 counties, 100 each of road, trail, ultra	Other (Please specify)	Type 1 diabetic, so generally low carb	Yes (positive test)	None		75	Yes	No	Yes	Yes	Yes	Yes	No	No	Cushioned		Floors,Resting HR,Sleep,Steps,VO2MAX		Blisters,Chafing,Heat Exhaustion,Knee Injury,Muscle Pull,Plantar Fasciitis,Shin Splints		Foam Rolling,Pain Relief,Rest,Stretching,Other - Please Specify	Massage	No I do not seek professional advise for running injuries		No	No
EN	Europe		England		Male		57	108	41-60%	2:46-3:00	33	33	0-10	Competition,Sense of accomplishment				Promoter	10	Detractor	2	100 Marathons from your national club		Regular (including foods from all food groups)		No			35	Yes	No	Yes	Yes	No	No	No		Other - Please specify	Normal road shoes or trail shoes	None		Blisters,IT Band Syndrome,Muscle Pull,Shin Splints		Rest,RICE (Rest Ice Compression Elevation),Stretching		Physiotherapist,Another Medical Professional (e.g. Physician, A&E)		No	Yes
EN	Europe		England		Female		47	359	0-20%	5:01-5:15	40	40	21-30	It is a way of life,Keeping fit and healthy,Sense of accomplishment,Social life				Passive	7	Detractor	1	100 Marathon club UK milestones,Global Marathon challenges,Mega Marathons,World Mega Marathon ranking 300+		Regular (including foods from all food groups)		Yes (positive test)	Elevated Heart rate,Shortness of breath		15	No	Yes	No	Yes	No	No	No		Cushioned		Heart Rate Variability,Floors,Intensity minutes,Max HR,Resting HR,Sleep,Steps,VO2MAX		Blisters,Chafing,Morton's Neuroma,Plantar Fasciitis		Rest,RICE (Rest Ice Compression Elevation),Stretching		No I do not seek professional advise for running injuries		No	No
EN	North America	USA			Male		42	15	81-100%	5:01-5:15	40	37	11-20	It is a way of life,Keeping fit and healthy,Running streaks,Sense of accomplishment,Social life,Travel						Detractor	1	7 continents,50 US states,Abbot Marathon Majors 6 stars,Marathon Maniacs		Vegetarian (excludes fish, poultry, and meat)		Probably yes (no positive test)	Elevated Heart rate,Muscle aches,Shortness of breath,Unusual fatigue		30	Yes	No	Yes	Yes	Yes	Yes	Yes	Yes	Cushioned,Motion Control (made to support heavy weight, flat feet or severe overpronation),Stability		Heart Rate Variability,Intensity minutes,Resting HR,Sleep,Steps		Blisters,Chafing		Compression		No I do not seek professional advise for running injuries		No	No
EN	North America	United States			Male		62	83	61-80%	4:46-5:00	44	45	0-10	Awards,Continuous performance improvement,Keeping fit and healthy,Multi Marahon Series (e.g. 10 in 10 days),Sense of accomplishment,To reach certain milestones,Total numbers,Travel		5 in 5 days,Back to Back,Other - Please specify	7 in 7 days			Passive	7	50 US states		Regular (including foods from all food groups)		Yes (positive test)	Other (Please specify)	Congestion and cough	50	No	No	No	Yes	No	No	No		Cushioned		Heart Rate Variability,Resting HR		Blisters,Chafing,IT Band Syndrome,Muscle Pull		Compression,Elevation,Ice (Ice packs or cold compresses),Pain Relief,Rest,RICE (Rest Ice Compression Elevation)		No I do not seek professional advise for running injuries		Yes	No
EN	North America	USA			Female		47	30	81-100%	5:46:600	38	38	0-10	Keeping fit and healthy,Sense of accomplishment,To reach certain milestones,Travel						Detractor	3	7 continents,50 US states,Abbot Marathon Majors 6 stars,Marathon Maniacs		Regular (including foods from all food groups)		No			20	Yes	No	No	Yes	Yes	No	No	Yes	Light weight		Resting HR,Sleep,Steps		Ankle Injury,Morton's Neuroma,Plantar Fasciitis		Stretching,Other - Please Specify	Night splints Metatarsal cushion	Specialist or other- Please detail here:	Sports med physician	No	No
EN	Europe		England		Male		75	277	41-60%	2:31-2:45	24	30	0-10	It is a way of life,Keeping fit and healthy,Sense of accomplishment,Total numbers,Travel				Detractor	5	Passive	7	100 Marathon club UK milestones		Other (Please specify)	Whatever I feel like I eat	Yes (positive test)	None		50	No	Yes	Yes	Yes	No	No			Cushioned		None		Muscle Pull		Foam Rolling,Ice (Ice packs or cold compresses),Stretching,Other - Please Specify	Deep tissue massage	Physiotherapist		No	No
EN	North America	United States			Male		52	84	81-100%	3:31-3:45	31	31	11-20	It is a way of life,Keeping fit and healthy,Sense of accomplishment,Social life,Travel						Detractor	0	50 US states,Marathon Maniacs		Regular (including foods from all food groups)		No			35	Yes	No	Yes	Yes	Yes	Yes	No	Yes	Stability		Max HR,Resting HR,Steps,VO2MAX		None		Foam Rolling,Rest		Physiotherapist		No	Yes
EN	North America	USA			Male		42	162	81-100%	3:31-3:45	29	30	11-20	Continuous performance improvement,It is a way of life,Keeping fit and healthy,Travel				Detractor	6	Detractor	6	50 US states,100 Marathons from your national club,Abbot Marathon Majors 6 stars,Marathon Globetrotters,Marathon Maniacs		Regular (including foods from all food groups)		No			70	No	Yes	No	Yes	Yes	Yes	No	Yes	Cushioned,Light weight,Minimal e.g. Vibram or flip flops		Calories,Resting HR,Steps,VO2MAX		Ankle Injury,Blisters,Chafing,Heat Exhaustion,IT Band Syndrome,Muscle Pull,Shin Splints		Compression,Foam Rolling,Ice (Ice packs or cold compresses),Rest,RICE (Rest Ice Compression Elevation),Stretching		No I do not seek professional advise for running injuries		No	No
EN	North America	United States			Female		43	67	81-100%	4:46-5:00	34	34	0-10	Keeping fit and healthy,Sense of accomplishment,Social life,To reach certain milestones,Travel						Promoter	9	50 US states,Marathon Maniacs		Regular (including foods from all food groups)		Yes (positive test)	None		45	Yes	Yes	No	Yes	Yes	No	No	No	Cushioned,Stability		Steps,VO2MAX		Plantar Fasciitis		Stretching		Physiotherapist		Yes	No
EN	Europe		England		Male		56	186	81-100%	2:46-3:00	27	27	11-20	It is a way of life,Keeping fit and healthy,Travel				Promoter	10	Detractor	0	100 Marathons from your national club,100 Marathon club UK milestones		Regular (including foods from all food groups)		Yes (positive test)	None		40	No	No	Yes	Yes	No	No	No		Stability		None		Ankle Injury,Blisters,Chafing,Calf Injury,Runners Knee,Stress Fracture		RICE (Rest Ice Compression Elevation),Stretching		Another Medical Professional (e.g. Physician, A&E)		No	No
EN	North America	US			Male		60	12	81-100%	3:31-3:45	55	57	0-10	Awards,Competition,Continuous performance improvement,Keeping fit and healthy,Sense of accomplishment,Travel						Detractor	5	50 US states,Abbot Marathon Majors 6 stars		Regular (including foods from all food groups)		Yes (positive test)	None		45	Yes	Yes	No	Yes	No	No			Cushioned,Light weight		Calories,Max HR		Calf Injury,IT Band Syndrome		Stretching		No I do not seek professional advise for running injuries		No	No
EN	North America	US			Female		40	33	81-100%	3:31-3:45	26	25	0-10	It is a way of life,Keeping fit and healthy,Sense of accomplishment,To reach certain milestones						Detractor	1	50 US states		Regular (including foods from all food groups)		Yes (positive test)	None		40	No	No	No	Yes	Yes	No	No	No	Motion Control (made to support heavy weight, flat feet or severe overpronation)		None		Muscle Pull,Other - Please specify	SI joint pain	Other - Please Specify	Physical Therapy	Physiotherapist		No	No
EN	North America	United States			Male		52	75	81-100%	4:01-4:15	39	39	0-10	It is a way of life,Keeping fit and healthy,Travel,Others - Please specify	Mental health					Detractor	2	50 US states,Abbot Marathon Majors 6 stars,Marathon Maniacs		Other (Please specify)	While food plant based with some animal protein.	Yes (positive test)	Elevated Heart rate,Muscle aches,Shortness of breath,Unusual fatigue		40	Yes	No	Yes	Yes	No	No	No		Cushioned		Heart Rate Variability,Resting HR,Steps		Blisters,Plantar Fasciitis		Compression		No I do not seek professional advise for running injuries		No	No
EN	North America	United States of America			Female		43	84	0-20%	4:16-4:30	26	26	11-20	To reach certain milestones						Detractor	2	50 US states,Abbot Marathon Majors 6 stars,Marathon Maniacs		Regular (including foods from all food groups)		No			15	No	No	No	Yes	No	No			Stability		Max HR,Resting HR,Sleep,Steps,Stress		Blisters,Chafing,IT Band Syndrome,Knee Injury,Plantar Fasciitis		Compression		No I do not seek professional advise for running injuries		Yes	No
EN	Europe		England		Male		56	60	81-100%	3:31-3:45	50	49	11-20	To reach certain milestones,Total numbers,Travel						Promoter	9	100 Marathon club UK milestones		Regular (including foods from all food groups)		Yes (positive test)	None		30	No	No	No	Yes	Yes	Yes	Yes	Yes	Cushioned		None		Ankle Injury		Stretching		Physiotherapist,Another Medical Professional (e.g. Physician, A&E)		No	No
EN	Australia/Oceania	Australia			Male		65	154	61-80%	2:46-3:00	38	38	0-10	It is a way of life,Keeping fit and healthy,Sense of accomplishment,Social life,Travel,Others - Please specify	Fun and challenge			Detractor	5	Detractor	2	100 Marathons from your national club,Abbot Marathon Majors 6 stars		Paleo		No			30	Yes	No	No	Yes	No	Yes	No		Cushioned		Calories,Max HR,Resting HR		Ankle Injury,Blisters,Chafing,Calf Injury,IT Band Syndrome,Muscle Pull,Plantar Fasciitis,Runners Knee,Tendonitus (Achilles tendinopathy)		Accupuncture,Pain Relief,Rest,Other - Please Specify	Cortisone injection	Physiotherapist		No	No
EN	North America	USA			Male		44	35	81-100%	4:31-4:45	30	30	11-20	Awards,Keeping fit and healthy,Sense of accomplishment,Social life,Travel						Passive	8	50 US states,Abbot Marathon Majors 6 stars		Vegetarian (excludes fish, poultry, and meat)		Yes (positive test)	None		25	Yes	No	Yes	Yes	No	No	No		Stability		Heart Rate Variability,Max HR		Chafing,Muscle Pull		Compression,Foam Rolling,Ice (Ice packs or cold compresses),Rest,Stretching		Physiotherapist,Another Medical Professional (e.g. Physician, A&E)		No	No
EN	North America	United States			Female		26	21	0-20%	4:46-5:00	21	21	0-10	Continuous performance improvement,It is a way of life,Keeping fit and healthy,Travel						Detractor	1	None of these		Regular (including foods from all food groups)		Probably yes (no positive test)	Shortness of breath,Unusual fatigue		16	No	No	No	Yes	No	No	No		Cushioned		Calories,Heart Rate Variability,Resting HR,Sleep		Blisters,Chafing,IT Band Syndrome		RICE (Rest Ice Compression Elevation)		No I do not seek professional advise for running injuries		No	No
EN	North America	United States of America			Female		36	28	0-20%	4:16-4:30	26	27	0-10	Awards,Competition,Sense of accomplishment,To reach certain milestones,Total numbers						Promoter	9	50 US states		Regular (including foods from all food groups)		Yes (positive test)	None		39	Yes	Yes	No	Yes	No	No	No		Cushioned,Motion Control (made to support heavy weight, flat feet or severe overpronation)		Calories,Floors,Sleep,Steps		Blisters,Chafing,Hip Injury,Muscle Pull,Shin Splints		Foam Rolling,Rest,Stretching		Physiotherapist,Another Medical Professional (e.g. Physician, A&E)		Yes	No
EN	North America	United States			Female		67	44	81-100%	4:46-5:00	52	52	0-10	It is a way of life,Keeping fit and healthy,Sense of accomplishment,Social life,To reach certain milestones,Travel						Promoter	10	50 US states,Marathon Maniacs		Regular (including foods from all food groups)		Yes (positive test)	None		50	Yes	Yes	Yes	Yes	No	No	No		Light weight		Heart Rate Variability,Intensity minutes,Max HR,VO2MAX		Heat Exhaustion,IT Band Syndrome,Knee Injury,Morton's Neuroma,Stress Fracture		Compression,Elevation,Ice (Ice packs or cold compresses)		Physiotherapist		No	No
EN	North America	United States			Male		54	40	81-100%	3:31-3:45	38	38	0-10	It is a way of life,Keeping fit and healthy,Sense of accomplishment,To reach certain milestones,Travel						Detractor	2	50 US states		Regular (including foods from all food groups)		Yes (positive test)	None		25	No	No	No	Yes	Yes	No		No	Cushioned		Calories		Blisters,Chafing,Calf Injury,IT Band Syndrome,Stress Fracture		Compression,Foam Rolling,Rest		Physiotherapist		Yes	No
EN	North America	USA			Female		54	25	0-20%	3:46-4:00	44	45	0-10	Competition,Keeping fit and healthy,Sense of accomplishment,Social life,To reach certain milestones,Total numbers,Travel						Detractor	1	50 US states,Abbot Marathon Majors 6 stars		Regular (including foods from all food groups)		Yes (positive test)	None		70	No	Yes	Yes	Yes	No	Yes	Yes		Cushioned,Stability,Light weight		Heart Rate Variability,Intensity minutes,Max HR,Resting HR,Sleep,Stress,VO2MAX		Ankle Injury,Blisters,Chafing,Calf Injury,Heat Exhaustion,Hip Injury,IT Band Syndrome,Muscle Pull,Stress Fracture		Foam Rolling,Pain Relief,Rest,Stretching,Other - Please Specify	Massage by massage gun or masseur	Physiotherapist,Specialist or other- Please detail here:	Orthopedist for more persistent injuries	No	No
EN	Europe		England		Male		31	434	41-60%	2:46-3:00	22	23	41-50	Awards,Keeping fit and healthy,Sense of accomplishment,To reach certain milestones				Promoter	10	Detractor	4	100 Marathon club UK milestones,World Mega Marathon ranking 300+,Other - Please specify	Guinness World Records	Other (Please specify)	No diet	Yes (positive test)	None		60	No	No	No	Yes	Yes	No	No	No	Cushioned		None		Blisters,Tendonitus (Achilles tendinopathy)		Pain Relief,Rest,RICE (Rest Ice Compression Elevation)		Physiotherapist,Another Medical Professional (e.g. Physician, A&E)		No	No
EN	Europe		England		Female		43	11	41-60%	4:16-4:30	41	41	0-10	Continuous performance improvement,It is a way of life,Keeping fit and healthy,Sense of accomplishment,Social life,To reach certain milestones						Detractor	6	None of these		Regular (including foods from all food groups)		Yes (positive test)	Elevated Heart rate,Unusual fatigue		45	No	No	Yes	Yes	Yes	No	No	Yes	Cushioned		Calories,Steps		Ankle Injury,Blisters,Chafing,Calf Injury,Shin Splints		Compression,Foam Rolling,Ice (Ice packs or cold compresses),Pain Relief,Rest,RICE (Rest Ice Compression Elevation),Stretching,Other - Please Specify	Sports massage	Physiotherapist		No	No
EN	Europe		England		Male		55	334	81-100%	3:16-3:30	32	32	11-20	Continuous performance improvement,Keeping fit and healthy,Sense of accomplishment,To reach certain milestones,Travel				Passive	7	Detractor	6	100 Marathon club UK milestones		Regular (including foods from all food groups)		Yes (positive test)	Other (Please specify)	General drop in overall fitness compared to pre-covid	80	No	No	Yes	Yes	No	No	Yes		Cushioned,Stability		Calories,Heart Rate Variability,Resting HR,Sleep,Steps,VO2MAX		Ankle Injury,Blisters,Chafing,Shin Splints		Foam Rolling,Rest,RICE (Rest Ice Compression Elevation),Other - Please Specify	Treatment by physio	Physiotherapist		No	No
EN	Europe		England		Female		52	75	0-20%	4:31-4:45	48	49	21-30	Keeping fit and healthy,Running streaks,Sense of accomplishment,To reach certain milestones						Detractor	3	None of these		Other (Please specify)	I am autistic and eat a very beige diet	Yes (positive test)	None		80	No	No	Yes	Yes	Yes	No		Yes	Other - Please specify	Zero drop	Resting HR		Chafing		None		No I do not seek professional advise for running injuries		No	No
EN	North America	United States Iowa			Female		50	42	81-100%	4:46-5:00	38	37	0-10	Competition,It is a way of life,Keeping fit and healthy,Social life,To reach certain milestones,Travel						Detractor	5	50 US states		Regular (including foods from all food groups)		Yes (positive test)	Forced to stop running for a period,Muscle aches,Shortness of breath,Unusual fatigue		50	No	Yes	No	Yes	No	No			Cushioned		Calories,Steps,VO2MAX		Ankle Injury,Chafing,Hip Injury,IT Band Syndrome,Plantar Fasciitis,Runners Knee,Tendonitus (Achilles tendinopathy)		Accupuncture,Foam Rolling,Stretching,Other - Please Specify	Active Release Technique	Specialist or other- Please detail here:	Chiropractor and Accupuncturist	No	No
EN	North America	USA			Male		60	29	0-20%	4:16-4:30	38	40	0-10	It is a way of life,Keeping fit and healthy,Running streaks,Sense of accomplishment,To reach certain milestones,Travel,Others - Please specify	As a Type 1 Diabetic, Running and training for marathons helps maintain my long term glucose					Detractor	0	7 continents,50 US states,Global Marathon challenges		Vegetarian (excludes fish, poultry, and meat)		No			50	Yes	No	Yes	Yes	No	No	No		Stability		Heart Rate Variability,Max HR,Resting HR,Sleep,VO2MAX		IT Band Syndrome,Morton's Neuroma,Plantar Fasciitis,Shin Splints,Tendonitus (Achilles tendinopathy)		Compression,Elevation,Foam Rolling,Rest,Stretching		Another Medical Professional (e.g. Physician, A&E)		No	No
EN	North America	USA			Male		46	34	81-100%	2:46-3:00	35	39	0-10	Awards,Competition,Continuous performance improvement,It is a way of life,Keeping fit and healthy,Social life,To reach certain milestones						Detractor	2	Abbot Marathon Majors 6 stars		Other (Please specify)	Lchf	Yes (positive test)	None		85	Yes	No	No	Yes	Yes	Yes	No	Yes	Cushioned		Heart Rate Variability,Intensity minutes,Max HR,VO2MAX		Tendonitus (Achilles tendinopathy)		Other - Please Specify	Massage	Physiotherapist,Specialist or other- Please detail here:	Chiropractor and massage	No	No
EN	North America	The United States of America			Male		57	56	81-100%	2:46-3:00	31	32	0-10	Awards,Competition,Keeping fit and healthy,Sense of accomplishment,Social life,To reach certain milestones,Travel						Promoter	9	50 US states,Abbot Marathon Majors 6 stars,Marathon Maniacs,Other - Please specify	50 States sub 4	Regular (including foods from all food groups)		No			120	No	No	Yes	Yes	Yes	No		No	Cushioned		Calories,Intensity minutes,Max HR,VO2MAX		Ankle Injury,Chafing,Calf Injury,Hip Injury,IT Band Syndrome,Plantar Fasciitis,Runners Knee,Tendonitus (Achilles tendinopathy)		Foam Rolling,Other - Please Specify	Specific weighted drills	Physiotherapist		No	No
EN	Europe		England		Female		56	379	81-100%	3:31-3:45	25	25	21-30	Keeping fit and healthy,Sense of accomplishment,Social life,Travel				Detractor	6	Detractor	6	100 Marathon club UK milestones		Pesco-vegetarian (includes fish)		Yes (positive test)	Muscle aches,Unusual fatigue		60	No	No	Yes	No	No				Motion Control (made to support heavy weight, flat feet or severe overpronation)		Calories		Ankle Injury,Blisters,Chafing,IT Band Syndrome,Stress Fracture		Accupuncture		Physiotherapist		Yes	No
EN	North America	United States			Female		42	4	81-100%	5:01-5:15	40	40	0-10	It is a way of life,Keeping fit and healthy,Sense of accomplishment,Social life						Detractor	5	None of these		Other (Please specify)	I do not limit my diet, rather I eat what feels good and fuels me well. I do not eat any dairy or gluten, rarely chicken and pork, occasionally beef, mostly seafood, turkey, vegetables.	Yes (positive test)	None		65	Yes	Yes	No	Yes	Yes	No	No	Yes	Cushioned,Stability		Sleep,Other - Please Specify	I mostly track my menstrual symptoms .ore than any other stat	Blisters,Chafing,Heat Exhaustion,Hip Injury,Shin Splints,Stress Fracture,Other - Please specify	Strained glute, tight psoas (to the point where I couldn't walk correctly)	Compression,Foam Rolling,Rest,Stretching,Other - Please Specify	Chiropractic work and restorative yoga	Specialist or other- Please detail here:	Physical therapy and chiropractic	No	No
EN	North America	United States			Female		61	50	0-20%	4:46-5:00	47	48	0-10	It is a way of life						Passive	8	None of these		Regular (including foods from all food groups)		Yes (positive test)	None		200	Yes	Yes	No	Yes	Yes	No		No	Cushioned		Heart Rate Variability,Floors,Intensity minutes,Max HR,Pulse Ox,Respiration,Resting HR,Steps,Stress,VO2MAX		Ankle Injury,Blisters,Chafing,Calf Injury,Heat Exhaustion,IT Band Syndrome,Plantar Fasciitis,Runners Knee,Shin Splints,Tendonitus (Achilles tendinopathy)		Elevation,Foam Rolling,Ice (Ice packs or cold compresses),Pain Relief,Rest,RICE (Rest Ice Compression Elevation),Stretching,Other - Please Specify	Massage	Another Medical Professional (e.g. Physician, A&E)		No	Yes
EN	North America	Usa			Male		64	12	81-100%	4:16-4:30	27	27	0-10	Keeping fit and healthy,Sense of accomplishment,To reach certain milestones,Travel						Detractor	2	None of these		Regular (including foods from all food groups)		No			50	No	Yes	No	Yes	Yes	No	No	No	Cushioned,Stability		Intensity minutes,Resting HR,Sleep,Steps		Ankle Injury,Blisters,Chafing,Heat Exhaustion,Knee Injury,Muscle Pull,Plantar Fasciitis,Shin Splints		Compression,Elevation,Pain Relief,Rest		No I do not seek professional advise for running injuries		Yes	No
EN	North America	United States			Male		46	20	0-20%	3:16-3:30	44	44	11-20	Continuous performance improvement,It is a way of life,Keeping fit and healthy,Sense of accomplishment,To reach certain milestones						Detractor	0	None of these		Vegetarian (excludes fish, poultry, and meat)		No			60	No	Yes	No	Yes	No	Yes	No		Other - Please specify	Firm for training, light weight for road, cushioned for trail	Heart Rate Variability,Pulse Ox,Resting HR,Sleep,Steps,Stress,VO2MAX		Ankle Injury,Blisters,Chafing,Frostbite,IT Band Syndrome,Knee Injury,Runners Knee		Pain Relief,RICE (Rest Ice Compression Elevation),Stretching		No I do not seek professional advise for running injuries		No	No
EN	Europe		Republic of Ireland		Male		42	8	81-100%	3:46-4:00	29	30	0-10	Keeping fit and healthy,Sense of accomplishment,To reach certain milestones						Detractor	2	MCI Ireland club milestones		Regular (including foods from all food groups)		Yes (positive test)	None		35	No	No	No	Yes	Yes	No		No	Stability		Max HR,Resting HR,Sleep,Steps		Chafing,Muscle Pull		Pain Relief,Rest		Physiotherapist		No	No
EN	North America	Canada			Female		47	20	21-40%	3:16-3:30	45	40	0-10	Awards,Competition,Continuous performance improvement,It is a way of life						Promoter	9	Abbot Marathon Majors 6 stars		Other (Please specify)	Usually not, sometimes low carb	Yes (positive test)	None		80	Yes	No	No	Yes	Yes	Yes	Yes	Yes	Cushioned,Light weight		Calories,Heart Rate Variability,Resting HR,Sleep,Stress,VO2MAX		Ankle Injury,Blisters,Chafing,Hip Injury,IT Band Syndrome,Runners Knee,Shin Splints,Other - Please specify	proximal hamstring tendonopathy	Compression,Elevation,Foam Rolling,Pain Relief,Rest,Stretching,Other - Please Specify	physiotherapy, massage gun, massage, scraper, compression boots	Physiotherapist,Another Medical Professional (e.g. Physician, A&E)		Yes	No
EN	North America	United States			Male		61	200	0-20%	3:31-3:45	37	38	11-20	It is a way of life,Keeping fit and healthy,Multi Marahon Series (e.g. 10 in 10 days),To reach certain milestones,Travel,Others - Please specify	Stoopid Crazy I have no idea.	Other - Please specify	9 in 9	Detractor	5	Passive	8	50 US states,100 Marathons from your national club,Abbot Marathon Majors 6 stars,Marathon Maniacs,Other - Please specify	50 States &lt;4	Regular (including foods from all food groups)		No			80	No	No	No	Yes	No	No	Yes		Stability		None		Blisters,Chafing,Muscle Pull,Other - Please specify	Compartment Syndrome Rahbadomlysis	Pain Relief,Surgery		Another Medical Professional (e.g. Physician, A&E),Specialist or other- Please detail here:	Orthopedic Surgeon	No	No
EN	Europe		England		Male		54	150	61-80%	3:31-3:45	48	49	21-30	Keeping fit and healthy,Sense of accomplishment,Social life,To reach certain milestones				Promoter	10	Passive	7	100 Marathons from your national club		Regular (including foods from all food groups)		Yes (positive test)	None		80	No	No	No	Yes	Yes	No	No	Yes	Cushioned		Calories,Sleep,Steps		IT Band Syndrome,Muscle Pull,Plantar Fasciitis		Support strapping,Stretching		No I do not seek professional advise for running injuries		No	No
EN	Europe		Republic of Ireland		Female		51	108	61-80%	4:01-4:15	42	44	11-20	Keeping fit and healthy,To reach certain milestones				Promoter	10	Detractor	5	MCI Ireland club milestones		Regular (including foods from all food groups)		Yes (positive test)	None		70	No	Yes	No	Yes	Yes	No	No	Yes	Stability		Max HR		Ankle Injury,Blisters,Chafing,Heat Exhaustion,Muscle Pull,Plantar Fasciitis,Shin Splints,Tendonitus (Achilles tendinopathy)		Accupuncture,RICE (Rest Ice Compression Elevation),Support strapping,Stretching		Physiotherapist		Yes	No
EN	Europe		Republic of Ireland		Male		51	119	81-100%	3:01-3:15	41	42	21-30	Continuous performance improvement				Promoter	10	Passive	7	100 Marathons from your national club,Atlas 100-mile club milestones		Regular (including foods from all food groups)		Yes (positive test)	None		70	Yes	Yes	Yes	Yes	No	No	No		Stability		Intensity minutes,Max HR		Blisters,Plantar Fasciitis,Runners Knee		Accupuncture,Foam Rolling,Ice (Ice packs or cold compresses),RICE (Rest Ice Compression Elevation),Stretching		Physiotherapist		No	No
EN	North America	USA			Male		56	51	41-60%	3:31-3:45	21	21	0-10	Continuous performance improvement,Keeping fit and healthy,Running streaks,Sense of accomplishment,To reach certain milestones,Others - Please specify	Set big goals in terms of what isn’t readily achievable					Detractor	0	None of these		Regular (including foods from all food groups)		Probably yes (no positive test)	None		40	No	No	Yes	Yes	Yes	No	No	No	Other - Please specify	Trail	Floors,Pulse Ox,Resting HR,Sleep,Steps		Ankle Injury,Blisters,Chafing,Calf Injury,Frostbite,Heat Exhaustion,Hip Injury,Hypothermia,Knee Injury,Muscle Pull,Plantar Fasciitis,Shin Splints,Stress Fracture		Compression,Pain Relief,Rest		No I do not seek professional advise for running injuries		Yes	No
EN	North America	USA			Male		29	53	0-20%	3:01-3:15	24	25	11-20	Continuous performance improvement,Keeping fit and healthy,Sense of accomplishment,Social life,Travel						Detractor	5	None of these		Regular (including foods from all food groups)		Yes (positive test)	None		100	No	No	No	Yes	No	Yes	No		Cushioned		Heart Rate Variability,Intensity minutes,Resting HR,Sleep,Stress		Ankle Injury,Blisters,Chafing,Heat Exhaustion,IT Band Syndrome,Knee Injury,Runners Knee,Tendonitus (Achilles tendinopathy)		Rest,RICE (Rest Ice Compression Elevation),Other - Please Specify	Active rehab/ strengthening exercises + chiro	Another Medical Professional (e.g. Physician, A&E)		Yes	Yes
EN	Europe		England		Female		44	155	81-100%	3:46-4:00	35	35	0-10	Social life				Passive	7	Passive	7	Global Marathon challenges,Mega Marathons		Regular (including foods from all food groups)		Probably yes (no positive test)	Muscle aches,Shortness of breath		80	Yes	No	No	Yes	Yes	No	No	Yes	Stability		Calories,Steps		Blisters,Chafing,Calf Injury		Compression,Other - Please Specify	Regular sports massage	Physiotherapist,Specialist or other- Please detail here:	Sports massage therapist	No	No
EN	Europe		England		Female		44	78	0-20%	3:31-3:45	23	25	11-20	It is a way of life,Keeping fit and healthy,Sense of accomplishment,To reach certain milestones,Total numbers,Travel						Detractor	1	100 Marathon club UK milestones,Abbot Marathon Majors 6 stars		Regular (including foods from all food groups)		Yes (positive test)	Forced to stop running for a period,Unusual fatigue		65	No	No	No	Yes	Yes	No	No	No	Cushioned,Stability		Calories,Heart Rate Variability,Resting HR,Sleep,Steps,VO2MAX		Ankle Injury,Blisters,Chafing,Calf Injury,Hip Injury,Knee Injury,Muscle Pull,Plantar Fasciitis,Shin Splints		Elevation,Foam Rolling,Ice (Ice packs or cold compresses),Pain Relief,Rest,RICE (Rest Ice Compression Elevation),Stretching		Physiotherapist		No	No
EN	North America	USA			Female		50	37	41-60%	3:31-3:45	42	45	11-20	Awards,Continuous performance improvement,It is a way of life,Keeping fit and healthy,Multi Marahon Series (e.g. 10 in 10 days),Sense of accomplishment,Social life,To reach certain milestones,Total numbers,Travel		12 in 12 months,Back to Back				Detractor	4	50 US states,Abbot Marathon Majors 6 stars,Marathon Maniacs		Vegetarian (excludes fish, poultry, and meat)		No			40	No	No	No	Yes	No	Yes	No		Light weight		Calories,Heart Rate Variability,Max HR,Pulse Ox,Respiration,Resting HR,Sleep,Steps,VO2MAX		Ankle Injury,Chafing		Foam Rolling,Rest,Stretching		Specialist or other- Please detail here:	Depends. Have and have not	No	No
EN	Europe		Republic of Ireland		Male		50	20	81-100%	3:16-3:30	39	41	0-10	It is a way of life,Keeping fit and healthy,Sense of accomplishment,Social life,To reach certain milestones,Total numbers						Detractor	0	None of these		Regular (including foods from all food groups)		No			40	No	Yes	Yes	Yes	Yes	No	No	No	Light weight		Max HR,Resting HR,Steps		Ankle Injury,Calf Injury,IT Band Syndrome,Muscle Pull,Plantar Fasciitis,Runners Knee		Foam Rolling,Ice (Ice packs or cold compresses),Rest,RICE (Rest Ice Compression Elevation),Stretching		Physiotherapist		No	No
EN	Europe		Republic of Ireland		Male		40	258	81-100%	3:46-4:00	36	35	41-50	Keeping fit and healthy,Social life				Promoter	10	Detractor	4	MCI Ireland club milestones		Prefer not to say		No			85	No	No	No	Yes	No	No	No		Cushioned		Steps		IT Band Syndrome		Accupuncture,Other - Please Specify	Using message gun	Physiotherapist		Yes	No
EN	Europe		Republic of Ireland		Female		43	84	0-20%	4:46-5:00	38	34	11-20	Keeping fit and healthy,Sense of accomplishment,To reach certain milestones,Travel						Detractor	5	Abbot Marathon Majors 6 stars,MCI Ireland club milestones		Vegan		Yes (positive test)	None		8	No	No	No	Yes	No	No	No		Stability		None		Other - Please specify	Loss of toe nails.	Rest		Physiotherapist		No	No
EN	Europe		Republic of Ireland		Male		41	111	81-100%	3:01-3:15	29	29	11-20	Competition,Continuous performance improvement,It is a way of life,Total numbers				Passive	7	Passive	7	Abbot Marathon Majors 6 stars,MCI Ireland club milestones		Other (Please specify)	All you can eat!	Yes (positive test)	None		60	No	No	No	Yes	Yes	No	Yes	Yes	Stability		Heart Rate Variability,Resting HR,Sleep		Ankle Injury,Chafing,Calf Injury,Muscle Pull,Tendonitus (Achilles tendinopathy)		Compression,Elevation,Ice (Ice packs or cold compresses),RICE (Rest Ice Compression Elevation)		Physiotherapist		Yes	No
EN	Europe		Republic of Ireland		Male		48	176	81-100%	2:46-3:00	37	40	11-20	Competition,Keeping fit and healthy,Sense of accomplishment,To reach certain milestones				Passive	7			100 Marathons from your national club,MCI Ireland club milestones		Vegetarian (excludes fish, poultry, and meat)		Yes (positive test)	None		60	No	No	No	Yes	Yes	No	No	Yes	Stability		Resting HR,Steps		Chafing,Calf Injury,Hip Injury,IT Band Syndrome,Knee Injury		Accupuncture,Foam Rolling,Pain Relief,RICE (Rest Ice Compression Elevation)		Physiotherapist		Yes	No
EN	Europe		Republic of Ireland		Male		36	8	81-100%	2:46-3:00	28	28	0-10	Continuous performance improvement,It is a way of life,Keeping fit and healthy,Running streaks,Sense of accomplishment,To reach certain milestones						Detractor	0	None of these		Regular (including foods from all food groups)		Yes (positive test)	None		60	Yes	Yes	Yes	Yes	No	No	Yes		Light weight		Resting HR,Sleep,VO2MAX		Morton's Neuroma,Tendonitus (Achilles tendinopathy)		Accupuncture,Compression,Foam Rolling,Ice (Ice packs or cold compresses),RICE (Rest Ice Compression Elevation),Stretching,Surgery		Physiotherapist		No	No
EN	Europe		Republic of Ireland		Male		52	69	81-100%	2:46-3:00	30	30	11-20	Sense of accomplishment,To reach certain milestones,Travel						Detractor	2	MCI Ireland club milestones		Prefer not to say		Yes (positive test)	Forced to stop running for a period,Muscle aches,Shortness of breath		50	No	No	Yes	Yes	No	No			Stability		None		Calf Injury,Hip Injury,Muscle Pull,Runners Knee		Rest		Physiotherapist		No	No
EN	Europe		England		Male		48	748	0-20%	3:16-3:30	39	39	>51	It is a way of life				Detractor	0			None of these		Regular (including foods from all food groups)		Probably yes (no positive test)	None		126.6	No	No	Yes	No	No				Other - Please specify	Cheapest, I run so much they wear out quickly.	None		IT Band Syndrome		None		No I do not seek professional advise for running injuries		No	No
EN	Europe		England		Male		45	214	61-80%	3:46-4:00	39	39	0-10	It is a way of life,Keeping fit and healthy,Sense of accomplishment,Social life,To reach certain milestones				Passive	8	Passive	8	100 Marathons from your national club,Global Marathon challenges,Mega Marathons		Regular (including foods from all food groups)		Yes (positive test)	Unusual fatigue		50	No	No	No	Yes	Yes	No	No	Yes	Motion Control (made to support heavy weight, flat feet or severe overpronation)		Calories,Heart Rate Variability,Resting HR,Steps,Stress,VO2MAX		Blisters,Chafing,Calf Injury,Knee Injury,Plantar Fasciitis,Shin Splints,Tendonitus (Achilles tendinopathy)		Ice (Ice packs or cold compresses),Pain Relief,Support strapping		Physiotherapist		Yes	No
EN	Europe		Other European Country	Switzerland	Male		48	45	81-100%	3:31-3:45	36	39	41-50	It is a way of life,Keeping fit and healthy,Travel						Passive	7	100 Marathons from your national club,Abbot Marathon Majors 6 stars,Marathon Maniacs,Other - Please specify	777	Other (Please specify)	Normal	Yes (positive test)	None		50	Yes	No	No	Yes	No	Yes	No		Other - Please specify	Running Shoe	Heart Rate Variability,Intensity minutes,Steps,VO2MAX		Chafing,Calf Injury,Knee Injury,Muscle Pull		Foam Rolling,Rest,Stretching,Other - Please Specify	Dry Needling	Physiotherapist		No	Yes
EN	Europe		England		Female		45	116	81-100%	4:31-4:45	31	35	11-20	Sense of accomplishment				Passive	8	Detractor	2	Global Marathon challenges,Mega Marathons		Regular (including foods from all food groups)		Yes (positive test)	Forced to stop running for a period,Shortness of breath,Unusual fatigue		20	No	No	No	Yes	Yes	No	No	No	Cushioned		Calories,Floors,Sleep,Steps,Stress		Ankle Injury,Blisters,Knee Injury,Tendonitus (Achilles tendinopathy)		Ice (Ice packs or cold compresses),Pain Relief,RICE (Rest Ice Compression Elevation)		Physiotherapist		Yes	No
EN	Europe		England		Female		39	39	81-100%	3:46-4:00	34	34	11-20	It is a way of life,Sense of accomplishment,Social life,To reach certain milestones,Total numbers						Detractor	6	None of these		Regular (including foods from all food groups)		Probably yes (no positive test)	Elevated Heart rate		40	No	No	Yes	Yes	No	No			Other - Please specify	Just regular Pegasus	Floors,Intensity minutes,Resting HR,Sleep,Steps,VO2MAX		Blisters,Chafing,Heat Exhaustion		Foam Rolling,Support strapping,Stretching		Physiotherapist		Yes	No
EN	Europe		England		Female		53	257	0-20%	4:31-4:45	39	39	>51	Keeping fit and healthy,Others - Please specify	Because I enjoy doing them			Detractor	0	Detractor	0	Global Marathon challenges		Vegetarian (excludes fish, poultry, and meat)		Yes (positive test)	Shortness of breath,Unusual fatigue		80	No	No	No	Yes	Yes	No	No	No	Cushioned		Calories,Heart Rate Variability,Max HR,VO2MAX		Ankle Injury,Blisters,Chafing,Calf Injury,Hypothermia,Knee Injury,Plantar Fasciitis		Compression,Elevation,Foam Rolling,Ice (Ice packs or cold compresses),Pain Relief,Other - Please Specify	Taping	No I do not seek professional advise for running injuries		Yes	No
EN	Europe		England		Female		53	289	81-100%	3:46-4:00	47	47	>51	It is a way of life,Keeping fit and healthy,Multi Marahon Series (e.g. 10 in 10 days),Sense of accomplishment,Social life,To reach certain milestones		10 in 10 days,12 in 12 months,52 in 52 weeks,100 in 100 weeks,Back to Back		Promoter	10			100 Marathon club UK milestones,Global Marathon challenges,Mega Marathons		Regular (including foods from all food groups)		Yes (positive test)	None		90	No	No	No	Yes	Yes	No	No	No	Cushioned		Steps		None		Foam Rolling,Stretching		No I do not seek professional advise for running injuries		No	No
EN	Europe		Republic of Ireland		Female		55	74	61-80%	3:46-4:00	30	31	0-10	Competition,It is a way of life,Keeping fit and healthy,Sense of accomplishment,Social life,Travel						Passive	8	MCI Ireland club milestones		Regular (including foods from all food groups)		Yes (positive test)	Heart Palpitations,Shortness of breath		40	Yes	No	Yes	Yes	No	Yes	Yes		Stability		Heart Rate Variability,Max HR,Steps		Blisters,Chafing,IT Band Syndrome,Knee Injury,Muscle Pull,Runners Knee,Tendonitus (Achilles tendinopathy)		Compression,Elevation,Pain Relief,Stretching		Physiotherapist,Specialist or other- Please detail here:	Physical therapists	Yes	No
EN	Europe		England		Female		62	81	81-100%	4:16-4:30	56	56	11-20	Keeping fit and healthy,Sense of accomplishment,To reach certain milestones,Travel						Detractor	6	50 US states,100 Marathon club UK milestones,Abbot Marathon Majors 6 stars,Marathon Maniacs		Vegetarian (excludes fish, poultry, and meat)		No			40	Yes	No	Yes	Yes	Yes	No	No	Yes	Light weight		Calories		Ankle Injury,Blisters,Calf Injury		Elevation,Ice (Ice packs or cold compresses),Rest		Physiotherapist		No	No
EN	Europe		England		Female		49	186	0-20%	4:16-4:30	37	37	21-30	Others - Please specify	Mental health			Promoter	9	Detractor	0	100 Marathon club UK milestones		Regular (including foods from all food groups)		No			40	No	No	No	Yes	No	No	No		Cushioned,Stability		None		Blisters,IT Band Syndrome		Rest,Support strapping		Specialist or other- Please detail here:	Chiropractor	Yes	No
EN	Europe		Other European Country	Switzerland	Female		55	56	81-100%	3:46-4:00	42	42	11-20	It is a way of life,Multi Marahon Series (e.g. 10 in 10 days),Sense of accomplishment,To reach certain milestones,Travel		12 in 12 months,Back to Back,Other - Please specify	7 in 7			Detractor	0	100 Marathons from your national club,Abbot Marathon Majors 6 stars,Global Marathon challenges,Marathon Maniacs		Other (Please specify)	No, normal diet	No			60	Yes	No	No	Yes	Yes	No	No	No	Other - Please specify	Standard shoes with no compensating support	Floors,Sleep,Steps,VO2MAX		Blisters,Chafing,Calf Injury,Hip Injury,IT Band Syndrome,Knee Injury,Plantar Fasciitis,Shin Splints,Stress Fracture,Tendonitus (Achilles tendinopathy)		Accupuncture,Stretching,Other - Please Specify	Physio	Physiotherapist		No	No
EN	Europe		England		Female		48	66	61-80%	3:46-4:00	41	42	11-20	Awards,It is a way of life,Keeping fit and healthy,Sense of accomplishment,Social life,To reach certain milestones,Travel						Passive	7	100 Marathon club UK milestones		Regular (including foods from all food groups)		Yes (positive test)	None		50	No	No	Yes	Yes	Yes	No		Yes	Cushioned		Calories,Steps,VO2MAX		Blisters,Calf Injury,Hip Injury,IT Band Syndrome,Shin Splints		Rest,Support strapping,Other - Please Specify	Sports massage	Specialist or other- Please detail here:	Sports therapist	No	Yes
EN
EN	Europe		England		Female		34	132	81-100%	3:46-4:00	23	23	>51	Continuous performance improvement,It is a way of life,Keeping fit and healthy,Multi Marahon Series (e.g. 10 in 10 days),Travel		10 in 10 days,52 in 52 weeks,Back to Back		Promoter	9	Detractor	2	100 Marathon club UK milestones,Global Marathon challenges		Regular (including foods from all food groups)		No			100	No	No	Yes	Yes	Yes	No	No	No	Stability,Light weight		Calories,Resting HR,Steps		None		None		No I do not seek professional advise for running injuries		No	No
EN	Europe		Wales		Male		45	40	0-20%	4:16-4:30	40	40	11-20	Continuous performance improvement,Keeping fit and healthy,Sense of accomplishment,Social life,To reach certain milestones,Travel						Detractor	4	Global Marathon challenges		Prefer not to say		No			55	No	No	No	Yes	No	No	No		Cushioned		Heart Rate Variability,VO2MAX		None		Rest,Stretching		No I do not seek professional advise for running injuries		No	No
EN	Australia/Oceania	Australia			Female		69	322	81-100%	3:46-4:00	48	48	31-40	It is a way of life,Keeping fit and healthy,Multi Marahon Series (e.g. 10 in 10 days),Sense of accomplishment,Social life,To reach certain milestones,Travel		5 in 5 days,10 in 10 days,Back to Back		Promoter	10	Detractor	0	50 US states,100 Marathons from your national club,Abbot Marathon Majors 6 stars,Global Marathon challenges,Marathon Globetrotters,Marathon Maniacs,Mega Marathons,World Mega Marathon ranking 300+		Regular (including foods from all food groups)		Yes (positive test)	None		30	Yes	Yes	Yes	Yes	Yes	No	No	No	Cushioned		Heart Rate Variability,Intensity minutes,Max HR,Resting HR,Sleep,VO2MAX		Blisters,Chafing,IT Band Syndrome		Compression,Elevation,Foam Rolling,Ice (Ice packs or cold compresses),Stretching		Physiotherapist		Yes	No
EN	Australia/Oceania	Australia			Male		74	160	81-100%	3:16-3:30	40	41	0-10	Continuous performance improvement,It is a way of life,Keeping fit and healthy,Sense of accomplishment,To reach certain milestones				Promoter	10	Detractor	5	100 Marathons from your national club		Regular (including foods from all food groups)		Yes (positive test)	Forced to stop running for a period,Shortness of breath,Unusual fatigue		40	No	Yes	No	Yes	No	No	No		Other - Please specify	Cheap and comfortable	Max HR,Pulse Ox,Resting HR,VO2MAX		Ankle Injury,Blisters,Chafing,Calf Injury,Muscle Pull,Morton's Neuroma,Other - Please specify	High Altitude sickness Shoulder injury after fall Smashed face after fall	Pain Relief,Surgery		Specialist or other- Please detail here:	Orthopaedic surgeon Mostly self treat minor injuries	No	Yes
EN	Europe		England		Female		29	66	81-100%	3:31-3:45	24	24	11-20	Sense of accomplishment,Social life,To reach certain milestones						Detractor	0	100 Marathon club UK milestones		Regular (including foods from all food groups)		No			70	No	No	No	Yes	No
EN	Europe		England		Female		69	119	81-100%	5:16-5:30	62	62	0-10	Sense of accomplishment,Social life,To reach certain milestones				Promoter	10	Promoter	10	100 Marathon club UK milestones		Regular (including foods from all food groups)		No
EN	Europe		Republic of Ireland		Male		47	556	81-100%	3:16-3:30	40	41	31-40	Competition				Passive	8			Abbot Marathon Majors 6 stars,Triple crown of Ultras (Comrades, Western States, UTMB)		Regular (including foods from all food groups)		No
EN	Europe		Republic of Ireland		Male		48	20	0-20%	4:16-4:30	40	40	0-10	Keeping fit and healthy
EN	South America	Brazil			Male		61	9	81-100%	3:31-3:45	47	51	0-10	Continuous performance improvement,Keeping fit and healthy,Sense of accomplishment
EN	Europe		England		Female		42	80	41-60%	5:01-5:15	17	34	0-10	It is a way of life						Detractor	0	Other - Please specify	Ldwa	Regular (including foods from all food groups)		Yes (positive test)	Shortness of breath		50	No	No	Yes	Yes	Yes	Yes	No	No	Cushioned		Calories,Resting HR,Sleep,Stress		Ankle Injury,Blisters,Chafing,Heat Exhaustion,Hypothermia,IT Band Syndrome		Foam Rolling,RICE (Rest Ice Compression Elevation),Stretching		Physiotherapist		No	No
EN	Europe		England		Female		59	160	0-20%	4:46-5:00	52	54	41-50	Continuous performance improvement,It is a way of life,Keeping fit and healthy,Sense of accomplishment,Social life,To reach certain milestones,Total numbers				Promoter	10			100 Marathon club UK milestones,Global Marathon challenges,Marathon Maniacs,Mega Marathons		Pesco-vegetarian (includes fish)		Yes (positive test)	None		60	Yes	No	Yes	Yes	No	No	No		Motion Control (made to support heavy weight, flat feet or severe overpronation)		Calories,Heart Rate Variability,Max HR,Pulse Ox,Respiration,Resting HR,Sleep,Steps,Stress,VO2MAX		Ankle Injury,Blisters,IT Band Syndrome,Plantar Fasciitis,Shin Splints		None		Physiotherapist		Yes	No
EN	Australia/Oceania	Papua New Guinea			Male		66	199	81-100%	3:16-3:30	24	24	0-10	It is a way of life,Keeping fit and healthy,Sense of accomplishment						Passive	7	100 Marathons from your national club		Regular (including foods from all food groups)		Yes (positive test)	None		25	No	Yes	No	Yes	No	No	No		Stability		Pulse Ox		Ankle Injury,Blisters,Tendonitus (Achilles tendinopathy)		Ice (Ice packs or cold compresses),Rest		Physiotherapist		No	Yes
EN	Europe		Other European Country	Slovakia	Male		80	126	81-100%	2:46-3:00	40	45	0-10	It is a way of life				Detractor	0			100 Marathons from your national club,Abbot Marathon Majors 6 stars		Regular (including foods from all food groups)		No			50	No	Yes	No	No	No				Cushioned		None		Calf Injury,Knee Injury,Plantar Fasciitis,Stress Fracture,Tendonitus (Achilles tendinopathy)		Compression,Rest,Stretching		No I do not seek professional advise for running injuries		No	No
EN	Europe		England		Female		47	104	81-100%	4:31-4:45	41	41	41-50	Others - Please specify	Challenge and mental health			Passive	8	Detractor	4	100 Marathon club UK milestones,Global Marathon challenges		Regular (including foods from all food groups)		Yes (positive test)	Shortness of breath,Unusual fatigue		80	No	No	No	Yes	Yes	No	Yes	Yes	Stability		Calories,Steps		Ankle Injury,Knee Injury,Muscle Pull,Plantar Fasciitis,Shin Splints		RICE (Rest Ice Compression Elevation),Support strapping,Other - Please Specify	Surgery for meniscus and osteoarthritis	Physiotherapist,Another Medical Professional (e.g. Physician, A&E),Specialist or other- Please detail here:	Surgery	Yes	No
EN	Europe		Other European Country	Finland	Female		56	835	81-100%	3:01-3:15	25	25	>51	It is a way of life,Multi Marahon Series (e.g. 10 in 10 days),Sense of accomplishment,Social life,To reach certain milestones,Total numbers		10 in 10 days,52 in 52 weeks,Other - Please specify	100 in 52 weeks	Promoter	9	Detractor	4	100 Marathons from your national club,World Mega Marathon ranking 300+		Regular (including foods from all food groups)		Probably yes (no positive test)	Unusual fatigue		84	No	No	Yes	No	No				Other - Please specify	Don't know, choose shoes that feel good & wear them until they decompose	None		Ankle Injury,Blisters,Chafing,Calf Injury,Frostbite,Heat Exhaustion,Hip Injury,IT Band Syndrome,Knee Injury,Plantar Fasciitis,Other - Please specify	At least these	Compression,Pain Relief		No I do not seek professional advise for running injuries		No	No
EN	Europe		England		Female		49	34	21-40%	4:31-4:45	42	42	0-10	Keeping fit and healthy,Sense of accomplishment,Social life,Travel						Passive	7	Global Marathon challenges,Other - Please specify	World Marathon Challenges	Pesco-vegetarian (includes fish)		Yes (positive test)	Forced to stop running for a period,Muscle aches,Shortness of breath,Unusual fatigue		40	No	Yes	Yes	Yes	Yes	No		No	Stability		Heart Rate Variability,Max HR,Resting HR,Sleep		Ankle Injury,Blisters,Chafing,Hip Injury,IT Band Syndrome,Knee Injury,Muscle Pull,Morton's Neuroma,Plantar Fasciitis,Runners Knee,Shin Splints		Compression,Foam Rolling,Ice (Ice packs or cold compresses),Pain Relief,Rest,Support strapping,Stretching		Physiotherapist		No	No
EN	Europe		Germany		Female		47	42	81-100%	3:46-4:00	39	42	0-10	It is a way of life,Keeping fit and healthy,Multi Marahon Series (e.g. 10 in 10 days),Sense of accomplishment,Social life		10 in 10 days,Back to Back				Passive	8	Global Marathon challenges,Marathon Maniacs,Mega Marathons		Regular (including foods from all food groups)		Yes (positive test)	None		65	Yes	No	Yes	Yes	No	No	No		Light weight		Floors,Intensity minutes,Max HR,Resting HR,Steps,VO2MAX		Blisters,Chafing,Plantar Fasciitis		Foam Rolling,Rest,Stretching		No I do not seek professional advise for running injuries		No	No
EN	Europe		Other European Country	Finland	Female		55	462	0-20%	3:46-4:00	39	39	>51	It is a way of life,Keeping fit and healthy,Multi Marahon Series (e.g. 10 in 10 days),Social life		10 in 10 days,Other - Please specify	6 in 6 day	Promoter	9	Detractor	0	100 Marathons from your national club		Pesco-vegetarian (includes fish)		No			70	No	No	No	Yes	No	No	No		Cushioned		Intensity minutes,Sleep		Blisters,Hip Injury		Rest,Stretching		Another Medical Professional (e.g. Physician, A&E)		No	No
EN	Europe		Other European Country	Belgium	Female		56	112	81-100%	3:16-3:30	40	41	11-20	It is a way of life,Social life,Travel				Detractor	0	Detractor	0	Abbot Marathon Majors 6 stars		Other (Please specify)	normal every day food	No			75	No	No	No	Yes	No	No	No		Cushioned		None		Blisters,Heat Exhaustion,Knee Injury,Shin Splints		Rest		Physiotherapist		No	No
EN	Europe		England		Female		45	31	81-100%	4:16-4:30	41	41	21-30	To reach certain milestones						Detractor	3	100 Marathons from your national club,100 Marathon club UK milestones		Regular (including foods from all food groups)		Probably yes (no positive test)	Unusual fatigue		16	No	No	No	Yes	Yes	No	No	Yes	Cushioned		Max HR,Sleep,Steps		Blisters,Chafing,Plantar Fasciitis,Shin Splints		Foam Rolling,Pain Relief,Rest,RICE (Rest Ice Compression Elevation)		Specialist or other- Please detail here:	Friend who is a physiotherapist	Yes	No
EN	Europe		England		Female		54	194	61-80%	3:46-4:00	41	41	0-10	It is a way of life,Keeping fit and healthy,Sense of accomplishment,To reach certain milestones,Travel,Others - Please specify	Being outside in nature and exploring the countryside			Promoter	10	Detractor	3	100 Marathon club UK milestones,Marathon Maniacs,Mega Marathons		Regular (including foods from all food groups)		Probably yes (no positive test)	None		10	No	No	No	No	No				Cushioned		None		Blisters,Chafing,IT Band Syndrome,Muscle Pull		Rest,Stretching,Other - Please Specify	Massage	Specialist or other- Please detail here:	Sports massage therapist Chiropractor	No	No
EN	Australia/Oceania	Australia			Male		62	19	81-100%	4:16-4:30	56	58	0-10	Keeping fit and healthy,Sense of accomplishment,To reach certain milestones,Travel						Detractor	3	Abbot Marathon Majors 6 stars		Regular (including foods from all food groups)		Yes (positive test)	None		40	No	No	No	Yes	Yes	Yes	No	Yes	Cushioned		Heart Rate Variability,Max HR,Resting HR,Steps		Knee Injury,Runners Knee,Other - Please specify	Hamstrings	None		Physiotherapist		Yes	No
EN	Africa	South Africa			Male		44	20	0-20%	3:16-3:30	38	38	0-10	Continuous performance improvement,It is a way of life,Keeping fit and healthy,Sense of accomplishment						Detractor	5	None of these		Regular (including foods from all food groups)		Yes (positive test)	None		75	Yes	Yes	Yes	Yes	No	No	No		Cushioned		Max HR,Resting HR,Sleep,Steps,VO2MAX		Chafing,IT Band Syndrome,Knee Injury,Runners Knee,Tendonitus (Achilles tendinopathy)		Elevation,Foam Rolling,Ice (Ice packs or cold compresses),Rest,RICE (Rest Ice Compression Elevation),Stretching		Physiotherapist,Another Medical Professional (e.g. Physician, A&E)		No	No
EN	Europe		England		Male		33	126	81-100%	4:01-4:15	29	29	41-50	Keeping fit and healthy,Multi Marahon Series (e.g. 10 in 10 days),Sense of accomplishment,Social life,To reach certain milestones		10 in 10 days,12 in 12 months,52 in 52 weeks,100 in 100 weeks		Passive	8	Detractor	0	100 Marathon club UK milestones,Abbot Marathon Majors 6 stars,Global Marathon challenges		Pesco-vegetarian (includes fish)		No			60	No	No	No	Yes	Yes	No	No	Yes	Cushioned		Calories,Floors,Sleep,Steps,VO2MAX		Ankle Injury,Blisters,Chafing,Calf Injury,Knee Injury,Shin Splints		Compression,Foam Rolling,Ice (Ice packs or cold compresses),Other - Please Specify	Sports massage gun	No I do not seek professional advise for running injuries		No	No
EN	Europe		England		Female		52	42	21-40%	5:16-5:30	43	43	0-10	Keeping fit and healthy,Sense of accomplishment,Social life						Detractor	0	Other - Please specify	100 Half marathon club	Pesco-vegetarian (includes fish)		Yes (positive test)	Heart Palpitations,Shortness of breath,Unusual fatigue		50	No	No	No	Yes	No	No	No		Cushioned		Steps,Other - Please Specify	Miles	None		None		No I do not seek professional advise for running injuries		No	No
EN	Europe		Other European Country	Finland	Male		56	468	0-20%	3:01-3:15	31	31	>51	Competition,It is a way of life,Keeping fit and healthy,Multi Marahon Series (e.g. 10 in 10 days),Running streaks,Sense of accomplishment,Social life,To reach certain milestones,Travel		Back to Back,Other - Please specify	100 in a year	Detractor	4	Detractor	4	50 US states,100 Marathons from your national club,Abbot Marathon Majors 6 stars,World Mega Marathon ranking 300+		Other (Please specify)	Food	Yes (positive test)	None		140	Yes	Yes	Yes	Yes	No	Yes	Yes		Cushioned,Motion Control (made to support heavy weight, flat feet or severe overpronation),Stability,Light weight		Heart Rate Variability,Resting HR,Sleep,Steps		Ankle Injury,Blisters,Chafing,Frostbite,Heat Exhaustion,IT Band Syndrome,Muscle Pull,Stress Fracture		Rest,Stretching		Physiotherapist,Specialist or other- Please detail here:	Coach	No	No
EN	Europe		Other European Country	Finland	Female		61	263	0-20%	3:46-4:00	38	39	41-50	It is a way of life,Keeping fit and healthy,Social life,Total numbers				Promoter	9	Promoter	9	100 Marathons from your national club,Other - Please specify	6 marathons in6days 100 marathons on 1 year	Regular (including foods from all food groups)		Yes (positive test)	None		100	No	No	Yes	Yes	No	No	No		Stability		Floors,Intensity minutes,Sleep,Steps,Stress		Ankle Injury,Plantar Fasciitis,Tendonitus (Achilles tendinopathy)		Foam Rolling,Ice (Ice packs or cold compresses),Rest,Stretching		Specialist or other- Please detail here:	I`n nurse myself : )	No	No
EN	Europe		Other European Country	Finland	Female		45	47	81-100%	3:46-4:00	38	38	11-20	Continuous performance improvement,It is a way of life,Keeping fit and healthy,Sense of accomplishment						Detractor	3	None of these		Regular (including foods from all food groups)		Yes (positive test)	None		20	No	No	No	Yes	No	No	No		Cushioned		Max HR,Steps		Blisters,Other - Please specify	Not injuries but osteoarthritis in a hip	Pain Relief,Rest,Stretching,Other - Please Specify	Massage	Physiotherapist,Specialist or other- Please detail here:	Massager	Yes	No
EN	Europe		Other European Country	Slovakia	Male		75	1000	0-20%	2:46-3:00	35	35	41-50	Keeping fit and healthy						Detractor	0	None of these		Regular (including foods from all food groups)		Probably yes (no positive test)	None		50	No	Yes	No	No	No				Light weight		Heart Rate Variability		Blisters,Calf Injury,Knee Injury,Muscle Pull		Rest		Physiotherapist		No	No
EN	Europe		Republic of Ireland		Male		55	451	81-100%	3:01-3:15	27	27	31-40	Keeping fit and healthy,Sense of accomplishment,Social life,Others - Please specify	Mind awareness			Detractor	5	Detractor	2	100 Marathons from your national club,Atlas 100-mile club milestones,MCI Ireland club milestones		Other (Please specify)	None	No			60	No	Yes	Yes	Yes	No	No	No		Cushioned		Calories,Intensity minutes,Steps		Ankle Injury,Blisters,Calf Injury,Heat Exhaustion,IT Band Syndrome,Muscle Pull,Plantar Fasciitis,Shin Splints,Tendonitus (Achilles tendinopathy)		Accupuncture,Foam Rolling,Stretching		Physiotherapist		No	No
EN	Europe		Other European Country	Finland	Male		43	380	81-100%	3:16-3:30	27	29	31-40	It is a way of life,Keeping fit and healthy,Sense of accomplishment,Social life,Total numbers				Passive	8	Detractor	3	100 Marathons from your national club,World Mega Marathon ranking 300+		Prefer not to say		No			55	No	No	No	Yes	Yes	No	No	No	Cushioned,Stability		Intensity minutes,Max HR,Sleep,Steps		None		Rest,Stretching		No I do not seek professional advise for running injuries		No	No
EN	Australia/Oceania	New Zealand			Male		76	226	81-100%	3:16-3:30	36	37	0-10	Keeping fit and healthy				Passive	8	Detractor	0	100 Marathons from your national club		Regular (including foods from all food groups)		No			50	No	No	No	No	No				Other - Please specify	Don't know.	None		Blisters,Chafing,Calf Injury,Heat Exhaustion,Hypothermia,Knee Injury,Muscle Pull,Shin Splints,Stress Fracture		Accupuncture,Rest,Support strapping		Specialist or other- Please detail here:	Chiropractor Acupuncture/Massage	No	No
EN	Europe		Other European Country	Czech Republic	Male		73	16	0-20%	3:01-3:15	33	33	0-10	Continuous performance improvement						Detractor	0	None of these		Other (Please specify)	Gluten free diet	Yes (positive test)	None		20	No	No	No	No	No				Stability		Max HR		Hip Injury		Accupuncture,Stretching		Specialist or other- Please detail here:	orthopedist	No	No
EN	Europe		Denmark		Male		41	130	81-100%	2:46-3:00	32	32	31-40	It is a way of life,Sense of accomplishment,Social life				Promoter	9	Promoter	9	100 Marathons from your national club		Prefer not to say		Yes (positive test)	None		90	No	No	No	Yes	Yes	No	No	Yes	Cushioned,Light weight		Steps,VO2MAX		Blisters,Knee Injury		None		Physiotherapist,Another Medical Professional (e.g. Physician, A&E)		No	No
EN	Europe		Denmark		Male		63	231	0-20%	3:01-3:15	36	36	11-20	It is a way of life,Social life,Total numbers,Travel				Detractor	6	Detractor	6	100 Marathons from your national club		Other (Please specify)	None	No			60	No	No	No	Yes	No	No			Stability		None		Ankle Injury,Knee Injury		Pain Relief		Physiotherapist		No	No
EN	Europe		England		Female		69	110	81-100%	5:01-5:15	60	60	11-20	Awards,Competition,Continuous performance improvement,Keeping fit and healthy,Sense of accomplishment,To reach certain milestones,Travel						Passive	8	7 continents,100 Marathons from your national club,100 Marathon club UK milestones,Other - Please specify	Current target Grand Slam 7 on 7 - done Antarctic Ice marathon -done North Pole marathon still to do Also GWR - oldest female	Other (Please specify)	Macro diet- emphasis on protein low ish fat and carbs (F 70g, C 70 - 120g depending on training load)	Yes (positive test)	Other (Please specify)	None after about 4 weeks	15	No	No	Yes	Yes	No	No	Yes		Cushioned		Calories,Heart Rate Variability,Floors,Max HR,Pulse Ox,Respiration,Resting HR,Sleep,Steps,Other - Please Specify	Sleep Recovery	Ankle Injury,Calf Injury,IT Band Syndrome		Foam Rolling,Other - Please Specify	Chiropractor Massage Rehab exercises (physio)	Physiotherapist,Specialist or other- Please detail here:	Chiropractor	No	No
EN	Europe		Denmark		Male		54	271	0-20%	3:31-3:45	39	40	21-30	It is a way of life,Keeping fit and healthy,Multi Marahon Series (e.g. 10 in 10 days),To reach certain milestones,Travel,Others - Please specify	The mind game, with my self when I hit the Wall, and mind say stop this Then the fight starts to get to the finish line	5 in 5 days,12 in 12 months		Passive	7	Detractor	2	100 Marathons from your national club,Abbot Marathon Majors 6 stars,Marathon Globetrotters		Other (Please specify)	NO diet	Yes (positive test)	None		40	No	No	No	Yes	No	No	No		Cushioned		Floors,Sleep,Steps,VO2MAX		Blisters,Tendonitus (Achilles tendinopathy)		None		Physiotherapist		Yes	No
EN	Europe		Denmark		Male		54	360	0-20%	3:31-3:45	46	45	41-50	Awards,Social life,Total numbers				Promoter	10			Other - Please specify	Klub100 Denmark	Other (Please specify)	I just eat all	Yes (positive test)	Elevated Heart rate,Forced to stop running for a period,Shortness of breath		60	No	No	No	Yes	Yes	No		No	Cushioned		Calories
EN	Europe		Denmark		Male		61	140		2:46-3:00	30	30	0-10	It is a way of life				Passive	7			100 Marathons from your national club		Regular (including foods from all food groups)		Probably yes (no positive test)	Unusual fatigue		40	No	Yes	Yes	Yes	No	Yes	Yes		Motion Control (made to support heavy weight, flat feet or severe overpronation)		Heart Rate Variability,Pulse Ox,Resting HR,Sleep,Stress		None		Accupuncture		Another Medical Professional (e.g. Physician, A&E)		No	No
EN	Europe		Denmark		Male		52	116	81-100%	3:16-3:30	46	47	41-50	Continuous performance improvement,It is a way of life,Social life				Passive	8	Detractor	6	100 Marathons from your national club		Regular (including foods from all food groups)		No			80	No	Yes	Yes	Yes	Yes	Yes	Yes	Yes	Cushioned,Light weight		Calories,Heart Rate Variability,Floors,Intensity minutes,Max HR,Pulse Ox,Respiration,Resting HR,Sleep,Steps,Stress,VO2MAX,Other - Please Specify	SkinTemp	None		Compression,Rest,Stretching		Specialist or other- Please detail here:	Osteopathy	No	No
EN
EN
EN	Europe		Denmark		Female		42	44	81-100%	4:16-4:30	40	35	11-20	Keeping fit and healthy,Sense of accomplishment,To reach certain milestones,Travel						Detractor	0	None of these		Regular (including foods from all food groups)		Yes (positive test)	None		45	Yes	No	No	Yes	No	No	No		Stability		Calories,Floors,Intensity minutes,Max HR,Pulse Ox,Sleep,Steps,Stress,VO2MAX		Knee Injury,Tendonitus (Achilles tendinopathy)		Pain Relief,Rest,RICE (Rest Ice Compression Elevation),Support strapping,Stretching		Physiotherapist,Another Medical Professional (e.g. Physician, A&E)		Yes	No
EN	Europe		Germany		Male		53	871	61-80%	2:31-2:45	24	24	31-40	Competition,It is a way of life,Keeping fit and healthy,Multi Marahon Series (e.g. 10 in 10 days),Sense of accomplishment,Social life,To reach certain milestones,Total numbers		10 in 10 days		Promoter	9	Promoter	9	100 Marathons from your national club,World Mega Marathon ranking 300+		Regular (including foods from all food groups)		Yes (positive test)	None		65	No	No	Yes	Yes	No	No			Cushioned		None		Blisters,Chafing,Heat Exhaustion,Knee Injury,Shin Splints		Rest,Stretching,Surgery		Physiotherapist,Another Medical Professional (e.g. Physician, A&E),Specialist or other- Please detail here:		No	No
EN	Europe		Denmark		Male		60	212	0-20%	3:31-3:45	52	52	31-40	It is a way of life,Keeping fit and healthy,Running streaks				Passive	8	Passive	8	100 Marathons from your national club,Marathon Globetrotters		Regular (including foods from all food groups)		Yes (positive test)	None		70	No	No	No	Yes	No	No			Stability		VO2MAX		None		Rest		No I do not seek professional advise for running injuries		No	No
EN	Europe		Denmark		Male		53	262	81-100%	3:16-3:30	38	38	11-20	It is a way of life,Keeping fit and healthy,Sense of accomplishment,Social life,Others - Please specify	To keep depressions away			Passive	8	Detractor	0	100 Marathons from your national club		Regular (including foods from all food groups)		No			60	No	No	Yes	Yes	No	No	No		Cushioned,Stability		Calories,Heart Rate Variability,Intensity minutes,Max HR,Resting HR,Steps		Chafing,Knee Injury,Other - Please specify	Fractured arm and toe	Ice (Ice packs or cold compresses),Support strapping		No I do not seek professional advise for running injuries		No	No
EN	Europe		Germany		Male		62	217	41-60%	3:31-3:45	32	33	0-10	Continuous performance improvement,It is a way of life,Keeping fit and healthy,Sense of accomplishment,Social life,Total numbers,Travel				Promoter	9	Detractor	5	100 Marathons from your national club		Pesco-vegetarian (includes fish)		Yes (positive test)	Other (Please specify)	5 weeks of recovering before next marathon	60	No	No	Yes	Yes	No	Yes	No		Cushioned,Other - Please specify	mostly Altra shoes with wide footbox and no raised heels	None		Blisters,Knee Injury,Plantar Fasciitis		Rest,Stretching		Physiotherapist		No	No
EN	Europe		Germany		Male		53	144	21-40%	4:01-4:15	39	39	41-50	It is a way of life,Keeping fit and healthy,Social life,Total numbers,Travel				Promoter	10	Passive	8	100 Marathons from your national club		Vegetarian (excludes fish, poultry, and meat)		Yes (positive test)	Elevated Heart rate,Forced to stop running for a period		50	No	No	Yes	Yes	No	No	No		Stability		Heart Rate Variability,Intensity minutes,Max HR,Pulse Ox,Sleep,Steps,Stress		None		Compression,Ice (Ice packs or cold compresses),Rest		No I do not seek professional advise for running injuries		No	No
EN	Europe		England		Male		57	82	61-80%	3:16-3:30	46	48	11-20	Awards,Continuous performance improvement,Keeping fit and healthy,Sense of accomplishment,Social life,To reach certain milestones,Others - Please specify	Used as a form of meditation, particularly ultras					Detractor	5	None of these		Regular (including foods from all food groups)		Yes (positive test)	None		48	No	No	Yes	Yes	No	No	No		Cushioned,Stability,Light weight		Resting HR,Sleep		Blisters,Chafing		Compression,Elevation,Foam Rolling,Pain Relief,Rest,RICE (Rest Ice Compression Elevation),Stretching		Physiotherapist		No	No
EN	Europe		Germany		Male		48	104	0-20%	2:46-3:00	37	38	11-20	Competition,Sense of accomplishment,Total numbers				Passive	8	Detractor	1	100 Marathons from your national club		Vegan		Yes (positive test)	Unusual fatigue		55	No	No	No	Yes	No	No	No		Light weight		None		Ankle Injury,Chafing,Plantar Fasciitis,Shin Splints,Tendonitus (Achilles tendinopathy)		Rest,Other - Please Specify	deep pressure massage	Physiotherapist		No	No
EN	Australia/Oceania	Australia			Male		58	624	21-40%	2:46-3:00	21	22	11-20	Awards,Competition,It is a way of life,Keeping fit and healthy,Sense of accomplishment,Social life,Total numbers,Travel				Passive	7	Detractor	5	100 Marathons from your national club		Regular (including foods from all food groups)		No			90	No	No	No	Yes	No	No	No		Light weight		Resting HR,Sleep,Steps,VO2MAX		Chafing,Calf Injury,Hypothermia,Morton's Neuroma,Plantar Fasciitis,Shin Splints,Tendonitus (Achilles tendinopathy)		Ice (Ice packs or cold compresses),RICE (Rest Ice Compression Elevation),Other - Please Specify	Massage	Physiotherapist		No	No
EN	Europe		Germany		Female		53	164	61-80%	4:31-4:45	44	45	41-50	It is a way of life,Keeping fit and healthy				Promoter	10	Detractor	5	100 Marathons from your national club		Regular (including foods from all food groups)		Yes (positive test)	None		60	No	No	No	Yes	No	No	Yes		Stability		None		None		Compression,Foam Rolling,Stretching		No I do not seek professional advise for running injuries		No	No
EN	Europe		Germany		Male		63	103	41-60%	3:46-4:00	26	27	0-10	Competition,Keeping fit and healthy,Sense of accomplishment,Travel				Promoter	9	Promoter	9	100 Marathons from your national club		Regular (including foods from all food groups)		No			30	No	No	Yes	Yes	No	Yes	Yes		Cushioned		Heart Rate Variability,Max HR,Pulse Ox,Respiration,Resting HR,Sleep,Stress,VO2MAX		Blisters,Chafing,IT Band Syndrome		Foam Rolling,Ice (Ice packs or cold compresses),Rest		No I do not seek professional advise for running injuries		No	No
EN	Europe		Wales		Male		56	463	81-100%	3:01-3:15	40	42	>51	It is a way of life,Keeping fit and healthy,Multi Marahon Series (e.g. 10 in 10 days),Running streaks,Sense of accomplishment,Social life,To reach certain milestones,Total numbers,Travel		Other - Please specify	More than 100 marathons in one year	Promoter	9	Detractor	0	Other - Please specify	100mc Finland	Regular (including foods from all food groups)		Yes (positive test)	Elevated Heart rate,Forced to stop running for a period,Shortness of breath,Unusual fatigue		100	No	No	Yes	Yes	No	No	No		Light weight,Minimal e.g. Vibram or flip flops		Other - Please Specify	Kms and elevation gained	Blisters,Chafing,Frostbite,Heat Exhaustion,Runners Knee		Ice (Ice packs or cold compresses)		No I do not seek professional advise for running injuries		No	No
EN	Europe		England		Male		57	36	81-100%	2:46-3:00	45	46	0-10	Others - Please specify	I enjoy the runs					Detractor	0	None of these		Regular (including foods from all food groups)		Yes (positive test)	Other (Please specify)	Tinnitus, headaches, noise sensitivity, kidney pain.	50	Yes	No	Yes	Yes	No	Yes	Yes		Cushioned		Heart Rate Variability,Max HR,Pulse Ox,Respiration,Resting HR,Sleep,Steps,Stress,VO2MAX		Calf Injury		Other - Please Specify	Massage	Physiotherapist		No	No
EN	Europe		Denmark		Male		27	901	81-100%	2:46-3:00	15	15	>51	It is a way of life,Keeping fit and healthy,Multi Marahon Series (e.g. 10 in 10 days),Sense of accomplishment,Social life,To reach certain milestones,Others - Please specify	Nature, no stress, psychology	5 in 5 days,10 in 10 days,Back to Back,Other - Please specify	20 in 10 days. +100 in one year	Promoter	9	Promoter	9	100 Marathons from your national club,World Mega Marathon ranking 300+		Prefer not to say		No			100	No	No	Yes	Yes	No	No	No		Cushioned,Stability		Steps		None		Rest		No I do not seek professional advise for running injuries		No	No
EN	Europe		Republic of Ireland		Female		47	132	61-80%	3:16-3:30	39	39	21-30	Continuous performance improvement,It is a way of life,Keeping fit and healthy,Social life				Passive	7	Passive	7	Abbot Marathon Majors 6 stars,MCI Ireland club milestones		Regular (including foods from all food groups)		Yes (positive test)	Shortness of breath		100	Yes	No	Yes	Yes	Yes	Yes	No	No	Cushioned		Heart Rate Variability,Steps,Stress		Blisters,Chafing,Calf Injury,Heat Exhaustion,IT Band Syndrome,Muscle Pull,Plantar Fasciitis,Runners Knee,Shin Splints,Stress Fracture		Foam Rolling,Rest,Support strapping,Other - Please Specify	Dry needling	Physiotherapist		No	No
EN	Europe		Republic of Ireland		Male		60	322	41-60%	2:46-3:00	19	19	11-20	It is a way of life				Detractor	1	Detractor	1	None of these		Regular (including foods from all food groups)		No			50	No	No	Yes	Yes	No	No			Cushioned		Resting HR,Steps,VO2MAX		Hip Injury,IT Band Syndrome,Plantar Fasciitis,Runners Knee,Shin Splints,Tendonitus (Achilles tendinopathy)		Ice (Ice packs or cold compresses),Pain Relief,Stretching,Other - Please Specify	Epidural injections	Another Medical Professional (e.g. Physician, A&E)		Yes	No
EN	Europe		Republic of Ireland		Female		54	166	21-40%	3:31-3:45	30	31	11-20	It is a way of life,Keeping fit and healthy,Sense of accomplishment,Social life,Travel				Promoter	10			MCI Ireland club milestones		Regular (including foods from all food groups)		No			5	No	No	No	Yes	Yes	No		No	Cushioned		Intensity minutes		IT Band Syndrome		Rest,Other - Please Specify	Physio	Another Medical Professional (e.g. Physician, A&E)		No	No
EN	Europe		Republic of Ireland		Male		32	30	41-60%	3:46-4:00	22	23	0-10	Keeping fit and healthy,Sense of accomplishment						Detractor	5	MCI Ireland club milestones		Other (Please specify)	gluten free	Yes (positive test)	Forced to stop running for a period,Muscle aches,Shortness of breath,Unusual fatigue		45	No	No	No	Yes	Yes	No	No	No	Stability		None		Blisters,Chafing,Hip Injury,IT Band Syndrome,Knee Injury		Pain Relief,Rest,RICE (Rest Ice Compression Elevation),Support strapping,Stretching		Physiotherapist		Yes	Yes
EN	Europe		Other European Country	Finland	Male		44	204	81-100%	3:31-3:45	28	30	21-30	It is a way of life,Keeping fit and healthy,Multi Marahon Series (e.g. 10 in 10 days),Sense of accomplishment,Social life,To reach certain milestones,Total numbers,Travel,Others - Please specify	I just love running	5 in 5 days,12 in 12 months,Other - Please specify	24 in 12 months (B-class in Finland)	Promoter	9	Detractor	6	100 Marathons from your national club		Regular (including foods from all food groups)		Yes (positive test)	None		42	No	Yes	No	Yes	Yes	No	No	No	Cushioned		Steps,Stress		Blisters,Knee Injury,Plantar Fasciitis,Runners Knee		Compression,Foam Rolling,Ice (Ice packs or cold compresses),Pain Relief,Rest,Stretching		Another Medical Professional (e.g. Physician, A&E)		No	No
EN
EN	Europe		Republic of Ireland		Male		50	13	81-100%	3:01-3:15	45	48	0-10	Continuous performance improvement,Keeping fit and healthy,Sense of accomplishment,Social life						Detractor	4
EN	Europe		England		Male		59	173	41-60%	3:31-3:45	43	44	11-20	Keeping fit and healthy,Sense of accomplishment				Passive	7			100 Marathons from your national club,100 Marathon club UK milestones		Regular (including foods from all food groups)		Yes (positive test)	None		50	No	No	Yes	Yes	No	No			Cushioned		None		Calf Injury,Muscle Pull		Rest,RICE (Rest Ice Compression Elevation)		Physiotherapist		No	No
EN	Europe		Northern Ireland		Male		50	155	81-100%	3:16-3:30	46	46	21-30	It is a way of life,Keeping fit and healthy,Sense of accomplishment,Social life				Passive	8	Detractor	6	100 Marathon club UK milestones,Abbot Marathon Majors 6 stars		Regular (including foods from all food groups)		No			50	No	Yes	Yes	Yes	No	Yes	Yes		Stability		Calories,Heart Rate Variability,Floors,Intensity minutes,Pulse Ox,Respiration,Resting HR,Sleep,Steps,Stress,VO2MAX		Blisters,Chafing,IT Band Syndrome,Muscle Pull,Plantar Fasciitis,Tendonitus (Achilles tendinopathy)		Accupuncture,Compression,Pain Relief,Rest,Support strapping,Stretching		Physiotherapist		Yes	Yes
EN	North America	Mexico			Female		39	6	0-20%	4:46-5:00	32	32	0-10	Keeping fit and healthy,Sense of accomplishment,Travel						Detractor	6	Abbot Marathon Majors 6 stars		Regular (including foods from all food groups)		Yes (positive test)	Elevated Heart rate,Forced to stop running for a period,Shortness of breath,Unusual fatigue		60	Yes	Yes	Yes	Yes	Yes	No	No	Yes	Cushioned		Heart Rate Variability,Steps		Ankle Injury,Blisters,Chafing,Calf Injury,Plantar Fasciitis,Tendonitus (Achilles tendinopathy)		Foam Rolling,Ice (Ice packs or cold compresses),Rest,Stretching,Other - Please Specify	Sports massage	Physiotherapist		Yes	No
EN	Europe		Republic of Ireland		Female		39	9	0-20%	4:16-4:30	37	37	0-10	Keeping fit and healthy,Social life						Detractor	1	None of these		Regular (including foods from all food groups)		Yes (positive test)	None		60	Yes	No	No	Yes	No	No			Cushioned		Heart Rate Variability,Intensity minutes,Max HR,Sleep,Steps,Stress,VO2MAX		Blisters,Chafing,Hip Injury,Morton's Neuroma,Plantar Fasciitis		Foam Rolling,Rest,Stretching		Physiotherapist		Yes	No
EN	Europe		England		Male		55	10	0-20%	4:16-4:30	48	48	0-10	Keeping fit and healthy,Sense of accomplishment,Travel,Others - Please specify	Keeps my IBS In check					Detractor	0	Abbot Marathon Majors 6 stars		Other (Please specify)	Restricted diet due to IBS More protein than carbs and low carb	Yes (positive test)	Muscle aches,Unusual fatigue		50	No	No	Yes	Yes	Yes	No	No	Yes	Other - Please specify	Wide fitting and zero drop due to Morton’s neuroma	None		Ankle Injury,Chafing,IT Band Syndrome,Muscle Pull,Morton's Neuroma,Other - Please specify	Heel spur	Compression,Surgery		Physiotherapist,Another Medical Professional (e.g. Physician, A&E)		Yes	No
EN	North America	Canada			Female		52	4	81-100%	4:31-4:45	39	40	0-10	Keeping fit and healthy,Sense of accomplishment,To reach certain milestones						Detractor	0	None of these		Regular (including foods from all food groups)		Yes (positive test)	None		24	Yes	Yes	No	Yes	Yes	No	No	No	Cushioned		Calories,Intensity minutes,Max HR,Resting HR,Steps,VO2MAX		Ankle Injury,Plantar Fasciitis,Stress Fracture,Other - Please specify	Posterior tibial tendonapathy	Other - Please Specify	PT	Physiotherapist		No	No
EN	Europe		England		Male		50	314	81-100%	3:16-3:30	42	42	21-30	It is a way of life,Social life,To reach certain milestones,Travel				Passive	7	Passive	7	100 Marathons from your national club,100 Marathon club UK milestones,Global Marathon challenges,Marathon Globetrotters,Marathon Maniacs,World Mega Marathon ranking 300+,Other - Please specify	Marathon Country Club	Regular (including foods from all food groups)		Yes (positive test)	Elevated Heart rate,Forced to stop running for a period,Shortness of breath,Unusual fatigue		60	No	No	Yes	Yes	Yes	Yes	No	Yes	Cushioned,Light weight		Calories,Intensity minutes,Max HR,Resting HR,Sleep		Blisters,Chafing,Heat Exhaustion,IT Band Syndrome,Muscle Pull,Morton's Neuroma,Shin Splints,Other - Please specify	Lower back pain	Compression,Elevation,Ice (Ice packs or cold compresses),Rest,RICE (Rest Ice Compression Elevation),Support strapping,Other - Please Specify	Sports massage/physio	Physiotherapist,Another Medical Professional (e.g. Physician, A&E)		Yes	No
EN	Europe		Northern Ireland		Male		67	708	21-40%	2:46-3:00	33	24	31-40	Competition,Continuous performance improvement,It is a way of life,Keeping fit and healthy,Multi Marahon Series (e.g. 10 in 10 days),Running streaks,Sense of accomplishment,Social life,To reach certain milestones,Total numbers,Travel,Others - Please specify	Raising much needed funds for charity, mainly cancer charities . Have raised over one million euros for charity from my marathons and ultras. I never claim expenses when I run marathons/ ultras for charity.	5 in 5 days,10 in 10 days,Back to Back,Other - Please specify	1,000 kms / 620 mile multi ultra marathon events. Best time for multi 1,000km event is 112 hours (run 42 miles non stop for 15 consecutive days non stop). Also running B2B’s in 2 days in 2 different continents such as London and Boston .Stomach churning few days as you have to catch planes in time etc. often run 4 marathons 4 consecutive days in 4 different countries	Detractor	4	Detractor	4	7 continents,50 US states,100 Marathons from your national club,100 Marathon club UK milestones,Abbot Marathon Majors 6 stars,Global Marathon challenges,Marathon Globetrotters,Marathon Maniacs,Mega Marathons,Triple crown of Ultras (Comrades, Western States, UTMB),World Mega Marathon ranking 300+		Pesco-vegetarian (includes fish)		Yes (positive test)	None		140	No	Yes	Yes	Yes	No	No	No		Cushioned,Stability,Light weight,Other - Please specify	Sometimes run marathons bare foot if on beach or muddy cross country	Heart Rate Variability,Intensity minutes,Pulse Ox,Respiration,Resting HR,Stress,VO2MAX		Ankle Injury,Calf Injury,Frostbite,Knee Injury,Tendonitus (Achilles tendinopathy),Other - Please specify	Keep getting run over by hit and run drivers when I’m running or mountain biking. Depending on injuries, I make it my mission to get back to full fitness asap	Compression,Elevation,Foam Rolling,Support strapping,Stretching,Other - Please Specify	Deep tissue sports massage	Physiotherapist		No	No
EN	North America	USA			Male		57	9	81-100%	3:46-4:00	49	49	0-10	Continuous performance improvement,Keeping fit and healthy,Sense of accomplishment,Others - Please specify	Charity runner.					Detractor	0	None of these		Regular (including foods from all food groups)		Yes (positive test)	None		40	Yes	Yes	No	Yes	No	No	No		Light weight		Heart Rate Variability,Intensity minutes,Max HR,Resting HR,VO2MAX		Hip Injury,Morton's Neuroma		Rest,Stretching		Physiotherapist		No	No
EN	Europe		Other European Country	Switzerland	Female		58	68	81-100%	3:31-3:45	46	47	0-10	It is a way of life						Detractor	4	Abbot Marathon Majors 6 stars		Regular (including foods from all food groups)		Yes (positive test)	Forced to stop running for a period,Muscle aches,Shortness of breath,Unusual fatigue		60	No	No	No	Yes	Yes	No	No	No	Light weight		Max HR		Calf Injury,Hip Injury,Hypothermia,IT Band Syndrome,Morton's Neuroma,Plantar Fasciitis,Shin Splints		Rest		No I do not seek professional advise for running injuries		No	No
EN	Europe		England		Male		50	354	21-40%	3:01-3:15	32	32	11-20	Competition,It is a way of life,Multi Marahon Series (e.g. 10 in 10 days),Sense of accomplishment,Social life,To reach certain milestones,Total numbers,Travel		5 in 5 days,10 in 10 days,12 in 12 months,52 in 52 weeks,Back to Back		Promoter	10	Promoter	9	50 US states,100 Marathons from your national club,100 Marathon club UK milestones,Abbot Marathon Majors 6 stars,Global Marathon challenges,Marathon Globetrotters,Marathon Maniacs,Mega Marathons,World Mega Marathon ranking 300+		Regular (including foods from all food groups)		No			35	No	No	No	Yes	No	No	No		Cushioned,Light weight		Resting HR,Sleep,Steps		Blisters,Chafing		None		Physiotherapist		No	No
EN	Europe		Italy		Male		53	39	81-100%	4:01-4:15	41	41	0-10	It is a way of life,Keeping fit and healthy,Sense of accomplishment						Passive	8	100 Marathons from your national club		Regular (including foods from all food groups)		Yes (positive test)	Forced to stop running for a period,Muscle aches,Unusual fatigue		50	Yes	No	No	Yes	No	Yes	Yes		Cushioned		Heart Rate Variability,Intensity minutes,Max HR,Sleep,Steps,VO2MAX		Ankle Injury,Blisters,Chafing,IT Band Syndrome,Plantar Fasciitis		Foam Rolling,Pain Relief,Rest,Support strapping		Physiotherapist,Another Medical Professional (e.g. Physician, A&E)		No	No
EN	North America	Canada			Male		50	8	81-100%	3:31-3:45	11	40	0-10	Competition,It is a way of life,Keeping fit and healthy						Detractor	0	None of these		Regular (including foods from all food groups)		Yes (positive test)	Forced to stop running for a period,Shortness of breath,Unusual fatigue		50	No	No	No	Yes	Yes	No	No	No	Light weight		None		Blisters		Rest		No I do not seek professional advise for running injuries		No	No
EN	Asia	Japan			Male		55	935	81-100%	3:01-3:15	39	39	>51	It is a way of life,Keeping fit and healthy,Running streaks,Sense of accomplishment,Social life,Total numbers				Promoter	10	Detractor	3	100 Marathons from your national club,World Mega Marathon ranking 300+		Regular (including foods from all food groups)		Yes (positive test)	None		150	No	No	No	Yes	No	No	No		Cushioned,Stability,Light weight,Minimal e.g. Vibram or flip flops		Heart Rate Variability,Max HR,Resting HR,Sleep,Steps		Blisters,Calf Injury,Hip Injury,Hypothermia,Knee Injury,Runners Knee,Shin Splints		Compression,Elevation,Ice (Ice packs or cold compresses),Rest,RICE (Rest Ice Compression Elevation),Support strapping,Stretching		No I do not seek professional advise for running injuries		No	No
EN	Asia	Japan			Male		78	380	81-100%	>6:00	60	60	11-20	Keeping fit and healthy				Detractor	5			World Mega Marathon ranking 300+		Prefer not to say		No			10	No	Yes	Yes	Yes	No	No			Stability		Calories		Knee Injury		Ice (Ice packs or cold compresses)		Physiotherapist		Yes	Yes
EN
EN	North America	USA			Male		63	473	61-80%	3:16-3:30	42	42	31-40	It is a way of life,Sense of accomplishment,Social life,To reach certain milestones				Detractor	6	Detractor	3	50 US states,100 Marathons from your national club,Marathon Maniacs,Mega Marathons,World Mega Marathon ranking 300+		Pesco-vegetarian (includes fish)		Yes (positive test)	None		60	No	No	No	Yes	No	No	No		Stability		None		Blisters,Chafing,Knee Injury,Muscle Pull,Shin Splints,Tendonitus (Achilles tendinopathy),Other - Please specify	Severe Bunion	Foam Rolling,Support strapping		Specialist or other- Please detail here:	Purpose built insoles to counteract problems as a result of a heridatry severe bunion	No	No
EN	Europe		Other European Country	Cyprus	Male		32	8	81-100%	3:46-4:00	23	25	0-10	It is a way of life,Keeping fit and healthy,Sense of accomplishment,To reach certain milestones,Travel						Detractor	4	None of these		Regular (including foods from all food groups)		Yes (positive test)	Unusual fatigue		60	No	Yes	Yes	Yes	Yes	No	No	No	Cushioned		Max HR,Resting HR,Sleep,VO2MAX		Blisters,Chafing,Heat Exhaustion,Runners Knee,Shin Splints		Compression,Ice (Ice packs or cold compresses),Rest,Stretching,Other - Please Specify	Physiotherapist - Massage	Physiotherapist		No	No
EN	North America	United States			Male		60	118	61-80%	3:16-3:30	30	24	0-10	It is a way of life,Keeping fit and healthy,Sense of accomplishment,Social life				Passive	8	Detractor	3
EN	Europe		Scotland		Male		59	599	61-80%	2:46-3:00	22	22	21-30	It is a way of life,Keeping fit and healthy,Multi Marahon Series (e.g. 10 in 10 days),Sense of accomplishment,Social life,To reach certain milestones,Travel,Others - Please specify	Counties	10 in 10 days,52 in 52 weeks,100 in 100 weeks,Back to Back		Promoter	9			100 Marathons from your national club,100 Marathon club UK milestones,Mega Marathons,World Mega Marathon ranking 300+		Regular (including foods from all food groups)		No			50	No	No	No	Yes	No	No	No		Cushioned		Heart Rate Variability,Intensity minutes,Resting HR,Sleep,Steps,Stress,VO2MAX		Ankle Injury,Blisters,IT Band Syndrome,Knee Injury		Foam Rolling,Pain Relief,Support strapping		Physiotherapist		No	No
EN	Europe		Republic of Ireland		Male		73	253	81-100%	2:16-2:30	38	41	11-20	Keeping fit and healthy,Sense of accomplishment,Social life				Passive	8			MCI Ireland club milestones,Mega Marathons,Other - Please specify	Virtual during Covid	Vegetarian (excludes fish, poultry, and meat)		Yes (positive test)	None		80	No	Yes	No	Yes	No	No	No		Cushioned		Other - Please Specify	Miles	Blisters,Calf Injury,Muscle Pull,Shin Splints		Foam Rolling,Ice (Ice packs or cold compresses),Stretching,Other - Please Specify	Massage	Physiotherapist		No	Yes
EN	Australia/Oceania	Australia			Male		41	106	61-80%	2:31-2:45	23	23	0-10	Continuous performance improvement,It is a way of life,Keeping fit and healthy,Sense of accomplishment,To reach certain milestones				Promoter	10	Detractor	2	100 Marathons from your national club		Other (Please specify)	LCHF	Yes (positive test)	Other (Please specify)	Approx 4-6 week total duration before 100% health (unvaccinated)	140	No	No	Yes	Yes	No	No	No		Cushioned,Stability,Other - Please specify	I wear my training shoes until they fall apart. I race in carbon plate shoes Nike	VO2MAX		Runners Knee,Other - Please specify	Hamstring tendinitis (6-8 weeks)	Accupuncture,Compression,Ice (Ice packs or cold compresses),Rest,RICE (Rest Ice Compression Elevation)		Physiotherapist,Another Medical Professional (e.g. Physician, A&E),Specialist or other- Please detail here:	Very rarely require specialist, rare to be injured .. but have used physio or Accupuncture	No	No
EN	Europe		Other European Country	Sweden	Male		58	87	81-100%	3:31-3:45	45	50	0-10	Keeping fit and healthy,Sense of accomplishment						Detractor	0	100 Marathons from your national club		Other (Please specify)	No diet in particular	No			70	No	Yes	Yes	Yes	No	No	No		Light weight		None		Other - Please specify	Have failed back operation in 2008 left permanent damage to my spine and right leg constantly in pain running helps ease it .	Accupuncture,Compression,Foam Rolling,Stretching		Physiotherapist,Another Medical Professional (e.g. Physician, A&E),Specialist or other- Please detail here:	Ligiment snapped at the base of my spine , had operation to remove L4/L5 and reattach ligiment , nerves damaged during operation .	No	No
EN	Europe		Other European Country	Finland	Male		64	388	81-100%	3:16-3:30	44	44	21-30	Continuous performance improvement,Keeping fit and healthy,To reach certain milestones				Passive	8	Detractor	5	100 Marathons from your national club,World Mega Marathon ranking 300+		Regular (including foods from all food groups)		Yes (positive test)	None		60	No	No	No	Yes	Yes	No	No	No	Cushioned,Stability		Max HR,Resting HR,Sleep,Steps,VO2MAX		Ankle Injury,Blisters,Chafing,Muscle Pull,Plantar Fasciitis,Runners Knee		Compression,Elevation,Pain Relief,Rest,Stretching		Physiotherapist,Another Medical Professional (e.g. Physician, A&E)		No	No
EN	Europe		Germany		Female		35	9	81-100%	3:31-3:45	20	22	0-10	Keeping fit and healthy,Sense of accomplishment,Travel						Detractor	0	Marathon Globetrotters		Regular (including foods from all food groups)		Yes (positive test)	Other (Please specify)	I just had it three weeks ago	25	Yes	Yes	No	Yes	No	Yes	Yes		Stability		Calories,Heart Rate Variability,Max HR		Hip Injury		None		Physiotherapist,Another Medical Professional (e.g. Physician, A&E)		No	No
EN	Australia/Oceania	Australia			Male		72	160	61-80%	3:01-3:15	24	26	0-10	It is a way of life,Keeping fit and healthy,Sense of accomplishment,To reach certain milestones				Passive	8	Detractor	5	Other - Please specify	Marathon in each Australian State	Regular (including foods from all food groups)		Yes (positive test)	Other (Please specify)	Brief interruption of training.	100	No	Yes	Yes	Yes	No	No			Stability		Respiration,Sleep		Blisters,Chafing,Muscle Pull,Plantar Fasciitis,Shin Splints		Foam Rolling,Rest,Stretching		Physiotherapist,Specialist or other- Please detail here:	Chiropractor	No	No
EN	Europe		Republic of Ireland		Male		67	65	81-100%	2:46-3:00	27	28	0-10	It is a way of life,Keeping fit and healthy						Detractor	1	MCI Ireland club milestones		Regular (including foods from all food groups)		No			75	No	Yes	Yes	Yes	Yes	No	No	Yes	Stability		Resting HR,Sleep,Steps		Ankle Injury,Blisters,Chafing,Calf Injury,Hip Injury,Muscle Pull		Pain Relief,Rest,Other - Please Specify	Laser treatment	Physiotherapist		No	Yes
EN	Africa	Nigeria			Female		56	108	81-100%	4:31-4:45	45	46	11-20	It is a way of life,Sense of accomplishment,To reach certain milestones,Travel				Promoter	10			7 continents,7 continents in 7 days,Marathon Globetrotters,Marathon Maniacs		Regular (including foods from all food groups)		Probably yes (no positive test)	Elevated Heart rate,Forced to stop running for a period,Heart Palpitations,Shortness of breath		35	No	Yes	No	Yes	No	No	No		Cushioned,Stability,Light weight		Max HR,Resting HR		Chafing,Knee Injury		Elevation,Foam Rolling,Rest		Physiotherapist		Yes	No
EN	Europe		Republic of Ireland		Male		53	198	81-100%	3:16-3:30	30	30	11-20	It is a way of life,Keeping fit and healthy,Sense of accomplishment,Social life,Total numbers				Promoter	10	Promoter	9	MCI Ireland club milestones		Regular (including foods from all food groups)		Yes (positive test)	None		80	No	No	Yes	Yes	Yes	No	No	No	Cushioned,Stability		Other - Please Specify	I train in the gym 4 times a week with a personal trainer and we monitor progress through weights, reps etc - not necessarily related to running but we concentrate a lot on core strength to help running technique.	IT Band Syndrome,Other - Please specify	ITBS a long time ago - I tend to have tight hamstrings and sometimes get that type of injury despite a lot of stretching in the gym.	Ice (Ice packs or cold compresses),RICE (Rest Ice Compression Elevation),Stretching		Specialist or other- Please detail here:	My personal trainer works on any injury or potential injury through movement and stretching.	No	No
EN	Europe		England		Female		44	545	0-20%	4:01-4:15	32	33	>51	It is a way of life,Multi Marahon Series (e.g. 10 in 10 days),Social life		5 in 5 days,10 in 10 days,12 in 12 months,52 in 52 weeks,100 in 100 weeks,Back to Back,Other - Please specify	10 in 5	Passive	8			100 Marathon club UK milestones,MCI Ireland club milestones,World Mega Marathon ranking 300+		Regular (including foods from all food groups)		Yes (positive test)	Elevated Heart rate,Forced to stop running for a period,Heart Palpitations,Muscle aches,Shortness of breath		40	No	No	No	No	Yes			No	Cushioned,Stability		None		Ankle Injury,Blisters,Chafing,Calf Injury,Heat Exhaustion,Hypothermia,Knee Injury,Muscle Pull,Morton's Neuroma,Shin Splints		Compression,Elevation,Ice (Ice packs or cold compresses),Pain Relief		Physiotherapist,Another Medical Professional (e.g. Physician, A&E)		Yes	Yes
EN	Europe		Republic of Ireland		Female		55	71	81-100%	3:46-4:00	30	30	0-10	Continuous performance improvement,It is a way of life,Keeping fit and healthy,Sense of accomplishment,Social life,To reach certain milestones,Travel						Detractor	6	MCI Ireland club milestones		Regular (including foods from all food groups)		Yes (positive test)	None		40	Yes	Yes	Yes	Yes	Yes	Yes	Yes	No	Stability		Heart Rate Variability,Max HR,Resting HR,Steps		Knee Injury,Runners Knee		Compression,Elevation		Physiotherapist,Specialist or other- Please detail here:	Physical therapists	Yes	Yes
EN	North America	United States of America			Male		45	7	0-20%	3:16-3:30	40	42	0-10	Keeping fit and healthy						Detractor	3	Abbot Marathon Majors 6 stars		Regular (including foods from all food groups)		No			70	No	Yes	Yes	Yes	Yes	No	No	Yes	Light weight		Intensity minutes		Ankle Injury,Hypothermia,Knee Injury,Muscle Pull,Plantar Fasciitis,Runners Knee		Compression,Foam Rolling,Ice (Ice packs or cold compresses),Pain Relief,Rest,Stretching		Physiotherapist		No	No
EN	South America	Brasil			Male		53	6	0-20%	4:16-4:30	40	46	0-10	Continuous performance improvement,Sense of accomplishment,Travel						Detractor	0	None of these		Regular (including foods from all food groups)		No			50	Yes	No	No	Yes	No	No			Motion Control (made to support heavy weight, flat feet or severe overpronation),Light weight		Calories,Intensity minutes,Respiration		Plantar Fasciitis,Shin Splints,Tendonitus (Achilles tendinopathy)		Compression,Ice (Ice packs or cold compresses),Rest,Stretching		Physiotherapist,Specialist or other- Please detail here:	Ortopedista	No	No
EN	Europe		Republic of Ireland		Female		55	90	81-100%	3:01-3:15	43	44	11-20	Awards,Competition,It is a way of life,Keeping fit and healthy,Sense of accomplishment,Social life,Travel						Promoter	10	100 Marathons from your national club,Abbot Marathon Majors 6 stars,MCI Ireland club milestones		Regular (including foods from all food groups)		No			80	Yes	No	Yes	Yes	Yes	No	No	No	Light weight		Calories,Max HR,Resting HR,Sleep,Steps,VO2MAX		None		Rest		Physiotherapist		No	No
EN	South America	Brazil			Male		48	110	0-20%	4:46-5:00	35	41	0-10	Keeping fit and healthy						Passive	7	None of these		Prefer not to say		No			36	Yes	Yes	No	Yes	No	No			Light weight		VO2MAX		None		Rest		No I do not seek professional advise for running injuries		No	No
EN	Europe		Republic of Ireland		Female		51	23	0-20%	4:46-5:00	41	41	0-10	Keeping fit and healthy						Detractor	3	7 continents		Regular (including foods from all food groups)		No			20	No	No	Yes	No	No				Cushioned,Stability		None		Hip Injury,IT Band Syndrome,Knee Injury		RICE (Rest Ice Compression Elevation)		Physiotherapist		Yes	No
EN	Europe		Republic of Ireland		Female		34	3	81-100%	3:16-3:30	33	34	0-10	Competition,Continuous performance improvement,It is a way of life,Keeping fit and healthy						Detractor	5	None of these		Regular (including foods from all food groups)		No			65	Yes	Yes	Yes	Yes	No	No	No		Cushioned,Stability		Calories,Heart Rate Variability,Intensity minutes,Resting HR,Steps,VO2MAX		Blisters,Chafing,Hip Injury		Ice (Ice packs or cold compresses),Pain Relief,Rest,Stretching		Physiotherapist		No	No
EN	South America	Brasil			Male		52	31		3:16-3:30	42	42	0-10	It is a way of life,Keeping fit and healthy,Sense of accomplishment,Travel						Detractor	5	None of these		Regular (including foods from all food groups)		Yes (positive test)	Forced to stop running for a period		80	Yes	Yes	No	Yes	Yes	Yes	No	No	Stability		Heart Rate Variability,Max HR,VO2MAX		Chafing,Hip Injury,IT Band Syndrome,Morton's Neuroma,Plantar Fasciitis,Shin Splints		Accupuncture,Compression,Ice (Ice packs or cold compresses),RICE (Rest Ice Compression Elevation),Stretching		Physiotherapist,Another Medical Professional (e.g. Physician, A&E)		Yes	No
EN	South America	Brasil			Male		47	58	0-20%	>6:00	40	44	0-10	Sense of accomplishment						Detractor	2	Other - Please specify	@Santistas_Corredores	Regular (including foods from all food groups)		Yes (positive test)	Elevated Heart rate,Shortness of breath,Unusual fatigue		40	No	Yes	Yes	Yes	No	No	No		Motion Control (made to support heavy weight, flat feet or severe overpronation)		Heart Rate Variability,Max HR,Pulse Ox,Respiration,Stress		Blisters,Chafing,Calf Injury,Plantar Fasciitis,Shin Splints		Ice (Ice packs or cold compresses),Stretching		No I do not seek professional advise for running injuries		No	Yes
EN	Europe		Northern Ireland		Female		54	20	81-100%	3:46-4:00	42	45	0-10	Continuous performance improvement,Keeping fit and healthy,Sense of accomplishment,To reach certain milestones,Travel						Passive	8	7 continents,Abbot Marathon Majors 6 stars,Marathon Globetrotters		Paleo		No			80	Yes	Yes	No	No	No				Cushioned		None		IT Band Syndrome		Accupuncture,Compression,Ice (Ice packs or cold compresses),Stretching		Physiotherapist		Yes	Yes
EN	Europe		Republic of Ireland		Male		49	39	41-60%	3:31-3:45	33	33	0-10	Sense of accomplishment,Travel						Detractor	0	None of these		Regular (including foods from all food groups)		Yes (positive test)	None		90	Yes	No	Yes	Yes	Yes	No		Yes	Cushioned,Light weight		None		Chafing,Calf Injury,Heat Exhaustion,Hip Injury,IT Band Syndrome,Knee Injury,Muscle Pull,Plantar Fasciitis,Runners Knee		Accupuncture,Foam Rolling		Physiotherapist		No	No
EN	Europe		Republic of Ireland		Male		52	68	61-80%	3:01-3:15	27	28	0-10	It is a way of life,Keeping fit and healthy						Detractor	1	None of these		Pesco-vegetarian (includes fish)		Yes (positive test)	Elevated Heart rate,Forced to stop running for a period,Shortness of breath		40	Yes	Yes	Yes	Yes	Yes	Yes	Yes	Yes	Cushioned,Stability		Calories,Heart Rate Variability,Max HR,Resting HR,VO2MAX		Ankle Injury,Blisters,Chafing,Hip Injury,Knee Injury,Muscle Pull,Plantar Fasciitis		Compression,Elevation,Ice (Ice packs or cold compresses),Pain Relief,Rest,RICE (Rest Ice Compression Elevation),Support strapping,Stretching		Physiotherapist		Yes	No
EN	Europe		Republic of Ireland		Female		56	85	21-40%	3:31-3:45	44	26	0-10	It is a way of life,Keeping fit and healthy,Sense of accomplishment,Social life						Detractor	1	7 continents		Other (Please specify)	No	No			80	Yes	No	No	Yes	No	No			Stability		Steps		Plantar Fasciitis		Ice (Ice packs or cold compresses)		No I do not seek professional advise for running injuries		No	No
EN	North America	United States			Female		63	19	81-100%	3:46-4:00	50	52	0-10	Competition,Continuous performance improvement,It is a way of life,Keeping fit and healthy,Sense of accomplishment,Social life,To reach certain milestones,Total numbers,Travel,Others - Please specify	It’s fun					Detractor	5	Abbot Marathon Majors 6 stars,Marathon Maniacs		Vegetarian (excludes fish, poultry, and meat)		Probably yes (no positive test)	Forced to stop running for a period,Heart Palpitations,Muscle aches,Shortness of breath,Unusual fatigue		42	Yes	Yes	Yes	Yes	No	No	No		Light weight		Calories,Heart Rate Variability,Sleep,VO2MAX		Ankle Injury,Blisters,Chafing,Calf Injury,Hypothermia,IT Band Syndrome,Morton's Neuroma,Plantar Fasciitis,Runners Knee,Shin Splints,Stress Fracture,Tendonitus (Achilles tendinopathy)		Rest,Other - Please Specify	Strength training and core exercises	No I do not seek professional advise for running injuries		No	No
EN	Europe		Republic of Ireland		Female		44	68	0-20%	3:31-3:45	38	38	11-20	Continuous performance improvement,Keeping fit and healthy,Social life						Detractor	5	100 Marathon club UK milestones,MCI Ireland club milestones		Regular (including foods from all food groups)		Yes (positive test)	Shortness of breath		20	No	No	Yes	Yes	Yes	No		No	Cushioned,Stability		Calories,Steps		Ankle Injury,Chafing,Hip Injury,Knee Injury		Pain Relief,RICE (Rest Ice Compression Elevation),Stretching		Physiotherapist		Yes	Yes
EN	Europe		Republic of Ireland		Male		47	9	0-20%	3:01-3:15	37	37	0-10	Continuous performance improvement,It is a way of life,Keeping fit and healthy,Sense of accomplishment,Social life						Detractor	3	None of these		Regular (including foods from all food groups)		Yes (positive test)	Elevated Heart rate,Unusual fatigue		100	Yes	Yes	Yes	Yes	No	No	No		Stability		Calories,Heart Rate Variability,Max HR,Resting HR,Sleep,Stress,VO2MAX		Calf Injury,Hypothermia,IT Band Syndrome,Knee Injury,Muscle Pull,Plantar Fasciitis,Runners Knee,Shin Splints		Elevation,Foam Rolling,Ice (Ice packs or cold compresses),Rest,Stretching		Physiotherapist		No	No
EN	Europe		Republic of Ireland		Female		41	104	81-100%	4:31-4:45	31	32	11-20	Keeping fit and healthy,Social life,To reach certain milestones				Passive	8			100 Marathons from your national club		Regular (including foods from all food groups)		Yes (positive test)	None		30	No	No	Yes	Yes	Yes	No	No	Yes	Cushioned		Calories,Steps		Chafing,IT Band Syndrome,Shin Splints		Foam Rolling,Ice (Ice packs or cold compresses),Pain Relief,Rest,Stretching		Physiotherapist		Yes	No
EN
EN	Europe		Northern Ireland		Male		41	69	81-100%	3:46-4:00	38	31	11-20	Keeping fit and healthy,Sense of accomplishment,Social life,To reach certain milestones						Detractor	3	None of these		Regular (including foods from all food groups)		Yes (positive test)	Unusual fatigue		50	No	No	Yes	Yes	Yes	No	No	No	Cushioned		Sleep,Steps		Chafing,Plantar Fasciitis		RICE (Rest Ice Compression Elevation),Stretching		Physiotherapist		Yes	No
EN	North America	United States of America			Female		32	9	81-100%	4:46-5:00	23	25	0-10	Keeping fit and healthy,Sense of accomplishment,Travel						Detractor	0	Abbot Marathon Majors 6 stars		Regular (including foods from all food groups)		No			40	Yes	No	No	No	Yes			No	Cushioned,Stability		Calories,Steps		Blisters,Chafing,Heat Exhaustion,Hip Injury,IT Band Syndrome,Plantar Fasciitis,Shin Splints		Compression,Foam Rolling,Pain Relief,Rest,Stretching,Other - Please Specify	Myofascial massage	Another Medical Professional (e.g. Physician, A&E)		No	No
EN	Europe		Republic of Ireland		Male		52	119	41-60%	3:31-3:45	42	44	21-30	Sense of accomplishment,To reach certain milestones				Promoter	10	Detractor	0	None of these		Regular (including foods from all food groups)		No			60	No	No	No	Yes	No	No	No		Cushioned		None		Blisters,Chafing,Calf Injury,Muscle Pull		Compression,Foam Rolling,Rest		Physiotherapist		No	No
EN	Europe		Republic of Ireland		Female		52	6		3:46-4:00	47	47	0-10	Keeping fit and healthy,Sense of accomplishment						Detractor	0	None of these		Regular (including foods from all food groups)		No			50	No	No	Yes	Yes	No	Yes	No		Light weight		Max HR,Steps		IT Band Syndrome		Stretching		Physiotherapist		No	No
EN	Europe		Republic of Ireland		Male		58	26	81-100%	2:46-3:00	53	53	0-10	Sense of accomplishment,Others - Please specify	it is a way of socialising without having to overcommit. I enjoy the support and inclusion of the running community					Detractor	0	None of these		Other (Please specify)	I eat fish but no meat	Yes (positive test)	Forced to stop running for a period,Shortness of breath,Unusual fatigue		60	No	No	Yes	No	No				Cushioned,Other - Please specify	Mountain shoes for off road events and usually carbon plated runners (Nike vaporfly) for road	None		Morton's Neuroma		None		Another Medical Professional (e.g. Physician, A&E)		No	No
EN	Europe		Republic of Ireland		Male		53	88	0-20%	3:31-3:45	39	39	0-10	Keeping fit and healthy,Sense of accomplishment,Travel						Detractor	2	None of these		Regular (including foods from all food groups)		Yes (positive test)	Shortness of breath,Unusual fatigue		40	No	Yes	Yes	Yes	No	No	No		Cushioned,Light weight		None		Chafing,Calf Injury,Muscle Pull,Plantar Fasciitis,Other - Please specify	Inflamed Achilles, Hamstring strain	Compression,Foam Rolling,Rest,Stretching,Other - Please Specify	kinesiology tape	Physiotherapist		No	No
EN	Europe		Republic of Ireland		Male		48	6	81-100%	3:16-3:30	40	40	0-10	Continuous performance improvement,It is a way of life,Keeping fit and healthy,To reach certain milestones						Passive	8	None of these		Regular (including foods from all food groups)		Yes (positive test)	None		50	Yes	Yes	Yes	Yes	No	Yes	Yes		Cushioned,Stability,Light weight		Heart Rate Variability,Intensity minutes,Max HR,Resting HR,Sleep,Stress,VO2MAX		Ankle Injury,Blisters,Chafing,Calf Injury,Hip Injury,Knee Injury,Muscle Pull,Plantar Fasciitis,Runners Knee,Shin Splints
EN	Europe		Republic of Ireland		Female		46	15	21-40%	2:31-2:45	32	32	0-10	Competition,Continuous performance improvement,It is a way of life,Sense of accomplishment						Detractor	2	None of these		Regular (including foods from all food groups)		Yes (positive test)	None		90	Yes	No	Yes	Yes	No	No	No		Cushioned,Light weight		Intensity minutes		Blisters,Muscle Pull		Ice (Ice packs or cold compresses),Rest		Physiotherapist		No	No
EN	Australia/Oceania	New Zealand			Female		60	94	81-100%	3:31-3:45	31	31	11-20	Continuous performance improvement,It is a way of life,Keeping fit and healthy,Sense of accomplishment,Social life,Travel						Detractor	5	7 continents		Pesco-vegetarian (includes fish)		Yes (positive test)	None		80	Yes	No	No	Yes	Yes	No	No	No	Cushioned,Stability		Heart Rate Variability,Max HR,Resting HR,Sleep,Steps,VO2MAX		Chafing,Hypothermia,Runners Knee		Foam Rolling,RICE (Rest Ice Compression Elevation),Support strapping		Physiotherapist		No	No
EN	Europe		Republic of Ireland		Female		45	30	81-100%	2:46-3:00	28	28	0-10	Competition,Continuous performance improvement,It is a way of life,Keeping fit and healthy,Sense of accomplishment,Social life						Detractor	3	None of these		Regular (including foods from all food groups)		Yes (positive test)	Forced to stop running for a period,Muscle aches,Unusual fatigue		75	Yes	Yes	Yes	Yes	No	No	No		Light weight		Heart Rate Variability,Intensity minutes,Sleep		Chafing,Hip Injury		Accupuncture,Compression,Pain Relief,Stretching		Physiotherapist		Yes	No
EN	Australia/Oceania	New Zealand			Female		62	255	0-20%	3:16-3:30	31	32	0-10	Keeping fit and healthy				Detractor	3	Detractor	1	100 Marathons from your national club		Pesco-vegetarian (includes fish)		No			60	No	No	Yes	No	No				Stability		None		Ankle Injury,Blisters,Heat Exhaustion,Runners Knee		Rest,Stretching		Physiotherapist		No	No
EN
EN	Europe		Other European Country	Finland	Male		58	100	81-100%	3:01-3:15	22	39	0-10	Keeping fit and healthy,To reach certain milestones				Passive	7	Detractor	5	100 Marathons from your national club		Regular (including foods from all food groups)		Probably yes (no positive test)	Shortness of breath,Unusual fatigue		70	No	No	Yes	Yes	No	Yes	No		Cushioned,Light weight		Resting HR,Sleep		Blisters,Frostbite,Muscle Pull,Plantar Fasciitis,Tendonitus (Achilles tendinopathy)		Foam Rolling,Rest,Stretching		No I do not seek professional advise for running injuries		No	No
EN	Europe		Other European Country	Finland	Male		70	1000	81-100%	3:01-3:15	17	19	0-10	Continuous performance improvement,It is a way of life,Keeping fit and healthy,Multi Marahon Series (e.g. 10 in 10 days),To reach certain milestones,Others - Please specify	At least one marathon in a year, so far since 1973 I have completed this goal, 50 years in a row and "Seinämarathon" since the start of the run 1973 until 2022 every year, also Covid years.	Other - Please specify	at least one marathon in a year, so far 50 years, which is record at least in Finland			Detractor	3	100 Marathons from your national club		Other (Please specify)	No Diet!	No			55	No	No	No	Yes	No	No	No		Cushioned		Heart Rate Variability,Pulse Ox,Sleep		None		Rest,Stretching		Physiotherapist,Another Medical Professional (e.g. Physician, A&E)		No	No
EN	Europe		Other European Country	FINLAND	Male		52	345	81-100%	3:16-3:30	45	45	>51	Total numbers				Promoter	10	Detractor	2	100 Marathons from your national club,World Mega Marathon ranking 300+		Regular (including foods from all food groups)		No			150	No	No	No	Yes	Yes	No		Yes	Stability		Calories,Heart Rate Variability,Floors,Intensity minutes,Max HR,Pulse Ox,Respiration,Resting HR,Sleep,Steps,Stress,VO2MAX		None		None		No I do not seek professional advise for running injuries
EN	Europe		Other European Country	Finland	Female		43	59	81-100%	4:31-4:45	37	37	11-20	It is a way of life,Keeping fit and healthy,Social life,Travel						Promoter	9	100 Marathons from your national club,Marathon Globetrotters		Regular (including foods from all food groups)		No			40	Yes	No	Yes	Yes	Yes	Yes	No	No	Cushioned		Heart Rate Variability,Max HR,Resting HR,Stress,VO2MAX		Blisters,Heat Exhaustion,Shin Splints		Accupuncture,Compression,Stretching		Another Medical Professional (e.g. Physician, A&E)		No	No
EN
EN	Europe		England		Male		63	81	81-100%	3:31-3:45	38	38	0-10	Competition,Continuous performance improvement,Keeping fit and healthy,Travel						Passive	7	Abbot Marathon Majors 6 stars		Regular (including foods from all food groups)		No			50	Yes	Yes	Yes	Yes	No	No	No		Other - Please specify	Carbon based shoes	Calories,Intensity minutes,VO2MAX		Blisters,Knee Injury,Muscle Pull		Accupuncture,Stretching		Physiotherapist		No	No
EN	North America	United States			Female		71	312	81-100%	4:46-5:00	48	49	21-30	It is a way of life,Keeping fit and healthy,Multi Marahon Series (e.g. 10 in 10 days),Sense of accomplishment,To reach certain milestones,Total numbers,Travel		10 in 10 days,Back to Back		Promoter	10	Detractor	5	7 continents,50 US states,100 Marathons from your national club,Abbot Marathon Majors 6 stars,Marathon Globetrotters,Marathon Maniacs,Mega Marathons,World Mega Marathon ranking 300+		Pesco-vegetarian (includes fish)		No			75	No	No	Yes	Yes	Yes	No	No	No	Light weight		Heart Rate Variability,Floors,Intensity minutes,Max HR,Resting HR,Sleep,Steps		Blisters,Chafing,Other - Please specify	Proximal Hamstring tear	Other - Please Specify	Physical therapy	Physiotherapist		No	No
EN	Europe		Republic of Ireland		Male		56	125	81-100%	4:01-4:15	36	36	11-20	Continuous performance improvement,It is a way of life,Keeping fit and healthy,Sense of accomplishment,To reach certain milestones				Promoter	10			MCI Ireland club milestones		Regular (including foods from all food groups)		Yes (positive test)	Forced to stop running for a period,Unusual fatigue		70	No	No	No	Yes	Yes	No		No	Cushioned		Calories,Resting HR,Sleep,Steps,Stress		Other - Please specify	Groin problem	Rest		Physiotherapist		No	No
EN	Europe		Northern Ireland		Female		48	243	41-60%	3:16-3:30	31	31	31-40	It is a way of life,Keeping fit and healthy,Multi Marahon Series (e.g. 10 in 10 days),Sense of accomplishment,Social life,Travel		10 in 10 days,Back to Back		Promoter	10			None of these		Vegetarian (excludes fish, poultry, and meat)		Yes (positive test)	None		112	No	No	Yes	Yes	Yes	No		No	Cushioned		None		Ankle Injury,Blisters,Chafing,Hip Injury,IT Band Syndrome,Muscle Pull,Plantar Fasciitis,Shin Splints		Pain Relief,Stretching		No I do not seek professional advise for running injuries		Yes	Yes
EN	Europe		Other European Country	Estonia	Male		48	106		3:31-3:45
EN	Europe		Other European Country	Estonia	Male		31	23	81-100%	3:46-4:00
EN	Europe		Republic of Ireland		Male		71	133	0-20%	3:16-3:30	30	30	0-10	It is a way of life				Detractor	1	Detractor	1	None of these		Other (Please specify)	just careful what I eat	No			60	No	Yes	No	No	No				Motion Control (made to support heavy weight, flat feet or severe overpronation)		Calories,Sleep		Knee Injury		Accupuncture,Ice (Ice packs or cold compresses)		Physiotherapist		No	No
EN	North America	United States			Male		43	257
EN
EN	Europe		Other European Country	Finland	Female		56	343	81-100%	3:46-4:00	42	42	>51	It is a way of life,Keeping fit and healthy,Social life				Promoter	10	Passive	8	100 Marathons from your national club,World Mega Marathon ranking 300+,Other - Please specify	Kauhajoki Ultra running festival (Finland); 6 marathons in 6 days	Regular (including foods from all food groups)		Yes (positive test)	Shortness of breath,Unusual fatigue		45	No	No	Yes	Yes	Yes	No	No	No	Cushioned		Calories,Heart Rate Variability,Floors,Intensity minutes,Max HR,Pulse Ox,Respiration,Resting HR,Sleep,Steps,Stress,VO2MAX		Blisters,Heat Exhaustion,Stress Fracture		Pain Relief,Rest,RICE (Rest Ice Compression Elevation),Support strapping,Stretching,Other - Please Specify	massage	Another Medical Professional (e.g. Physician, A&E)		No	No
EN	Europe		Other European Country	Finland	Male		69	1027	81-100%	3:01-3:15	49	49	>51	Keeping fit and healthy,Social life,Total numbers						Promoter	9	100 Marathons from your national club,World Mega Marathon ranking 300+,Other - Please specify	Kauhajoki Ultra Running Festival	Regular (including foods from all food groups)		Yes (positive test)	None		43	No	No	Yes	Yes	Yes	No	No	No	Cushioned		Calories,Heart Rate Variability,Steps		Calf Injury,Knee Injury,Plantar Fasciitis,Runners Knee,Stress Fracture		Other - Please Specify	Massage	No I do not seek professional advise for running injuries		No	No
EN	Europe		Other European Country	Finland	Male		53	143	81-100%	3:01-3:15	24	25	0-10	It is a way of life,Keeping fit and healthy,Sense of accomplishment,Social life,Travel				Promoter	10	Detractor	5	None of these		Vegetarian (excludes fish, poultry, and meat)		Yes (positive test)	Unusual fatigue		60	No	No	No	Yes	No	No			Light weight		Steps		Ankle Injury,Blisters,Chafing,Calf Injury,Hip Injury,IT Band Syndrome,Knee Injury,Muscle Pull,Runners Knee,Shin Splints,Tendonitus (Achilles tendinopathy)		Ice (Ice packs or cold compresses),Rest,Other - Please Specify	Massage and fysiotheraphy And sauna	Physiotherapist		No	No
EN	Europe		Other European Country	Finland	Female		61	1142	81-100%	3:31-3:45	43	43	>51	It is a way of life,Keeping fit and healthy						Detractor	2	100 Marathons from your national club,World Mega Marathon ranking 300+		Regular (including foods from all food groups)		Yes (positive test)	None		85	No	Yes	Yes	Yes	Yes	Yes	No	No	Cushioned		Sleep,Steps		Muscle Pull,Stress Fracture		Compression,Foam Rolling,Rest,Stretching,Other - Please Specify	Faskia treatment	Physiotherapist,Another Medical Professional (e.g. Physician, A&E),Specialist or other- Please detail here:		No	No
EN	Europe		Republic of Ireland		Male		58	43	0-20%	3:46-4:00	18	18	0-10	It is a way of life,Keeping fit and healthy,Sense of accomplishment,Social life,To reach certain milestones,Travel						Detractor	4	MCI Ireland club milestones		Regular (including foods from all food groups)		Yes (positive test)	Unusual fatigue		40	Yes	Yes	Yes	Yes	No	No			Cushioned,Stability		Calories		None		Compression,Rest,Stretching		Physiotherapist,Specialist or other- Please detail here:	Physical Therapist	No	No
EN	Europe		Other European Country	Finland	Male		65	169	81-100%	3:46-4:00	49	54	21-30	Keeping fit and healthy,Sense of accomplishment,Social life,To reach certain milestones,Total numbers				Passive	7	Passive	7	100 Marathons from your national club		Regular (including foods from all food groups)		Yes (positive test)	Elevated Heart rate,Forced to stop running for a period,Unusual fatigue		60	No	No	No	Yes	No	Yes	No		Cushioned,Stability		Calories,Heart Rate Variability,Max HR,Resting HR,Sleep,Steps,VO2MAX		Ankle Injury,Blisters,Runners Knee		Compression,Rest,Stretching		Physiotherapist		No	No
EN	Europe		Other European Country	Finland	Female		69	292	81-100%	3:31-3:45	35	35	11-20	It is a way of life,Keeping fit and healthy,Social life,Travel				Promoter	10	Promoter	9	100 Marathons from your national club		Regular (including foods from all food groups)		No			60	Yes	Yes	No	Yes	Yes	Yes	No	Yes	Cushioned		Calories,Heart Rate Variability,Intensity minutes,Max HR,Steps,VO2MAX		Blisters		Compression,Elevation,Foam Rolling,Ice (Ice packs or cold compresses),Stretching		Physiotherapist,Specialist or other- Please detail here:		Yes	No
EN	Europe		Other European Country	Finland	Male		54	104	81-100%	3:01-3:15	49	51	21-30	It is a way of life,Keeping fit and healthy,Social life				Passive	7	Detractor	2	100 Marathons from your national club		Regular (including foods from all food groups)		Yes (positive test)	Unusual fatigue		80	No	No	No	Yes	No	Yes	No		Stability		Max HR,Sleep,VO2MAX		Ankle Injury,Blisters,Plantar Fasciitis,Tendonitus (Achilles tendinopathy)		Foam Rolling,Stretching		Physiotherapist		No	No
EN	Europe		Republic of Ireland		Male		57	96	0-20%	3:01-3:15	33	32	0-10	Keeping fit and healthy,Sense of accomplishment,Social life,Travel						Detractor	0	None of these		Regular (including foods from all food groups)		Yes (positive test)	None		50	No	No	Yes	Yes	Yes	No	No	Yes	Cushioned		None		Ankle Injury,Knee Injury,Stress Fracture		Elevation,Ice (Ice packs or cold compresses),Pain Relief,Rest		Physiotherapist,Specialist or other- Please detail here:	Physical Therapist	Yes	No
EN	Europe		Other European Country	Finland	Male		72	228	81-100%	3:46-4:00	52	52	11-20	Keeping fit and healthy				Passive	8	Detractor	6	100 Marathons from your national club		Regular (including foods from all food groups)		No			10	No	No	No	No	No				Light weight		None		Plantar Fasciitis		Compression		Physiotherapist		No	Yes
EN	Europe		Republic of Ireland		Male		49	16	81-100%	3:46-4:00	36	38	0-10	It is a way of life						Detractor	6
EN	North America	USA			Male		69	100	81-100%	2:46-3:00	18	18	0-10	Keeping fit and healthy				Detractor	0			None of these		Regular (including foods from all food groups)		Yes (positive test)	None		45	No	No	No	Yes	Yes	Yes		No	Stability		Heart Rate Variability,Max HR,Resting HR		Ankle Injury,Blisters,Chafing,Calf Injury,IT Band Syndrome,Knee Injury,Muscle Pull,Plantar Fasciitis,Shin Splints		Ice (Ice packs or cold compresses),Pain Relief,Rest,Stretching,Other - Please Specify	Rehabilitation therapy, strengthening, & massage.	Specialist or other- Please detail here:	Neurokinetic diagnosis & therapy	Yes	No
EN	Europe		Republic of Ireland		Male		44	5		4:16-4:30		31	0-10	It is a way of life,Keeping fit and healthy,To reach certain milestones						Detractor	1	None of these		Other (Please specify)	I don't follow any particular diet. I watch my food intake, but do not restrict any foods.	Yes (positive test)	Shortness of breath		50	No	Yes	No	Yes	Yes	No		Yes	Cushioned		Heart Rate Variability,Intensity minutes,Max HR,Sleep,Steps,VO2MAX		None		Ice (Ice packs or cold compresses),Rest,Stretching		Physiotherapist		No	No
EN	Europe		Republic of Ireland		Female		62	74	81-100%	3:46-4:00
EN	Europe		Republic of Ireland		Male		43	1	0-20%	2:31-2:45	13	26	0-10	Total numbers						Detractor	0	Other - Please specify		Regular (including foods from all food groups)		Yes (positive test)	Unusual fatigue		50	No	No	No	No	No				Cushioned		None		Tendonitus (Achilles tendinopathy)		Support strapping		Specialist or other- Please detail here:		No	No
EN	North America	USA			Male		74	27	81-100%	3:16-3:30
EN	Europe		Republic of Ireland		Female		45	28	81-100%	3:46-4:00
EN	Europe		England		Male		64	1840		3:31-3:45
EN	Europe		Northern Ireland		Male		50	29	81-100%	2:46-3:00	44	45	0-10	Continuous performance improvement,It is a way of life,Keeping fit and healthy,Sense of accomplishment,Social life						Detractor	5	Abbot Marathon Majors 6 stars		Regular (including foods from all food groups)		Yes (positive test)	Elevated Heart rate		100	Yes	Yes	Yes	Yes	Yes	No	No	No	Cushioned,Light weight		Calories,Heart Rate Variability,Resting HR,Sleep,Steps,VO2MAX		Chafing,Calf Injury,Plantar Fasciitis,Stress Fracture		Ice (Ice packs or cold compresses),Pain Relief,Rest		Physiotherapist		No	No
EN	Europe		Other European Country	Finland	Male		65	277	81-100%	3:01-3:15	49	49	31-40	It is a way of life,Keeping fit and healthy,Social life,Total numbers				Promoter	10	Passive	8	100 Marathons from your national club		Prefer not to say		Yes (positive test)	None		70	No	No	No	Yes	No	No	No		Stability		None		Calf Injury,Hip Injury,Plantar Fasciitis,Tendonitus (Achilles tendinopathy)		Ice (Ice packs or cold compresses),Rest,Stretching		Physiotherapist		No	No
EN	Europe		Republic of Ireland		Male		48	77	61-80%	2:31-2:45	40	40	11-20	Competition,Keeping fit and healthy,Sense of accomplishment,Travel						Detractor	4	100 Marathons from your national club,MCI Ireland club milestones		Regular (including foods from all food groups)		Probably yes (no positive test)	Unusual fatigue
EN	Europe		Republic of Ireland		Male		58	282	0-20%	3:31-3:45	42	42	11-20	Keeping fit and healthy,To reach certain milestones,Travel				Passive	8			100 Marathon club UK milestones,MCI Ireland club milestones		Regular (including foods from all food groups)		Yes (positive test)	None
EN	Europe		Northern Ireland		Male		40	13	81-100%	3:31-3:45	31	32	0-10	Continuous performance improvement,Keeping fit and healthy,Sense of accomplishment						Detractor	4	None of these		Regular (including foods from all food groups)		Yes (positive test)	None		40	Yes	Yes	No	Yes	No	No	Yes		Cushioned,Stability,Light weight		Intensity minutes,Max HR,Resting HR,Sleep,Steps,Stress,VO2MAX		Chafing,Runners Knee,Shin Splints,Stress Fracture		Rest		No I do not seek professional advise for running injuries		No	No
EN	Europe		Republic of Ireland		Female		48	272	61-80%	4:16-4:30	23	23	21-30	Continuous performance improvement,It is a way of life,Keeping fit and healthy,Sense of accomplishment,Social life,To reach certain milestones,Total numbers,Travel				Detractor	6			100 Marathons from your national club		Regular (including foods from all food groups)		Yes (positive test)	Muscle aches,Shortness of breath,Unusual fatigue		80	No	Yes	No	Yes	Yes	No		No	Motion Control (made to support heavy weight, flat feet or severe overpronation),Light weight		Max HR,VO2MAX		Chafing,Tendonitus (Achilles tendinopathy)		Pain Relief,RICE (Rest Ice Compression Elevation)		Physiotherapist		Yes	No
EN	Europe		Republic of Ireland		Male		46	72	81-100%	3:16-3:30	40	40	11-20	Keeping fit and healthy,Social life,Travel						Detractor	3	MCI Ireland club milestones		Regular (including foods from all food groups)		Yes (positive test)	Elevated Heart rate,Unusual fatigue		55	No	No	No	Yes	No	Yes			Cushioned,Stability,Light weight		Resting HR,Sleep,Steps,Stress,VO2MAX		Stress Fracture		Compression,Rest		Physiotherapist		No	No
EN	Europe		Republic of Ireland		Female		48	66	81-100%	3:46-4:00	39	39	11-20	It is a way of life,Keeping fit and healthy,Social life,To reach certain milestones						Passive	7	MCI Ireland club milestones		Regular (including foods from all food groups)		No			40	No	No	No	Yes	No	Yes	Yes		Cushioned		Heart Rate Variability,Max HR,Resting HR,Sleep,Steps,Stress,VO2MAX		Ankle Injury,Blisters,Chafing,IT Band Syndrome,Tendonitus (Achilles tendinopathy)		Compression,Ice (Ice packs or cold compresses),Rest,Stretching,Other - Please Specify	Sports massage Dry needling	Physiotherapist		No	No
EN	Europe		Republic of Ireland		Male		45	11	0-20%	2:46-3:00	30	31	0-10	Keeping fit and healthy,Sense of accomplishment,Social life						Passive	7	None of these		Prefer not to say		No			40	Yes	Yes	Yes	Yes	Yes	No	No	No	Cushioned		Calories,Floors,Intensity minutes,Resting HR,Steps,VO2MAX		Ankle Injury,Blisters,Chafing,Calf Injury,Knee Injury,Muscle Pull,Plantar Fasciitis		Compression,Elevation,Foam Rolling,Ice (Ice packs or cold compresses),Pain Relief,Rest,RICE (Rest Ice Compression Elevation),Support strapping,Stretching		Physiotherapist		Yes	No
EN	Australia/Oceania	Australia			Male		64	28	0-20%	3:31-3:45	60	58	0-10	Competition,Keeping fit and healthy,Sense of accomplishment,Social life						Detractor	5	None of these		Regular (including foods from all food groups)		Yes (positive test)	None		70	No	No	No	Yes	Yes	No		Yes	Cushioned		None		Knee Injury,Plantar Fasciitis,Runners Knee,Shin Splints		Compression,Ice (Ice packs or cold compresses),Pain Relief,Rest,RICE (Rest Ice Compression Elevation),Surgery		Physiotherapist,Another Medical Professional (e.g. Physician, A&E),Specialist or other- Please detail here:		No	No
EN
EN	Europe		England		Female		50	6		5:31-5:45	28	28	0-10	Sense of accomplishment						Detractor	5	None of these		Prefer not to say		No			30	No	No	Yes	Yes	Yes	No	No	No	Cushioned		None		None		None		No I do not seek professional advise for running injuries		No	No
EN	Europe		England		Female		34	18	21-40%	5:01-5:15	32	33	21-30	It is a way of life,Keeping fit and healthy,Sense of accomplishment,Social life,To reach certain milestones,Total numbers						Detractor	0	Mega Marathons		Regular (including foods from all food groups)		Yes (positive test)	Shortness of breath,Unusual fatigue		55	No	Yes	No	Yes	Yes	Yes	No	Yes	Stability		Heart Rate Variability,Max HR,Resting HR,Sleep,Steps,VO2MAX		Chafing,Calf Injury,IT Band Syndrome,Shin Splints,Stress Fracture,Other - Please specify	Posterior chain weakness after hamstring injury	Accupuncture,Compression,Foam Rolling,Stretching		Physiotherapist		No	No
EN	Europe		England		Female		48	75	61-80%	4:46-5:00	37	38	11-20	Sense of accomplishment						Detractor	2			Regular (including foods from all food groups)		No			70	Yes	No	No	Yes	No	Yes	No		Cushioned		Calories,Heart Rate Variability,Floors,Resting HR,Sleep,Steps,Stress,VO2MAX		Blisters,Plantar Fasciitis,Runners Knee		Rest		No I do not seek professional advise for running injuries		No	No
EN	Europe		England		Male		58	193	81-100%	3:46-4:00	25	29	11-20	Keeping fit and healthy,Sense of accomplishment,Social life,To reach certain milestones,Travel				Detractor	6	Detractor	5	100 Marathon club UK milestones,Mega Marathons		Regular (including foods from all food groups)		No			80	No	Yes	Yes	Yes	No	No	No		Motion Control (made to support heavy weight, flat feet or severe overpronation)		None		Blisters,Chafing,Calf Injury,Plantar Fasciitis,Shin Splints,Tendonitus (Achilles tendinopathy)		Compression,Elevation,Foam Rolling,Ice (Ice packs or cold compresses),Pain Relief,RICE (Rest Ice Compression Elevation),Support strapping,Stretching		No I do not seek professional advise for running injuries		Yes	No
EN	Europe		England		Female		38	24	21-40%	3:31-3:45	34	34	0-10	Continuous performance improvement,It is a way of life,Keeping fit and healthy,Sense of accomplishment						Detractor	2	None of these		Vegetarian (excludes fish, poultry, and meat)		Yes (positive test)	None		110	No	Yes	No	Yes	Yes	No		Yes	Light weight		Calories,Resting HR,Steps		Knee Injury		Rest,Stretching		Physiotherapist,Specialist or other- Please detail here:	Osteopath	No	No
EN	Europe		England		Female		60	820	61-80%	3:31-3:45	46	48	>51	It is a way of life,Keeping fit and healthy,Multi Marahon Series (e.g. 10 in 10 days),Sense of accomplishment		5 in 5 days,10 in 10 days,12 in 12 months,52 in 52 weeks,100 in 100 weeks,Other - Please specify	500 in 500	Detractor	4			World Mega Marathon ranking 300+		Pesco-vegetarian (includes fish)		Probably yes (no positive test)	Shortness of breath,Unusual fatigue		100	No	No	No	Yes	No	No			Cushioned		None		Muscle Pull		Pain Relief,Support strapping,Stretching		No I do not seek professional advise for running injuries		Yes	No
EN	Europe		England		Female		51	97	41-60%	3:46-4:00	48	48	31-40	Continuous performance improvement,Keeping fit and healthy,Multi Marahon Series (e.g. 10 in 10 days),To reach certain milestones		10 in 10 days,52 in 52 weeks,100 in 100 weeks,Back to Back				Passive	7	100 Marathon club UK milestones,Abbot Marathon Majors 6 stars,Mega Marathons		Regular (including foods from all food groups)		Probably yes (no positive test)	None		65	No	No	No	Yes	No	Yes	No		Cushioned		Calories,Intensity minutes,Steps,VO2MAX		Plantar Fasciitis		Accupuncture,RICE (Rest Ice Compression Elevation)		Physiotherapist		No	No
EN	Europe		England		Female		54	48	81-100%	5:31-5:45	41	51	11-20	Continuous performance improvement,Keeping fit and healthy,Sense of accomplishment,Social life						Detractor	0	Global Marathon challenges,Mega Marathons,Other - Please specify	100 Half Marathon Club UK	Regular (including foods from all food groups)		Yes (positive test)	Muscle aches,Shortness of breath,Unusual fatigue		45	No	No	No	Yes	Yes	No	Yes	Yes	Cushioned,Stability		Steps		Ankle Injury,Blisters,Plantar Fasciitis,Tendonitus (Achilles tendinopathy)		Compression,Support strapping,Stretching,Other - Please Specify	Sports Massage	Specialist or other- Please detail here:	Sports Rehab Therapist	No	No
EN	Europe		England		Male		59	174	81-100%	3:31-3:45	39	39	11-20	It is a way of life,Keeping fit and healthy,Sense of accomplishment,To reach certain milestones,Travel				Promoter	9	Promoter	9	100 Marathon club UK milestones,Abbot Marathon Majors 6 stars,Global Marathon challenges,Mega Marathons		Regular (including foods from all food groups)		Yes (positive test)	None		35	No	Yes	No	Yes	Yes	No	No	No	Stability		Intensity minutes,Sleep,Steps,Stress		Chafing,Knee Injury,Muscle Pull		Compression,Foam Rolling,Ice (Ice packs or cold compresses),Stretching,Surgery		Physiotherapist,Specialist or other- Please detail here:	Knee surgeon	No	Yes
EN	Europe		England		Female		43	13	61-80%	5:16-5:30	38	40	0-10	Awards,Multi Marahon Series (e.g. 10 in 10 days),Sense of accomplishment,To reach certain milestones,Travel		10 in 10 days,52 in 52 weeks				Detractor	6	Mega Marathons		Regular (including foods from all food groups)		Yes (positive test)	Forced to stop running for a period,Shortness of breath,Unusual fatigue		50	No	No	No	Yes	No	No	No		Cushioned		Calories,Heart Rate Variability,Floors,Intensity minutes,Max HR,Respiration,Resting HR,Sleep,Steps,Stress		Blisters,Chafing,Heat Exhaustion,Muscle Pull,Plantar Fasciitis,Shin Splints		Compression,Elevation,Foam Rolling,Ice (Ice packs or cold compresses),Pain Relief,Rest,RICE (Rest Ice Compression Elevation),Stretching,Other - Please Specify	Massage	No I do not seek professional advise for running injuries		No	No
EN	Europe		Scotland		Female		43	5	81-100%	5:16-5:30	24	26	0-10	Keeping fit and healthy,Sense of accomplishment,Social life,To reach certain milestones,Others - Please specify	For the medals					Passive	8	Other - Please specify	Last Man Standing; SVN events	Regular (including foods from all food groups)		No			50	Yes	No	Yes	Yes	Yes	Yes	No	Yes	Cushioned,Stability,Light weight,Other - Please specify	During winter trails shoes due to the area where I live and the surface I run on.	Calories,Heart Rate Variability,Floors,Intensity minutes,Max HR,Resting HR,Sleep,Steps,Stress		Blisters,Chafing,Calf Injury,Heat Exhaustion,Hip Injury,IT Band Syndrome,Muscle Pull,Shin Splints		Compression,Foam Rolling,RICE (Rest Ice Compression Elevation),Support strapping,Stretching,Other - Please Specify	Post event massage; Keep moving after an event	Physiotherapist		No	No
EN	Europe		Wales		Female		54	8	0-20%	>6:00	45	41	0-10	Awards,Keeping fit and healthy,Sense of accomplishment						Promoter	10	Mega Marathons		Vegan		Yes (positive test)	Elevated Heart rate,Forced to stop running for a period,Heart Palpitations,Muscle aches,Shortness of breath,Unusual fatigue		40	No	No	Yes	Yes	Yes	Yes	No	Yes	Cushioned,Motion Control (made to support heavy weight, flat feet or severe overpronation),Stability		Calories,Heart Rate Variability,Floors,Intensity minutes,Max HR,Resting HR,Sleep,Steps		Blisters,Chafing,Calf Injury,Heat Exhaustion,Hip Injury,Shin Splints,Other - Please specify	Herniated disc	Accupuncture,Foam Rolling,Ice (Ice packs or cold compresses),Pain Relief,Rest,Other - Please Specify	Root nerve block	Physiotherapist,Specialist or other- Please detail here:	Consultant orthopaedics	No	No
EN	Europe		England		Male		52	38	81-100%	3:46-4:00	38	38	11-20	It is a way of life,Keeping fit and healthy,Sense of accomplishment,Social life,To reach certain milestones,Total numbers,Travel						Passive	8	100 Marathon club UK milestones		Pesco-vegetarian (includes fish)		No			64	No	Yes	No	Yes	Yes	No	No	Yes	Cushioned		None		Ankle Injury,Blisters,Hip Injury,Runners Knee,Shin Splints,Tendonitus (Achilles tendinopathy)		Rest		Physiotherapist,Another Medical Professional (e.g. Physician, A&E)		No	No
EN
EN	Europe		England		Female		48	44	81-100%	4:01-4:15	22	24	0-10	It is a way of life,Keeping fit and healthy,Sense of accomplishment						Detractor	6	Mega Marathons		Regular (including foods from all food groups)		Yes (positive test)	None		65	No	No	No	Yes	No	No	No		Cushioned		Calories,Heart Rate Variability,Intensity minutes,Resting HR,Sleep,Steps,Stress,VO2MAX		Calf Injury		Foam Rolling,Rest,Stretching		No I do not seek professional advise for running injuries		No	Yes
EN	Europe		England		Female		49	85	81-100%	3:46-4:00	32	32	0-10	Keeping fit and healthy,Sense of accomplishment,Social life,Others - Please specify	Support mental health					Detractor	5	Marathon Maniacs,Mega Marathons		Regular (including foods from all food groups)		Yes (positive test)	None		25	No	No	No	Yes	No	No	No		Cushioned		Steps,Other - Please Specify	I regularly check steps and occasionally look at HR, floors, V02 etc	Blisters,Chafing,Plantar Fasciitis,Other - Please specify	General muscle issues, but addressed with massage so I consider annoying rather than injury.	Other - Please Specify	Massage	Physiotherapist,Specialist or other- Please detail here:	Massage therapist- for prevention as well as cure	No	No
EN	Europe		England		Male		42	194	41-60%	3:16-3:30	35	36	11-20	Continuous performance improvement,Keeping fit and healthy,Sense of accomplishment,To reach certain milestones				Passive	8	Detractor	6	100 Marathon club UK milestones,Mega Marathons		Regular (including foods from all food groups)		Yes (positive test)	None		60	Yes	No	Yes	Yes	No	No	No		Light weight		Heart Rate Variability,Max HR,Resting HR,Steps,VO2MAX		Ankle Injury,Muscle Pull,Plantar Fasciitis		Compression,Foam Rolling,Rest,Support strapping,Stretching		Physiotherapist		No	No
EN	Europe		England		Female		45	60		4:01-4:15	17	19	0-10	It is a way of life,Keeping fit and healthy,Sense of accomplishment						Detractor	0	None of these		Pesco-vegetarian (includes fish)		Yes (positive test)	None		50	No	No	No	No	Yes			No	Motion Control (made to support heavy weight, flat feet or severe overpronation)		None		None		None		Specialist or other- Please detail here:	I'm a Physiotherapist, I don't specialise in MSK but know enough to get by!	No	No
EN	Europe		England		Female		57	27	0-20%	4:31-4:45	49	49	0-10	Continuous performance improvement,Keeping fit and healthy,Multi Marahon Series (e.g. 10 in 10 days),Sense of accomplishment		10 in 10 days				Detractor	1	None of these		Vegan		Yes (positive test)	Unusual fatigue		50	Yes	Yes	No	Yes	Yes	Yes	No	Yes	Cushioned,Light weight		Calories,Heart Rate Variability,Intensity minutes,Max HR,Resting HR,Sleep,Steps,Stress,VO2MAX		Ankle Injury,Blisters,Chafing,Calf Injury,IT Band Syndrome,Knee Injury,Muscle Pull,Stress Fracture,Tendonitus (Achilles tendinopathy)		Foam Rolling,Ice (Ice packs or cold compresses),Rest,RICE (Rest Ice Compression Elevation),Support strapping,Stretching,Surgery		Physiotherapist,Another Medical Professional (e.g. Physician, A&E),Specialist or other- Please detail here:	Sports therapist	No	No
EN	Europe		England		Male		54	67	0-20%	4:31-4:45	49	49	11-20	Keeping fit and healthy,Multi Marahon Series (e.g. 10 in 10 days),Running streaks,Sense of accomplishment,Social life		10 in 10 days				Detractor	6	100 Marathon club UK milestones,Global Marathon challenges,Mega Marathons		Regular (including foods from all food groups)		Yes (positive test)	None		118	No	No	Yes	Yes	No	No	No		Cushioned,Light weight		Calories,Heart Rate Variability,Resting HR,Sleep,Steps,VO2MAX		Chafing,Shin Splints		None		No I do not seek professional advise for running injuries		No	No
EN	Europe		England		Female		65	135	41-60%	4:31-4:45	58	58	11-20	Sense of accomplishment						Passive	7	100 Marathon club UK milestones,Mega Marathons		Vegetarian (excludes fish, poultry, and meat)		Yes (positive test)	Shortness of breath		35	No	No	No	Yes	Yes	No		No	Stability		Steps		Other - Please specify	Foot pain awaiting to see podiatrist	Elevation,Ice (Ice packs or cold compresses),Pain Relief		Specialist or other- Please detail here:	Podiatrist	Yes	No
EN	Europe		England		Female		36	11	0-20%	>6:00	30		0-10	It is a way of life,Keeping fit and healthy,Sense of accomplishment,Others - Please specify	Winter training for a spring marathon keeps me motivated and mentally well through the winter					Detractor	4	None of these		Regular (including foods from all food groups)		Yes (positive test)	Forced to stop running for a period,Muscle aches,Unusual fatigue		30	No	No	No	Yes	Yes	No	No	Yes	Cushioned,Stability		Heart Rate Variability,Intensity minutes,Resting HR,Steps,Stress,VO2MAX		Blisters,Chafing,Plantar Fasciitis,Stress Fracture		Foam Rolling,RICE (Rest Ice Compression Elevation)		Physiotherapist		No	No
EN	Europe		England		Female		49	30	61-80%	4:31-4:45	43	44	11-20	Awards,Sense of accomplishment,To reach certain milestones						Detractor	5	100 Marathon club UK milestones,Abbot Marathon Majors 6 stars,Global Marathon challenges,Mega Marathons,Triple crown of Ultras (Comrades, Western States, UTMB)		Regular (including foods from all food groups)		Yes (positive test)	Elevated Heart rate,Forced to stop running for a period,Heart Palpitations,Muscle aches,Shortness of breath,Unusual fatigue		50	No	Yes	No	Yes	Yes	No	No		Cushioned,Light weight		Heart Rate Variability,Floors,Intensity minutes,Max HR,Resting HR,Sleep,Steps,Stress,VO2MAX		Chafing,Hip Injury,Stress Fracture		Rest,Stretching,Other - Please Specify	I have a TENS machine	Physiotherapist,Another Medical Professional (e.g. Physician, A&E)		No	No
[truncated: 115 more rows]
[truncated: 9 more columns]

## Sheet: Sheet1
Age
What age are you? Please type in your age.
56
58
59
52
54
58
74
65
71
55
55
51
55
51
42
57
55
57
56
55
46
59
57
60
59
57
47
37
40
59
25
47
59
41
48
49
41
48
46
43
40
50
60
51
61
53
58
51
60
51
50
50
40
54
58
34
40
65
35
34
33
64
49
52
42
35
42
53
33
42
58
48
48
51
52
49
41
48
53
62
51
41
50
46
30
46
39
53
64
51
31
54
38
49
48
40
58
56
64
63
47
57
49
59
47
54
53
62
[truncated: 234 more rows]
