# Supplementary material for: How Participation, Physiology, Psychology, and Cognition Interact in Multi- Marathon Runners: Insights from a Harmonised Cross-Sectional Analysis
Source: Research Square preprint supplement (doi:10.21203/rs.3.rs-7392979/v1), 2025-12-29
Supplement: Supplementary file 3 [file 8ede7efea02b030a5bfd9360.xlsx]

## Sheet: Sheet 1
Age	Gender	Marathon	Education	MMSE	ommission	commission	mean_rt	sd_rt	cognitive_response_time	motor_response_time
52	1	180	3	29	6	3	0.31	0.2	450.49	167.25
52	1	145	3	29	6	3	0.21	0.12	591.68	49.36
39	1	120	3	30	7	4	0.25	0.12	460.34	251.21
48	1	150	3	29	2	1	0.28	0.05	504.77	540.16
43	1	100	2	29					466.71	126.86
68	1	11	3	27	9	1	0.29	0.19	620.33	241.59
61	1	17	3	28	7	3	0.22	0.17	528.66	165.13
53	1	90	3	29	1	0	0.25	0.06	530.03	110.44
55	1	180	3	30	1	0	0.31	0.07	550.33	111.54
51	2	300	1	28	4	3	0.26	0.1	868.99	572.95
68	1	86	3	28	4	2	0.32	0.13	517.71	279.48
42	2	10	2	29	8	4	0.46	0.16	565.22	279.26
57	2	220	3	28	1	0	0.33	0.1	543.77	193.47
74	2	960	1	28	20	10	0.47	0.24	446.95	242.9
52	2	240	3	30	1	1	0.37	0.16	503.61	181.65
61	1	100	3	28	6	7	0.33	0.1	457.39	276.81
37	2	69	2	29	4	3	0.36	0.13
60	1	227	2	29	7	1	0.24	0.06
43	1	196	3	29	0	3	0.4	0.08
59	1	73	3	29	1	1	0.32	0.07
66	1	727	1	27
46	1	268	2	27	7	8	0.28	0.13
50	1	70	2	29	4	0	0.27	0.05
67	1	120	3	29	5	5	0.41	0.12	543.4	327.76
53	2	305	3	29	16	4	0.26	0.11
48	2	101	3	30	5	1	0.27	0.08	233.79	367.35
57	2	184	3	29	6	3	0.3	0.1	457.79	385.87
54	2	220	3	27	12	1	0.36	0.19	638.12	251.82
57	1	270	1	29	4	9	0.44	0.12	581.11	203.99
49	1	153	2	25	13	8	0.31	0.1	539.57
39	1	81	1	26	3	3	0.35	0.08	548.19	252.77
56	1	242	3	27	9	3	0.43	0.12	498.22	213.86
66	2	448	3	29	7	2	0.39	0.15	463.67	221.7
58	1	159	3	27	13	2	0.59	0.16	660.41	171.12
57	1	241	1	29	4	5	0.34	0.09	439.6	278.33
58	2	105	2	29	11	3	0.25	0.12	472.64	165.63
57	2	426	3	30	9	4	0.42	0.12
61	2	940	3	28	12	2	0.35	0.12	219.54	269.39
53	1	325	3	28	2	0	0.24	0.06	228.91	441.52
41	1	294	1	29	12	14	0.3	0.1	403.21	440.98
51	2	402	2	30	16	2	0.41	0.2	551.12	388.22
56	2	130	3	29	15	12	0.32	0.1	335.1	208.7
59	1	120	1	30	16	5	0.3	0.17	423.08	201.51
39	2	160	3	30					243.28	199.45
69	2	170	3	30	27	1	0.33	0.26	170.28	347.8
54	1	144	1	30	3	7	0.34	0.11	359.28	394.47
60	1	494	3	29	0	2	0.35	0.07
34	2	486	2	28	12	7	0.27	0.15	172.78	479.85
57	1	172	3	29	4	7	0.44	0.1	511.03	214.86
54	2	73	3	29	3	1	0.35	0.1	394.4	222.68
42	1	131	3	28	16	3	0.23	0.11	287.79	199.93
65	2	125	2	28	21	2	0.58	0.15
57	2	157	1	28	5	4	0.3	0.09	320.44	236.6
65	1	253	3	28	5	2	0.36	0.13	449.89	267.02
43	2	63	1	30	4	2	0.26	0.09	401.93
56	2	85	1	29	10	4	0.5	0.15	632.23	198.62
59	1	379	2	29	1	1	0.39	0.11
59	1	391	3	30	3	0	0.18	0.08	290.5
62	2	250	3	30	11	2	0.27	0.11	513.67
35	1	66	1	29	8	12	0.32	0.08	442.77	142.39
58	1	303	2	29	11	1	0.25	0.08	322.23
41	1	210	3	28					192.42	271.53
36	2	265	3	28	7	10	0.28	0.07	436.15	202.3
49	1	100	1	29	8	5	0.31	0.18	340.24
58	1	306	3	30	2	5	0.38	0.11
57	1	134	2	30	1	0	0.31	0.07	492.06	188.25
31	2	11	3	30	12	9	0.4	0.16
58	1	85	2	29	6	3	0.28	0.09	459.89	156.25
48	1	39	1	30	11	8	0.24	0.13	355.89	158.41
55	2	184	3	30	9	3	0.31	0.08
59	1	16	1	27	17	1	0.67	0.13
48	2	160	3	30	18	1	0.26	0.14	424.09	301.22
54	1	280	1	29	8	1	0.31	0.16	580.78	316.55
56	2	87	1	29	23	8	0.4	0.12
52	1	334	3	29	3	0	0.3	0.09	364.03	366.46
51	2	103	3	29	16	5	0.29	0.09
57	2	113	3	28	4	3	0.36	0.13
44	2	121	3	29	7	6	0.31	0.07	446.62	272.59
31	2	70	3	30	6	6	0.3	0.08	261.4	189.37
58	2	170	3	30	3	2	0.33	0.09
39	2	199	3	29	13	6	0.31	0.12	422.74	380.3
55	1	229	3	30	1	1	0.5	0.12	315.47	323.62
50	2	127	3	30	1	1	0.32	0.08
56	1	120	3	30	10	4	0.29	0.1	663.16
45	2	551	2	27	12	4	0.34	0.15
77	1	350	3	29	5	2	0.31	0.07	455.33	364.11
59	2	236	3	29	2	4	0.35	0.08	415.84	151.38
65	1	110	3	30	1	1	0.39	0.09	459.3	198.03
53	1	140	3	30	4	5	0.27	0.07	452.2	281.27
69	1	1072	3	30	6	4	0.35	0.11	436.89	206.3
63	2	818	3	30	7	1	0.29	0.12	382.19	400.29
48	2	62	3	30	4	1	0.31	0.08	420.45	296.83
51	1	123	3	30	3	1	0.34	0.09	384.46	310.76
56	1	184	3	30	3	2	0.36	0.09	548.77	225.7
41	1	25	3	29	11	4	0.24	0.11	442.62	207.25
47	2	124	2	29	6	0	0.26	0.08	335.68	275.56
47	1	154	1	29	4	4	0.28	0.1	465.5	172.14
42	1	35	3	30	10	3	0.25	0.13	470.23	196.83
47	2	200	3	30	1	3	0.34	0.08	602.13	256.72
57	2	270	3	29	3	0	0.51	0.14	452.02	314.85
44	1	378	3	30	5	3	0.32	0.14	490.44	212.42
43	2	120	2	30	8	0	0.36	0.12	502.57	152.06
55	1	136	1	29	5	3	0.4	0.15	543.97	225.05
49	1	198	3	28	3	4	0.4	0.12	583.93	267.23
47	1	94	2	30	6	3	0.27	0.07	398.48	209.69
51	1	329	2	28	9	2	0.51	0.18	626.45	145.13
44	2	110	3	29	6	3	0.26	0.07	488.53	249.4
54	1	91	2	27	3	1	0.35	0.12	457.12	274.02
43	2	32	2	29	2	1	0.28	0.07	454.18	232.33
56	1	22	1	28	14	5	0.35	0.11	549.26	275.36
36	1	32	2	28	5	5	0.37	0.13	442.07	300.97
39	2	34	3	30	14	5	0.48	0.15	580.8	265.42
60	1	176	3	30	8	4	0.49	0.15	573.89	230.25
42	1	160	3	30	4	0	0.26	0.05	447.58	224.44
55	2	139	3	30	2	0	0.29	0.06	442.73	214.96
63	1	294	2	28	9	7	0.39	0.13	566.13	338.74
71	1	417	3	30	0	0	0.36	0.07	533.01	363.95
57	1	478	3	29	5	2	0.27	0.1	449.18	316.59
59	1	25	3	30	0	1	0.45	0.14	482.27	234.18
58	1	160	2	29	10	4	0.35	0.08	483.66	286.22
63	1	497	1	29	10	7	0.36	0.09	454.37	392.85
53	1	200	2	30	4	12	0.36	0.1	463.22	222.02
61	2	207	3	28	2	2	0.36	0.1	460.65	244.33
60	2	62	3	30	3	3	0.28	0.1	399.1	318.56
55	1	333	3	29	13	0	0.66	0.15	491.11	255.45
49	2	492	3	30	12	11	0.33	0.14	392.03	351.95
57	1	312	1	30	19	5	0.35	0.15	562.2	208.61
52	2	250	1	30	3	0	0.28	0.07	539.9	210.43
42	2	734	3	29	3	1	0.31	0.09	518.55	221.64
59	2	250	1	30	19	2	0.37	0.26	520.22	363.66
