# Supplementary material for: How Participation, Physiology, Psychology, and Cognition Interact in Multi- Marathon Runners: Insights from a Harmonised Cross-Sectional Analysis
Source: Research Square preprint supplement (doi:10.21203/rs.3.rs-7392979/v1), 2025-12-29
Supplement: Supplementary file 4 [file e36c8a0927dd9b8a3521ebe1.xlsx]

## Sheet: Sheet0
DistributionChannel	UserLanguage	Consent	Country	Gender	Age	Marathons	CESD_1	CESD_2	CESD_3	CESD_4	CESD_5	CESD_6	CESD_7	CESD_8	STAI_1	STAI_2	STAI_3	STAI_4	STAI_5	STAI_6
Distribution Channel	User Language	Participant Consent Form I confirm I have read and understood the Information Leaflet for the above study. The information has been fully explained to me and I have been able to ask questions, all of which have been answered to my satisfaction. I understand that this study is entirely voluntary, and if I decide that I do not want to take part, I can stop taking part in this study at any time with…	What country are you resident?	Gender	Age? Please type in your age.	How many marathons or ultra marathons have you completed?	How have you felt or behaved over the last week? - I felt depressed	How have you felt or behaved over the last week? - I felt everything I did was an effort	How have you felt or behaved over the last week? - My sleep was restless	How have you felt or behaved over the last week? - I was happy	How have you felt or behaved over the last week? - I felt lonely	How have you felt or behaved over the last week? - I enjoyed life	How have you felt or behaved over the last week? - I felt sad	How have you felt or behaved over the last week? - I could not get going	How do you feel at this exact moment? - I feel calm	How do you feel at this exact moment? - I am tense	How do you feel at this exact moment? - I feel upset	How do you feel at this exact moment? - I am relaxed	How do you feel at this exact moment? - I feel content	How do you feel at this exact moment? - I am worried
anonymous	EN	1	Ireland	1	59	379	1	2	3	4	3	4	1	2	4	1	1	4	4	1
anonymous	EN	1	Ireland	1	53	164	1	1	2	4	1	4	1	1	4	1	1	3	3	3
anonymous	EN	1	Ireland	1	40	109	2	3	2	3	1	3	2	2	2	2	1	2	3	2
anonymous	EN	1	Ireland	1	69	87	1	1	2	4	1	4	1	1	4	1	1	4	4	2
anonymous	EN	1	Ireland	1	41	25	1	1	2	4	1	4	1	1	3	1	2	4	3	1
anonymous	EN	1	Ireland	2	42	115	1	1	1	4	1	4	1	1	4	1	1	4	4	1
anonymous	EN	1	Ireland	2	55	228	2	1	3	3	2	4	2	1	4	1	1	4	4	3
anonymous	EN	1	Ireland	2	52	261	1	1	2	4	1	4	1	2	4	1	1	3	4	1
anonymous	EN	1	England	1	50	98	1	1	2	4	1	4	2	1	4	1	1	2	2	2
anonymous	EN	1	United Kingdom	2	60	176	1	1	2	4	1	4	1	1	3	1	1	4	4	1
anonymous	EN	1	United Kingdom	2	55	88	1	3	3	4	1	2	2	1	3	2	1	2	3	1
anonymous	EN	1	United Kingdom	2	66	232	1	3	2	4	2	4	2	2	3	1	2	3	3	1
anonymous	EN	1	Uk	2	50	102	1	1	2	4	1	4	1	1	4	1	1	4	4	1
anonymous	EN	1	England	1	52	113	1	1	1	3	1	3	1	2	4	1	1	4	3	2
anonymous	EN	1	England	2	59	198	1	1	4	4	1	4	2	1	4	1	1	4	4	1
anonymous	EN	1	United Kingdom	1	60	308	1	1	2	3	1	3	1	1	3	1	1	4	4	1
anonymous	EN	1	england	2	42	97	1	2	1	4	1	4	1	2	4	1	1	4	4	1
anonymous	EN	1	Ireland	1	41	11	2	2	1	3	1	4	2	2	3	2	2	2	3	2
anonymous	EN	1	Ireland	2	56	85	3	2	4	2	3	3	3	2	2	2	2	3	2	4
anonymous	EN	1	UK	2	45	82	1	1	2	3	1	4	2	1	4	1	1	3	4	2
anonymous	EN	1	United Kingdom	1	59	244	2	2	2	4	1	4	1	1	3	2	1	3	3	1
anonymous	EN	1	Uk	2	63	215	3	2	3	2	2	2	3	3	2	2	2	2	2	2
anonymous	EN	1	Ireland	1	59	123	2	2	2	3	2	3	2	1	3	1	1	2	3	1
anonymous	EN	1	Ireland	1	52	190	1	1	2	4	2	4	1	1	4	1	1	3	3	2
anonymous	EN	1	UK	1	59	472	3	2	3	2	2	2	3	2	3	1	2	2	2	1
anonymous	EN	1	Northern Ireland	1	38	78	3	3	4	3	1	3	2	2	2	1	1	3	3	2
anonymous	EN	1	Uk	2	49	88	2	2	2	3	2	3	2	1	2	1	1	3	3	1
anonymous	EN	1	Ireland	1	55	58	1	2	2	4	1	3	2	2	4	2	1	4	4	3
anonymous	EN	1	Northern Ireland	2	51	17	1	1	3	4	1	4	1	1	3	1	1	3	3	1
anonymous	EN	1	Ireland	1	54	98	1	1	2	4	1	4	1	1	3	1	1	3	4	2
anonymous	EN	1	England	2	36	56	1	1	3	4	1	4	2	1	3	2	1	4	4	2
anonymous	EN	1	Ireland	2	56	261	1	1	1	4	1	4	1	1	4	1	1	4	4	1
anonymous	EN	1	United Kingdom	1	53	251	3	2	4	1	3	1	3	3	3	3	2	2	3	3
anonymous	EN	1	England	2	75	227	1	1	1	4	1	4	1	1	3	1	1	3	4	1
anonymous	EN	1	England	2	63	92	3	2	4	3	1	3	2	2	4	1	1	4	3	2
anonymous	EN	1	Uk	1	53	117	4	4	4	1	4	3	4	4	3	4	4	3	1	3
anonymous	EN	1	United Kingdom	1	54	61	1	2	2	4	1	4	1	2	4	1	1	4	4	1
anonymous	EN	1	United Kingdom	1	46	114	2	2	1	3	1	3	2	1	2	3	1	2	2	2
anonymous	EN	1	England	2	44	24	2	2	1	2	2	3	2	1	4	2	1	2	3	1
anonymous	EN	1	Ireland	1	69	12	1	3	3	4	1	4	1	3	3	2	1	3	3	2
anonymous	EN	1	Uk	1	56	584	1	1	1	4	1	4	1	1	4	1	1	4	4	2
anonymous	EN	1	England	2	61	900	4	3	4	3	1	2	4	3	1	3	3	1	1	4
anonymous	EN	1	Ireland	1	34	83	4	3	3	2	4	1	3	3	2	2	2	2	2	2
anonymous	EN	1	United Kingdom	2	47	106	1	2	1	3	2	3	3	2	3	1	1	3	2	2
anonymous	EN	1	England	2	58	250	4	4	4	2	4	2	4	2	2	2	3	1	1	3
anonymous	EN	1	Northern Ireland	1	44	110	1	1	2	3	1	4	2	1	3	1	1	4	4	2
anonymous	EN	1	England	1	35	305	2	3	4	3	3	4	2	3	2	3	2	1	2	4
anonymous	EN	1	England	2	49	100	1	1	4	3	3	3	3	1	3	2	1	2	2	2
anonymous	EN	1	Ireland	1	53	79	2	1	1	4	1	4	1	1	4	3	1	4	4	3
anonymous	EN	1	Ireland	1	38	43	1	1	2	4	2	4	3	2	4	2	2	3	4	2
anonymous	EN	1	Ireland	1	48	18	1	1	1	3	1	4	1	2	4	1	1	4	3	1
anonymous	EN	1	N Ireland	1	53	30	1	2	3	4	2	4	2	1	4	1	1	4	4	1
anonymous	EN	1	UK	2	58	21	1	2	2	4	1	4	2	1	3	2	1	3	4	2
anonymous	EN	1	Ireland	2	48	110	1	1	1	3	2	3	1	1	4	3	1	4	4	3
anonymous	EN	1	Rep of Ireland	1	44	70	1	2	1	4	1	4	1	1	4	1	1	4	4	1
anonymous	EN	1	Scotland	1	56	313	1	1	4	4	1	4	1	1	4	1	1	4	4	1
anonymous	EN	1	England	1	45	38	3	1	3	4	1	4	1	2	2	2	1	3	2	1
anonymous	EN	1	United Kingdom	1	53	175	2	2	3	2	2	3	2	2	4	1	1	4	3	2
anonymous	EN	1	England	2	51	104	4	2	4	1	2	1	4	3	3	2	1	2	2	3
anonymous	EN	1	England	1	49	153	1	1	1	3	2	4	1	1	4	1	1	3	3	1
anonymous	EN	1	Usa	1	60	80	1	1	3	4	1	4	1	1	4	2	1	3	3	2
anonymous	EN	1	England	1	58	248	2	2	3	3	2	3	2	2	4	1	1	4	4	1
anonymous	EN	1	United Kingdom	2	39	182	2	4	4	2	3	1	4	4	4	1	4	4	1	4
anonymous	EN	1	Ireland	1	43	363	1	2	2	4	2	4	2	2	4	1	1	3	3	1
anonymous	EN	1	Ireland	1	62	423	1	2	2	4	1	3	2	2	3	1	1	3	3	1
anonymous	EN	1	Ireland	1	53	119	1	1	1	4	1	4	1	1	4	1	1	4	4	1
anonymous	EN	1	Ireland	2	58	300	1	1	4	4	1	4	1	3	4	1	1	4	3	2
anonymous	EN	1	England	2	53	331	3	3	4	3	3	2	3	1	3	4	1	1	2	2
anonymous	EN	1	Ireland	2	74	947	1	1	3	4	1	4	2	2	4	1	1	3	3	3
anonymous	FI	1	Finland	2	57	933	3	3	4	1	1	1	1	2	3	1	1	2	1	3
anonymous	EN	1	Uk	2	53	23	3	4	4	2	1	3	3	3	2	1	1	2	2	1
anonymous	EN	1	UK	1	72	634	1	2	1	3	1	2	2	2	4	1	1	4	2	2
anonymous	EN	1	Ireland	2	44	101	1	2	2	4	2	4	1	2	4	1	1	4	4	1
anonymous	EN	1	England	2	66	425	4	4	4	1	4	1	4	2	1	3	4	3	1	4
anonymous	EN	1	England	1	37	173	3	4	4	2	3	1	3	3	3	2	1	2	1	2
anonymous	EN	1	UK	2	58	71	4	4	4	1	3	1	4	2	1	4	4	1	1	4
anonymous	EN	1	Ireland	2	60	150	1	1	3	4	1	4	1	2	4	1	1	4	4	1
anonymous	EN	1	United Kingdom	1	26	13	3	4	1	2	1	3	3	4	2	3	3	2	2	4
anonymous	EN	1	UK	1	55	165	1	1	1	3	1	3	1	1	4	1	1	4	3	2
anonymous	EN	1	united kingdom	2	48	118	1	1	3	3	1	4	1	2	4	1	2	4	3	1
anonymous	EN	1	England	1	32	472	1	1	2	3	1	2	1	1	4	1	1	3	3	1
anonymous	EN	1	Ireland	1	56	100	2	1	2	3	1	4	2	1	4	1	2	2	2	2
anonymous	EN	1	Ireland	2	55	135	1	1	2	4	1	4	1	1	4	1	1	4	4	1
anonymous	EN	1	UK	2	53	107	1	2	1	3	3	3	2	2	3	1	1	3	3	1
anonymous	EN	1	Ireland	2	45	74	1	2	4	3	1	4	1	1	3	1	1	3	3	1
anonymous	EN	1	England	1	44	198	1	2	2	4	2	4	2	1	4	1	1	4	4	1
anonymous	EN	1	Ireland	1	56	477	3	2	2	2	1	2	1	1	4	1	1	4	3	1
anonymous	EN	1	Ireland	2	56	99	1	2	2	4	1	4	1	1	4	1	1	4	4	2
anonymous	EN	1	Ireland	2	42	27	1	1	2	4	2	4	2	1	4	1	1	4	4	2
anonymous	EN	1	Ireland	2	52	14	1	1	1	4	1	4	1	1	4	1	1	4	4	1
anonymous	EN	1	Ireland	1	55	145	2	2	2	3	3	3	2	1	3	3	1	2	2	2
anonymous	EN	1	Uk	2	39	309	1	1	1	4	1	4	2	2	4	1	1	4	4	2
anonymous	EN	1	England	1	41	423	1	2	1	3	1	4	1	1	3	2	1	4	3	1
anonymous	EN	1	Wales	2	51	131	1	1	2	4	1	4	2	1	3	3	1	3	4	1
anonymous	EN	1	England	1	54	128	2	1	2	3	2	3	2	2	3	3	1	2	3	3
anonymous	EN	1	England	1	54	107	1	1	1	3	1	3	1	2	4	1	1	3	4	1
anonymous	EN	1	England	2	58	110	1	1	2	3	1	4	1	1	2	3	1	3	3	2
anonymous	EN	1	UK	1	69	200	3	4	3	2	3	2	3	3	2	2	2	2	1	2
anonymous	EN	1	England	2	46	125	1	1	2	4	1	4	2	1	3	1	1	3	3	2
anonymous	EN	1	UK	1	43	52	2	3	2	3	2	2	2	2	3	2	1	2	2	3
anonymous	EN	1	UK	2	57	325	3	2	2	2	3	2	3	2	4	1	1	4	3	2
anonymous	EN	1	Uk	2	55	158	3	2	2	2	3	2	3	2	1	4	3	1	1	4
anonymous	EN	1	England	2	46	59	1	1	4	4	1	4	1	2	4	1	1	4	4	1
anonymous	EN	1	United Kingdom	2	50	135	1	1	1	4	1	4	1	1	4	1	1	3	3	1
anonymous	EN	1	England	1	55	359	1	1	4	4	1	3	2	1	4	1	1	3	3	1
anonymous	EN	1	Uk	2	43	33	1	2	3	4	1	4	1	3	2	2	1	2	2	2
anonymous	EN	1	England	1	37	230	1	2	3	3	1	3	1	2	3	1	1	3	3	1
anonymous	EN	1	England	2	43	55	1	1	1	4	3	4	3	2	4	1	1	4	4	1
anonymous	EN	1	Wales	1	52	102	1	1	2	4	2	4	1	1	3	1	1	3	3	1
anonymous	EN	1	England	2	53	333	1	1	2	3	1	3	2	1	3	1	1	3	3	1
anonymous	EN	1	United Kingdom	2	53	186	2	2	4	2	1	3	2	2	2	2	1	2	2	1
anonymous	EN	1	UK	1	55	253	2	2	2	3	3	4	2	3	3	2	2	3	3	1
anonymous	EN	1	England	1	61	326	1	1	2	4	1	2	1	1	4	1	1	3	3	1
anonymous	EN	1	England	2	46	140	3	3	4	3	1	2	2	3	2	1	1	2	2	2
anonymous	EN	1	Uk	2	65	78	4	3	4	2	4	3	2	3	3	3	2	2	2	3
anonymous	EN	1	UK	1	66	205	1	2	4	3	2	4	1	1	4	1	1	4	2	1
anonymous	EN	1	England	1	63	295	1	1	4	3	1	3	1	2	3	1	1	2	3	1
anonymous	EN	1	Cornwall	2	58	488	4	4	4	1	3	1	4	3	1	4	3	1	1	2
anonymous	EN	1	England	2	43	34	1	1	1	3	1	3	1	1	3	1	1	3	3	1
anonymous	EN	1	England	1	54	1260	4	3	2	1	4	1	4	3	2	2	2	1	1	4
anonymous	EN	1	United Kingdom	1	47	140	2	3	3	1	1	1	1	3	2	1	1	2	2	1
anonymous	ZH-S	1	England	1	53	29	1	1	1	4	1	4	1	1	4	1	1	4	3	1
anonymous	EN	1	ireland	1	51	100	1	1	1	4	1	4	1	1	4	1	1	4	4	1
anonymous	EN	1	Uk	1	60	103	2	2	1	3	1	3	2	1	3	1	1	2	3	2
anonymous	EN	1	United Kingdom	1	65	102	1	1	1	3	1	3	1	1	3	1	1	3	3	1
anonymous	EN	1	England	2	50	150	1	1	3	4	1	4	1	1	4	1	1	4	4	1
anonymous	EN	1	England	1	56	120	1	2	2	4	1	3	1	1	3	1	1	3	3	1
anonymous	EN	1	United Kingdom	2	62	86	1	1	2	4	1	4	2	1	2	1	1	4	4	1
anonymous	EN	1	United Kingdom	1	71	211	1	1	2	4	1	4	1	1	4	1	1	4	4	2
anonymous	EN	1	Wales	1	58	291	1	1	2	4	1	4	1	2	4	1	1	4	4	1
anonymous	EN	1	England	1	53	60	1	1	2	4	1	4	1	1	4	1	1	4	4	1
anonymous	EN	1	Uk	1	51	67	1	1	1	4	1	4	1	1	4	1	1	4	4	1
anonymous	EN	1	England	2	51	321	1	3	2	4	1	4	1	2	3	2	1	3	2	1
anonymous	EN	1	England	2	53	9	1	1	1	4	1	4	1	1	4	1	1	4	4	1
anonymous	EN	1	United Kingdom	2	57	367	1	1	1	3	1	4	1	1	4	1	1	3	3	1
anonymous	EN	1	UK	2	49	105	1	1	1	4	1	4	1	1	3	1	1	3	3	2
anonymous	EN	1	United Kingdom	1	57	207	1	1	1	4	1	4	1	3	4	1	1	4	4	1
anonymous	EN	1	United Kingdom	2	50	154	3	3	4	2	2	2	4	4	3	2	4	3	1	2
anonymous	EN	1	United Kingdom	2	57	336	2	3	2	3	3	2	3	2	3	1	3	3	3	3
anonymous	EN	1	England	2	35	6	2	2	2	4	1	4	2	2	3	1	1	3	3	1
anonymous	EN	1	England	2	54	138	3	4	4	1	3	2	2	2	2	2	2	2	3	3
anonymous	EN	1	Ireland	1	47	92	1	1	1	4	1	4	1	1	4	1	1	4	4	1
anonymous	EN	1	Australia	2	45	204	1	2	2	3	1	4	1	3	4	2	1	3	3	2
anonymous	EN	1	Ireland	1	54	103	3	2	1	3	2	3	2	2	2	3	2	2	3	3
anonymous	EN	1	Ireland	1	60	35	4	3	4	1	4	1	4	1	2	3	2	2	1	2
anonymous	EN	1	Ireland	1	41	160	1	1	1	4	1	4	1	1	4	1	1	4	4	1
anonymous	EN	1	Ireland	1	59	82	1	1	1	3	1	4	1	1	3	1	1	4	4	1
anonymous	EN	1	Northern Ireland	2	38	34	1	2	2	3	1	3	1	2	4	1	1	3	3	1
anonymous	EN	1	Ireland	1	65	52	1	1	2	4	1	3	1	1	4	4	1	2	2	1
anonymous	EN	1	Ireland	1	30	54	1	1	2	3	1	4	1	2	2	2	1	3	3	2
anonymous	EN	1	Ireland	1	49	104	2	1	2	2	1	3	1	1	3	2	2	2	2	2
anonymous	EN	1	Wales	2	59	62	2	2	3	4	1	4	2	1	3	1	1	2	4	1
anonymous	EN	1	Ireland	1	56	100	1	1	2	4	1	4	1	1	4	2	1	4	4	2
anonymous	EN	1	Ireland	2	52	31	2	2	1	4	3	4	2	2	4	1	1	4	4	1
anonymous	EN	1	Ireland	1	49	27	2	2	2	3	1	3	1	1	4	1	1	4	3	2
anonymous	EN	1	Ireland	1	57	127	1	1	1	3	1	3	2	1	4	1	1	4	4	1
anonymous	EN	1	Ireland	1	49	84	1	1	1	4	1	4	1	2	2	1	1	3	3	1
anonymous	EN	1	Ireland	1	47	4	1	1	2	3	1	4	2	1	4	1	1	4	4	1
anonymous	EN	1	Ireland	1	58	85	1	1	1	4	1	4	1	1	4	1	1	4	3	1
anonymous	EN	1	Ireland	1	48	40	1	1	2	3	1	2	1	1	3	1	1	3	2	2
anonymous	EN	1	Ireland	1	56	28	2	2	3	4	1	4	2	2	3	1	1	3	3	1
anonymous	EN	1	Ireland	2	48	110	2	2	2	3	2	3	1	1	2	1	1	2	2	2
anonymous	EN	1	Ireland	1	44	72	1	1	2	3	1	4	1	1	4	1	1	4	3	2
anonymous	EN	1	Ireland	1	49	18	2	2	2	3	1	3	2	2	4	1	1	4	3	2
anonymous	EN	1	England	2	45	30	1	1	2	4	2	4	1	1	4	1	1	3	4	1
anonymous	EN	1	Ireland	2	47	35	3	4	4	3	4	1	4	4	2	1	2	2	1	4
anonymous	EN	1	Ireland	2	60	26	2	2	4	3	4	2	2	1	3	1	1	4	2	1
anonymous	EN	1	Ireland	2	55	103	1	1	1	4	1	4	1	1	4	1	1	4	4	1
anonymous	EN	1	UK	1	68	140	1	2	3	1	4	2	4	3	3	1	3	3	2	4
anonymous	EN	1	Ireland	2	46	6	1	1	4	4	1	4	1	1	3	1	1	3	3	1
anonymous	EN	1	Uk	1	62	150	1	1	2	4	1	4	1	1	4	1	1	4	4	1
anonymous	EN	1	UK	2	60	310	1	1	3	4	1	4	1	1	4	1	1	4	4	1
anonymous	EN	1	Ireland	2	47	20	1	1	2	4	1	4	1	1	4	1	1	4	4	2
anonymous	EN	1	Ireland	2	47	4	1	1	2	4	1	4	2	2	4	1	1	4	3	2
anonymous	EN	1	Ireland	1	49	237	1	2	2	4	1	4	1	1	4	1	1	4	3	1
anonymous	EN	1	Ireland	2	48	26	1	1	2	4	1	4	1	1	4	1	1	4	4	1
anonymous	EN	1	Ireland	1	51	51	1	1	1	4	1	4	1	1	4	1	1	4	2	1
anonymous	EN	1	Ireland	1	57	128	2	2	4	3	2	3	2	2	3	2	2	3	2	4
anonymous	EN	1	Ireland	1	55	130	3	3	2	3	2	2	3	2	2	3	3	4	1	2
anonymous	EN	1	Uk	1	53	119	1	1	2	4	1	4	1	1	4	1	1	4	4	1
anonymous	EN	1	Ireland	1	53	9	1	1	3	4	1	4	1	2	4	1	1	3	3	2
anonymous	EN	1	Ireland	1	49	190	1	1	2	4	1	4	1	1	4	1	1	4	4	1
anonymous	EN	1	Ireland	1	58	9	1	1	1	4	1	4	1	1	4	1	1	4	3	1
anonymous	EN	1	Ireland	2	37	62	2	2	1	4	2	4	2	1	4	1	1	4	3	2
anonymous	EN	1	Ireland	2	51	35	1	1	2	4	1	4	1	2	4	1	1	4	4	2
anonymous	EN	1	uk	1	65	109	2	2	3	3	1	3	1	2	3	1	1	3	3	1
anonymous	EN	1	Ireland	2	50	11	1	2	3	4	1	4	1	2	4	1	1	4	4	1
anonymous	EN	1	Ireland	1	47	116	1	2	2	3	1	4	2	2	3	1	1	3	3	2
anonymous	EN	1	Ireland	1	69	127	1	2	2	4	1	4	1	2	4	1	1	4	4	1
anonymous	EN	1	Ireland	1	60	9	1	1	2	4	1	3	1	1	4	1	1	4	3	1
anonymous	EN	1	England	2	45	141	1	1	1	4	1	4	4	1	4	1	1	4	4	2
anonymous	EN	1	Ireland	1	70	405	1	1	2	3	2	3	2	2	4	2	1	3	4	2
anonymous	EN	1	UK	1	61	232	1	1	1	4	1	4	1	1	4	1	1	4	3	2
anonymous	EN	1	IRELAND	2	54	25	2	2	3	3	1	3	2	2	1	2	2	1	2	2
anonymous	EN	1	England	1	65	439	1	1	1	4	1	4	1	2	4	1	1	4	4	1
anonymous	EN	1	Ireland	2	54	22	1	2	1	4	1	4	2	1	4	1	1	4	4	1
anonymous	EN	1	England	2	50	313	1	1	3	4	1	4	1	1	3	1	1	4	4	2
anonymous	EN	1	Wales	2	48	101	1	2	4	3	1	4	1	1	4	1	1	3	4	1
anonymous	EN	1	Ireland	2	57	6	1	1	1	4	1	4	1	1	4	1	1	4	4	1
anonymous	EN	1	Ireland	2	36	15	2	2	3	3	1	3	2	2	3	2	1	3	3	3
anonymous	EN	1	England	2	66	148	1	1	1	4	1	4	1	1	4	1	1	4	3	1
anonymous	EN	1	Ireland	1	52	560	1	2	3	3	1	2	1	2	2	1	1	2	2	1
anonymous	EN	1	Ireland	2	56	14	1	1	2	4	1	4	1	1	3	2	1	2	3	2
anonymous	EN	1	United Kingdom	2	50	205	4	3	4	2	4	2	4	4	2	2	2	2	2	2
anonymous	EN	1	Ireland	1	43	45	2	2	2	3	1	4	1	2	4	1	1	3	4	1
anonymous	EN	1	ireland	1	57	101	1	2	3	2	1	3	1	2	4	1	1	4	3	2
anonymous	EN	1	Ireland	2	52	12	1	2	2	4	1	4	1	2	4	1	1	3	3	1
anonymous	EN	1	England	1	44	158	1	1	1	4	1	4	1	1	4	1	1	4	4	1
anonymous	EN	1	Ireland	2	52	2	1	2	3	4	2	4	1	1	2	2	1	3	4	2
anonymous	EN	1	Ireland	2	61	107	3	1	3	3	4	3	4	1	1	4	2	1	1	4
anonymous	EN	1	Ireland	2	57	108	1	1	1	4	1	4	1	1	4	1	1	4	4	1
anonymous	EN	1	Cork	1	50	65	1	1	1	3	1	3	1	1	3	1	1	3	2	2
anonymous	EN	1	England	1	57	204	1	1	1	4	1	4	1	1	4	1	1	2	2	1
anonymous	EN	1	Ireland	1	44	50	3	3	4	2	3	1	4	2	3	4	2	1	4	3
anonymous	EN	1	Ireland	1	56	130	2	2	3	3	1	3	1	1	4	2	1	4	4	2
anonymous	EN	1	Ireland	1	55	3	1	1	3	4	1	3	1	1	3	1	2	3	3	2
anonymous	EN	1	Ireland	1	46	62	1	1	1	4	1	4	1	1	2	2	1	2	2	1
anonymous	EN	1	Ireland	1	56	72	1	1	2	3	2	3	1	2	2	1	1	2	3	2
anonymous	EN	1	Ireland	2	47	80	1	1	1	4	1	4	1	1	4	1	1	4	4	1
anonymous	EN	1	Switzerland	1	38	80	2	2	1	4	1	4	2	2	3	2	1	3	3	2
anonymous	EN	1	United Kingdom	1	51	327	1	1	3	4	1	4	1	1	4	1	1	4	4	1
anonymous	EN	1	Ireland	2	49	20	1	1	2	4	1	4	1	1	4	1	1	4	4	1
anonymous	SV	1	Sverige	1	54	51	3	1	3	2	1	2	3	1	3	2	1	3	2	1
anonymous	EN	1	Ireland	2	39	24	1	1	1	4	1	4	1	1	4	1	1	4	4	1
anonymous	EN	1	England	1	45	192	2	3	2	3	1	3	2	1	3	1	1	3	3	1
anonymous	EN	1	Ireland	1	54	28	1	4	3	4	1	3	1	1	4	1	1	4	3	1
anonymous	EN	1	Ireland	1	62	205	2	1	1	3	2	3	2	1	4	1	1	3	3	1
anonymous	EN	1	USA	1	74	825	3	4	4	1	3	1	4	1	3	3	3	2	1	2
anonymous	EN	1	United States	1	64	205	1	1	3	3	1	4	2	1	4	1	1	4	3	1
anonymous	DA	1	Denmark	1	56	863	1	1	2	4	1	4	1	1	4	1	1	4	4	1
preview	EN	1	Ireland	1	59	222	2	2	2	2	2	2	2	2	2	2	2	2	2	2
anonymous	EN	1	United States	1	65	184	2	1	2	3	1	3	1	2	3	1	1	3	3	1
anonymous	NO	1	Norway	1	63	54	3	2	2	1	2	1	2	4	3	2	1	3	2	3
anonymous	EN	1	Ireland	2	63	10	2	1	2	4	1	3	1	1	3	2	1	3	4	2
anonymous	EN	1	Ireland	1	61	202	1	1	1	1	1	4	1	1	4	1	1	4	4	1
anonymous	EN	1	Sweden	2	56	49	2	2	2	3	1	3	2	2	3	2	1	3	3	2
anonymous	EN	1	Australia	2	70	365	4	3	4	2	1	3	4	1	3	3	3	2	2	1
anonymous	EN	1	Ireland	2	50	21	2	2	1	3	1	3	2	1	2	1	1	3	3	2
anonymous	EN	1	England	1	36	6	2	1	2	3	1	3	2	2	4	1	1	4	3	1
anonymous	EN	1	England	2	68	2	1	2	2	4	1	4	1	1	3	2	1	3	3	1
anonymous	EN	1	England	1	57	94	2	3	4	2	1	3	2	3	2	3	1	2	2	2
anonymous	EN	1	UK	1	67	38	1	1	3	3	1	4	1	1	3	1	1	3	4	1
anonymous	EN	1	England	1	42	40	1	1	2	4	1	4	1	1	3	1	1	4	4	1
anonymous	EN	1	England	2	57	183	1	1	2	3	1	4	1	1	4	1	1	3	3	1
anonymous	EN	1	Uk	2	53	20	3	3	3	2	1	2	2	2	3	1	1	3	3	2
anonymous	EN	1	Scotland	1	53	93	1	1	2	4	1	4	1	2	4	1	1	3	4	1
anonymous	EN	1	England	1	55	238	1	1	2	4	3	3	2	2	4	1	1	4	3	1
anonymous	EN	1	UK	2	49	12	1	1	3	4	1	4	1	1	2	1	1	4	4	2
anonymous	EN	1	England	1	39	77	1	1	3	3	1	3	1	1	4	1	1	3	3	1
anonymous	EN	1	England	1	66	28	1	1	2	4	1	4	1	1	4	1	1	4	3	1
anonymous	EN	1	England	2	43	6	1	1	2	4	1	4	1	1	3	1	1	3	4	1
anonymous	EN	1	Ireland	1	54	274	1	2	1	3	1	3	3	2	4	1	1	3	3	1
anonymous	EN	1	England	2	45	39	3	3	3	2	2	3	2	2	3	2	1	2	2	2
anonymous	EN	1	UK	2	61	206	1	2	2	2	3	4	2	2	2	2	2	3	3	1
anonymous	EN	1	England	1	53	100	2	2	1	3	3	3	2	2	2	3	3	1	1	2
anonymous	EN	1	UK	2	59	200	1	1	2	4	1	4	1	1	4	1	1	4	4	1
anonymous	EN	1	UK	1	64	18	1	1	1	4	1	4	1	1	4	1	1	4	4	1
anonymous	EN	1	Canada	2	50	58	3	2	4	2	2	3	3	1	2	3	2	2	2	3
anonymous	EN	1	Ireland	1	52	5	1	1	2	2	2	2	2	1	2	2	2	3	3	1
anonymous	EN	1	England	1	52	325	1	1	1	4	1	4	1	1	4	1	1	4	4	1
anonymous	EN	1	United Kingdom	1	41	40	1	1	1	3	1	3	1	1	3	1	1	3	2	2
anonymous	EN	1	England	2	66	430	4	4	2	1	4	1	4	3	3	3	4	3	1	2
anonymous	EN	1	UK	1	36	9	3	4	4	2	4	2	4	3	3	3	3	3	2	3
anonymous	EN	1	Uk	1	56	268	2	1	3	2	3	3	2	3	3	3	1	3	2	1
anonymous	EN	1	United Kingdom	1	65	51	1	1	3	4	1	4	1	2	4	1	1	3	4	1
anonymous	EN	1	England	2	26	2	1	1	2	4	1	4	1	2	4	1	1	4	4	1
anonymous	EN	1	Australia	1	65	106	2	2	2	3	2	4	1	1	4	1	1	4	4	1
anonymous	EN	1	Australia	1	60	267	2	2	2	3	1	4	1	1	3	1	1	3	3	1
preview	DE	1	Deutschland	1	58	982	1	1	1	4	1	4	1	1	4	1	1	4	4	1
anonymous	PT-BR	1	BRASIL	2	52	2	1	1	1	4	1	4	1	1	4	1	2	2	4	1
anonymous	PT-BR	1	Brasil	1	45	50	1	1	1	4	1	4	1	1	4	1	2	1	3	1
anonymous	PT-BR	1	Brasil	1	47	1	1	3	1	4	3	4	1	1	3	3	1	3	3	1
anonymous	PT-BR	1	Brasil	1	52	8	1	1	2	3	1	3	1	1	2	2	2	2	2	2
anonymous	PT-BR	1	Brasil	2	42	11	3	3	3	3	3	3	3	3	3	3	3	3	2	2
anonymous	PT-BR	1	Brasil	1	32	3	1	1	1	4	1	4	1	1	3	1	1	3	4	2
anonymous	PT-BR	1	Brasil	2	60	10	1	4	1	4	1	4	1	1	4	1	1	3	4	2
preview	DE	1	Deutschland	2	60	342	1	1	2	4	1	4	1	1	4	1	1	4	4	1
anonymous	PT-BR	1	Brasil	2	60	1	2	1	1	4	1	4	1	1	4	1	1	4	4	1
preview	DE	1	Deutschland	2	44	367	2	2	3	3	1	4	1	2	2	3	1	2	3	2
anonymous	PT	1	Brasil	1	70	6	4	1	2	3	4	3	3	2	4	2	2	3	3	2
anonymous	PT-BR	1	Brasil	2	55	7	1	1	1	4	1	4	1	1	4	1	1	2	4	1
anonymous	PT-BR	1	Brasil	1	45	6	1	1	2	4	1	4	1	1	4	1	1	4	3	1
anonymous	PT-BR	1	Brasil	1	42	1	1	1	2	3	3	3	2	1	4	1	1	3	3	2
anonymous	PT-BR	1	Brasil	1	33	2	1	1	2	4	1	1	1	1	3	1	3	3	4	3
anonymous	PT-BR	1	Brasil	1	38	7	1	1	1	4	1	4	1	1	4	1	1	3	3	1
anonymous	EN	1	Mexico	2	40	7	1	2	1	4	2	3	1	1	4	2	1	3	3	3
preview	DE	1	Deutschland	1	63	726	1	1	1	2	1	2	1	1	4	1	1	4	3	2
anonymous	PT-BR	1	Brasil	1	45	2	1	1	1	3	1	3	2	1	3	1	1	3	3	1
anonymous	EN	1	Ireland	1	69	8	2	3	1	3	1	2	1	3	3	1	2	3	3	2
anonymous	PT-BR	1	Brasil	1	62	8	1	2	2	4	1	4	1	1	3	1	1	3	3	3
anonymous	EN	1	Ireland	1	46	9	2	2	2	3	1	4	2	2	2	2	1	3	2	2
anonymous	EN	1	England	1	37	2	2	3	4	3	1	2	4	2	3	2	1	2	2	3
preview	DE	1	Deutschland	1	57	300	1	1	2	4	1	4	1	2	4	1	1	4	4	1
anonymous	EN	1	Wales	1	50	3	4	3	3	3	2	3	2	1	3	2	1	3	1	3
anonymous	PT-BR	1	Brasil	1	49	28	1	2	2	4	1	4	1	1	4	1	1	3	3	2
anonymous	PT-BR	1	Brasil	1	51	2	1	1	2	4	1	4	1	1	4	1	1	3	3	2
anonymous	PT-BR	1	Brasil	1	43	3	1	4	3	4	1	4	1	1	3	3	1	3	4	3
preview	DE	1	Deutschland	1	53	182	1	1	2	4	1	4	1	1	4	1	1	4	4	3
preview	DE	1	Deutschland	2	60	760	1	1	3	2	2	3	1	3	4	1	1	4	4	1
anonymous	EN	1	Australia	2	77	16	2	2	3	3	1	4	2	1	3	2	2	2	2	2
preview	DE	1	Deutschland	1	67	1060	1	1	2	3	1	2	1	1	1	1	1	4	4	1
anonymous	EN	1	England	2	66.5	232	3	1	3	4	2	4	2	1	4	1	1	4	4	1
anonymous	EN	1	Northern Ireland	1	60	150	1	2	3	4	1	4	1	2	4	1	1	4	4	1
anonymous	DE	1	Deutschland	1	65	492	2	3	1	2	2	2	3	3	2	2	2	3	3	3
anonymous	EN	1	Finland	1	45	256	1	1	2	4	1	4	1	1	4	1	1	4	4	1
anonymous	DE	1	Deutschland	1	55	963	1	1	1	2	1	4	1	1	2	2	1	3	4	2
anonymous	PT	1	Brasil	2	46	1	2	2	2	3	1	3	1	1	2	1	4	1	1	2
anonymous	EN	1	Finland	1	55	171	1	1	1	4	1	4	1	1	4	1	1	4	4	1
anonymous	EN	1	Finland	1	44	421	1	1	2	4	2	4	1	1	4	1	1	3	4	1
anonymous	FI	1	Suomi	1	66	331	2	1	2	2	2	3	1	2	2	2	1	3	3	2
anonymous	EN	1	Finland	2	44	72	1	2	1	4	1	4	1	3	4	1	1	4	4	1
anonymous	FI	1	Suomi	2	62	320	1	1	2	3	1	4	1	2	4	1	1	4	4	1
anonymous	EN	1	Finland	2	41	35	1	1	1	4	2	4	2	1	4	1	1	4	4	1
anonymous	EN	1	Ireland	1	62	100	3	3	2	4	3	4	2	1	2	2	1	2	2	1
anonymous	FI	1	Suomessa	1	59	135	1	2	2	4	1	4	2	2	3	1	1	3	3	2
anonymous	EN	1	USA	2	72	358	3	1	1	3	2	4	2	1	4	1	1	4	4	2
anonymous	EN	1	Germany	2	58	298	2	2	2	2	1	3	2	2	2	1	1	4	3	1
anonymous	FI	1	Finland	2	57	405	1	1	2	3	1	3	1	2	3	1	1	3	3	1
anonymous	EN	1	Australia	1	69	120	1	3	3	3	1	3	1	2	3	1	1	3	3	1
anonymous	PT-BR	1	Brasil	1	46	17	1	1	3	3	1	3	1	2	3	2	1	1	2	2
anonymous	DE	1	Deutschland	1	69	749	1	1	2	4	1	4	1	1	4	1	1	4	4	1
anonymous	EN	1	England	1	56	354	1	2	1	4	1	4	1	1	3	1	1	3	3	1
anonymous	DE	1	germany	1	68	654	1	1	1	3	1	3	1	1	3	1	1	3	3	1
anonymous	EN	1	Scotland	2	49	91	1	1	2	4	1	4	1	1	3	1	1	3	3	2
anonymous	PT-BR	1	Brasil	1	68	41	1	2	3	4	1	4	1	1	4	1	1	3	3	1
anonymous	EN	1	Australia	1	70	157	1	1	3	4	1	4	1	1	4	1	1	4	3	1
anonymous	FI	1	Finland	2	46	114	1	1	1	4	1	4	1	1	4	1	1	4	4	1
anonymous	EN	1	Germany	1	54	150	4	4	3	1	4	1	4	4	1	4	4	1	1	4
anonymous	DE	1	Deutschland	2	56	70	1	1	2	3	1	4	2	1	4	1	1	4	4	2
anonymous	EN	1	UK	2	31	3	1	1	2	4	2	4	2	2	3	1	2	3	3	1
anonymous	EN	1	Ireland	2	49	82	1	1	1	4	1	4	1	1	4	2	1	4	4	2
anonymous	FI	1	Finland	1	70	1087	1	2	1	4	1	4	2	2	4	1	1	3	4	3
anonymous	FI	1	Suomi	1	53	96	2	2	1	4	1	4	1	2	4	1	1	4	4	1
anonymous	FI	1	Suomi	2	56	526	1	1	2	4	2	4	2	1	4	1	1	4	4	2
anonymous	PT-BR	1	Brasil	1	45	17	2	3	2	4	1	3	2	1	4	1	1	3	3	3
anonymous	EL	1	Greece	1	44	200	1	1	1	1	2	3	3	1	1	2	1	2	2	3
anonymous	DE	1	Deutschland	1	49	189	4	4	3	1	4	1	4	4	1	4	4	1	1	4
anonymous	EN	1	Uk	1	44	56	1	1	1	1	1	1	1	2	1	3	3	1	1	1
anonymous	EN	1	Uk	1	56	103	4	4	4	2	3	2	4	1	2	2	2	1	1	4
anonymous	EN	1	United Kingdom	1	59	368	2	4	4	3	1	3	1	3	4	1	1	4	4	1
anonymous	DE	1	Deutschland	1	49	83	1	1	1	4	1	4	1	1	4	1	1	4	4	1
anonymous	DE	1	Deutschland	1	29	15	1	1	2	4	2	4	1	2	4	1	2	4	3	1
anonymous	ET	1	Eesti	1	51	130	1	1	1	4	1	3	1	1	4	1	1	4	3	1
anonymous	EN	1	Ireland	2	52	115	2	2	2	3	2	2	2	2	4	1	2	4	2	2
anonymous	EN	1	Northern Ireland	1	58	105	1	1	3	4	1	4	1	1	3	1	1	3	3	1
anonymous	EN	1	England	2	56	155	1	1	2	3	1	4	1	2	2	2	1	2	3	2
anonymous	EN	1	Ireland	2	56	85	2	2	2	3	3	3	2	3	3	2	2	3	3	2
anonymous	EN	1	Ireland	1	62	19	1	1	4	3	1	3	2	2	4	2	2	2	2	2
anonymous	EN	1	Ireland	2	79	299	1	1	4	3	2	4	1	2	4	1	1	4	3	3
anonymous	EN	1	Ireland	1	52	34	1	1	2	4	3	4	1	2	3	1	1	3	3	1
anonymous	EN	1	UK England	1	76	333	2	3	2	2	1	2	1	3	4	1	1	3	2	2
anonymous	ET	1	Eesti	2	45	7	1	1	3	3	2	3	1	2	2	1	1	3	3	1
anonymous	ET	1	estonia	2	58	110	2	2	3	4	3	3	1	2	3	2	2	3	3	2
anonymous	EN	1	United Kingdom	2	56	112	1	1	1	4	1	4	1	1	3	1	1	3	4	1
anonymous	EN	1	England	1	71	104	1	1	2	4	1	4	1	1	3	1	1	2	4	1
anonymous	EN	1	England	1	61	160	2	2	2	4	1	3	1	3	4	1	1	4	4	2
anonymous	DE	1	Germany	1	45	243	2	3	2	1	4	1	3	2	3	4	2	2	2	1
anonymous	FR	1	France	1	62	766	1	1	1	2	1	3	1	1	4	1	1	4	4	1
anonymous	FR	1	France	2	58	540	1	1	2	4	1	3	1	1	3	1	1	3	4	1
anonymous	FR	1	FRANCE	1	64	230	1	1	2	4	1	4	1	2	4	1	1	4	4	1
anonymous	EN	1	Ireland	1	50	250	1	2	2	4	1	4	1	1	4	1	1	4	4	1
anonymous	FR	1	France	1	66	109	2	2	3	3	2	3	2	2	3	2	1	3	3	3
anonymous	FR	1	France	2	42	30	1	1	1	4	1	4	1	2	3	1	1	4	4	1
anonymous	ET	1	eesti	1	42	70	1	2	2	4	1	2	2	1	4	1	1	3	3	1
anonymous	EN	1	England	1	68	1502	2	3	4	2	4	2	4	3	3	1	1	4	3	3
anonymous	FR	1	France	1	56	64	1	1	3	4	2	4	1	2	3	1	1	4	4	2
anonymous	IT	1	Italia	1	52	18	1	1	2	3	1	4	1	2	4	1	1	4	4	1
anonymous	IT	1	Italia	2	48	22	1	1	1	4	1	4	1	1	4	1	1	4	4	1
anonymous	IT	1	Italia	2	51	65	1	1	1	4	1	3	2	1	4	1	1	4	4	1
anonymous	IT	1	Italia	1	59	23	2	1	4	3	2	3	2	1	3	2	1	2	2	2
anonymous	IT	1	Italia	1	54	2	2	1	1	3	2	2	2	1	4	1	1	4	3	2
anonymous	IT	1	Italia	1	60	68	1	1	1	4	1	4	1	1	4	1	1	4	4	1
anonymous	IT	1	Italia	1	60	33	1	2	1	3	3	2	1	1	4	1	1	3	3	2
anonymous	IT	1	ITALIA	1	67	240	1	2	2	4	1	3	1	1	4	1	1	4	4	1
anonymous	IT	1	Italia	1	49	70	1	3	2	3	1	3	1	1	3	3	3	2	4	3
anonymous	IT	1	Italia	1	64	93	1	2	2	4	2	3	2	2	4	1	1	4	4	2
anonymous	IT	1	italia	1	73	205	1	1	1	4	1	4	1	1	4	1	1	4	4	2
anonymous	IT	1	Italia	2	54	74	1	2	4	3	2	3	2	1	4	1	1	4	2	1
anonymous	IT	1	Italia	1	46	92	1	1	2	3	1	4	1	1	4	1	1	4	4	2
anonymous	IT	1	Italia	1	59	74	2	1	1	3	1	3	2	1	4	2	1	2	2	2
anonymous	FR	1	France	1	65	181	1	1	1	3	1	4	1	2	4	1	1	4	3	1
anonymous	IT	1	Italia	1	33	5	1	1	2	3	1	2	2	1	4	1	1	3	3	1
anonymous	FR	1	France	2	44	52	2	2	3	3	1	4	2	2	4	2	1	4	4	2
anonymous	FR	1	France	1	55	284	1	1	1	4	1	4	1	1	4	1	1	4	4	1
anonymous	FR	1	France	2	65	14	3	3	4	2	4	3	3	3	3	4	2	3	2	1
anonymous	IT	1	Italy	1	49	67	1	1	2	3	1	4	2	1	3	2	1	3	3	2
anonymous	IT	1	Italia	1	66	290	1	1	1	3	1	4	1	2	4	1	1	4	3	1
anonymous	IT	1	Italia	2	66	270	1	1	2	3	1	4	1	2	3	2	1	3	4	2
anonymous	IT	1	Imola	1	66	226	1	1	1	3	1	3	1	1	1	3	1	1	4	2
anonymous	IT	1	Italia	2	42	35	1	1	2	3	1	3	2	2	4	1	1	4	3	1
anonymous	IT	1	Italia	2	42	53	1	2	1	4	2	3	1	2	4	1	1	2	4	1
anonymous	IT	1	Italia	1	58	239	1	2	2	3	1	3	1	2	4	1	1	4	3	1
anonymous	IT	1	italia	1	52	162	1	2	1	3	1	3	1	2	4	2	2	3	3	2
anonymous	IT	1	Italia	1	49	55	2	1	2	3	2	3	2	1	4	1	1	4	4	3
anonymous	IT	1	Italia	1	49	27	1	1	3	2	1	2	1	1	4	1	1	3	3	1
anonymous	IT	1	Italia	2	50	46	1	1	2	3	1	3	2	1	3	1	1	3	3	2
anonymous	EN	1	Uk	2	43	671	1	3	2	4	1	4	1	3	4	1	1	3	4	1
anonymous	EN	1	England	2	32	200	3	2	3	3	2	3	2	2	2	2	2	2	3	3
anonymous	EN	1	Ireland	1	68	223	1	1	1	4	1	4	1	1	4	1	1	4	4	1
anonymous	EN	1	Ireland	2	36	7	2	2	3	3	1	3	2	1	2	1	1	2	3	2
anonymous	EN	1	Ireland	2	61	250	4	4	4	3	3	2	4	3	2	2	2	1	2	3
anonymous	EN	1	Uk	1	60	346	2	3	4	3	3	4	3	2	3	3	3	3	2	2
anonymous	EN	1	Northern Ireland	2	60	143	1	1	1	4	1	4	1	2	3	1	1	4	4	2
anonymous	EN	1	Ireland	2	37	65	1	2	3	4	2	4	2	1	4	1	1	3	4	2
anonymous	IT	1	Italia	1	56	672	2	2	2	4	2	4	2	1	4	1	1	4	4	1
anonymous	EN	1	England	1	61	437	1	1	1	3	1	3	1	1	3	1	1	2	3	1
anonymous	EN	1	Northern Ireland	1	60	223	1	1	3	4	1	4	1	2	4	1	1	3	3	3
anonymous	EN	1	UK	1	52	332	1	2	1	4	1	4	1	1	4	1	1	4	4	1
anonymous	EN	1	England	2	26	337	2	1	2	3	3	2	3	2	2	3	3	2	1	2
anonymous	DE	1	Deutschland	1	40	20	2	2	1	2	2	2	1	2	4	1	1	4	3	1
anonymous	DE	1	D	1	58	270	1	2	3	3	1	3	1	2	3	2	1	4	4	2
anonymous	EN	1	Ireland	2	66	264	1	1	2	4	1	4	1	1	4	1	1	4	4	1
anonymous	EN	1	United Kingdom	2	62	315	1	2	1	4	1	4	1	1	3	2	3	2	2	2
anonymous	EN	1	Ireland	1	45	11	1	1	1	3	1	3	1	2	4	1	1	4	3	1
anonymous	EN	1	United Kingdom	2	67	408	1	1	2	4	1	4	1	1	4	1	1	4	4	1
anonymous	EN	1	England	2	75	227	1	2	3	4	1	4	1	1	3	1	1	4	4	1
anonymous	EN	1	Ireland	1	50	15	1	1	1	4	1	4	1	1	4	1	1	4	4	1
anonymous	DE	1	Deutschland	1	54	908	1	3	4	3	1	3	1	1	4	2	1	3	3	2
anonymous	EN	1	UK	2	78	617	1	1	4	4	1	4	1	1	4	1	1	4	4	1
anonymous	EN	1	Ireland	1	61	84	1	1	4	4	1	4	1	1	4	4	1	4	4	1
anonymous	IT	1	Italia	1	64	61	1	1	2	4	1	3	1	1	4	1	1	4	4	1
anonymous	EN	1	Ireland	2	63	1	1	2	3	4	3	4	2	2	3	2	2	2	2	2
anonymous	EN	1	ireland	1	54	114	1	2	1	1	1	4	1	1	4	1	1	4	4	1
anonymous	EN	1	United Kingdom	2	68	120	1	1	2	4	1	4	3	1	4	1	1	4	4	1
anonymous	EN	1	Ireland	2	47	44	2	1	3	4	2	4	1	1	4	1	1	3	3	1
anonymous	EN	1	Ireland	1	51	5	1	1	1	2	2	3	2	1	4	1	1	3	3	1
anonymous	EN	1	Ireland	2	41	39	1	2	2	4	1	4	1	1	4	1	1	4	3	1
anonymous	EN	1	United Kingdom	1	52	333	1	1	1	4	1	3	1	1	4	1	1	4	4	1
anonymous	EN	1	Ireland	2	49	18	1	1	1	4	1	4	1	1	4	1	1	4	4	1
anonymous	EN	1	Singapore	2	48	45	3	3	3	2	1	2	3	1	2	3	1	2	3	1
anonymous	EN	1	United States	1	65	3	1	1	2	4	1	4	2	1	4	1	1	3	3	2
anonymous	EN	1	Ireland	1	61	5	1	1	3	4	1	4	1	1	3	1	1	2	2	1
anonymous	DE	1	Österreich	1	62	31	1	1	1	3	1	2	1	1	4	1	1	3	3	1
anonymous	EN	1	Northern Ireland	1	66	14	1	2	2	4	1	4	1	2	4	1	1	4	4	1
anonymous	EN	1	Scotland	1	76	20	1	1	2	4	1	4	1	1	4	1	1	4	4	1
anonymous	EN	1	USA	1	64	6	1	1	2	4	1	4	1	2	4	1	1	4	3	2
anonymous	EN	1	Canada	2	60	13	1	1	1	4	1	4	1	1	4	1	1	4	3	2
anonymous	EN	1	Brazil	2	64	3	1	1	1	4	2	4	1	1	4	1	1	4	4	1
anonymous	EN	1	Austria	2	60	10	1	1	1	3	1	3	2	1	4	1	1	4	4	1
anonymous	EN	1	US	2	69	20	1	2	2	4	2	4	1	1	4	1	1	4	4	1
anonymous	EN	1	United States	2	65	12	2	2	2	3	1	4	2	1	4	1	1	4	4	1
anonymous	EN	1	USA	2	66	144	2	2	3	3	2	3	2	1	3	2	2	2	2	2
anonymous	EN	1	UK	1	60	5	1	1	1	4	1	4	1	1	4	1	1	4	4	1
anonymous	EN	1	United States	1	62	26	1	1	2	4	1	4	1	1	4	1	1	4	4	1
anonymous	EN	1	UK	2	70	5	2	2	3	4	2	3	1	1	4	1	1	2	4	1
anonymous	EN	1	USA	1	63	20	1	1	3	4	1	4	1	2	3	2	1	2	4	1
anonymous	EN	1	United States	1	57	110	2	1	4	3	1	4	1	2	3	1	1	3	2	1
anonymous	EN	1	United States	2	62	10	1	1	2	4	1	4	2	1	4	1	1	4	4	2
anonymous	EN	1	United States	1	66	11	1	1	1	4	1	4	1	1	4	1	1	4	4	1
anonymous	EN	1	United Kingdom	1	58	86	1	1	4	3	1	4	1	1	3	1	1	3	2	1
anonymous	EN	1	Ireland	2	51	130	1	1	2	3	1	3	1	1	4	1	1	3	4	1
anonymous	EN	1	Ireland	2	26	2	1	2	2	3	1	3	2	1	4	1	1	3	4	2
anonymous	EN	1	Ireland	2	59	13	2	2	1	4	1	4	1	1	3	2	1	3	3	1
anonymous	EN	1	Ireland	1	54	25	1	1	1	4	1	4	1	1	4	1	1	4	4	1
anonymous	EN	1	England	1	33	17	1	1	2	4	1	4	1	1	4	1	1	4	4	1
anonymous	EN	1	Ireland	2	48	12	1	2	2	3	2	3	3	2	3	2	2	2	2	2
anonymous	EN	1	Wales	2	69	29	1	2	2	3	3	3	1	1	4	1	1	4	4	2
anonymous	EN	1	ireland	1	33	2	1	1	2	2	1	2	2	1	3	1	1	3	2	2
anonymous	PT-BR	1	Brasil	1	49	41	1	1	3	4	1	4	1	1	4	1	1	4	4	2
anonymous	PT-BR	1	Brasil	1	46	18	1	3	2	4	2	2	2	2	3	2	2	3	3	3
anonymous	PT-BR	1	Brasil	1	66	26	1	1	3	4	1	3	1	1	4	1	1	3	3	1
anonymous	PT-BR	1	Brasil	2	48	12	1	1	1	4	1	4	1	1	4	1	1	3	3	3
anonymous	PT-BR	1	brazil	2	45	4	3	3	3	2	3	2	3	3	1	2	2	1	2	2
anonymous	PT-BR	1	Brasil	1	48	10	2	2	3	3	2	4	2	1	2	3	3	2	3	3
anonymous	PT-BR	1	Brasil	2	40	4	1	1	3	4	1	4	2	1	2	1	1	3	4	1
anonymous	PT-BR	1	Brasil	1	53	91	1	1	2	4	1	4	1	1	3	3	1	3	4	3
anonymous	PT-BR	1	Brasil	2	47	22	1	2	2	4	1	4	1	1	2	2	1	3	4	2
anonymous	PT-BR	1	Brasil	1	55	83	1	1	3	4	1	4	1	1	4	3	1	4	4	3
anonymous	PT-BR	1	Brazil	1	52	8	1	1	2	3	1	2	1	1	2	2	1	2	2	2
anonymous	PT-BR	1	Brasil	1	61	6	1	2	3	4	1	4	1	1	3	2	1	2	3	2
anonymous	PT-BR	1	Brasil	2	51	10	2	2	4	3	1	4	1	1	3	2	2	4	4	3
anonymous	PT-BR	1	Brasil	2	54	56	1	1	2	4	3	4	1	1	4	1	1	4	4	2
anonymous	PT-BR	1	Brasil	1	54	18	1	1	2	4	1	3	1	2	4	1	2	3	3	2
anonymous	EN	1	Brazil	1	45	18	1	1	2	4	1	4	2	1	4	1	1	4	4	2
anonymous	PT-BR	1	brasil	1	49	19	1	1	3	4	3	3	2	1	3	3	3	1	2	2
anonymous	PT-BR	1	Brasil	2	47	6	1	3	1	4	1	3	1	1	4	1	1	3	4	2
anonymous	PT-BR	1	Brazil	1	43	43	2	3	3	3	1	3	1	1	3	2	2	2	3	4
anonymous	PT-BR	1	Brasil	1	61	70	1	1	2	3	1	4	1	1	4	1	1	3	3	2
anonymous	PT-BR	1	Brasil	1	56	221	1	1	2	4	1	4	1	1	3	1	1	3	4	2
anonymous	PT-BR	1	Brazil	1	42	10	1	1	3	3	1	3	2	2	4	1	1	3	3	1
anonymous	PT-BR	1	Brasil	1	35	1	2	2	4	3	2	3	1	1	4	1	1	3	3	2
anonymous	PT-BR	1	Brasil	1	51	101	1	2	2	4	1	4	1	1	3	2	1	3	4	3
anonymous	PT-BR	1	Brasil	2	42	2	1	1	2	4	1	4	1	1	4	1	1	2	4	3
anonymous	PT-BR	1	Brasil	1	43	95	1	1	4	4	2	4	1	1	3	2	1	2	3	3
anonymous	PT-BR	1	Brasil	1	44	21	1	1	2	4	1	4	1	1	3	1	1	3	4	1
anonymous	PT-BR	1	Brasil	2	50	35	1	1	2	4	2	4	1	1	4	1	1	3	3	2
anonymous	PT-BR	1	Brasil	2	44	7	1	4	4	3	2	3	2	2	2	3	2	3	3	3
anonymous	PT-BR	1	Brasil	1	31	25	3	4	3	3	2	3	2	1	2	2	2	3	3	2
anonymous	PT-BR	1	Brasil	1	64	50	1	1	1	4	2	4	1	1	4	1	1	3	4	1
anonymous	PT-BR	1	Brasil	2	49	40	3	1	3	3	3	2	3	3	2	2	2	1	3	2
anonymous	PT-BR	1	Brasil	1	48	1	1	2	2	4	1	4	1	1	3	1	1	3	4	2
anonymous	PT-BR	1	Brasil	1	38	29	1	1	2	3	1	2	1	1	4	1	1	2	3	1
anonymous	PT-BR	1	Brasil	1	38	5	1	1	2	4	1	4	1	1	4	1	1	4	4	1
anonymous	PT-BR	1	Brasil	1	47	8	3	1	1	4	1	4	2	1	2	2	1	4	3	3
anonymous	PT-BR	1	Brasil	1	47	2	1	1	1	4	1	4	1	1	4	1	1	2	4	1
anonymous	PT-BR	1	Brasil	1	38	2	1	2	1	4	1	3	1	1	4	1	1	3	3	1
anonymous	PT-BR	1	Brasil	1	44	12	1	2	4	4	1	3	2	1	4	1	3	4	4	1
anonymous	PT-BR	1	Brazil	1	61	30	1	3	2	4	2	4	1	1	4	2	1	2	3	2
anonymous	PT-BR	1	Brazil	1	57	80	1	1	2	4	1	4	1	1	4	1	1	3	3	1
anonymous	PT-BR	1	Brasil	2	64	34	2	2	1	2	2	2	3	1	3	1	1	3	3	2
anonymous	PT-BR	1	Brazil	1	44	11	1	2	1	2	1	4	2	1	2	3	2	1	2	3
anonymous	PT-BR	1	Brasil	2	63	30	1	2	1	4	1	4	1	1	4	1	1	4	4	1
anonymous	PT-BR	1	Brasil	2	38	8	1	2	2	4	1	4	2	2	2	2	1	2	2	2
anonymous	PT-BR	1	Brasil	2	53	2	1	2	2	4	1	4	1	1	4	1	1	4	4	2
anonymous	PT-BR	1	Brazil	2	47	6	3	1	4	2	3	2	4	2	3	2	4	1	2	3
anonymous	PT	1	Brasil	2	37	10	3	3	3	2	3	2	3	2	3	3	3	2	2	3
anonymous	PT-BR	1	Brasil	1	43	3	1	1	1	3	1	2	2	1	2	2	2	2	1	1
anonymous	PT-BR	1	Brasil	2	42	20	1	3	3	4	1	4	1	1	2	2	1	2	4	2
anonymous	PT-BR	1	Brasil	1	50	4	1	2	2	4	1	4	1	1	4	1	1	4	4	1
anonymous	PT-BR	1	brasil	1	57	30	1	1	1	4	1	4	1	1	3	1	1	3	3	1
anonymous	PT-BR	1	Brasil	2	45	15	2	1	3	3	3	1	3	1	2	2	2	2	2	4
anonymous	PT-BR	1	Brasil	1	47	7	1	1	2	4	1	4	1	1	4	1	1	3	4	1
anonymous	PT-BR	1	Brasil	1	53	30	1	1	3	4	2	4	1	1	4	1	1	3	4	2
anonymous	PT-BR	1	Brasil	2	57	12	1	2	2	4	1	4	1	1	3	2	1	3	4	3
anonymous	EN	1	Ireland	2	31	10	2	2	3	3	2	4	2	3	3	2	1	3	3	2
anonymous	DE	1	Österreich	1	65	258	1	1	2	3	1	3	1	1	3	1	1	3	3	1
anonymous	EN	1	Ireland	2	56	113	1	1	2	4	1	4	2	1	3	1	1	3	3	3
anonymous	DE	1	Österreich	1	52	300	1	1	1	3	1	4	1	1	4	1	1	4	4	2
anonymous	EN	1	UK	2	46	10	2	2	2	3	1	3	2	1	4	1	1	4	4	1
anonymous	EN	1	UK	2	61	207	1	2	2	3	2	4	1	1	3	2	1	3	3	1
anonymous	EN	1	UK	2	59	693	3	4	4	1	4	1	4	2	2	2	3	2	1	3
anonymous	EN	1	England	2	49	7	1	1	1	4	1	4	1	1	3	3	1	2	3	1
anonymous	EN	1	England	1	27	265	2	2	2	3	2	3	3	1	3	1	1	2	2	2
anonymous	PT-BR	1	Brasil	1	57	3	1	3	1	3	1	4	1	1	4	1	1	3	4	1
anonymous	EN	1	England	1	56	25	1	2	3	3	1	3	2	1	3	2	1	2	2	1
anonymous	EN	1	Ireland	1	71	412	2	2	2	3	2	4	2	2	4	2	1	3	4	2
anonymous	EN	1	Ireland	1	31	60	1	1	2	3	1	4	1	1	4	2	1	2	3	1
anonymous	EN	1	Ireland	2	63	52	1	1	2	4	1	4	1	1	4	1	1	3	4	1
anonymous	EN	1	USA	2	69	52	1	2	1	4	4	4	1	2	3	2	1	3	4	3
anonymous	EN	1	USA	2	61	17	1	1	2	3	1	4	1	1	2	1	1	4	3	1
anonymous	EN	1	USA	1	69	351	1	2	1	4	2	4	1	2	4	1	1	4	4	1
anonymous	EN	1	USA	1	70	150	1	1	1	4	1	4	1	1	4	1	1	4	4	1
anonymous	EN	1	USA	2	66	13	2	1	3	2	2	2	2	3	3	1	4	2	1	3
anonymous	EN	1	USA	2	62	469	1	1	1	4	1	4	1	1	3	1	1	3	4	1
anonymous	EN	1	USA	2	69	5	1	1	1	4	1	4	1	1	4	1	1	4	4	1
anonymous	EN	1	UK	2	49	85	2	2	4	2	4	3	2	3	2	2	1	2	1	3
anonymous	EN	1	Ireland	2	52	117	1	1	1	3	1	3	2	1	3	2	1	2	2	3
anonymous	EN	1	USA	1	68	70	1	1	1	4	2	4	1	1	4	1	1	4	4	1
anonymous	EN	1	USA	3	26	4	4	3	3	2	4	2	4	4	1	2	2	1	2	3
anonymous	EN	1	USA	2	70	21	1	1	2	3	1	4	1	1	4	1	1	4	4	1
anonymous	EN	1	USA	2	61	4	1	1	3	4	1	4	3	2	4	1	1	4	4	1
anonymous	EN	1	USA	2	64	63	1	2	3	3	1	4	1	3	4	1	1	3	3	1
anonymous	EN	1	Austria	2	47	6	2	2	3	2	2	2	3	2	3	1	1	2	1	1
anonymous	EN	1	USA	2	70	21	1	1	2	3	1	3	1	1	4	1	1	4	4	1
anonymous	EN	1	USA	2	70	3	3	2	1	2	3	4	4	1	3	2	1	2	2	2
anonymous	EN	1	USA	2	58	6	1	1	2	4	1	4	1	1	4	1	1	4	4	1
anonymous	EN	1	United States	2	71	50	1	2	2	4	1	4	1	1	3	3	1	3	4	2
anonymous	EN	1	USA	2	75	100	1	1	1	4	1	4	1	1	4	1	1	4	4	1
anonymous	EN	1	USA	1	51	14	3	2	3	3	1	3	1	1	3	1	1	2	2	2
anonymous	EN	1	USA	2	77	30	1	2	4	4	1	4	2	1	4	1	1	4	3	1
anonymous	EN	1	America	2	70	28	1	1	3	4	1	4	1	1	4	1	1	4	4	1
anonymous	EN	1	USA	1	69	1064	1	1	1	4	1	4	1	1	4	1	1	4	4	1
anonymous	EN	1	United States	2	70	10	2	2	2	3	2	3	2	1	2	1	1	3	2	2
anonymous	EN	1	United States	2	79	296	1	1	1	4	1	4	1	2	4	1	1	4	4	1
anonymous	EN	1	England	2	64	215	2	2	3	3	2	3	2	2	2	1	1	2	3	2
anonymous	EN	1	England	2	66	465	3	4	2	1	4	2	4	2	3	2	3	3	2	2
anonymous	EN	1	UK	2	33	117	2	2	1	4	2	3	2	3	4	1	1	4	4	2
anonymous	EN	1	USA	2	64	50	1	1	1	4	1	4	1	1	4	1	1	4	4	1
anonymous	EN	1	USA	2	75	152	2	1	3	3	3	3	2	2	3	1	1	2	2	3
anonymous	EN	1	usa	2	73	30	1	1	4	3	1	4	2	2	2	1	1	2	2	2
anonymous	EN	1	Usa	2	67	103	1	1	1	4	1	4	1	1	3	1	1	3	3	1
anonymous	EN	1	Wales	2	65	7	1	3	2	4	1	2	1	2	4	1	1	4	4	1
anonymous	EN	1	UK	2	41	24	1	1	1	3	1	3	1	2	3	1	1	2	3	1
anonymous	EN	1	uk	2	62	206	2	2	3	3	2	4	2	1	4	1	1	3	4	1
anonymous	EN	1	US	2	57	36	1	1	2	4	1	4	1	2	4	1	1	4	4	1
anonymous	EN	1	IRELAND	1	54	103	1	1	2	4	1	4	1	2	4	1	1	4	4	2
anonymous	EN	1	Ireland	1	45	29	1	1	3	4	1	4	1	1	4	1	1	4	4	1
anonymous	EN	1	England	2	58	508	4	4	4	1	4	1	4	4	2	2	2	1	1	4
anonymous	EN	1	usa	2	72	572	3	2	3	3	1	3	1	1	4	1	1	4	4	1
anonymous	EN	1	Portugal	2	37	9	1	2	3	4	1	4	1	1	2	2	1	2	3	1
anonymous	EN	1	Ireland	1	49	43	1	1	2	3	1	3	1	1	4	1	1	4	4	1
anonymous	EN	1	Ireland	2	50	89	1	1	1	4	1	4	1	1	4	1	1	4	4	1
anonymous	EN	1	Germany	2	48	61	2	2	1	3	3	3	1	1	4	1	1	3	3	1
anonymous	NL	1	Nederland	1	62	60	1	1	2	4	1	4	1	1	4	1	1	4	4	1
